# Supplementary material for: A catalytic highly enantioselective allene approach to oxazolines
Source: PubMed Central journal article supplement — Chem Sci. 2018 Jan 5;9(7):1964–9. doi: 10.1039/c7sc04079b (PMC5909368; doi:10.1039/c7sc04079b), 2018-01-05
Supplement: SC-009-C7SC04079B-s001.pdf [file SC-009-C7SC04079B-s001.pdf]

Supporting Information

**A Catalytic Highly Enantioselective Allene Approach to  
Oxazolines**

Hongwen Luo,<sup>[b]</sup> Zheng Yang,<sup>[a]</sup> Weilong Lin,<sup>[a]</sup> Yangguangyan Zheng,<sup>[c]</sup> and  
Shengming Ma<sup>\*[a,c]</sup>

[a] State Key Laboratory of Organometallic Chemistry, Shanghai Institute of Organic  
Chemistry, Chinese Academy of Sciences, 345 Lingling Lu, Shanghai 200032, P. R.  
China

[b] Shanghai Key Laboratory of Green Chemistry and Chemical Process, Department  
of Chemistry, East China Normal University, 3663 North Zhongshan Lu, Shanghai  
200062, P. R. China

[c] Department of Chemistry, Fudan University, 220 Handan Road, Shanghai 200433,  
P. R. China

Fax: (+86)21-61647516

E-mail: [masm@sioc.ac.cn](mailto:masm@sioc.ac.cn)

|                                                                  |          |
|------------------------------------------------------------------|----------|
| General information                                              | S2       |
| Screening of ligands not listed in Scheme 3                      | S3       |
| Screening of bases not listed in Table 1                         | S4       |
| Screening of solvents not listed in Table 2                      | S5       |
| Study of aromatic solvents and temperature                       | S6       |
| Optimization of concentration                                    | S7       |
| Experimental details and analytical data                         | S8-S33   |
| References                                                       | S34      |
| <sup>1</sup> H, <sup>13</sup> C NMR and HPLC spectra of products | S35-S169 |

**General Information.** NMR spectra were taken with an Agilent-400 spectrometer (400 MHz for  $^1\text{H}$  NMR, 100 MHz for  $^{13}\text{C}$  NMR, and 376 MHz for  $^{19}\text{F}$  NMR) in  $\text{CDCl}_3$ . Chemical shifts for  $^1\text{H}$  NMR and  $^{13}\text{C}$  NMR were recorded in ppm in relative to the TMS in  $\text{CDCl}_3$ , and those for  $^{19}\text{F}$  NMR were recorded in ppm in relative to the  $\text{CFCl}_3$  as internal standard, and coupling constants were reported in Hz. All reactions were carried out in flame-dried Schlenk tube under argon atmosphere.  $\text{Pd}_2(\text{dba})_3 \cdot \text{CHCl}_3$  was purchased from Alfa Aesar; (*R,R*)-ANDEN-Phenyl Trost ligand (**L10**) used in Scheme 1, Table 1-2 (except entry 13, Table 2), and Table S3-S4 was purchased from Sigma-Aldrich; (*R,R*)-ANDEN-Phenyl Trost ligand (**L10**) used in Table 3 and Table S5-S6 was synthesized according to the literature,<sup>[1]</sup> and the chiral material (11*R*,12*R*)-9,10-dihydro-9,10-ethanoanthracene-11,12-diamine (> 99% *ee*) used in reaction was purchased from AstaTech Pharmaceutical Co., Ltd. (Chengdu, China). Aryl iodides were all commercially available used as received except iodobenzene, which was distilled before used. Cesium carbonate and 5-chloro-1*H*-indole were purchased from Sun Chemical Technology Co., Ltd (Shanghai, China) and used as received. CuI and diethylamine were purchased from Sinopharm Chemical Reagent Co., Ltd (Shanghai, China) and used as received. Benzene and 1,4-dioxane were dried over sodium wire with benzophenone as the indicator and distilled freshly before use. All the temperatures are referred to the oil baths used. *N*-(Buta-2,3-dienyl)amide<sup>[2a]</sup> and racemic oxazolines<sup>[2b]</sup> were synthesized according to the reported procedures.

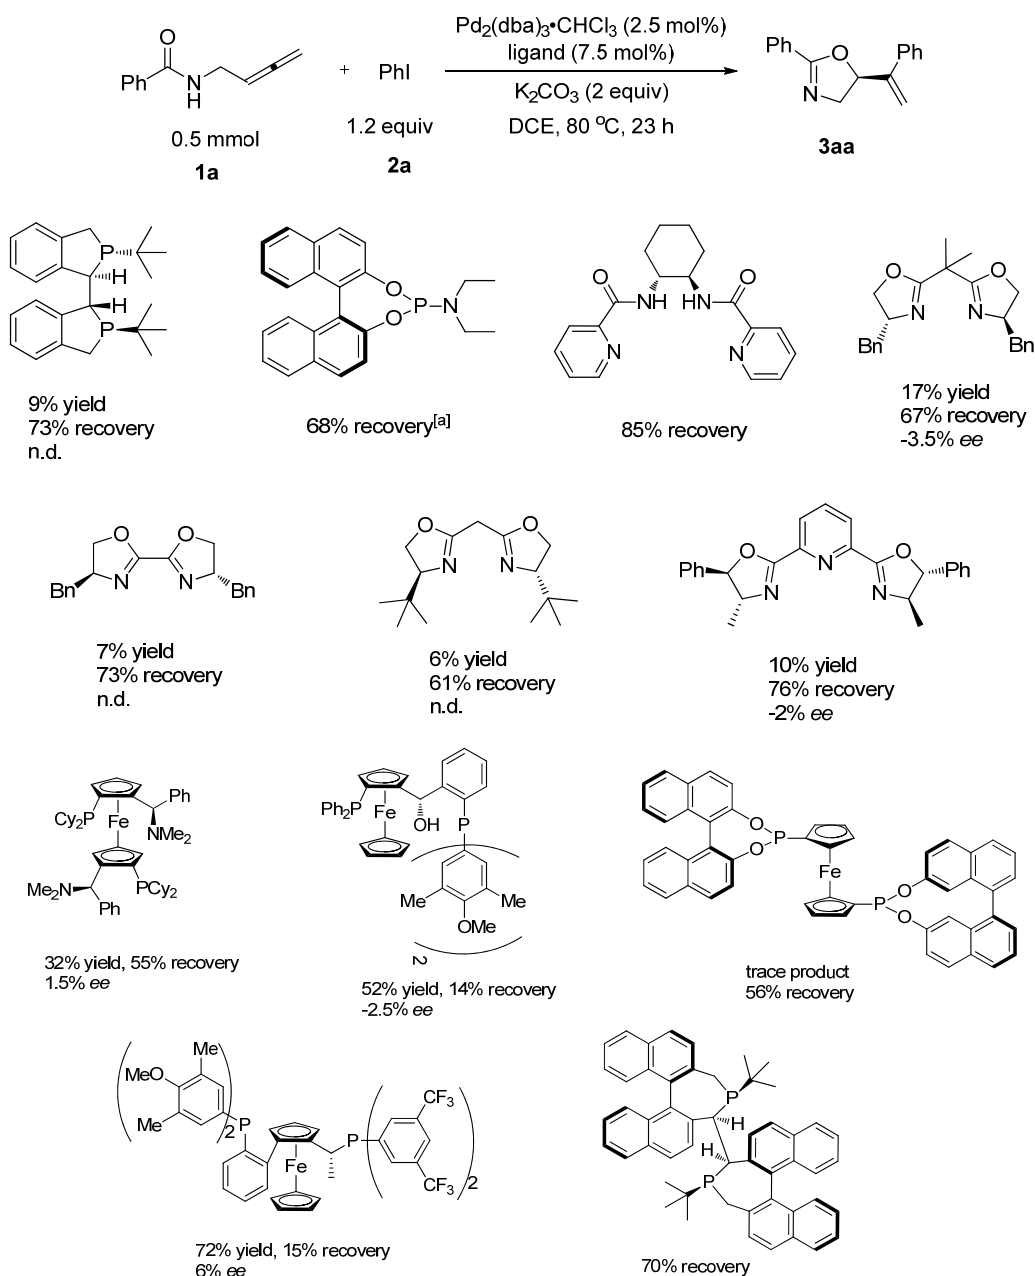

**Scheme S1.** Other ligands studied in the palladium-catalyzed asymmetric coupling-cyclization reaction of *N*-(buta-2,3-dienyl)amide **1a** with iodobenzene **2a**. Experiments were performed with **1a** (0.5 mmol), **2a** (0.6 mmol),  $\text{Pd}_2(\text{dba})_3 \cdot \text{CHCl}_3$  (0.0125 mmol), ligand (0.0375 mmol), and  $\text{K}_2\text{CO}_3$  (1.0 mmol) in DCE (5 mL) for 23 h at 80 °C under Ar atmosphere. The yield of **3aa** and recovery of **1a** were determined by  $^1\text{H}$  NMR analysis using 1,3,5-trimethylbenzene as the internal standard. The *ee* values were determined by HPLC analysis. n.d.= not determine. [a] 0.0625 mmol of ligand was used.

**Table S1.** Other bases studied in the palladium-catalyzed asymmetric coupling-cyclization reaction of *N*-(buta-2,3-dienyl)amide **1a** with iodobenzene **2a**.<sup>[a]</sup>

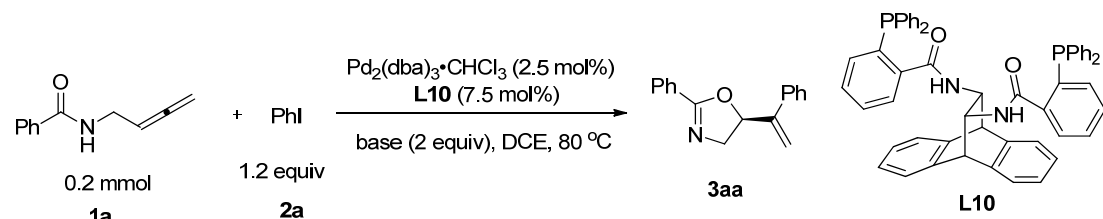

| Entry | Base                     | Time (h) | <b>3aa</b>               |                              | Recovery of <b>1a</b><br>(%) <sup>[b]</sup> |
|-------|--------------------------|----------|--------------------------|------------------------------|---------------------------------------------|
|       |                          |          | Yield (%) <sup>[b]</sup> | <i>ee</i> (%) <sup>[c]</sup> |                                             |
| 1     | $\text{Li}_2\text{CO}_3$ | 22.5     | -                        | -                            | 80                                          |
| 2     | $\text{NaHCO}_3$         | 23       | 35                       | 47                           | 61                                          |
| 3     | $\text{KHCO}_3$          | 23       | 35                       | 50                           | 54                                          |
| 4     | LiF                      | 22.6     | -                        | -                            | 81                                          |
| 5     | NaF                      | 22.6     | -                        | -                            | 79                                          |
| 6     | KF                       | 22.3     | 29                       | 10                           | 56                                          |
| 7     | CsF                      | 22.3     | 35                       | 13                           | 46                                          |
| 8     | $\text{K}_2\text{HPO}_4$ | 23       | 9                        | n.d. <sup>[d]</sup>          | 73                                          |
| 9     | $\text{KH}_2\text{PO}_4$ | 23       | -                        | -                            | 80                                          |
| 10    | $\text{NaO}^i\text{Bu}$  | 23       | 7                        | n.d. <sup>[d]</sup>          | 65                                          |
| 11    | $\text{KO}^i\text{Bu}$   | 22.8     | -                        | -                            | 79                                          |
| 12    | NaOMe                    | 22.8     | 16                       | n.d. <sup>[d]</sup>          | 59                                          |
| 13    | NaOEt                    | 23       | 13                       | n.d. <sup>[d]</sup>          | 61                                          |
| 14    | $\text{NaO}^i\text{Pr}$  | 23       | 25                       | 43                           | 51                                          |
| 15    | TMEDA                    | 23       | 6                        | n.d. <sup>[d]</sup>          | 66                                          |
| 16    | DMAP                     | 23       | -                        | -                            | 48                                          |
| 17    | DBU                      | 23       | -                        | -                            | 41                                          |
| 18    | DABCO                    | 23       | -                        | -                            | 78                                          |

[a] Experiments were performed with **1a** (0.2 mmol), **2a** (0.24 mmol),  $\text{Pd}_2(\text{dba})_3 \cdot \text{CHCl}_3$  (0.005 mmol), **L10** (0.015 mmol), and base (0.4 mmol) in DCE (2 mL) at 80 °C under Ar atmosphere. [b] The yield and recovery were determined by  $^1\text{H}$  NMR analysis using 1,3,5-trimethylbenzene as the internal standard. [c] The *ee* values were determined by HPLC analysis. [d] n.d.= not determined.



**Table S2.** Other solvents studied in the palladium-catalyzed asymmetric coupling-cyclization reaction of *N*-(buta-2,3-dienyl)amide **1a** with iodobenzene **2a**.<sup>[a]</sup>

Reaction scheme: **1a** (0.2 mmol) + **2a** (1.2 equiv)  $\xrightarrow[\text{Cs}_2\text{CO}_3 (2 \text{ equiv}), \text{solvent, temp., 23 h}]{\text{Pd}_2(\text{dba})_3 \cdot \text{CHCl}_3 (2.5 \text{ mol}\%), \text{L10} (7.5 \text{ mol}\%)}$  **3aa**.  
**L10** structure: A complex ligand with two PPh<sub>2</sub> groups and a central nitrogen atom coordinated to a metal center.

| Entry | Solvent                              | Temp. (°C) | <b>3aa</b>               |                              | Recovery of <b>1a</b> (%) <sup>[b]</sup> |
|-------|--------------------------------------|------------|--------------------------|------------------------------|------------------------------------------|
|       |                                      |            | Yield (%) <sup>[b]</sup> | <i>ee</i> (%) <sup>[c]</sup> |                                          |
| 1     | CHCl <sub>3</sub>                    | 70         | 9                        | n.d. <sup>[d]</sup>          | 60                                       |
| 2     | CCl <sub>4</sub>                     | 80         | -                        | -                            | 63                                       |
| 3     | CHCl <sub>2</sub> CHCl <sub>2</sub>  | 80         | -                        | -                            | 79                                       |
| 4     | CH <sub>2</sub> BrCH <sub>2</sub> Br | 80         | 55                       | 7                            | 7                                        |
| 5     | <i>n</i> -Hexane                     | 70         | 61                       | 26                           | 10                                       |
| 6     | <sup>t</sup> BuOH                    | 80         | 68                       | 39                           | 3                                        |
| 7     | DMF                                  | 80         | 75                       | 3                            | 7                                        |
| 8     | DMSO                                 | 80         | 62                       | 0                            | -                                        |
| 9     | NMP                                  | 80         | 62                       | 0                            | -                                        |
| 10    | CH <sub>3</sub> NO <sub>2</sub>      | 80         | -                        | -                            | 54                                       |
| 11    | CH <sub>3</sub> CN                   | 80         | 55                       | 14                           | 39                                       |
| 12    | EtOAc                                | 80         | 78                       | 57                           | 3                                        |
| 13    | TEA                                  | 80         | 48                       | 60                           | 7                                        |

[a] Experiments were performed with **1a** (0.2 mmol), **2a** (0.24 mmol), Pd<sub>2</sub>(dba)<sub>3</sub>·CHCl<sub>3</sub> (0.005 mmol), **L10** (0.015 mmol), and Cs<sub>2</sub>CO<sub>3</sub> (0.4 mmol) in solvent (2 mL) for 23 h under Ar atmosphere. [b] The yield and recovery were determined by <sup>1</sup>H NMR analysis using 1,3,5-trimethylbenzene as the internal standard. [c] The *ee* values were determined by HPLC analysis. <sup>d</sup> n.d.= not determined.

**Table S3.** Studies of solvent and temperature in the palladium-catalyzed asymmetric coupling-cyclization reaction of *N*-(buta-2,3-dienyl)amide **1a** with iodobenzene **2a**.<sup>[a]</sup>

$\text{Pd}_2(\text{dba})_3 \cdot \text{CHCl}_3$  (2.5 mol%)  
**L10** (7.5 mol%)  
 $\text{Cs}_2\text{CO}_3$  (2 equiv), solvent  
 rt (0.5 h), then temp. (time)

| Entry    | Solvent          | Temp. (°C) | Time (h)  | <i>(S)</i> - <b>3aa</b>  |                              | Recovery of <b>1a</b><br>(%) <sup>[b]</sup> |
|----------|------------------|------------|-----------|--------------------------|------------------------------|---------------------------------------------|
|          |                  |            |           | Yield (%) <sup>[b]</sup> | <i>ee</i> (%) <sup>[c]</sup> |                                             |
| 1        | <i>c</i> -Hexane | 90         | 16        | 84                       | 85                           | -                                           |
| 2        | PhF              | 90         | 19.5      | 87                       | 86                           | -                                           |
| 3        | <i>o</i> -Xylene | 90         | 16        | 85                       | 88                           | -                                           |
| 4        | <i>m</i> -Xylene | 90         | 16        | 80                       | 90                           | -                                           |
| 5        | <i>p</i> -Xylene | 90         | 16        | 86                       | 90                           | -                                           |
| <b>6</b> | <b>Benzene</b>   | <b>90</b>  | <b>24</b> | <b>81</b>                | <b>92</b>                    | -                                           |
| 7        | Benzene          | 85         | 24        | 82                       | 90                           | 4                                           |
| 8        | Benzene          | 80         | 24        | 82                       | 91                           | 4                                           |
| 9        | Benzene          | 75         | 41        | 79                       | 90                           | 2                                           |
| 10       | Benzene          | 70         | 44        | 77                       | 91                           | 8                                           |

[a] Experiments were performed with **1a** (0.5 mmol), **2a** (1.0 mmol),  $\text{Pd}_2(\text{dba})_3 \cdot \text{CHCl}_3$  (0.0125 mmol), **L10** (0.0375 mmol), and  $\text{Cs}_2\text{CO}_3$  (1.0 mmol) in solvent (4 mL) at 90 °C under Ar atmosphere. [b] The yield and recovery were determined by <sup>1</sup>H NMR analysis using 1,3,5-trimethylbenzene as the internal standard. [c] The *ee* values were determined by HPLC analysis.

**Table S4.** Concentration effect in the palladium-catalyzed asymmetric coupling-cyclization reaction of *N*-(buta-2,3-dienyl)amide **1a** with iodobenzene **2a**.<sup>[a]</sup>

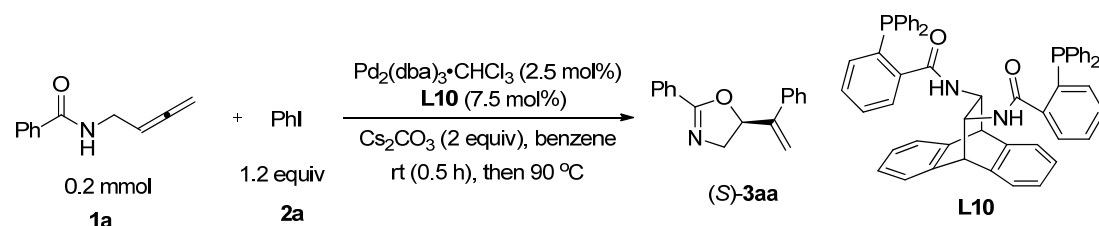

| Entry    | Benzene (mL) | Time (h)  | <b>(S)-3aa</b>               |                              | Recovery of <b>1a</b><br>(%) <sup>[b]</sup> |
|----------|--------------|-----------|------------------------------|------------------------------|---------------------------------------------|
|          |              |           | Yield (%) <sup>[b]</sup>     | <i>ee</i> (%) <sup>[c]</sup> |                                             |
| 1        | 2            | 24        | 85                           | 91                           | -                                           |
| 2        | 3            | 24        | 77                           | 92                           | -                                           |
| 3        | 5            | 24        | 87                           | 93                           | 3                                           |
| 4        | 6            | 24        | 81                           | 94                           | 5                                           |
| <b>5</b> | <b>6</b>     | <b>39</b> | <b>90 (83<sup>[d]</sup>)</b> | <b>94</b>                    | -                                           |
| 6        | 7            | 30        | 87                           | 94                           | 5                                           |
| 7        | 8            | 30        | 82                           | 94                           | 8                                           |

[a] Experiments were performed with **1a** (0.5 mmol), **2a** (1.0 mmol),  $\text{Pd}_2(\text{dba})_3 \cdot \text{CHCl}_3$  (0.0125 mmol), **L10** (0.0375 mmol), and  $\text{Cs}_2\text{CO}_3$  (1.0 mmol) in benzene at 90 °C under Ar atmosphere. [b] The yield and recovery were determined by <sup>1</sup>H NMR analysis using 1,3,5-trimethylbenzene as the internal standard. [c] The *ee* values were determined by HPLC analysis. [d] Isolated yield.

## Experimental details and analytical data

### (1) (*S*)-2-Phenyl-5-(1-phenylvinyl)-4,5-dihydrooxazole ((*S*)-**3aa**) (Table 3) (lhw-13-145)

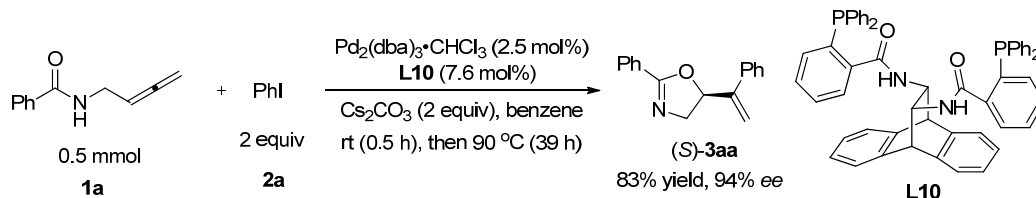

**Typical Procedure I:** After the Schlenk tube containing  $\text{Cs}_2\text{CO}_3$  (326.3 mg, 1.0 mmol) was dried for 3 minutes with a heating gun under vacuum and filled with argon,  $\text{Pd}_2(\text{dba})_3 \cdot \text{CHCl}_3$  (12.9 mg, 0.0125 mmol), (*R,R*)-ANDEN-Phenyl Trost ligand (**L10**) (30.9 mg, 0.0380 mmol), and **1a** (86.1 mg, 0.5 mmol) were added sequentially. After replacing air with argon for three times under vacuum, **2a** (210.0 mg, 1.0 mmol)/benzene (6.0 mL) was added. The resulting mixture was stirred for 0.5 h at rt and then transferred to oil bath preheated at 90 °C. When the reaction was complete as monitored by TLC, the mixture was filtrated through a short pad of silica gel with  $\text{Et}_2\text{O}$  (25 mL) as eluent. After removal of the solvent under vacuum, the residue was purified by flash chromatography on silica gel to afford (*S*)-**3aa** (103.4 mg, 83%) (eluent: petroleum ether (b.p. 30-60 °C)/ethyl acetate = 15/1 to 10/1) as a liquid: 94% *ee* (HPLC conditions: PC-2 column, hexane/*i*-PrOH = 90/10, 1.0 mL/min,  $\lambda = 214$  nm,  $t_R$  (minor) = 13.6 min,  $t_R$  (major) = 10.7 min);  $[\alpha]_D^{20} = +200.6$  ( $c = 1.02$ ,  $\text{CHCl}_3$ );  $^1\text{H}$  NMR (400 MHz,  $\text{CDCl}_3$ )  $\delta = 8.05$ -7.99 (m, 2 H, Ar-H), 7.54-7.47 (m, 1 H, Ar-H), 7.47-7.41 (m, 2 H, Ar-H), 7.40-7.28 (m, 5 H, Ar-H), 5.64-5.57 (m, 1 H, OCH), 5.46 (s, 1 H, one proton in =CH<sub>2</sub>), 5.42 (s, 1 H, one proton in =CH<sub>2</sub>), 4.29 (dd,  $J_1 = 15.0$  Hz,  $J_2 = 10.6$  Hz, 1 H, one proton in NCH<sub>2</sub>), 3.80 (dd,  $J_1 = 15.0$  Hz,  $J_2 = 7.8$  Hz, 1 H, one proton in NCH<sub>2</sub>);  $^{13}\text{C}$  NMR (100 MHz,  $\text{CDCl}_3$ )  $\delta = 163.8$ , 146.8, 137.9, 131.4, 128.6, 128.4, 128.2, 128.1, 127.6, 126.5, 112.4, 80.0, 61.0; IR (neat,  $\text{cm}^{-1}$ ): 1651, 1495, 1448, 1330, 1255, 1081, 1061, 1024; MS (70 eV, EI)  $m/z$  (%): 250 ( $\text{M}^+ + 1$ , 6.07), 249 ( $\text{M}^+$ , 32.02), 117 (100); HRMS Calcd for  $\text{C}_{17}\text{H}_{15}\text{NO}$  ( $\text{M}^+$ ): 249.1154, Found: 249.1151.

The following compounds (*S*)-**3ba** to (*S*)-**3la**, and (*S*)-**3ab** to (*S*)-**3an** were

prepared according to this **Typical Procedure I**.

**(2) (S)-2-(2-Methylphenyl)-5-(1-phenylvinyl)-4,5-dihydrooxazole ((S)-3ba) (Table 3) (lhw-13-173)**

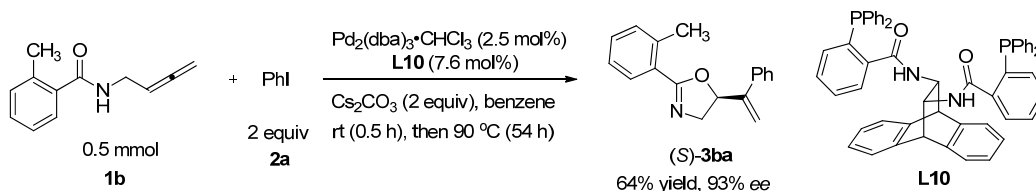

The reaction of  $\text{Pd}_2(\text{dba})_3 \cdot \text{CHCl}_3$  (12.8 mg, 0.0124 mmol), **L10** (30.8 mg, 0.0379 mmol),  $\text{Cs}_2\text{CO}_3$  (326.1 mg, 1.0 mmol), **1b** (93.9 mg, 0.5 mmol), and **2a** (205.8 mg, 1.0 mmol) in benzene (4.0 mL) afforded (S)-**3ba** (84.5 mg, 64%) (eluent: petroleum ether (b.p. 30-60 °C)/ethyl acetate = 30/1 to 20/1) as a liquid: 93% *ee* (HPLC conditions: OJ-H column, hexane/*i*-PrOH = 95/5, 1.0 mL/min,  $\lambda = 214$  nm,  $t_R$  (minor) = 20.4 min,  $t_R$  (major) = 16.2 min);  $[\alpha]_D^{20} = +161.9$  ( $c = 1.03$ ,  $\text{CHCl}_3$ );  $^1\text{H}$  NMR (400 MHz,  $\text{CDCl}_3$ )  $\delta = 7.90$  (d,  $J = 7.6$  Hz, 1 H, Ar-H), 7.41-7.29 (m, 6 H, Ar-H), 7.28-7.21 (m, 2 H, Ar-H), 5.59-5.52 (m, 1 H, OCH), 5.45 (s, 1 H, one proton in  $=\text{CH}_2$ ), 5.43 (s, 1 H, one proton in  $=\text{CH}_2$ ), 4.33 (dd,  $J_1 = 14.8$  Hz,  $J_2 = 10.4$  Hz, 1 H, one proton in  $\text{NCH}_2$ ), 3.85 (dd,  $J_1 = 15.0$  Hz,  $J_2 = 7.8$  Hz, 1 H, one proton in  $\text{NCH}_2$ ), 2.61 (s, 3 H,  $\text{CH}_3$ );  $^{13}\text{C}$  NMR (100 MHz,  $\text{CDCl}_3$ )  $\delta = 164.2$ , 147.0, 138.9, 138.1, 131.3, 130.6, 129.8, 128.6, 128.1, 126.9, 126.6, 125.6, 112.5, 79.3, 61.4, 21.9; IR (neat,  $\text{cm}^{-1}$ ): 1644, 1494, 1323, 1244, 1042; MS (70 eV, EI)  $m/z$  (%): 264 ( $\text{M}^+ + 1$ , 16.64), 263 ( $\text{M}^+$ , 73.79), 130 (100); HRMS Calcd for  $\text{C}_{18}\text{H}_{17}\text{NO}$  ( $\text{M}^+$ ): 263.1310, Found: 263.1312.

**(3) (S)-2-(4-Methylphenyl)-5-(1-phenylvinyl)-4,5-dihydrooxazole ((S)-3ca) (Table 3) (lhw-13-172)**

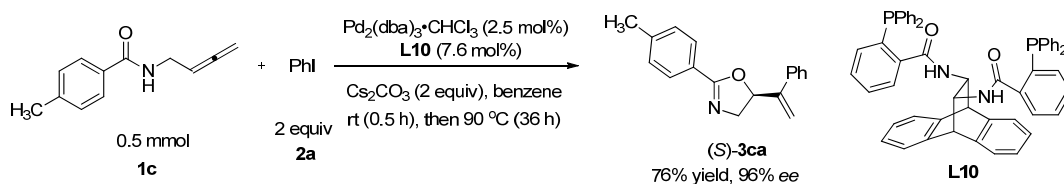

The reaction of  $\text{Pd}_2(\text{dba})_3 \cdot \text{CHCl}_3$  (13.0 mg, 0.0126 mmol), **L10** (30.7 mg, 0.0378 mmol),  $\text{Cs}_2\text{CO}_3$  (325.9 mg, 1.0 mmol), **1c** (94.3 mg, 0.5 mmol), and **2a** (203.9 mg, 1.0

mmol) in benzene (6.0 mL) afforded (*S*)-**3ca** (100.7 mg, 76%) (eluent: petroleum ether (b.p. 30-60 °C)/ethyl acetate = 20/1 to 10/1) as a solid: M.P. 86-88 °C (petroleum ether/ethyl acetate); 96% *ee* (HPLC conditions: OZ-H column, hexane/*i*-PrOH = 95/5, 1.0 mL/min,  $\lambda$  = 214 nm,  $t_R$  (minor) = 19.4 min,  $t_R$  (major) = 14.3 min);  $[\alpha]_D^{20}$  = +202.2 ( $c$  = 1.00, CHCl<sub>3</sub>); <sup>1</sup>H NMR (400 MHz, CDCl<sub>3</sub>)  $\delta$  = 7.91 (d,  $J$  = 8.0 Hz, 2 H, Ar-H), 7.41-7.28 (m, 5 H, Ar-H), 7.28-7.21 (m, 2 H, Ar-H), 5.63-5.55 (m, 1 H, OCH), 5.45 (s, 1 H, one proton in =CH<sub>2</sub>), 5.41 (s, 1 H, one proton in =CH<sub>2</sub>), 4.27 (dd,  $J_1$  = 14.6 Hz,  $J_2$  = 10.2 Hz, 1 H, one proton in NCH<sub>2</sub>), 3.78 (dd,  $J_1$  = 14.4 Hz,  $J_2$  = 7.6 Hz, 1 H, one proton in NCH<sub>2</sub>), 2.41 (s, 3 H, CH<sub>3</sub>); <sup>13</sup>C NMR (100 MHz, CDCl<sub>3</sub>)  $\delta$  = 163.9, 146.9, 141.8, 138.0, 129.1, 128.6, 128.14, 128.06, 126.6, 124.8, 112.4, 79.9, 61.0, 21.6; IR (neat, cm<sup>-1</sup>): 1648, 1328, 1255, 1177, 1076; MS (70 eV, EI)  $m/z$  (%): 264 (M<sup>+</sup>+1, 6.56), 263 (M<sup>+</sup>, 32.94), 131 (100); Anal. Calcd for C<sub>18</sub>H<sub>17</sub>NO: C 82.10, H 6.51, N 5.32; Found: C 82.09, H 6.45, N 5.19.

**(4) (*S*)-2-(4-Methoxyphenyl)-5-(1-phenylvinyl)-4,5-dihydrooxazole ((*S*)-**3da**)**  
**(Table 3) (lhw-13-177)**

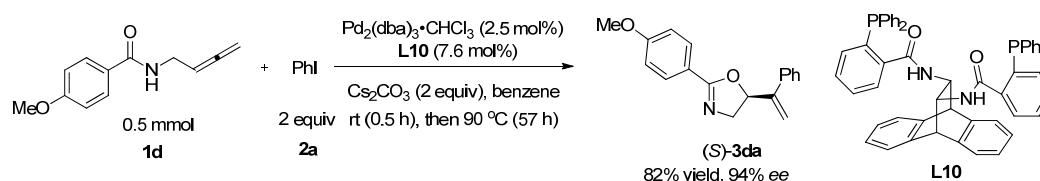

The reaction of Pd<sub>2</sub>(dba)<sub>3</sub>·CHCl<sub>3</sub> (12.8 mg, 0.0124 mmol), **L10** (30.9 mg, 0.0380 mmol), Cs<sub>2</sub>CO<sub>3</sub> (325.8 mg, 1.0 mmol), **1d** (101.8 mg, 0.5 mmol), and **2a** (208.8 mg, 1.0 mmol) in benzene (6.0 mL) afforded (*S*)-**3da** (115.3 mg, 82%) (eluent: petroleum ether (b.p. 60-90 °C)/ethyl acetate = 10/1 to 5/1) as a solid: M.P. 85-86 °C (petroleum ether/ethyl acetate); 94% *ee* (HPLC conditions: PC-2 column, hexane/*i*-PrOH = 80/20, 1.0 mL/min,  $\lambda$  = 214 nm,  $t_R$  (minor) = 12.7 min,  $t_R$  (major) = 8.7 min);  $[\alpha]_D^{20}$  = +193.7 ( $c$  = 1.03, CHCl<sub>3</sub>); <sup>1</sup>H NMR (400 MHz, CDCl<sub>3</sub>)  $\delta$  = 7.99-7.93 (m, 2 H, Ar-H), 7.40-7.29 (m, 5 H, Ar-H), 6.95 (dt,  $J_1$  = 9.3 Hz,  $J_2$  = 2.4 Hz, 2 H, Ar-H), 5.62-5.55 (m, 1 H, OCH), 5.45 (s, 1 H, one proton in =CH<sub>2</sub>), 5.41 (s, 1 H, one proton in =CH<sub>2</sub>), 4.27 (dd,  $J_1$  = 14.6 Hz,  $J_2$  = 10.2 Hz, 1 H, one proton in NCH<sub>2</sub>), 3.86 (s, 3 H, OCH<sub>3</sub>), 3.77

(dd,  $J_1 = 14.4$  Hz,  $J_2 = 7.2$  Hz, 1 H, one proton in NCH<sub>2</sub>); <sup>13</sup>C NMR (100 MHz, CDCl<sub>3</sub>)  $\delta = 163.6, 162.1, 146.9, 138.0, 129.9, 128.6, 128.1, 126.5, 120.1, 113.7, 112.4, 79.9, 61.0, 55.4$ ; IR (neat, cm<sup>-1</sup>): 1651, 1510, 1248, 1168, 1075, 1027; MS (70 eV, EI)  $m/z$  (%): 280 ( $M^+ + 1$ , 7.10), 279 ( $M^+$ , 36.83), 147 (100); Anal. Calcd for C<sub>18</sub>H<sub>17</sub>NO<sub>2</sub>: C 77.40, H 6.13, N 5.01; Found: C 77.09, H 6.22, N 4.77.

**(5) (S)-2-(4-Fluorophenyl)-5-(1-phenylvinyl)-4,5-dihydrooxazole ((S)-3ea) (Table 3) (lhw-13-150)**

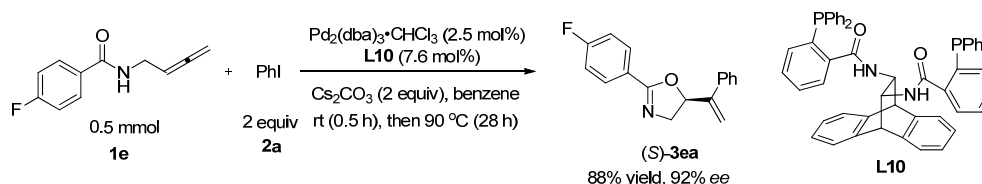

The reaction of Pd<sub>2</sub>(dba)<sub>3</sub>·CHCl<sub>3</sub> (13.0 mg, 0.0126 mmol), **L10** (31.0 mg, 0.0381 mmol), Cs<sub>2</sub>CO<sub>3</sub> (327.9 mg, 1.0 mmol), **1e** (95.1 mg, 0.5 mmol), and **2a** (206.3 mg, 1.0 mmol) in benzene (6.0 mL) afforded (*S*)-**3ea** (117.4 mg, 88%) (eluent: petroleum ether (b.p. 60-90 °C)/ethyl acetate = 15/1 to 10/1) as a liquid: 92% *ee* (HPLC conditions: OZ-H column, hexane/*i*-PrOH = 95/5, 1.0 mL/min,  $\lambda = 214$  nm,  $t_R$  (minor) = 12.9 min,  $t_R$  (major) = 11.0 min);  $[\alpha]_D^{20} = +182.4$  ( $c = 1.02$ , CHCl<sub>3</sub>); <sup>1</sup>H NMR (400 MHz, CDCl<sub>3</sub>)  $\delta = 8.05-7.98$  (m, 2 H, Ar-H), 7.40-7.29 (m, 5 H, Ar-H), 7.12 (t,  $J = 8.6$  Hz, 2 H, Ar-H), 5.61 (t,  $J = 9.2$  Hz, 1 H, OCH), 5.46 (s, 1 H, one proton in =CH<sub>2</sub>), 5.40 (s, 1 H, one proton in =CH<sub>2</sub>), 4.28 (dd,  $J_1 = 14.4$  Hz,  $J_2 = 10.0$  Hz, 1 H, one proton in NCH<sub>2</sub>), 3.79 (dd,  $J_1 = 14.6$  Hz,  $J_2 = 8.2$  Hz, 1 H, one proton in NCH<sub>2</sub>); <sup>13</sup>C NMR (100 MHz, CDCl<sub>3</sub>)  $\delta = 164.7$  (d,  $J = 250.4$  Hz), 162.9, 146.7, 137.8, 130.4 (d,  $J = 9.4$  Hz), 128.6, 128.1, 126.5, 123.9 (d,  $J = 3.3$  Hz), 115.6 (d,  $J = 22.0$  Hz), 112.5, 80.2, 61.0; <sup>19</sup>F NMR (376 MHz, CDCl<sub>3</sub>) -108.53; IR (neat, cm<sup>-1</sup>): 1652, 1605, 1508, 1224, 1153, 1068; MS (70 eV, EI)  $m/z$  (%): 268 ( $M^+ + 1$ , 6.47), 267 ( $M^+$ , 32.98), 135 (100); HRMS Calcd for C<sub>17</sub>H<sub>14</sub>NOF ( $M^+$ ): 267.1059, Found: 267.1061.

**(6) (S)-2-(4-Chlorophenyl)-5-(1-phenylvinyl)-4,5-dihydrooxazole ((S)-3fa) (Table 3) (lhw-13-151)**

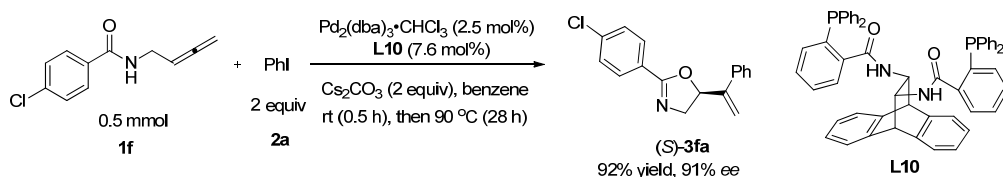

The reaction of  $\text{Pd}_2(\text{dba})_3 \cdot \text{CHCl}_3$  (12.9 mg, 0.0125 mmol), **L10** (31.0 mg, 0.0381 mmol),  $\text{Cs}_2\text{CO}_3$  (325.9 mg, 1.0 mmol), **1f** (104.7 mg, 0.5 mmol), and **2a** (205.5 mg, 1.0 mmol) in benzene (6.0 mL) afforded (*S*)-**3fa** (132.3 mg, 92%) (eluent: petroleum ether (b.p. 60-90 °C)/ethyl acetate = 15/1 to 10/1) as a solid: M.P. 86-87 °C (petroleum ether/ethyl acetate); 91% *ee* (HPLC conditions: OJ-H column, hexane/*i*-PrOH = 100/1, 1.0 mL/min,  $\lambda = 214$  nm,  $t_R$  (minor) = 27.7 min,  $t_R$  (major) = 22.9 min);  $[\alpha]_D^{20} = +185.3$  ( $c = 1.02$ ,  $\text{CHCl}_3$ );  $^1\text{H}$  NMR (400 MHz,  $\text{CDCl}_3$ )  $\delta = 7.95$  (d,  $J = 8.0$  Hz, 2 H, Ar-H), 7.42 (d,  $J = 8.0$  Hz, 2 H, Ar-H), 7.39-7.28 (m, 5 H, Ar-H), 5.61 (t,  $J = 9.0$  Hz, 1 H, OCH), 5.46 (s, 1 H, one proton in  $=\text{CH}_2$ ), 5.40 (s, 1 H, one proton in  $=\text{CH}_2$ ), 4.28 (dd,  $J_1 = 14.6$  Hz,  $J_2 = 10.2$  Hz, 1 H, one proton in  $\text{NCH}_2$ ), 3.79 (dd,  $J_1 = 14.6$  Hz,  $J_2 = 7.4$  Hz, 1 H, one proton in  $\text{NCH}_2$ );  $^{13}\text{C}$  NMR (100 MHz,  $\text{CDCl}_3$ )  $\delta = 163.0$ , 146.6, 137.8, 137.6, 129.5, 128.7, 128.6, 128.1, 126.5, 126.1, 112.6, 80.3, 61.0; IR (neat,  $\text{cm}^{-1}$ ): 1657, 1487, 1329, 1258, 1086, 1067, 1011; MS (70 eV, EI)  $m/z$  (%): 286 ( $\text{M}^+(\text{}^{37}\text{Cl})+1$ , 2.29), 285 ( $\text{M}^+(\text{}^{37}\text{Cl})$ , 9.49), 284 ( $\text{M}^+(\text{}^{35}\text{Cl})+1$ , 5.77), 283 ( $\text{M}^+(\text{}^{35}\text{Cl})$ , 29.46), 149 (100); Anal. Calcd for  $\text{C}_{17}\text{H}_{14}\text{ClNO}$ : C 71.96, H 4.97, N 4.94; Found: C 71.69, H 4.89, N 4.64.

**(7) (*S*)-2-(4-Bromophenyl)-5-(1-phenylvinyl)-4,5-dihydrooxazole ((*S*)-3ga) (Table 3) (lhw-14-188)**

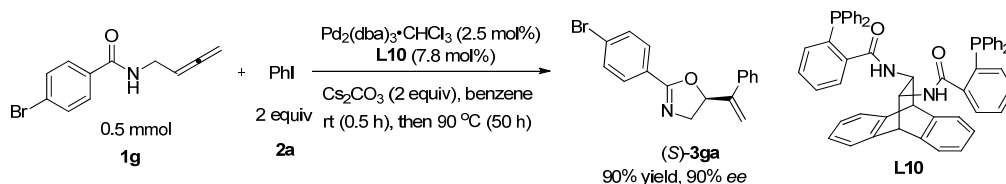

The reaction of  $\text{Pd}_2(\text{dba})_3 \cdot \text{CHCl}_3$  (12.9 mg, 0.0125 mmol), **L10** (31.6 mg, 0.0389 mmol),  $\text{Cs}_2\text{CO}_3$  (329.5 mg, 1.0 mmol), **1g** (125.6 mg, 0.5 mmol), and **2a** (211.2 mg, 1.0 mmol) in benzene (6.0 mL) afforded (*S*)-**3ga** (146.5 mg, 90%) (eluent: petroleum ether (b.p. 60-90 °C)/ethyl acetate = 15/1 to 5/1) as a solid: M.P. 98-100 °C (petroleum



ether/ethyl acetate); 90% *ee* (HPLC conditions: OZ-H column, hexane/*i*-PrOH = 90/10, 0.7 mL/min,  $\lambda = 214$  nm,  $t_R$  (minor) = 8.8 min,  $t_R$  (major) = 7.3 min);  $[\alpha]_D^{20} = +151.2$  ( $c = 1.02$ , CHCl<sub>3</sub>); <sup>1</sup>H NMR (400 MHz, CDCl<sub>3</sub>)  $\delta = 7.87$  (d,  $J = 8.8$  Hz, 2 H, Ar-H), 7.58 (d,  $J = 8.8$  Hz, 2 H, Ar-H), 7.40-7.28 (m, 5 H, Ar-H), 5.60 (t,  $J = 9.0$  Hz, 1 H, OCH), 5.45 (s, 1 H, one proton in =CH<sub>2</sub>), 5.39 (s, 1 H, one proton in =CH<sub>2</sub>), 4.27 (dd,  $J_1 = 14.6$  Hz,  $J_2 = 10.2$  Hz, 1 H, one proton in NCH<sub>2</sub>), 3.79 (dd,  $J_1 = 14.8$  Hz,  $J_2 = 7.6$  Hz, 1 H, one proton in NCH<sub>2</sub>); <sup>13</sup>C NMR (100 MHz, CDCl<sub>3</sub>)  $\delta = 163.0$ , 146.6, 137.8, 131.7, 129.7, 128.6, 128.1, 126.5, 126.1, 112.6, 80.3, 61.0; IR (neat, cm<sup>-1</sup>): 1657, 1589, 1500, 1258, 1070, 1007; MS (70 eV, EI)  $m/z$  (%): 330 (M<sup>+</sup>(<sup>81</sup>Br)+1, 5.09), 329 (M<sup>+</sup>(<sup>81</sup>Br), 28.76), 328 (M<sup>+</sup>(<sup>79</sup>Br)+1, 6.97), 327 (M<sup>+</sup>(<sup>79</sup>Br), 27.96), 195 (100); Anal. Calcd for C<sub>17</sub>H<sub>14</sub>BrNO: C 62.21, H 4.30, N 4.27; Found: C 62.26, H 4.30, N 4.11.

**(8) (*S,E*)-5-(1-Phenylvinyl)-2-styryl-4,5-dihydrooxazole ((*S,E*)-3ha) (Table 3) (lhw-13-155)**

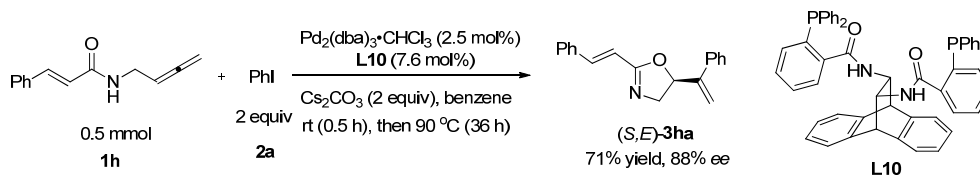

The reaction of Pd<sub>2</sub>(dba)<sub>3</sub>·CHCl<sub>3</sub> (12.9 mg, 0.0125 mmol), **L10** (30.8 mg, 0.0379 mmol), Cs<sub>2</sub>CO<sub>3</sub> (326.1 mg, 1.0 mmol), **1h** (99.9 mg, 0.5 mmol), and **2a** (202.7 mg, 1.0 mmol) in benzene (6.0 mL) afforded (*S,E*)-3ha (98.1 mg, 71%) (eluent: petroleum ether (b.p. 60-90 °C)/ethyl acetate = 10/1) as a solid: M.P. 85-87 °C (petroleum ether/ethyl acetate); 88% *ee* (HPLC conditions: OZ-H column, hexane/*i*-PrOH = 95/5, 1.0 mL/min,  $\lambda = 214$  nm,  $t_R$  (minor) = 21.9 min,  $t_R$  (major) = 17.9 min);  $[\alpha]_D^{20} = +217.7$  ( $c = 1.00$ , CHCl<sub>3</sub>); <sup>1</sup>H NMR (400 MHz, CDCl<sub>3</sub>)  $\delta = 7.55$ -7.48 (m, 3 H, Ar-H and =CH), 7.43-7.28 (m, 8 H, Ar-H), 6.69 (d,  $J = 16.0$  Hz, 1 H, =CH), 5.52 (t,  $J = 9.0$  Hz, 1 H, OCH), 5.46 (s, 1 H, one proton in =CH<sub>2</sub>), 5.42 (s, 1 H, one proton in =CH<sub>2</sub>), 4.23 (dd,  $J_1 = 15.0$  Hz,  $J_2 = 10.2$  Hz, 1 H, one proton in NCH<sub>2</sub>), 3.73 (dd,  $J_1 = 15.2$  Hz,  $J_2 = 7.6$  Hz, 1 H, one proton in NCH<sub>2</sub>); <sup>13</sup>C NMR (100 MHz, CDCl<sub>3</sub>)  $\delta = 163.7$ , 146.8,

140.0, 137.9, 135.1, 129.5, 128.8, 128.6, 128.1, 127.5, 126.5, 115.1, 112.6, 79.8, 61.0; IR (neat,  $\text{cm}^{-1}$ ): 1648, 1604, 1448, 1342, 1250; MS (70 eV, EI)  $m/z$  (%): 276 ( $M^+ + 1$ , 5.97), 275 ( $M^+$ , 33.53), 115 (100); Anal. Calcd for  $\text{C}_{19}\text{H}_{17}\text{NO}$ : C 82.88, H 6.22, N 5.09; Found: C 82.52, H 6.18, N 4.68.

**(9) (S)-5-(1-Phenylvinyl)-2-(thiophen-2-yl)-4,5-dihydrooxazole ((S)-3ia) (Table 3) (lhw-14-182)**

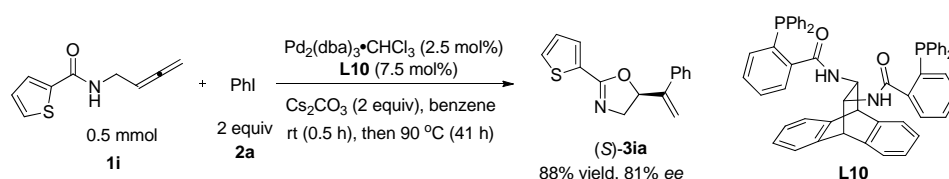

The reaction of  $\text{Pd}_2(\text{dba})_3 \cdot \text{CHCl}_3$  (12.9 mg, 0.0125 mmol), **L10** (30.6 mg, 0.0376 mmol),  $\text{Cs}_2\text{CO}_3$  (326.6 mg, 1.0 mmol), **1i** (89.0 mg, 0.5 mmol), and **2a** (204.7 mg, 1.0 mmol) in benzene (6.0 mL) afforded (*S*)-**3ia** (112.0 mg, 88%) (eluent: petroleum ether (b.p. 60-90 °C)/ethyl acetate = 15/1 to 5/1) as a liquid: 81% *ee* (HPLC conditions: OZ-H column, hexane/*i*-PrOH = 90/10, 1.0 mL/min,  $\lambda = 214$  nm,  $t_R$  (minor) = 8.0 min,  $t_R$  (major) = 6.0 min);  $[\alpha]_D^{20} = +207.8$  ( $c = 1.00$ ,  $\text{CHCl}_3$ );  $^1\text{H}$  NMR (400 MHz,  $\text{CDCl}_3$ )  $\delta = 7.70$ - $7.67$  (m, 1 H, Ar-H), 7.47 (d,  $J = 4.8$  Hz, 1 H, Ar-H), 7.39-7.28 (m, 5 H, Ar-H), 7.10 (t,  $J = 4.0$  Hz, 1 H, Ar-H), 5.63-5.56 (m, 1 H, OCH), 5.46 (s, 1 H, one proton in  $=\text{CH}_2$ ), 5.43 (s, 1 H, one proton in  $=\text{CH}_2$ ), 4.26 (dd,  $J_1 = 14.2$  Hz,  $J_2 = 10.2$  Hz, 1 H, one proton in  $\text{NCH}_2$ ), 3.77 (dd,  $J_1 = 14.6$  Hz,  $J_2 = 7.4$  Hz, 1 H, one proton in  $\text{NCH}_2$ );  $^{13}\text{C}$  NMR (100 MHz,  $\text{CDCl}_3$ )  $\delta = 159.6$ , 146.5, 137.8, 130.25, 130.22, 129.9, 128.6, 128.1, 127.6, 126.5, 112.6, 80.5, 61.0; IR (neat,  $\text{cm}^{-1}$ ): 1650, 1432, 1249, 1058, 1014; MS (70 eV, EI)  $m/z$  (%): 256 ( $M^+ + 1$ , 6.22), 255 ( $M^+$ , 35.80), 123 (100); HRMS Calcd for  $\text{C}_{15}\text{H}_{13}\text{NOS}$  ( $M^+$ ): 255.0718, Found: 255.0717.

**(10) (S)-5-(1-(3-Methylphenyl)vinyl)-2-phenyl-4,5-dihydrooxazole ((S)-3ab) (Table 3) (lhw-13-161)**

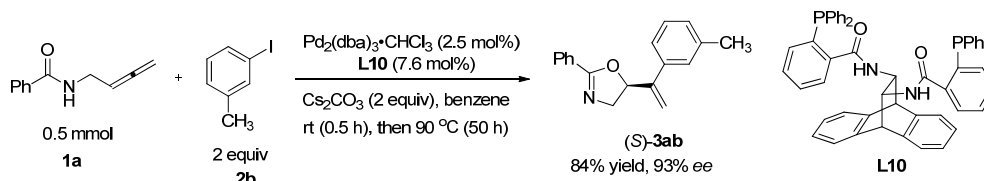

The reaction of  $\text{Pd}_2(\text{dba})_3 \cdot \text{CHCl}_3$  (12.8 mg, 0.0124 mmol), **L10** (30.7 mg, 0.0378 mmol),  $\text{Cs}_2\text{CO}_3$  (326.8 mg, 1.0 mmol), **1a** (86.8 mg, 0.5 mmol), and **2b** (97% purity, 225.5 mg, 1.0 mmol) in benzene (6.0 mL) afforded (*S*)-**3ab** (110.7 mg, 84%) (eluent: petroleum ether (b.p. 30-60 °C)/ethyl acetate = 15/1 to 10/1) as a liquid: 93% *ee* (HPLC conditions: AD-H column, hexane/*i*-PrOH = 100/1, 1.0 mL/min,  $\lambda = 214$  nm,  $t_R$  (minor) = 25.4 min,  $t_R$  (major) = 22.9 min);  $[\alpha]_D^{20} = +193.2$  ( $c = 1.04$ ,  $\text{CHCl}_3$ );  $^1\text{H}$  NMR (400 MHz,  $\text{CDCl}_3$ )  $\delta = 8.05$ - $7.99$  (m, 2 H, Ar-H),  $7.54$ - $7.47$  (m, 1 H, Ar-H),  $7.47$ - $7.40$  (m, 2 H, Ar-H),  $7.27$ - $7.21$  (m, 1 H, Ar-H),  $7.21$ - $7.11$  (m, 3 H, Ar-H),  $5.64$ - $5.56$  (m, 1 H, OCH),  $5.43$  (s, 1 H, one proton in  $=\text{CH}_2$ ),  $5.40$  (s, 1 H, one proton in  $=\text{CH}_2$ ),  $4.28$  (dd,  $J_1 = 14.6$  Hz,  $J_2 = 10.2$  Hz, 1 H, one proton in  $\text{NCH}_2$ ),  $3.79$  (dd,  $J_1 = 14.6$  Hz,  $J_2 = 7.8$  Hz, 1 H, one proton in  $\text{NCH}_2$ ),  $2.35$  (s, 3 H,  $\text{CH}_3$ );  $^{13}\text{C}$  NMR (100 MHz,  $\text{CDCl}_3$ )  $\delta = 163.8$ ,  $146.9$ ,  $138.2$ ,  $137.9$ ,  $131.4$ ,  $128.8$ ,  $128.5$ ,  $128.4$ ,  $128.2$ ,  $127.7$ ,  $127.3$ ,  $123.6$ ,  $112.0$ ,  $80.0$ ,  $61.1$ ,  $24.5$ ; IR (neat,  $\text{cm}^{-1}$ ): 1651, 1331, 1256, 1061, 1025; MS (70 eV, EI)  $m/z$  (%): 264 ( $\text{M}^+ + 1$ , 6.96), 263 ( $\text{M}^+$ , 34.11), 117 (100); HRMS Calcd for  $\text{C}_{18}\text{H}_{17}\text{NO}$  ( $\text{M}^+$ ): 263.1310, Found: 263.1308.

**(11) (*S*)-5-(1-(3,5-Dimethylphenyl)vinyl)-2-phenyl-4,5-dihydrooxazole ((*S*)-**3ac**) (Table 3) (lhw-13-179)**

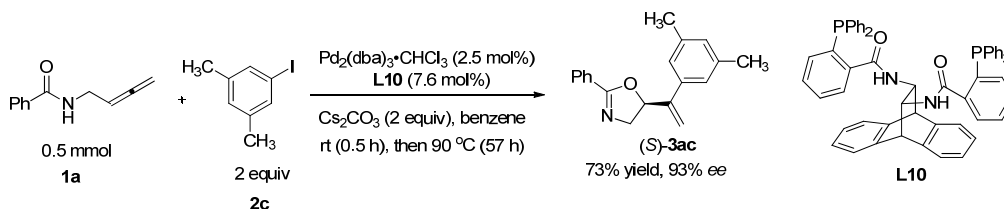

The reaction of  $\text{Pd}_2(\text{dba})_3 \cdot \text{CHCl}_3$  (12.8 mg, 0.0124 mmol), **L10** (30.7 mg, 0.0378 mmol),  $\text{Cs}_2\text{CO}_3$  (327.6 mg, 1.0 mmol), **1a** (86.3 mg, 0.5 mmol), and **2c** (239.2 mg, 1.0 mmol) in benzene (6.0 mL) afforded (*S*)-**3ac** (100.7 mg, 73%) (eluent: petroleum ether (b.p. 60-90 °C)/ethyl acetate = 30/1 to 20/1) as a liquid: 93% *ee* (HPLC

conditions: OZ-H column, hexane/*i*-PrOH = 90/10, 1.0 mL/min,  $\lambda = 214$  nm,  $t_R$  (minor) = 10.9 min,  $t_R$  (major) = 9.5 min);  $[\alpha]_D^{20} = +175.2$  ( $c = 1.01$ ,  $\text{CHCl}_3$ );  $^1\text{H}$  NMR (400 MHz,  $\text{CDCl}_3$ )  $\delta = 8.05$ - $8.00$  (m, 2 H, Ar-H),  $7.53$ - $7.47$  (m, 1 H, Ar-H),  $7.47$ - $7.40$  (m, 2 H, Ar-H),  $7.00$ - $6.94$  (m, 3 H, Ar-H),  $5.63$ - $5.56$  (m, 1 H, OCH),  $5.40$  (s, 1 H, one proton in =CH<sub>2</sub>),  $5.37$  (s, 1 H, one proton in =CH<sub>2</sub>),  $4.27$  (dd,  $J_1 = 14.6$  Hz,  $J_2 = 10.2$  Hz, 1 H, one proton in NCH<sub>2</sub>),  $3.78$  (dd,  $J_1 = 15.0$  Hz,  $J_2 = 7.4$  Hz, 1 H, one proton in NCH<sub>2</sub>),  $2.31$  (s, 6 H, CH<sub>3</sub> × 2);  $^{13}\text{C}$  NMR (100 MHz,  $\text{CDCl}_3$ )  $\delta = 163.8$ ,  $147.1$ ,  $138.1$ ,  $137.9$ ,  $131.4$ ,  $129.7$ ,  $128.4$ ,  $128.1$ ,  $127.7$ ,  $124.4$ ,  $111.7$ ,  $79.9$ ,  $61.1$ ,  $21.3$ ; IR (neat,  $\text{cm}^{-1}$ ):  $1651$ ,  $1331$ ,  $1256$ ,  $1061$ ,  $1025$ ; MS (70 eV, EI)  $m/z$  (%):  $278$  ( $\text{M}^+ + 1$ , 6.81),  $277$  ( $\text{M}^+$ , 30.61),  $117$  (100); HRMS Calcd for  $\text{C}_{19}\text{H}_{19}\text{NO}$  ( $\text{M}^+$ ):  $277.1467$ , Found:  $277.1468$ .

**(12) (S)-5-(1-(4-Isopropylphenyl)vinyl)-2-phenyl-4,5-dihydrooxazole ((S)-3ad)**

**(Table 3) (lhw-13-162)**

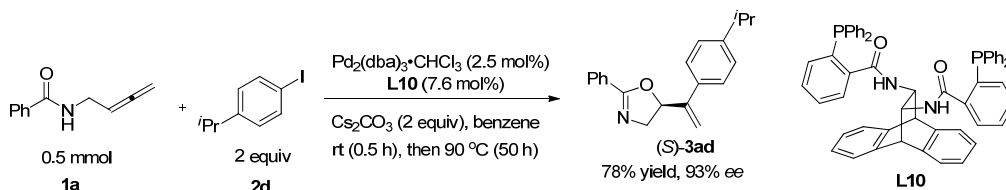

The reaction of  $\text{Pd}_2(\text{dba})_3 \cdot \text{CHCl}_3$  (12.8 mg, 0.0124 mmol), **L10** (30.7 mg, 0.0378 mmol),  $\text{Cs}_2\text{CO}_3$  (328.3 mg, 1.0 mmol), **1a** (86.2 mg, 0.5 mmol), and **2d** (97% purity, 256.5 mg, 1.0 mmol) in benzene (6.0 mL) afforded **(S)-3ad** (113.8 mg, 78%) (eluent: petroleum ether (b.p. 30-60 °C)/ethyl acetate = 15/1 to 10/1) as a liquid: 93% *ee* (HPLC conditions: OZ-H column, hexane/*i*-PrOH = 95/5, 1.0 mL/min,  $\lambda = 214$  nm,  $t_R$  (minor) = 10.6 min,  $t_R$  (major) = 9.5 min);  $[\alpha]_D^{20} = +182.3$  ( $c = 0.99$ ,  $\text{CHCl}_3$ );  $^1\text{H}$  NMR (400 MHz,  $\text{CDCl}_3$ )  $\delta = 8.05$ - $8.00$  (m, 2 H, Ar-H),  $7.54$ - $7.47$  (m, 1 H, Ar-H),  $7.47$ - $7.41$  (m, 2 H, Ar-H),  $7.31$  (d,  $J = 8.0$  Hz, 2 H, Ar-H),  $7.21$  (d,  $J = 8.4$  Hz, 2 H, Ar-H),  $5.60$  (t,  $J = 9.0$  Hz, 1 H, OCH),  $5.44$  (s, 1 H, one proton in =CH<sub>2</sub>),  $5.38$  (s, 1 H, one proton in =CH<sub>2</sub>),  $4.30$  (dd,  $J_1 = 14.8$  Hz,  $J_2 = 10.0$  Hz, 1 H, one proton in NCH<sub>2</sub>),  $3.80$  (dd,  $J_1 = 15.0$  Hz,  $J_2 = 7.8$  Hz, 1 H, one proton in NCH<sub>2</sub>),  $2.91$  (hept,  $J = 6.8$  Hz, 1 H, CH),  $1.25$  (d,  $J = 6.4$  Hz, 6 H, CH<sub>3</sub> × 2);  $^{13}\text{C}$  NMR (100 MHz,  $\text{CDCl}_3$ )  $\delta = 163.8$ ,

148.9, 146.5, 135.3, 131.4, 128.4, 128.2, 127.7, 126.7, 126.4, 111.5, 80.1, 61.2, 33.8, 23.87, 23.85; IR (neat,  $\text{cm}^{-1}$ ): 2959, 1652, 1330, 1256, 1061, 1025; MS (70 eV, EI)  $m/z$  (%): 292 ( $\text{M}^+ + 1$ , 7.15), 291 ( $\text{M}^+$ , 32.37), 117 (100); HRMS Calcd for  $\text{C}_{20}\text{H}_{21}\text{NO}$  ( $\text{M}^+$ ): 291.1623, Found: 291.1624.

**(13) (*S*)-5-(1-(Biphenyl-4-yl)vinyl)-2-phenyl-4,5-dihydrooxazole ((*S*)-3ae) (Table 3) (lhw-13-185)**

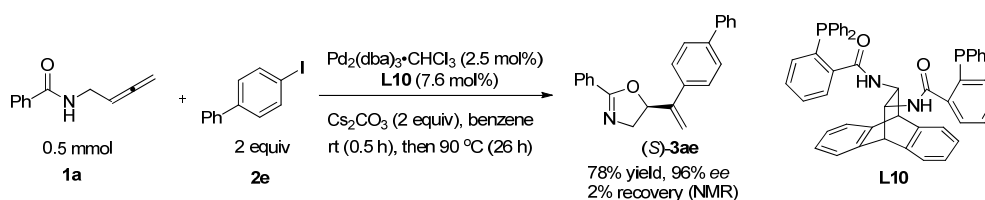

The reaction of  $\text{Pd}_2(\text{dba})_3 \cdot \text{CHCl}_3$  (12.9 mg, 0.0125 mmol), **L10** (30.7 mg, 0.0378 mmol),  $\text{Cs}_2\text{CO}_3$  (326.5 mg, 1.0 mmol), **1a** (86.2 mg, 0.5 mmol), and **2e** (97% purity, 288.5 mg, 1.0 mmol) in benzene (6.0 mL) afforded (*S*)-3ae (126.3 mg, 78%) (eluent: petroleum ether (b.p. 60-90 °C)/ethyl acetate = 15/1 to 10/1) as a solid: M.P. 134-135 °C (petroleum ether/ethyl acetate); 96% *ee* (HPLC conditions (SFC): AD-H column,  $\text{CO}_2$  (l)/*i*-PrOH = 70/30, 1.3 mL/min,  $\lambda = 214$  nm,  $t_R$  (minor) = 12.6 min,  $t_R$  (major) = 14.6 min);  $[\alpha]_D^{20} = +179.5$  ( $c = 1.00$ ,  $\text{CHCl}_3$ );  $^1\text{H}$  NMR (400 MHz,  $\text{CDCl}_3$ )  $\delta = 8.07$ - $8.01$  (m, 2 H, Ar-H),  $7.62$ - $7.55$  (m, 4 H, Ar-H),  $7.54$ - $7.40$  (m, 7 H, Ar-H),  $7.38$ - $7.31$  (m, 1 H, Ar-H),  $5.68$ - $5.60$  (m, 1 H, OCH),  $5.52$  (s, 1 H, one proton in = $\text{CH}_2$ ),  $5.45$  (s, 1 H, one proton in = $\text{CH}_2$ ),  $4.33$  (dd,  $J_1 = 15.0$  Hz,  $J_2 = 10.2$  Hz, 1 H, one proton in  $\text{NCH}_2$ ),  $3.84$  (dd,  $J_1 = 14.4$  Hz,  $J_2 = 7.6$  Hz, 1 H, one proton in  $\text{NCH}_2$ );  $^{13}\text{C}$  NMR (100 MHz,  $\text{CDCl}_3$ )  $\delta = 163.8$ , 146.3, 140.9, 140.4, 136.7, 131.4, 128.8, 128.4, 128.2, 127.6, 127.5, 127.3, 127.0, 126.9, 112.4, 80.0, 61.1; IR (neat,  $\text{cm}^{-1}$ ): 1654, 1489, 1448, 1334, 1256, 1085, 1067; MS (70 eV, EI)  $m/z$  (%): 326 ( $\text{M}^+ + 1$ , 9.72), 325 ( $\text{M}^+$ , 38.08), 117 (100); Anal. Calcd for  $\text{C}_{23}\text{H}_{19}\text{NO}$ : C 84.89, H 5.89, N 4.30; Found: C 84.93, H 5.85, N 4.25.

**(14) (*S*)-5-(1-(2-Methoxyphenyl)vinyl)-2-phenyl-4,5-dihydrooxazole ((*S*)-3af) (Table 3) (lhw-13-183)**

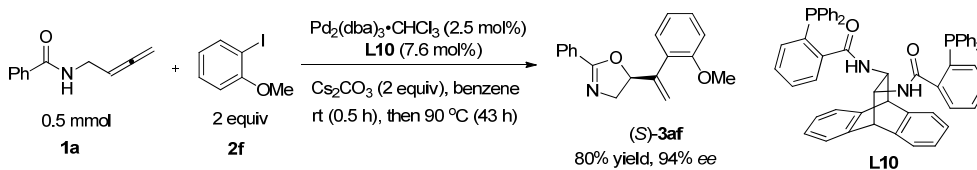

The reaction of  $\text{Pd}_2(\text{dba})_3 \cdot \text{CHCl}_3$  (12.9 mg, 0.0125 mmol), **L10** (31.0 mg, 0.0381 mmol),  $\text{Cs}_2\text{CO}_3$  (327.1 mg, 1.0 mmol), **1a** (86.4 mg, 0.5 mmol), and **2f** (235.7 mg, 1.0 mmol) in benzene (6.0 mL) afforded **(S)-3af** (110.8 mg, 80%) (eluent: petroleum ether (b.p. 60-90 °C)/ethyl acetate = 20/1 to 10/1) as a liquid: 94% *ee* (HPLC conditions: AS-H column, hexane/*i*-PrOH = 80/20, 0.5 mL/min,  $\lambda = 214$  nm,  $t_R$  (minor) = 7.9 min,  $t_R$  (major) = 7.1 min);  $[\alpha]_D^{20} = +97.8$  ( $c = 1.00$ ,  $\text{CHCl}_3$ );  $^1\text{H}$  NMR (400 MHz,  $\text{CDCl}_3$ )  $\delta = 8.04$ -7.99 (m, 2 H, Ar-H), 7.52-7.46 (m, 1 H, Ar-H), 7.46-7.39 (m, 2 H, Ar-H), 7.34-7.27 (m, 1 H, Ar-H), 7.21 (dd,  $J_1 = 7.4$  Hz,  $J_2 = 1.4$  Hz, 1 H, Ar-H), 6.95 (dd,  $J_1 = 3.6$  Hz,  $J_2 = 0.8$  Hz, 1 H, Ar-H), 6.89 (d,  $J = 8.0$  Hz, 1 H, Ar-H), 5.73-5.65 (m, 1 H, OCH), 5.49 (t,  $J = 1.4$  Hz, 1 H, one proton in =CH<sub>2</sub>), 5.22 (s, 1 H, one proton in =CH<sub>2</sub>), 4.11 (dd,  $J_1 = 14.4$  Hz,  $J_2 = 10.0$  Hz, 1 H, one proton in NCH<sub>2</sub>), 3.86-3.79 (m, 4 H, one proton in NCH<sub>2</sub> and OCH<sub>3</sub>);  $^{13}\text{C}$  NMR (100 MHz,  $\text{CDCl}_3$ )  $\delta = 163.8$ , 156.5, 147.3, 131.2, 130.7, 129.4, 128.3, 128.1, 127.8, 120.8, 113.7, 110.6, 79.7, 60.6, 55.3; IR (neat,  $\text{cm}^{-1}$ ): 1650, 1597, 1578, 1489, 1451, 1249, 1237, 1178, 1061, 1024; MS (70 eV, EI)  $m/z$  (%): 280 ( $\text{M}^+ + 1$ , 1.07), 279 ( $\text{M}^+$ , 5.66), 117 (100); HRMS Calcd for  $\text{C}_{18}\text{H}_{17}\text{NO}_2$  ( $\text{M}^+$ ): 279.1259, Found: 279.1260.

**(15) (S)-5-(1-(4-Methoxyphenyl)vinyl)-2-phenyl-4,5-dihydrooxazole ((S)-3ag)**  
**(Table 3) (lhw-13-167)**

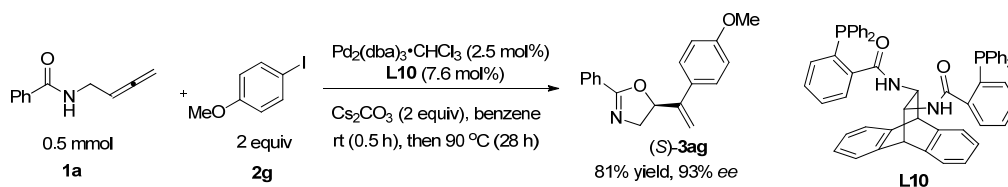

The reaction of  $\text{Pd}_2(\text{dba})_3 \cdot \text{CHCl}_3$  (12.9 mg, 0.0125 mmol), **L10** (30.9 mg, 0.0380 mmol),  $\text{Cs}_2\text{CO}_3$  (325.6 mg, 1.0 mmol), **1a** (87.6 mg, 0.5 mmol), and **2g** (234.5 mg, 1.0 mmol) in benzene (6.0 mL) afforded **(S)-3ag** (113.9 mg, 81%) (eluent: petroleum ether (b.p. 30-60 °C)/ethyl acetate = 15/1 to 10/1 to 5/1) as a solid: M.P. 87-88 °C

(petroleum ether/ethyl acetate); 93% *ee* (HPLC conditions: AS-H column, hexane/*i*-PrOH = 80/20, 0.5 mL/min,  $\lambda$  = 214 nm,  $t_R$  (minor) = 14.4 min,  $t_R$  (major) = 12.0 min);  $[\alpha]_D^{20}$  = +185.9 ( $c$  = 1.01, CHCl<sub>3</sub>); <sup>1</sup>H NMR (400 MHz, CDCl<sub>3</sub>)  $\delta$  = 8.05-7.99 (m, 2 H, Ar-H), 7.54-7.48 (m, 1 H, Ar-H), 7.47-7.41 (m, 2 H, Ar-H), 7.32 (dt,  $J_1$  = 9.5 Hz,  $J_2$  = 2.6 Hz, 2 H, Ar-H), 6.89 (dt,  $J_1$  = 9.7 Hz,  $J_2$  = 2.6 Hz, 2 H, Ar-H), 5.62-5.55 (m, 1 H, OCH), 5.38 (s, 1 H, one proton in =CH<sub>2</sub>), 5.34 (s, 1 H, one proton in =CH<sub>2</sub>), 4.29 (dd,  $J_1$  = 14.4 Hz,  $J_2$  = 10.4 Hz, 1 H, one proton in NCH<sub>2</sub>), 3.83-3.75 (m, 4 H, one proton in NCH<sub>2</sub> and OCH<sub>3</sub>); <sup>13</sup>C NMR (100 MHz, CDCl<sub>3</sub>)  $\delta$  = 163.8, 159.5, 146.1, 131.4, 130.3, 128.4, 128.2, 127.66, 127.64, 114.0, 111.0, 80.2, 61.0, 55.2; IR (neat, cm<sup>-1</sup>): 1650, 1603, 1578, 1508, 1450, 1335, 1245, 1177, 1064, 1024; MS (70 eV, EI)  $m/z$  (%): 280 (M<sup>+</sup>+1, 8.23), 279 (M<sup>+</sup>, 41.69), 117 (100); Anal. Calcd for C<sub>18</sub>H<sub>17</sub>NO<sub>2</sub>: C 77.40, H 6.13, N 5.01; Found: C 77.30, H 6.10, N 4.78.

**(16) (*S*)-5-(1-(3-Fluorophenyl)vinyl)-2-phenyl-4,5-dihydrooxazole ((*S*)-**3ah**) (Table 3) (lhw-13-166)**

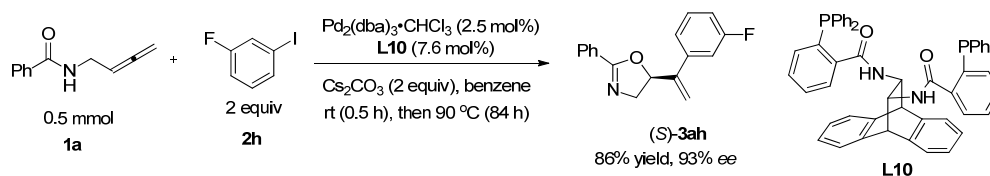

The reaction of Pd<sub>2</sub>(dba)<sub>3</sub>·CHCl<sub>3</sub> (12.8 mg, 0.0124 mmol), **L10** (30.7 mg, 0.0378 mmol), Cs<sub>2</sub>CO<sub>3</sub> (325.7 mg, 1.0 mmol), **1a** (86.9 mg, 0.5 mmol), and **2h** (97% purity, 228.6 mg, 1.0 mmol) in benzene (4.0 mL) afforded (*S*)-**3ah** (114.9 mg, 86%) (eluent: petroleum ether (b.p. 60-90 °C)/ethyl acetate = 10/1 to 5/1) as a liquid: 93% *ee* (HPLC conditions: OZ-H column, hexane/*i*-PrOH = 90/10, 1 mL/min,  $\lambda$  = 214 nm,  $t_R$  (minor) = 15.3 min,  $t_R$  (major) = 11.3 min);  $[\alpha]_D^{20}$  = +186.3 ( $c$  = 1.06, CHCl<sub>3</sub>); <sup>1</sup>H NMR (400 MHz, CDCl<sub>3</sub>)  $\delta$  = 8.04-7.98 (m, 2 H, Ar-H), 7.54-7.48 (m, 1 H, Ar-H), 7.47-7.40 (m, 2 H, Ar-H), 7.35-7.27 (m, 1 H, Ar-H), 7.17-7.12 (m, 1 H, Ar-H), 7.12-7.06 (m, 1 H, Ar-H), 7.05-6.98 (m, 1 H, Ar-H), 5.60-5.52 (m, 1 H, OCH), 5.48 (s, 1 H, one proton in =CH<sub>2</sub>), 5.46 (s, 1 H, one proton in =CH<sub>2</sub>), 4.30 (dd,  $J_1$  = 14.8 Hz,  $J_2$  = 10.4 Hz, 1 H, one proton in NCH<sub>2</sub>), 3.79 (dd,  $J_1$  = 15.0 Hz,  $J_2$  = 7.8 Hz, 1 H, one proton in NCH<sub>2</sub>);

$^{13}\text{C}$  NMR (100 MHz,  $\text{CDCl}_3$ )  $\delta$  = 163.7, 162.8 (d,  $J$  = 245.0 Hz), 145.7 (d,  $J$  = 2.1 Hz), 140.1 (d,  $J$  = 7.7 Hz), 131.5, 130.1 (d,  $J$  = 8.3 Hz), 128.4, 128.2, 127.5, 122.2 (d,  $J$  = 3.3 Hz), 115.0 (d,  $J$  = 20.0 Hz), 113.64 (d,  $J$  = 22.1 Hz), 113.63, 79.8, 60.9;  $^{19}\text{F}$  NMR (376 MHz,  $\text{CDCl}_3$ ) -113.12; IR (neat,  $\text{cm}^{-1}$ ): 1652, 1579, 1488, 1448, 1331, 1258, 1199, 1080, 1061, 1025; MS (70 eV, EI)  $m/z$  (%): 268 ( $\text{M}^+ + 1$ , 5.56), 267 ( $\text{M}^+$ , 29.68), 117 (100); HRMS Calcd for  $\text{C}_{17}\text{H}_{14}\text{NOF}$  ( $\text{M}^+$ ): 267.1059, Found: 267.1057.

**(17) (S)-5-(1-(4-Fluorophenyl)vinyl)-2-phenyl-4,5-dihydrooxazole ((S)-3ai) (Table 3) (lhw-13-159)**

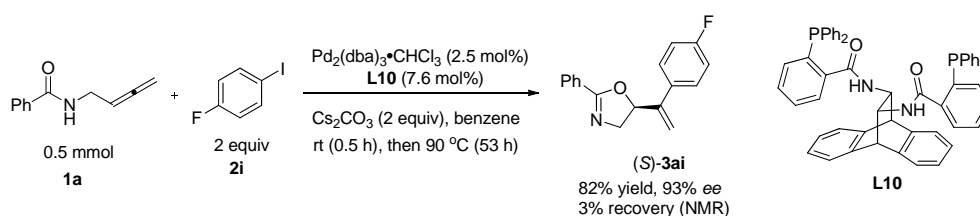

The reaction of  $\text{Pd}_2(\text{dba})_3 \cdot \text{CHCl}_3$  (12.9 mg, 0.0125 mmol), **L10** (30.7 mg, 0.0378 mmol),  $\text{Cs}_2\text{CO}_3$  (325.4 mg, 1.0 mmol), **1a** (86.0 mg, 0.5 mmol), and **2i** (228.0 mg, 1.0 mmol) in benzene (6.0 mL) afforded (*S*)-**3ai** (109.1 mg, 82%) (eluent: petroleum ether (b.p. 30-60 °C)/ethyl acetate = 10/1 to 5/1) as a liquid: 93% *ee* (HPLC conditions: OZ-H column, hexane/*i*-PrOH = 95/5, 1 mL/min,  $\lambda$  = 214 nm,  $t_R$  (minor) = 14.2 min,  $t_R$  (major) = 11.3 min);  $[\alpha]_D^{20}$  = +180.3 ( $c$  = 1.01,  $\text{CHCl}_3$ );  $^1\text{H}$  NMR (400 MHz,  $\text{CDCl}_3$ )  $\delta$  = 8.03-7.98 (m, 2 H, Ar-H), 7.54-7.48 (m, 1 H, Ar-H), 7.47-7.41 (m, 2 H, Ar-H), 7.38-7.31 (m, 2 H, Ar-H), 7.08-7.00 (m, 2 H, Ar-H), 5.59-5.52 (m, 1 H, OCH), 5.42 (s, 1 H, one proton in = $\text{CH}_2$ ), 5.40 (s, 1 H, one proton in = $\text{CH}_2$ ), 4.28 (dd,  $J_1$  = 15.2 Hz,  $J_2$  = 10.0 Hz, 1 H, one proton in  $\text{NCH}_2$ ), 3.78 (dd,  $J_1$  = 14.8 Hz,  $J_2$  = 8.0 Hz, 1 H, one proton in  $\text{NCH}_2$ );  $^{13}\text{C}$  NMR (100 MHz,  $\text{CDCl}_3$ )  $\delta$  = 163.8, 162.6 (d,  $J$  = 246.8 Hz), 145.8, 134.0 (d,  $J$  = 4.3 Hz), 131.5, 128.43, 128.36 (d,  $J$  = 7.5 Hz), 128.2, 127.5, 115.5 (d,  $J$  = 21.3 Hz), 113.0, 80.2, 60.8;  $^{19}\text{F}$  NMR (376 MHz,  $\text{CDCl}_3$ ) -114.35; IR (neat,  $\text{cm}^{-1}$ ): 1651, 1602, 1508, 1332, 1231, 1061, 1024; MS (70 eV, EI)  $m/z$  (%): 268 ( $\text{M}^+ + 1$ , 5.76), 267 ( $\text{M}^+$ , 29.37), 117 (100); HRMS Calcd for  $\text{C}_{17}\text{H}_{14}\text{NOF}$  ( $\text{M}^+$ ): 267.1059, Found: 267.1062.



**(18) (S)-5-(1-(4-Chlorophenyl)vinyl)-2-phenyl-4,5-dihydrooxazole ((S)-3aj) (Table 3) (lhw-13-160)**

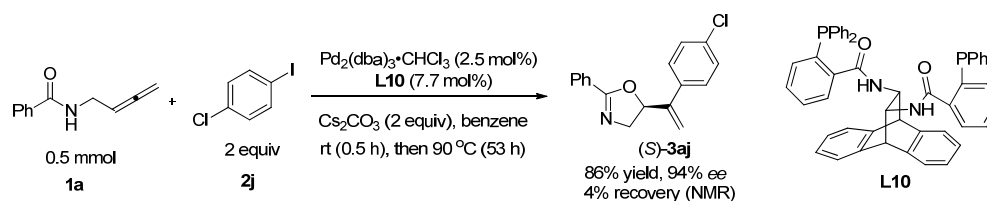

The reaction of  $\text{Pd}_2(\text{dba})_3 \cdot \text{CHCl}_3$  (13.1 mg, 0.0127 mmol), **L10** (31.1 mg, 0.0383 mmol),  $\text{Cs}_2\text{CO}_3$  (327.1 mg, 1.0 mmol), **1a** (86.5 mg, 0.5 mmol), and **2j** (98% purity, 245.4 mg, 1.0 mmol) in benzene (6.0 mL) afforded (S)-3aj (121.7 mg, 86%) (eluent: petroleum ether (b.p. 30-60 °C)/ethyl acetate = 10/1 to 5/1) as a solid: M.P. 66-67 °C (petroleum ether/ethyl acetate); 94% ee (HPLC conditions: OZ-H column, hexane/*i*-PrOH = 90/10, 1 mL/min,  $\lambda$  = 214 nm,  $t_R$  (minor) = 14.6 min,  $t_R$  (major) = 11.7 min);  $[\alpha]_D^{20}$  = +182.7 ( $c$  = 1.01,  $\text{CHCl}_3$ );  $^1\text{H}$  NMR (400 MHz,  $\text{CDCl}_3$ )  $\delta$  = 8.03-7.98 (m, 2 H, Ar-H), 7.54-7.48 (m, 1 H, Ar-H), 7.48-7.41 (m, 2 H, Ar-H), 7.35-7.28 (m, 4 H, Ar-H), 5.59-5.53 (m, 1 H, OCH), 5.44 (s, 2 H, =CH<sub>2</sub>), 4.28 (dd,  $J_1$  = 14.6 Hz,  $J_2$  = 10.6 Hz, 1 H, one proton in NCH<sub>2</sub>), 3.78 (dd,  $J_1$  = 15.0 Hz,  $J_2$  = 7.8 Hz, 1 H, one proton in NCH<sub>2</sub>);  $^{13}\text{C}$  NMR (100 MHz,  $\text{CDCl}_3$ )  $\delta$  = 163.8, 145.7, 136.3, 134.0, 131.5, 128.8, 128.4, 128.2, 127.9, 127.5, 113.4, 80.0, 60.8; IR (neat,  $\text{cm}^{-1}$ ): 1650, 1489, 1449, 1329, 1253, 1061; MS (70 eV, EI)  $m/z$  (%): 286 ( $\text{M}^+(\text{Cl})+1$ , 1.52), 285 ( $\text{M}^+(\text{Cl})$ , 7.54), 284 ( $\text{M}^+(\text{Cl})+1$ , 4.56), 283 ( $\text{M}^+(\text{Cl})$ , 23.00), 117 (100); Anal. Calcd for  $\text{C}_{17}\text{H}_{14}\text{ClNO}$ : C 71.96, H 4.97, N 4.94; Found: C 71.82, H 4.93, N 4.78.

**(19) (S)-5-(1-(3-Bromophenyl)vinyl)-2-phenyl-4,5-dihydrooxazole ((S)-3ak) (Table 3) (lhw-13-182)**

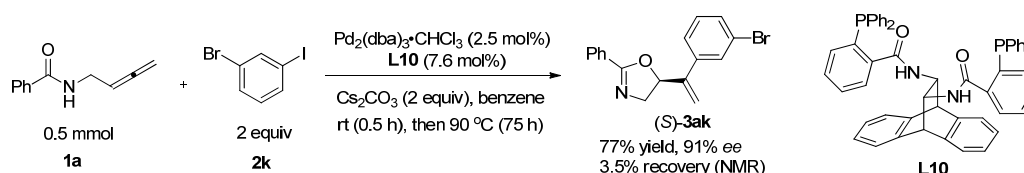

The reaction of  $\text{Pd}_2(\text{dba})_3 \cdot \text{CHCl}_3$  (13.0 mg, 0.0126 mmol), **L10** (30.8 mg, 0.0379 mmol),  $\text{Cs}_2\text{CO}_3$  (326.4 mg, 1.0 mmol), **1a** (86.7 mg, 0.5 mmol), and **2k** (288.3 mg, 1.0 mmol) in benzene (4.0 mL) afforded (S)-3ak (125.7 mg, 77%) (eluent: petroleum

ether (b.p. 60-90 °C)/ethyl acetate = 15/1 to 10/1) as a liquid: 91% *ee* (HPLC conditions: OZ-H column, hexane/*i*-PrOH = 90/10, 1 mL/min,  $\lambda$  = 214 nm,  $t_R$  (minor) = 15.8 min,  $t_R$  (major) = 11.9 min);  $[\alpha]_D^{20}$  = +155.9 ( $c$  = 1.03, CHCl<sub>3</sub>); <sup>1</sup>H NMR (400 MHz, CDCl<sub>3</sub>)  $\delta$  = 8.01 (d,  $J$  = 7.2 Hz, 2 H, Ar-H), 7.55-7.47 (m, 2 H, Ar-H), 7.47-7.40 (m, 3 H, Ar-H), 7.31-7.24 (m, 1 H, Ar-H), 7.24-7.17 (m, 1 H, Ar-H), 5.54 (t,  $J$  = 9.0 Hz, 1 H, OCH), 5.45 (s, 2 H, =CH<sub>2</sub>), 4.29 (dd,  $J_1$  = 14.2 Hz,  $J_2$  = 10.2 Hz, 1 H, one proton in NCH<sub>2</sub>), 3.78 (dd,  $J_1$  = 14.6 Hz,  $J_2$  = 7.4 Hz, 1 H, one proton in NCH<sub>2</sub>); <sup>13</sup>C NMR (100 MHz, CDCl<sub>3</sub>)  $\delta$  = 163.7, 145.7, 140.1, 131.5, 131.1, 130.1, 129.8, 128.4, 128.1, 127.4, 125.1, 122.8, 113.9, 79.7, 60.9; IR (neat, cm<sup>-1</sup>): 1651, 1557, 1331, 1257, 1061, 1024; MS (70 eV, EI)  $m/z$  (%): 330 (M<sup>+</sup>(<sup>81</sup>Br)+1, 2.50), 329 (M<sup>+</sup>(<sup>81</sup>Br), 14.03), 328 (M<sup>+</sup>(<sup>79</sup>Br)+1, 2.90), 327 (M<sup>+</sup>(<sup>79</sup>Br), 13.92), 117 (100); HRMS Calcd for C<sub>17</sub>H<sub>14</sub>NO<sup>79</sup>Br (M<sup>+</sup>): 327.0259, Found: 327.0263.

**(20) (*S*)-5-(1-(4-Bromophenyl)vinyl)-2-phenyl-4,5-dihydrooxazole ((*S*)-**3al**) (Table 3) (lhw-13-163)**

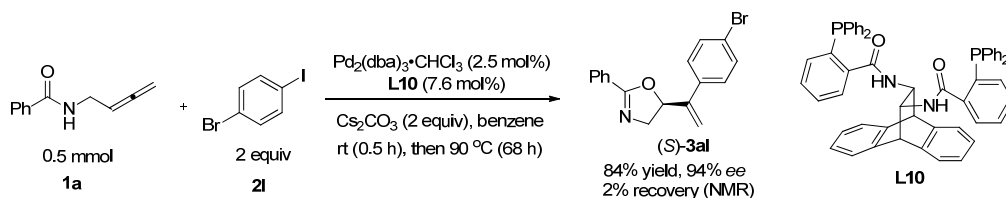

The reaction of Pd<sub>2</sub>(dba)<sub>3</sub>·CHCl<sub>3</sub> (12.9 mg, 0.0125 mmol), **L10** (30.7 mg, 0.0378 mmol), Cs<sub>2</sub>CO<sub>3</sub> (325.6 mg, 1.0 mmol), **1a** (86.7 mg, 0.5 mmol), and **2I** (98% purity, 289.1 mg, 1.0 mmol) in benzene (6.0 mL) afforded (*S*)-**3al** (137.7 mg, 84%) (eluent: petroleum ether (b.p. 30-60 °C)/ethyl acetate = 15/1 to 10/1) as a solid: M.P. 88-89 °C (petroleum ether/ethyl acetate); 94% *ee* (HPLC conditions: OZ-H column, hexane/*i*-PrOH = 90/10, 1 mL/min,  $\lambda$  = 214 nm,  $t_R$  (minor) = 13.3 min,  $t_R$  (major) = 10.8 min);  $[\alpha]_D^{20}$  = +159.9 ( $c$  = 1.03, CHCl<sub>3</sub>); <sup>1</sup>H NMR (400 MHz, CDCl<sub>3</sub>)  $\delta$  = 8.03-7.97 (m, 2 H, Ar-H), 7.54-7.41 (m, 5 H, Ar-H), 7.28-7.21 (m, 2 H, Ar-H), 5.55 (t,  $J$  = 9.0 Hz, 1 H, OCH), 5.45 (s, 2 H, =CH<sub>2</sub>), 4.28 (dd,  $J_1$  = 14.8 Hz,  $J_2$  = 10.4 Hz, 1 H, one proton in NCH<sub>2</sub>), 3.77 (dd,  $J_1$  = 14.4 Hz,  $J_2$  = 7.6 Hz, 1 H, one proton in NCH<sub>2</sub>); <sup>13</sup>C NMR (100 MHz, CDCl<sub>3</sub>)  $\delta$  = 163.8, 145.8, 136.8, 131.7, 131.5, 128.4, 128.24,

128.15, 127.5, 122.2, 113.5, 79.9, 60.8; IR (neat,  $\text{cm}^{-1}$ ): 1650, 1491, 1447, 1364, 1329, 1264, 1073, 1062, 1023, 1004; MS (70 eV, EI)  $m/z$  (%): 330 ( $\text{M}^{+}({}^{81}\text{Br})+1$ , 2.26), 329 ( $\text{M}^{+}({}^{81}\text{Br})$ , 11.30), 327 ( $\text{M}^{+}({}^{79}\text{Br})+1$ , 2.53), 327 ( $\text{M}^{+}({}^{79}\text{Br})$ , 11.02), 117 (100); Anal. Calcd for  $\text{C}_{17}\text{H}_{14}\text{BrNO}$ : C 62.21, H 4.30, N 4.27; Found: C 62.23, H 4.36, N 4.16.

**(21) (S)-5-(1-(4'-Bromo-[1,1'-biphenyl]-4-yl)vinyl)-2-phenyl-4,5-dihydrooxazole ((S)-3am) (Table 3) (lhw-14-198)**

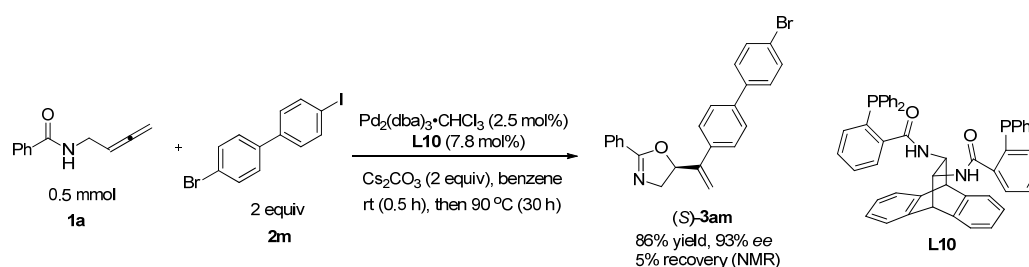

The reaction of  $\text{Pd}_2(\text{dba})_3 \cdot \text{CHCl}_3$  (13.0 mg, 0.0125 mmol), **L10** (31.6 mg, 0.0378 mmol),  $\text{Cs}_2\text{CO}_3$  (329.9 mg, 1.0 mmol), **1a** (86.9 mg, 0.5 mmol), and **2m** (358.4 mg, 1.0 mmol) in benzene (6.0 mL) afforded (S)-**3am** (175.0 mg, 86%) (eluent: petroleum ether (b.p. 60-90 °C)/ethyl acetate = 15/1 to 5/1) as a solid: M.P. 121-122 °C (petroleum ether/ethyl acetate); 93% *ee* (HPLC conditions: OZ-H column, hexane/*i*-PrOH = 90/10, 1 mL/min,  $\lambda = 214$  nm,  $t_R$  (minor) = 6.9 min,  $t_R$  (major) = 6.0 min);  $[\alpha]_D^{20} = +134.6$  ( $c = 1.00$ ,  $\text{CHCl}_3$ );  $^1\text{H}$  NMR (400 MHz,  $\text{CDCl}_3$ )  $\delta = 8.06$ -8.00 (m, 2 H, Ar-H), 7.59-7.41 (m, 11 H, Ar-H), 5.64 (t,  $J = 9.0$  Hz, 1 H, OCH), 5.52 (s, 1 H, one proton in  $=\text{CH}_2$ ), 5.46 (s, 1 H, one proton in  $=\text{CH}_2$ ), 4.33 (dd,  $J_1 = 15.0$  Hz,  $J_2 = 10.2$  Hz, 1 H, one proton in  $\text{NCH}_2$ ), 3.83 (dd,  $J_1 = 14.4$  Hz,  $J_2 = 8.0$  Hz, 1 H, one proton in  $\text{NCH}_2$ );  $^{13}\text{C}$  NMR (100 MHz,  $\text{CDCl}_3$ )  $\delta = 163.9$ , 146.2, 139.6, 139.3, 137.2, 131.9, 131.5, 128.5, 128.4, 128.2, 127.6, 127.1, 121.8, 112.8, 80.0, 61.1; IR (neat,  $\text{cm}^{-1}$ ): 1650, 1484, 1331, 1260, 1078, 1063; MS (70 eV, EI)  $m/z$  (%): 406 ( $\text{M}^{+}({}^{81}\text{Br})+1$ , 4.47), 405 ( $\text{M}^{+}({}^{81}\text{Br})$ , 17.18), 404 ( $\text{M}^{+}({}^{79}\text{Br})+1$ , 4.80), 403 ( $\text{M}^{+}({}^{79}\text{Br})$ , 16.82), 117 (100); Anal. Calcd for  $\text{C}_{23}\text{H}_{18}\text{BrNO}$ : C 68.33, H 4.49, N 3.46; Found: C 68.24, H 4.48, N 3.37.

**(22) (S)-5-(1-(4-Acetylphenyl)vinyl)-2-phenyl-4,5-dihydrooxazole ((S)-3an) (Table**

### 3) (lhw-14-20)

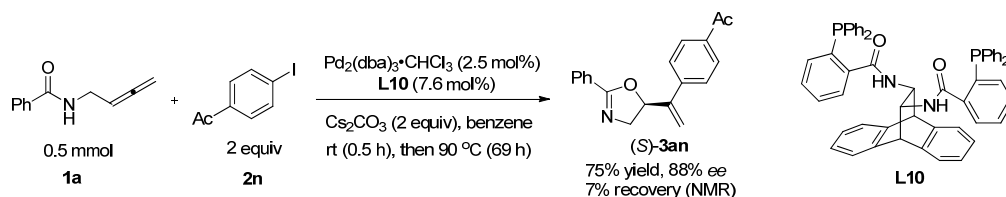

The reaction of  $\text{Pd}_2(\text{dba})_3 \cdot \text{CHCl}_3$  (12.9 mg, 0.0125 mmol), **L10** (30.9 mg, 0.0380 mmol),  $\text{Cs}_2\text{CO}_3$  (327.2 mg, 1.0 mmol), **1a** (86.3 mg, 0.5 mmol), and **2n** (98% purity, 253.2 mg, 1.0 mmol) in benzene (6.0 mL) afforded (*S*)-**3an** (108.3 mg, 75%) (eluent: petroleum ether (b.p. 60-90 °C)/ethyl acetate = 10/1 to 5/1 to 3/1) as a solid: M.P. 107-110 °C (petroleum ether/ethyl acetate); 88% *ee* (HPLC conditions: OZ-H column, hexane/*i*-PrOH = 70/30, 0.8 mL/min,  $\lambda$  = 214 nm,  $t_R$  (minor) = 17.2 min,  $t_R$  (major) = 12.9 min);  $[\alpha]_D^{20}$  = +159.3 ( $c$  = 1.00,  $\text{CHCl}_3$ );  $^1\text{H}$  NMR (400 MHz,  $\text{CDCl}_3$ )  $\delta$  = 8.04-7.98 (m, 2 H, Ar-H), 7.95 (d,  $J$  = 8.4 Hz, 2 H, Ar-H), 7.55-7.41 (m, 5 H, Ar-H), 5.66-5.58 (m, 1 H, OCH), 5.56 (s, 1 H, one proton in =CH<sub>2</sub>), 5.54 (s, 1 H, one proton in =CH<sub>2</sub>), 4.32 (dd,  $J_1$  = 14.6 Hz,  $J_2$  = 10.6 Hz, 1 H, one proton in NCH<sub>2</sub>), 3.79 (dd,  $J_1$  = 14.6 Hz,  $J_2$  = 7.8 Hz, 1 H, one proton in NCH<sub>2</sub>), 2.61 (s, 3 H, CH<sub>3</sub>);  $^{13}\text{C}$  NMR (100 MHz,  $\text{CDCl}_3$ )  $\delta$  = 197.5, 163.8, 146.0, 142.6, 136.5, 131.5, 128.7, 128.5, 128.2, 127.4, 126.8, 114.7, 79.8, 60.9, 26.6; IR (neat,  $\text{cm}^{-1}$ ): 1673, 1644, 1602, 1336, 1262, 1062; MS (70 eV, EI)  $m/z$  (%): 292 ( $\text{M}^+ + 1$ , 6.60), 291 ( $\text{M}^+$ , 30.95), 117 (100); Anal. Calcd for  $\text{C}_{19}\text{H}_{17}\text{NO}_2$ : C 78.33, H 5.88, N 4.81; Found: C 78.16, H 5.76, N 4.66.

### (23) (*S*)-5-(1-Phenylvinyl)-2-methyl-4,5-dihydrooxazole ((*S*)-**3ja**) (Scheme 5) (lwl-9-28)

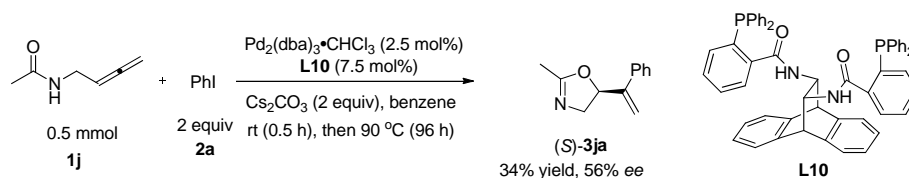

The reaction of  $\text{Pd}_2(\text{dba})_3 \cdot \text{CHCl}_3$  (12.8 mg, 0.0125 mmol), **L10** (30.7 mg, 0.0375 mmol),  $\text{Cs}_2\text{CO}_3$  (325.8 mg, 1.0 mmol), **1j** (55.5 mg, 0.5 mmol), and **2a** (204.3 mg, 1.0 mmol) in benzene (6.0 mL) afforded (*S*)-**3ja** (31.7 mg, 34%) (eluent: petroleum ether (b.p. 60-90 °C)/ethyl acetate = 3/1) as a liquid: 56% *ee* (HPLC conditions: OZ-H

column, hexane/*i*-PrOH = 98/2, 1.0 mL/min,  $\lambda$  = 214 nm,  $t_R$  (minor) = 14.7 min,  $t_R$  (major) = 12.7 min);  $[\alpha]_D^{28} = +33.6$  ( $c = 1.08$ , CHCl<sub>3</sub>); <sup>1</sup>H NMR (400 MHz, CDCl<sub>3</sub>)  $\delta$  = 7.42-7.28 (m, 5 H, Ar-H), 5.47-5.36 (m, 2 H, OCH and one proton in =CH<sub>2</sub>), 5.33 (s, 1 H, one proton in =CH<sub>2</sub>), 4.05 (dd,  $J_1 = 13.2$  Hz,  $J_2 = 11.2$  Hz, 1 H, one proton in NCH<sub>2</sub>), 3.56 (dd,  $J_1 = 13.8$  Hz,  $J_2 = 7.8$  Hz, 1 H, one proton in NCH<sub>2</sub>), 2.05 (s, 3 H, CH<sub>3</sub>); <sup>13</sup>C NMR (100 MHz, CDCl<sub>3</sub>)  $\delta$  = 164.8, 146.9, 138.0, 128.5, 128.0, 126.5, 112.2, 80.0, 60.7, 14.0; IR (neat, cm<sup>-1</sup>): 2929, 2874, 2855, 1678, 1632, 1441, 1389, 1307, 1224; MS (70 eV, EI)  $m/z$  (%): 187 (M<sup>+</sup>, 18.96), 55 (100); HRMS Calcd for C<sub>12</sub>H<sub>13</sub>NO (M<sup>+</sup>): 187.0997, Found: 187.0999.

**(24) (S)-5-(1-Phenylvinyl)-2-propyl-4,5-dihydrooxazole ((S)-3ka) (Scheme 5) (lwl-9-29)**

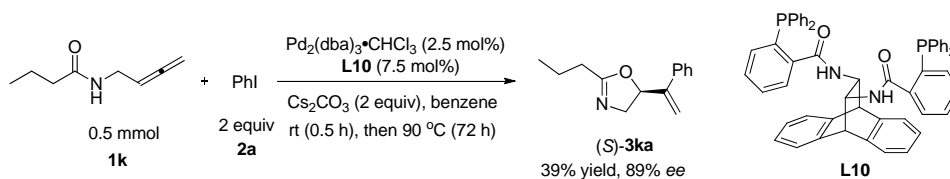

The reaction of Pd<sub>2</sub>(dba)<sub>3</sub>·CHCl<sub>3</sub> (12.9 mg, 0.0125 mmol), **L10** (30.8 mg, 0.0375 mmol), Cs<sub>2</sub>CO<sub>3</sub> (325.7 mg, 1.0 mmol), **1k** (69.7 mg, 0.5 mmol), and **2a** (204.3 mg, 1.0 mmol) in benzene (6.0 mL) afforded (S)-**3ka** (42.0 mg, 39%) (eluent: petroleum ether (b.p. 60-90 °C)/ethyl acetate = 8/1) as a liquid: 89% *ee* (HPLC conditions: OZ-H column, hexane/*i*-PrOH = 70/30, 0.6 mL/min,  $\lambda$  = 214 nm,  $t_R$  (minor) = 7.2 min,  $t_R$  (major) = 6.7 min);  $[\alpha]_D^{29} = +65.7$  ( $c = 0.93$ , CHCl<sub>3</sub>); <sup>1</sup>H NMR (400 MHz, CDCl<sub>3</sub>)  $\delta$  = 7.40-7.28 (m, 5 H, Ar-H), 5.47-5.35 (m, 2 H, OCH and one proton in =CH<sub>2</sub>), 5.33 (s, 1 H, one proton in =CH<sub>2</sub>), 4.06 (dd,  $J_1 = 14.2$  Hz,  $J_2 = 10.6$  Hz, 1 H, one proton in NCH<sub>2</sub>), 3.57 (dd,  $J_1 = 14.0$  Hz,  $J_2 = 8.0$  Hz, 1 H, one proton in NCH<sub>2</sub>), 2.33 (t,  $J = 7.6$  Hz, 2 H, CH<sub>2</sub>), 1.78-1.64 (m, 2 H, CH<sub>2</sub>), 1.00 (t,  $J = 7.4$  Hz, 3 H, CH<sub>3</sub>); <sup>13</sup>C NMR (100 MHz, CDCl<sub>3</sub>)  $\delta$  = 167.8, 147.1, 138.0, 128.5, 128.0, 126.5, 112.1, 79.7, 60.6, 30.1, 19.4, 13.8; IR (neat, cm<sup>-1</sup>): 2961, 2929, 2873, 1672, 1459, 1380, 1201, 1174; MS (70 eV, EI)  $m/z$  (%): 215 (M<sup>+</sup>, 8.25), 83 (100); HRMS Calcd for C<sub>14</sub>H<sub>17</sub>NO (M<sup>+</sup>): 215.1310, Found: 215.1305.

**(25) (*S*)-5-(1-Phenylvinyl)-2-isopropyl-4,5-dihydrooxazole ((*S*)-3la) (Scheme 5) (lwl-9-33)**

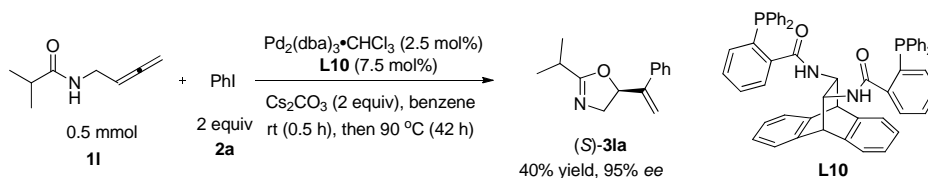

The reaction of  $\text{Pd}_2(\text{dba})_3 \cdot \text{CHCl}_3$  (12.9 mg, 0.0125 mmol), **L10** (30.7 mg, 0.0375 mmol),  $\text{Cs}_2\text{CO}_3$  (325.7 mg, 1.0 mmol), **1l** (69.7 mg, 0.5 mmol), and **2a** (204.2 mg, 1.0 mmol) in benzene (6.0 mL) afforded (*S*)-**3la** (43.0 mg, 40%) (eluent: petroleum ether (b.p. 60-90 °C)/ethyl acetate = 9/1) as a liquid: 95% *ee* (HPLC conditions: OZ-H column, hexane/*i*-PrOH = 98/2, 1.4 mL/min,  $\lambda = 214$  nm,  $t_R$  (minor) = 5.6 min,  $t_R$  (major) = 4.9 min);  $[\alpha]_D^{29} = +80.9$  ( $c = 1.01$ ,  $\text{CHCl}_3$ );  $^1\text{H NMR}$  (400 MHz,  $\text{CDCl}_3$ )  $\delta = 7.40$ - $7.28$  (m, 5 H, Ar-H),  $5.46$ - $5.35$  (m, 2 H, OCH and one proton in  $=\text{CH}_2$ ),  $5.33$  (s, 1 H, one proton in  $=\text{CH}_2$ ),  $4.06$  (dd,  $J_1 = 13.8$  Hz,  $J_2 = 10.6$  Hz, 1 H, one proton in  $\text{NCH}_2$ ),  $3.56$  (dd,  $J_1 = 14.0$  Hz,  $J_2 = 7.6$  Hz, 1 H, one proton in  $\text{NCH}_2$ ),  $2.66$  (hept,  $J = 6.9$  Hz, 1 H, CH),  $1.25$  (d,  $J = 6.8$  Hz, 6 H,  $\text{CH}_3 \times 2$ );  $^{13}\text{C NMR}$  (100 MHz,  $\text{CDCl}_3$ )  $\delta = 171.9$ ,  $147.2$ ,  $138.0$ ,  $128.5$ ,  $128.0$ ,  $126.5$ ,  $112.0$ ,  $79.6$ ,  $60.5$ ,  $28.2$ ,  $19.7$ ,  $19.6$ ; IR (neat,  $\text{cm}^{-1}$ ):  $2970$ ,  $2930$ ,  $2874$ ,  $1668$ ,  $1633$ ,  $1496$ ,  $1469$ ,  $1387$ ,  $1197$ ,  $1143$ ,  $1094$ ,  $1057$ ; MS (70 eV, EI)  $m/z$  (%):  $215$  ( $\text{M}^+$ , 15.90),  $83$  (100); HRMS Calcd for  $\text{C}_{14}\text{H}_{17}\text{NO}$  ( $\text{M}^+$ ): 215.1310, Found: 215.1303.

**(26) (*S*)-5-(1-Phenylvinyl)-2-(*tert*-butyl)-4,5-dihydrooxazole ((*S*)-3ma) (Scheme 5) (yz-5-115)**

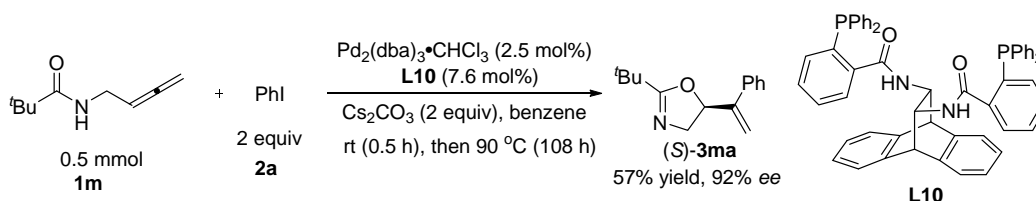

**Typical Procedure II:** After the Schlenk tube containing  $\text{Cs}_2\text{CO}_3$  (326.6 mg, 1.0 mmol) was dried for 3 minutes with a heating gun under vacuum and filled with argon,  $\text{Pd}_2(\text{dba})_3 \cdot \text{CHCl}_3$  (12.9 mg, 0.0125 mmol), (*R,R*)-ANDEN-Phenyl Trost ligand (**L10**)

(30.8 mg, 0.0379 mmol), **1m** (75.2 mg, 0.49 mmol), **2a** (205.0 mg, 1.0 mmol), and benzene (6.0 mL) were added sequentially. The resulting mixture was stirred for 0.5 h at rt and then transferred to oil bath preheated at 90 °C. When the reaction was complete as monitored by TLC, the mixture was filtrated through a short pad of silica gel with Et<sub>2</sub>O (25 mL) as eluent. After removal of the solvent under vacuum, the residue was purified by flash chromatography on silica gel to afford (*S*)-**3ma** (64.2 mg, 57%) (eluent: petroleum ether (b.p. 60-90 °C)/ethyl acetate = 5/1) as a liquid: 92% *ee* (HPLC conditions: AD-H column, hexane/*i*-PrOH = 100/1, 1.0 mL/min, λ = 214 nm, *t*<sub>R</sub> (minor) = 9.8 min, *t*<sub>R</sub> (major) = 11.8 min); [α]<sub>D</sub><sup>22</sup> = +70.1 (*c* = 1.02, CHCl<sub>3</sub>); <sup>1</sup>H NMR (400 MHz, CDCl<sub>3</sub>) δ = 7.39-7.28 (m, 5 H, Ar-H), 5.44-5.36 (m, 2 H, OCH + one proton in =CH<sub>2</sub>), 5.33 (s, 1 H, one proton in =CH<sub>2</sub>), 4.06 (dd, *J*<sub>1</sub> = 14.0 Hz, *J*<sub>2</sub> = 10.4 Hz, 1 H, one proton in NCH<sub>2</sub>), 3.57 (dd, *J*<sub>1</sub> = 14.2 Hz, *J*<sub>2</sub> = 7.8 Hz, 1 H, one proton in NCH<sub>2</sub>), 1.28 (s, 9 H, 3 × CH<sub>3</sub>); <sup>13</sup>C NMR (100 MHz, CDCl<sub>3</sub>) δ = 174.0, 147.4, 138.0, 128.5, 128.0, 126.5, 111.9, 79.7, 60.6, 33.3, 27.7; IR (neat, cm<sup>-1</sup>): 2971, 1661, 1480, 1394, 1265, 1131; MS (70 eV, EI) *m/z* (%): 229 (M<sup>+</sup>, 38.43), 97 (100); HRMS Calcd for C<sub>15</sub>H<sub>19</sub>NO (M<sup>+</sup>): 229.1467, Found: 229.1472.

The following compounds (*S*)-**3ao** to (*S*)-**3aq** were prepared according to this **Typical Procedure II**.

(27) (*S*)-5-(1-(4-Aminophenyl)vinyl)-2-phenyl-4,5-dihydrooxazole ((*S*)-**3ao**)

(Table 3) (yz-5-103)

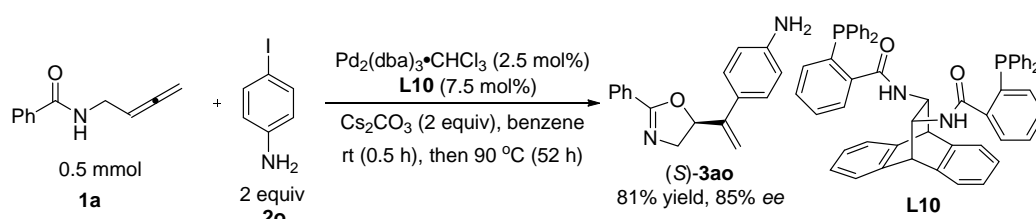

The reaction of Pd<sub>2</sub>(dba)<sub>3</sub>·CHCl<sub>3</sub> (13.0 mg, 0.0126 mmol), **L10** (30.6 mg, 0.0376 mmol), Cs<sub>2</sub>CO<sub>3</sub> (324.8 mg, 1.0 mmol), **1a** (86.8 mg, 0.5 mmol), and **2o** (218.5 mg, 1.0 mmol) in benzene (6.0 mL) afforded (*S*)-**3ao** (107.2 mg, 81%) (eluent: petroleum ether (b.p. 60-90 °C)/ethyl acetate = 2/1) as a liquid: 85% *ee* (HPLC conditions: AS-H

column, hexane/*i*-PrOH = 90/10, 1.0 mL/min,  $\lambda = 214$  nm,  $t_R$  (minor) = 22.0 min,  $t_R$  (major) = 17.0 min);  $[\alpha]_D^{24} = +173.3$  ( $c = 1.03$ , CHCl<sub>3</sub>); <sup>1</sup>H NMR (400 MHz, CDCl<sub>3</sub>)  $\delta = 8.02$  (d,  $J = 7.2$  Hz, 2 H, Ar-H), 7.53-7.47 (m, 1 H, Ar-H), 7.47-7.40 (m, 2 H, Ar-H), 7.19 (d,  $J = 8.8$  Hz, 2 H, Ar-H), 6.66 (d,  $J = 8.4$  Hz, 2 H, Ar-H), 5.61-5.53 (m, 1 H, OCH), 5.34 (s, 1 H, one proton in =CH<sub>2</sub>), 5.27 (s, 1 H, one proton in =CH<sub>2</sub>), 4.29 (dd,  $J_1 = 14.6$  Hz,  $J_2 = 10.2$  Hz, 1 H, one proton in NCH<sub>2</sub>), 3.84-3.66 (m, 3 H, NH<sub>2</sub> + one proton in NCH<sub>2</sub>); <sup>13</sup>C NMR (100 MHz, CDCl<sub>3</sub>)  $\delta = 163.8, 146.4, 146.2, 131.3, 128.4, 128.2, 127.9, 127.7, 127.4, 114.9, 109.4, 80.1, 61.2$ ; IR (neat, cm<sup>-1</sup>): 3332, 3204, 1644, 1606, 1516, 1370, 1334, 1259, 1177, 1083, 1064, 1024; MS (70 eV, EI)  $m/z$  (%): 264 (M<sup>+</sup>, 28.02), 117 (100); HRMS Calcd for C<sub>17</sub>H<sub>16</sub>N<sub>2</sub>O (M<sup>+</sup>): 264.1263, Found: 264.1265.

**(28) (S)-5-(1-(4-(Methoxycarbonyl)phenyl)vinyl)-2-phenyl-4,5-dihydrooxazole (Table 3) ((S)-3ap) (yz-5-108)**

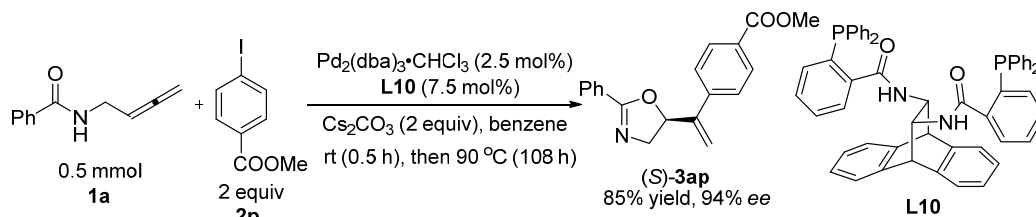

The reaction of Pd<sub>2</sub>(dba)<sub>3</sub>·CHCl<sub>3</sub> (13.1 mg, 0.0127 mmol), **L10** (30.6 mg, 0.0376 mmol), Cs<sub>2</sub>CO<sub>3</sub> (326.5 mg, 1.0 mmol), **1a** (86.9 mg, 0.5 mmol), and **2p** (261.3 mg, 1.0 mmol) in benzene (6.0 mL) afforded (*S*)-**3ap** (130.3 mg, 85%) (eluent: petroleum ether (b.p. 60-90 °C)/ethyl acetate = 3/1) as a solid: M.P. 81.7-82.6 °C (petroleum ether/ethyl acetate); 94% *ee* (HPLC conditions: OJ-H column, hexane/*i*-PrOH = 95/5, 1.0 mL/min,  $\lambda = 214$  nm,  $t_R$  (minor) = 49.0 min,  $t_R$  (major) = 53.9 min);  $[\alpha]_D^{21} = +164.4$  ( $c = 1.00$ , CHCl<sub>3</sub>); <sup>1</sup>H NMR (400 MHz, CDCl<sub>3</sub>)  $\delta = 8.05$ -7.98 (m, 4 H, Ar-H), 7.55-7.49 (m, 1 H, Ar-H), 7.48-7.41 (m, 4 H, Ar-H), 5.66-5.59 (m, 1 H, OCH), 5.56 (s, 1 H, one proton in =CH<sub>2</sub>), 5.53 (s, 1 H, one proton in =CH<sub>2</sub>), 4.31 (dd,  $J_1 = 14.6$  Hz,  $J_2 = 10.2$  Hz, 1 H, one proton in NCH<sub>2</sub>), 3.92 (s, 3 H, OCH<sub>3</sub>), 3.79 (dd,  $J_1 = 14.8$  Hz,  $J_2 = 7.6$  Hz, 1 H, one proton in NCH<sub>2</sub>); <sup>13</sup>C NMR (100 MHz, CDCl<sub>3</sub>)  $\delta = 166.6, 163.7, 146.0, 142.3, 131.5, 129.8, 129.6, 128.4, 128.1, 127.4, 126.5, 114.4, 79.7, 60.8, 52.1$ ;



IR (neat,  $\text{cm}^{-1}$ ): 1712, 1642, 1606, 1434, 1334, 1262, 1189, 1114, 1061; MS (70 eV, EI)  $m/z$  (%): 307 ( $\text{M}^+$ , 21.13), 117 (100); Anal. Calcd for  $\text{C}_{19}\text{H}_{17}\text{NO}_3$ : C 74.25, H 5.58, N 4.56; Found: C 74.26, H 5.50, N 4.43.

**(29) (S)-5-(1-(4-(Formyl)phenyl)vinyl)-2-phenyl-4,5-dihydrooxazole ((S)-3aq)**  
**(Table 3) (yz-5-111)**

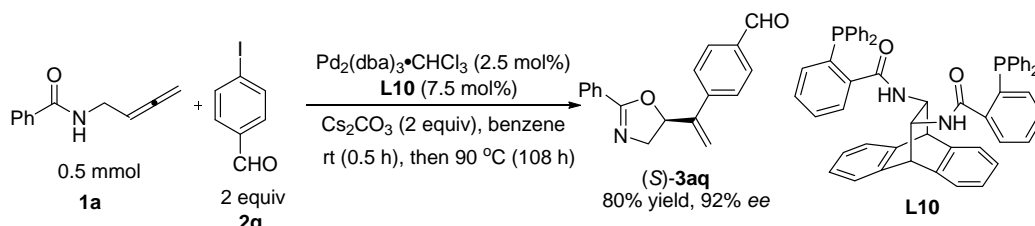

The reaction of  $\text{Pd}_2(\text{dba})_3 \cdot \text{CHCl}_3$  (13.0 mg, 0.0126 mmol), **L10** (30.6 mg, 0.0376 mmol),  $\text{Cs}_2\text{CO}_3$  (325.9 mg, 1.0 mmol), **1a** (86.7 mg, 0.5 mmol), and **2q** (232.2 mg, 1.0 mmol) in benzene (6.0 mL) afforded (*S*)-**3aq** (110.5 mg, 80%) (eluent: petroleum ether (b.p. 60-90 °C)/ethyl acetate = 3/1) as a solid: M.P. 86.0-87.5 °C (petroleum ether/ethyl acetate); 92% *ee* (HPLC conditions: AS-H column, hexane/*i*-PrOH = 95/5, 1.0 mL/min,  $\lambda = 214$  nm,  $t_R$  (minor) = 38.8 min,  $t_R$  (major) = 27.6 min);  $[\alpha]_D^{23} = +153.3$  ( $c = 1.01$ ,  $\text{CHCl}_3$ );  $^1\text{H}$  NMR (400 MHz,  $\text{CDCl}_3$ )  $\delta = 10.02$  (s, 1 H, CHO), 8.00 (d,  $J = 8.0$  Hz, 2 H, Ar-H), 7.88 (d,  $J = 7.6$  Hz, 2 H, Ar-H), 7.59-7.49 (m, 3 H, Ar-H), 7.48-7.41 (m, 2 H, Ar-H), 5.67-5.55 (m, 3 H, =CH<sub>2</sub> + OCH), 4.33 (dd,  $J_1 = 14.8$  Hz,  $J_2 = 10.0$  Hz, 1 H, one proton in NCH<sub>2</sub>), 3.81 (dd,  $J_1 = 14.8$  Hz,  $J_2 = 8.0$  Hz, 1 H, one proton in NCH<sub>2</sub>);  $^{13}\text{C}$  NMR (100 MHz,  $\text{CDCl}_3$ )  $\delta = 191.6, 163.7, 145.9, 143.9, 135.7, 131.5, 129.9, 128.4, 128.1, 127.3, 127.1, 115.3, 79.7, 60.8$ ; IR (neat,  $\text{cm}^{-1}$ ): 1699, 1649, 1601, 1332, 1262, 1174, 1080, 1062; MS (70 eV, EI)  $m/z$  (%): 277 ( $\text{M}^+$ , 19.81), 117 (100); Anal. Calcd for  $\text{C}_{18}\text{H}_{15}\text{NO}_2$ : C 77.96, H 5.45, N 5.05; Found: C 77.69, H 5.30, N 4.89.

**Synthetic Applications:**

**(1) (S)-N-(2-Hydroxy-3-(4-methoxyphenyl)but-3-en-1-yl)benzamide ((S)-4a)**  
**(Scheme 6) (lhw-15-26)<sup>[3]</sup>**

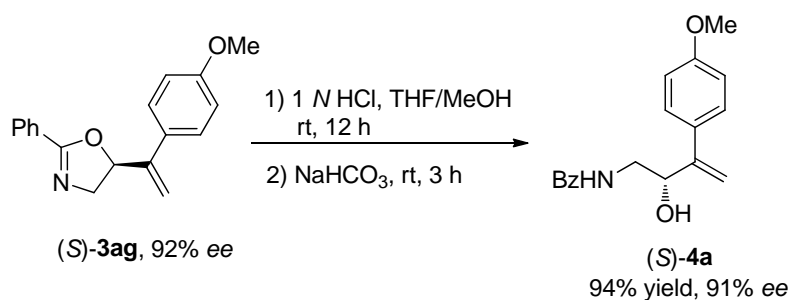

An aqueous solution of 1 N HCl (6 mL, 6.0 mmol) was added to a solution of oxazoline (*S*)-**3ag** (84.3 mg, 0.30 mmol) in THF (10 mL) and MeOH (10 mL) with stirring at room temperature and the resulting mixture was stirred for 12 h. A sat. aqueous solution of NaHCO<sub>3</sub> (25 mL) was added, and stirring was allowed to continue at room temperature for 3 h. Water (30 mL) was added and the resulting mixture was extracted with EtOAc (40 mL × 3), washed with brine (40 mL), dried with MgSO<sub>4</sub>, and evaporated in vacuo. Purification via silica gel chromatography afforded amino alcohol (*S*)-**4a** (84.3 mg, 94%) (eluent: petroleum ether (b.p. 60-90 °C)/ethyl acetate = 2/1 to 1/1) as a solid: M.P. 127.8-128.2 °C (petroleum ether/ethyl acetate); 91% *ee* (HPLC conditions: OD-H column, hexane/*i*-PrOH = 80/20, 1.0 mL/min, λ = 214 nm, *t*<sub>R</sub> (minor) = 11.2 min, *t*<sub>R</sub> (major) = 16.0 min); [α]<sub>D</sub><sup>20</sup> = +9.5 (*c* = 0.99, CHCl<sub>3</sub>); <sup>1</sup>H NMR (400 MHz, CDCl<sub>3</sub>) δ = 7.75-7.69 (m, 2 H, Ar-H), 7.52-7.46 (m, 1 H, Ar-H), 7.44-7.37 (m, 2 H, Ar-H), 7.34 (d, *J* = 8.4 Hz, 2 H, Ar-H), 6.87 (d, *J* = 8.8 Hz, 2 H, Ar-H), 6.69-6.59 (m, 1 H, NH), 5.43 (s, 1 H, one proton in =CH<sub>2</sub>), 5.35 (s, 1 H, one proton in =CH<sub>2</sub>), 4.91-4.84 (m, 1 H, OCH), 3.84-3.75 (m, 4 H, one proton in NCH<sub>2</sub> and OCH<sub>3</sub>), 3.73 (brs, 1 H, OH), 3.35-3.26 (m, 1 H, one proton in NCH<sub>2</sub>); <sup>13</sup>C NMR (100 MHz, CDCl<sub>3</sub>) δ = 168.8, 159.4, 148.2, 134.0, 131.7, 131.6, 128.6, 127.7, 126.9, 114.0, 112.4, 72.9, 55.3, 45.6; IR (neat, cm<sup>-1</sup>): 3308, 1630, 1604, 1537, 1511, 1322, 1244, 1185, 1110, 1061, 1027; MS (70 eV, EI) *m/z* (%): 298 (M<sup>+</sup>+1, 0.83), 297 (M<sup>+</sup>, 4.03), 105 (100); Anal. Calcd for C<sub>18</sub>H<sub>19</sub>NO<sub>3</sub>: C 72.71, H 6.44, N 4.71; Found: C 72.55, H 6.40, N 4.79.

(2) (*S*)-*N*-(3-(4-Bromophenyl)-2-hydroxybut-3-en-1-yl)benzamide ((*S*)-**4b**)  
(Scheme 6) (lhw-15-40)<sup>[3]</sup>

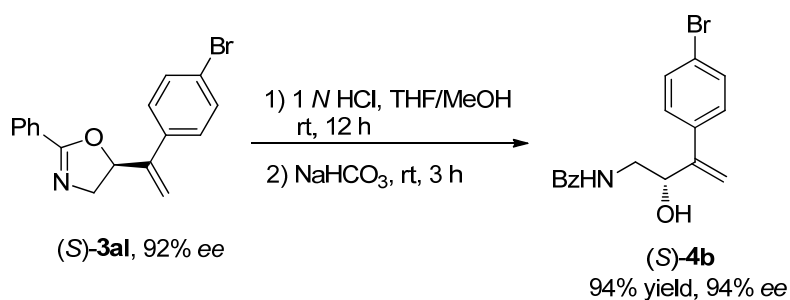

An aqueous solution of 1 N HCl (6 mL, 6.0 mmol) was added to a solution of oxazoline (*S*)-**3al** (97.7 mg, 0.30 mmol) in THF (10 mL) and MeOH (10 mL) with stirring at room temperature and the resulting mixture was stirred for 12 h. A sat. aqueous solution of NaHCO<sub>3</sub> (25 mL) was added, and stirring was allowed to continue at room temperature for 3 h. Water (30 mL) was added in the reaction mixture and the resulting mixture was extracted with EtOAc (40 mL × 3), washed with brine (40 mL), dried with MgSO<sub>4</sub>, and evaporated in vacuo. Purification via silica gel chromatography afforded amino alcohol (*S*)-**4b** (96.4 mg, 94%) (eluent: petroleum ether (b.p. 60-90 °C)/ethyl acetate = 2/1 to 3/2) as a solid: M.P. 124.3-124.9 °C (petroleum ether/ethyl acetate); 94% *ee* (HPLC conditions: OD-H column, hexane/*i*-PrOH = 80/20, 1.0 mL/min, λ = 214 nm, *t<sub>R</sub>* (minor) = 12.0 min, *t<sub>R</sub>* (major) = 14.7 min); [α]<sub>D</sub><sup>20</sup> = +15.3 (*c* = 1.01, CHCl<sub>3</sub>); <sup>1</sup>H NMR (400 MHz, CDCl<sub>3</sub>) δ = 7.70 (d, *J* = 7.6 Hz, 2 H, Ar-H), 7.54-7.35 (m, 5 H, Ar-H), 7.25 (d, *J* = 8.4 Hz, 2 H, Ar-H), 6.74-6.65 (m, 1 H, NH), 5.52 (s, 1 H, one proton in =CH<sub>2</sub>), 5.40 (s, 1 H, one proton in =CH<sub>2</sub>), 4.87-4.79 (m, 1 H, OCH), 3.99 (d, *J* = 4.0 Hz, 1 H, OH), 3.77-3.67 (m, 1 H, one proton in NCH<sub>2</sub>), 3.35-3.23 (m, 1 H, one proton in NCH<sub>2</sub>); <sup>13</sup>C NMR (100 MHz, CDCl<sub>3</sub>) δ = 168.9, 147.9, 138.1, 133.7, 131.8, 131.7, 128.6, 128.3, 126.9, 122.0, 114.5, 72.8, 45.6; IR (neat, cm<sup>-1</sup>): 3355, 1614, 1533, 1487, 1319, 1080, 1006; MS (70 eV, EI) *m/z* (%): 348 (M<sup>+</sup>(<sup>81</sup>Br)+1, 0.35), 347 (M<sup>+</sup>(<sup>81</sup>Br), 1.32), 346 (M<sup>+</sup>(<sup>79</sup>Br)+1, 0.28), 345 (M<sup>+</sup>(<sup>79</sup>Br), 1.32), 105 (100); Anal. Calcd for C<sub>17</sub>H<sub>16</sub>BrNO<sub>2</sub>: C 58.98, H 4.66, N 4.05; Found: C 59.06, H 4.73, N 3.90.

**(3) (*S*)-5-(1-(4-(5-Chloro-1*H*-indol-1-yl)phenyl)vinyl)-2-phenyl-4,5-dihydro-oxazole ((*S*)-5) (Scheme 6) (lwl-9-61)<sup>[4]</sup>**

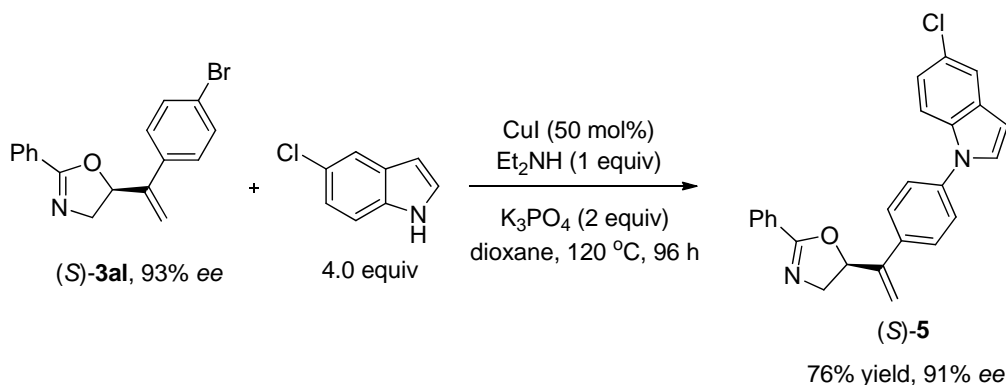

After the screw-capped reaction tube containing  $\text{K}_3\text{PO}_4$  (170.0 mg, 0.80 mmol) was dried for 3 minutes with a heating gun under vacuum and filled with argon,  $\text{CuI}$  (38.1 mg, 0.20 mmol), (S)-**3al** (130.9 mg, 0.40 mmol), and 5-chloro-1*H*-indole (242.7 mg, 1.6 mmol) were added sequentially. After replacing air with argon for three times under vacuum, diethylamine (42.0  $\mu\text{L}$ ,  $d = 0.70 \text{ g/mL}$ , 29.4 mg, 0.40 mmol) and dioxane (1.0 mL) were then added. The resulting mixture was stirred for 96 h in the oil bath of 120  $^\circ\text{C}$ . When the reaction was complete as monitored by TLC, the mixture was passed through a short pad of silica gel with a mixed solvent ( $\text{EtOAc}/\text{CH}_2\text{Cl}_2 = 1/1$ , 50 mL) as eluent. After removal of the solvent under vacuum, the residue was purified by flash chromatography on silica gel to afford (S)-**5** (121.8 mg, 76%) (eluent: petroleum ether (b.p. 60-90  $^\circ\text{C}$ )/ethyl acetate = 10/1 to  $\text{CH}_2\text{Cl}_2$ /ethyl acetate = 1000/1) as a solid: M.P. 192-193  $^\circ\text{C}$  (ethyl acetate); 91% *ee* (HPLC conditions: IE-3 column, hexane/*i*-PrOH/DEA = 90/10/0.1%, 0.7 mL/min,  $\lambda = 254 \text{ nm}$ ,  $t_R$  (minor) = 21.9 min,  $t_R$  (major) = 19.5 min);  $[\alpha]_D^{30} = +135.3$  ( $c = 1.10$ ,  $\text{CHCl}_3$ );  $^1\text{H NMR}$  (400 MHz,  $\text{CDCl}_3$ )  $\delta = 8.03$  (d,  $J = 7.6 \text{ Hz}$ , 2 H, Ar-H), 7.64 (d,  $J = 1.6 \text{ Hz}$ , 1 H, Ar-H), 7.58-7.40 (m, 8 H, Ar-H), 7.34 (d,  $J = 3.2 \text{ Hz}$ , 1 H, Ar-H), 7.17 (dd,  $J_1 = 9.2 \text{ Hz}$ ,  $J_2 = 1.2 \text{ Hz}$ , 1 H, Ar-H), 6.62 (d,  $J = 3.2 \text{ Hz}$ , 1 H, Ar-H), 5.64 (t,  $J = 9.0 \text{ Hz}$ , 1 H, OCH), 5.53 (s, 1 H, one proton in  $=\text{CH}_2$ ), 5.50 (s, 1 H, one proton in  $=\text{CH}_2$ ), 4.35 (dd,  $J_1 = 14.6 \text{ Hz}$ ,  $J_2 = 10.2 \text{ Hz}$ , 1 H, one proton in  $\text{NCH}_2$ ), 3.87 (dd,  $J_1 = 14.8 \text{ Hz}$ ,  $J_2 = 8.0 \text{ Hz}$ , 1 H, one proton in  $\text{NCH}_2$ );  $^{13}\text{C NMR}$  (100 MHz,  $\text{CDCl}_3$ )  $\delta = 163.9$ , 145.9, 139.1, 136.4, 134.1, 131.5, 130.4, 129.0, 128.5, 128.2, 128.0, 127.5, 126.1, 124.2, 122.7, 120.5, 113.6, 111.5, 103.4, 80.1, 61.0; IR (neat,  $\text{cm}^{-1}$ ): 2932, 2865, 1652, 1607, 1523, 1459, 1366, 1333, 1262, 1084, 1064, 1025; MS (70 eV, EI)  $m/z$  (%): 401 ( $\text{M}^+(\text{Cl})+1$ , 4.55), 400

( $M^+(^{37}\text{Cl})$ , 18.59), 399 ( $M^+(^{35}\text{Cl})+1$ , 16.23), 398 ( $M^+(^{35}\text{Cl})$ , 49.48), 117 (100); Anal. Calcd for  $\text{C}_{25}\text{H}_{19}\text{ClN}_2\text{O}$ : C 75.28, H 4.80, N 7.02; Found: C 75.22, H 4.92, N 6.83.

(4) **(*R*)-(4-Bromophenyl)(4,5-dihydro-2-phenyl-5-oxazolyl)methanone, ((*R*)-6)**  
**(Scheme 6) (lwl-9-40)<sup>[5]</sup>**

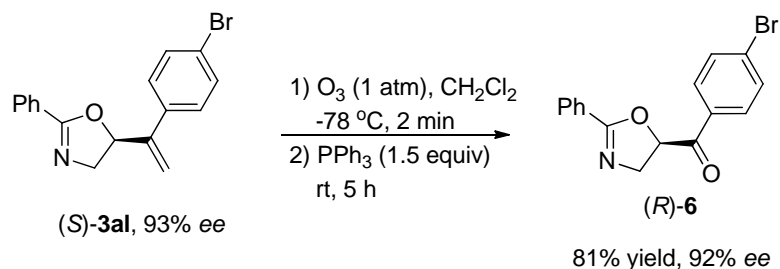

To a dried Schlenk tube were added (*S*)-**3al** (98.5 mg, 0.3 mmol) and  $\text{CH}_2\text{Cl}_2$  (6.0 mL). The resulting solution was cooled with a dry ice/acetone bath (-78 °C). A stream of ozone was passed through the solution until the resulting solution became blue (2 min). The resulting mixture was quenched with the addition of  $\text{PPh}_3$  (118.1 mg, 0.45 mmol). After warming to room temperature with stirring for 5 h, the resulting mixture was transferred to a round bottom flask with  $\text{CH}_2\text{Cl}_2$  (10 mL) and evaporated. The residue was purified by flash chromatography on silica gel to afford (*R*)-**6** (80.0 mg, 81%) (eluent: petroleum ether (b.p. 60-90 °C)/ethyl acetate = 10/1) as a solid: M.P. 125-127 °C (ethyl acetate); 92% *ee* (HPLC conditions: OJ column, hexane/*i*-PrOH = 70/30, 1.0 mL/min,  $\lambda$  = 214 nm,  $t_R$  (minor) = 18.1 min,  $t_R$  (major) = 26.8 min);  $[\alpha]_D^{28} = +59.6$  ( $c = 1.05$ ,  $\text{CHCl}_3$ );  $^1\text{H}$  NMR (400 MHz,  $\text{CDCl}_3$ )  $\delta$  = 8.01-7.92 (m, 2 H, Ar-H), 7.88 (d,  $J = 8.4$  Hz, 2 H, Ar-H), 7.67 (d,  $J = 8.8$  Hz, 2 H, Ar-H), 7.50 (t,  $J = 7.4$  Hz, 1 H, Ar-H), 7.42 (d,  $J = 7.4$  Hz, 2 H, Ar-H), 5.77 (dd,  $J_1 = 11.2$  Hz,  $J_2 = 7.6$  Hz, 1 H, OCH), 4.43 (dd,  $J_1 = 15.0$  Hz,  $J_2 = 11.0$  Hz, 1 H, one proton in  $\text{NCH}_2$ ), 4.32 (dd,  $J_1 = 15.2$  Hz,  $J_2 = 7.6$  Hz, 1 H, one proton in  $\text{NCH}_2$ );  $^{13}\text{C}$  NMR (100 MHz,  $\text{CDCl}_3$ )  $\delta$  = 194.2, 163.8, 132.9, 132.2, 131.7, 130.3, 129.3, 128.4, 128.3, 126.9, 79.6, 58.2; IR (neat,  $\text{cm}^{-1}$ ): 2962, 2924, 1694, 1651, 1586, 1261, 1084, 1021; MS (70 eV, EI)  $m/z$  (%): 329 ( $M^+(^{81}\text{Br})-2$ , 40.23), 327 ( $M^+(^{79}\text{Br})-2$ , 40.03), 144 (100); Anal. Calcd for  $\text{C}_{16}\text{H}_{12}\text{BrNO}_2$ : C 58.20, H 3.66, N 4.24; Found: C 58.33, H 3.90, N 4.30.

## References:

- [1] Fox, M. E.; Gerlach, A.; Lennon, I. C.; Meek, G.; Praquin, C. *Synthesis* **2005**, 3196.
- [2] (a) Luo H.; Ma, S. *Eur. J. Org. Chem.* **2013**, 3041; (b) Chen, B.; Wang, N.; Fan, W.; Ma, S. *Org. Biomol. Chem.* **2012**, *10*, 8465.
- [3] Joo, J.-E.; Lee, K.-Y.; Pham, V.-T.; Tian, Y.-S.; Ham, W.-H. *Org. Lett.* **2007**, *9*, 3627.
- [4] Wang, N.; Chen, B., Ma, S. *Adv. Synth. Catal.* **2014**, *356*, 485.
- [5] Komanduri, V.; Krische, M. J. *J. Am. Chem. Soc.* **2006**, *128*, 16448.

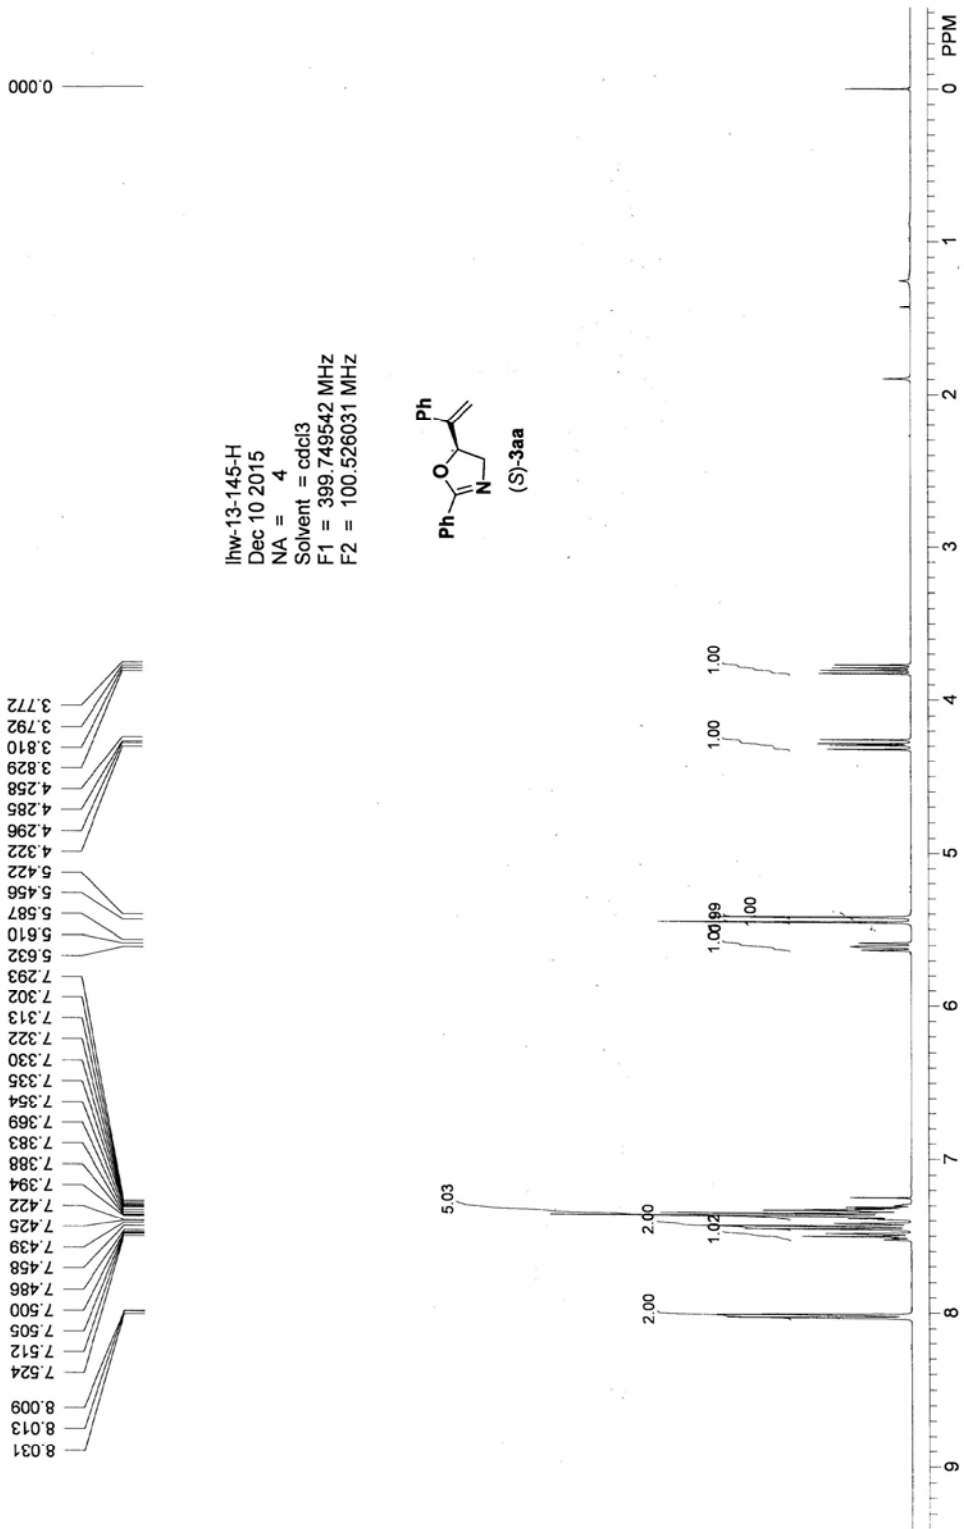

lhw-13-145-C  
Dec 10 2015  
NA = 512  
Solvent = cdcl3  
F1 = 100.527557 MHz  
F2 = 399.749146 MHz

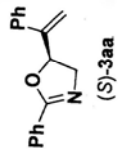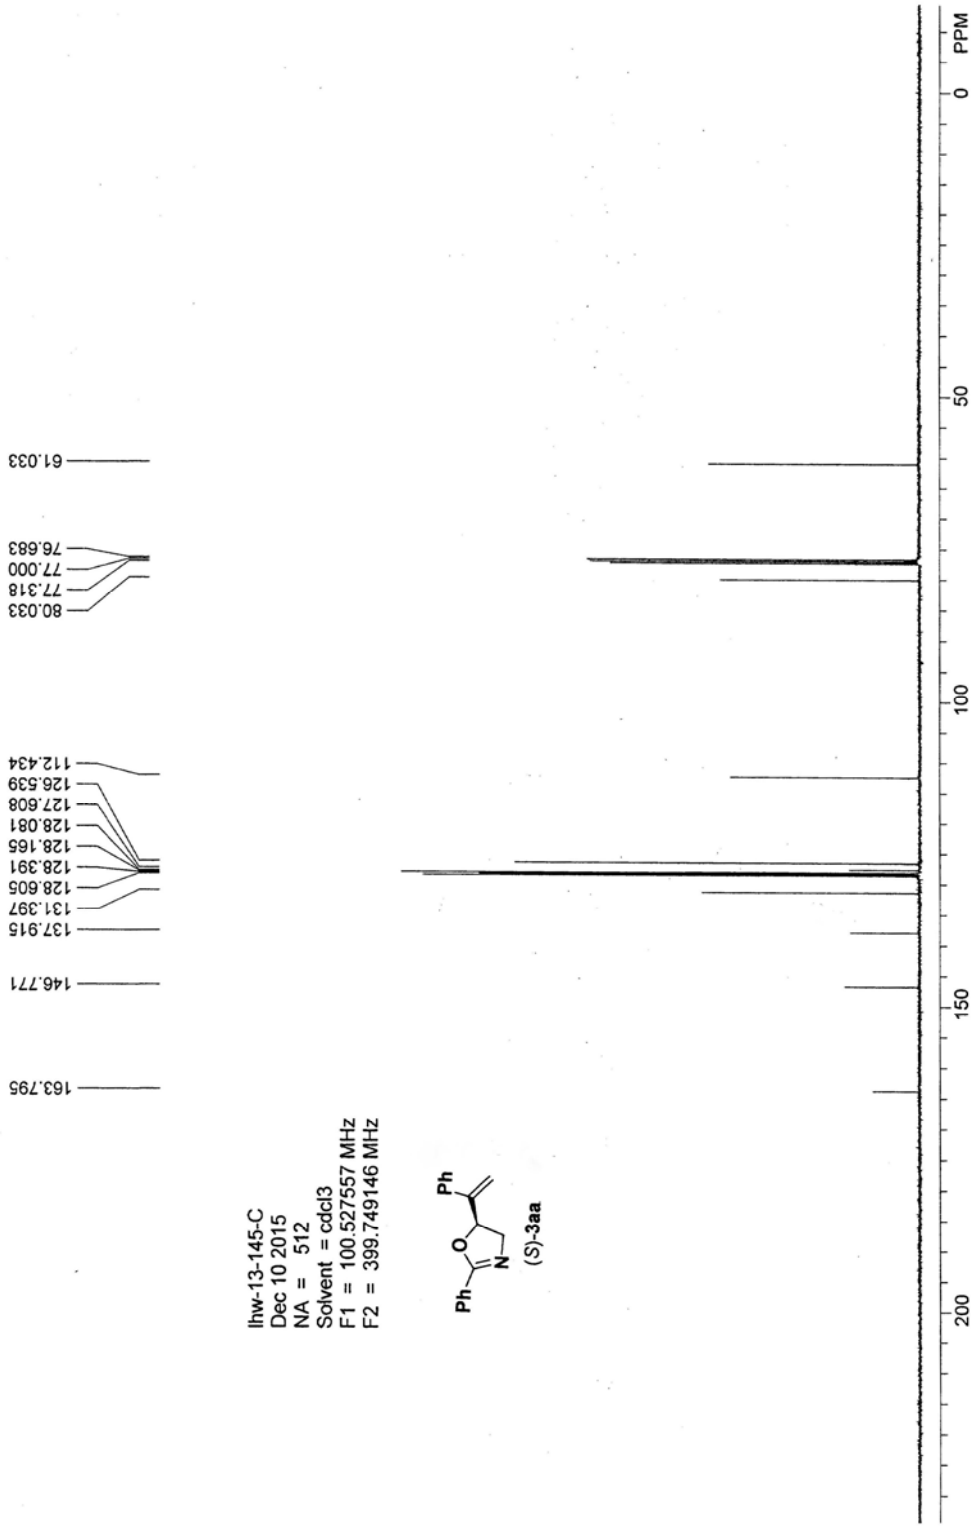



**SAMPLE INFORMATION**

|                   |                             |                  |                       |
|-------------------|-----------------------------|------------------|-----------------------|
| Sample Name:      | lhw-13-145-pc-2-90-10-1-214 | Acquired By:     | Breeze                |
| Sample Type:      | 未知                          | Date Acquired:   | 2016/1/6 17:24:18 CST |
| Vial:             | 1                           | Acq. Method:     | zjg90                 |
| Injection#:       | 38                          | Date Processed:  | 2016/1/6 17:43:33 CST |
| Injection Volume: | 25.00 $\mu$ l               | Channel Name:    | V0489 ChA             |
| Run Time:         | 20.00 Minutes               | Channel Desc.:   | V0489 ChA.214nm       |
| Column Type:      |                             | Sample Set Name: |                       |

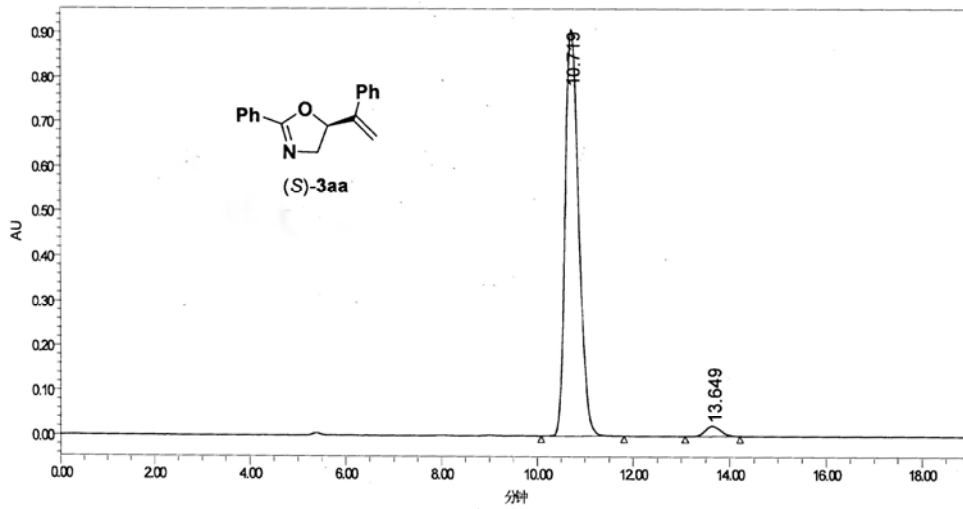

|   | RT<br>(min) | Area<br>(AUsec) | %Area | Height<br>(AU) | %<br>Height |
|---|-------------|-----------------|-------|----------------|-------------|
| 1 | 10.719      | 17756103        | 97.21 | 908604         | 97.58       |
| 2 | 13.649      | 509236          | 2.79  | 22534          | 2.42        |

**SAMPLE INFORMATION**

|                   |                         |                  |                       |
|-------------------|-------------------------|------------------|-----------------------|
| Sample Name:      | lnw5-22-pc-290-10-1-214 | Acquired By:     | Breeze                |
| Sample Type:      | 未知                      | Date Acquired:   | 2016/1/6 16:40:33 CST |
| Vial:             | 1                       | Acq. Method:     | zg90                  |
| Injection #:      | 36                      | Date Processed:  | 2016/1/6 17:26:59 CST |
| Injection Volume: | 25.00 $\mu$ l           | Channel Name:    | V02489 ChA            |
| Run Time:         | 40.00 Minutes           | Channel Desc.:   | V02489 ChA.214mm      |
| Column Type:      |                         | Sample Set Name: |                       |

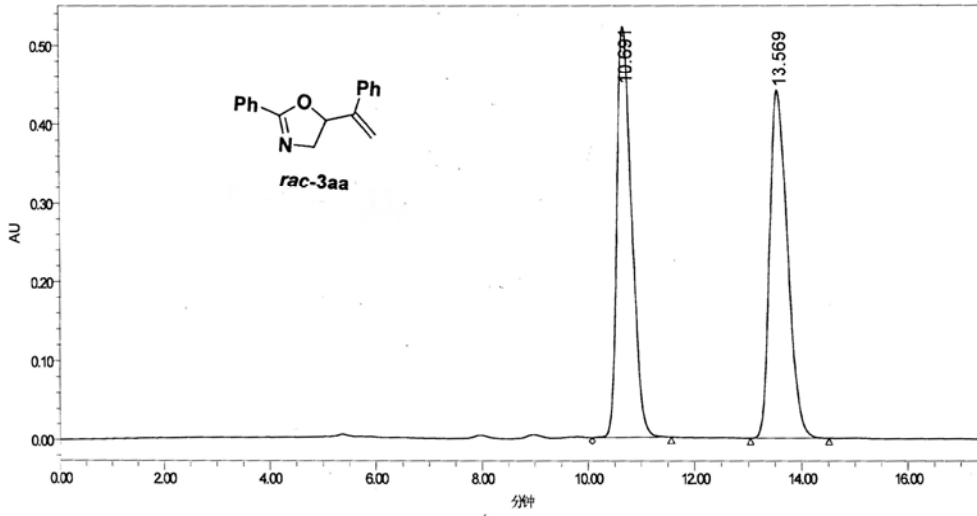

|   | RT (min) | Area (峰面积) | %Area | Height (峰高) | % Height |
|---|----------|------------|-------|-------------|----------|
| 1 | 10.691   | 10083045   | 49.56 | 521297      | 54.22    |
| 2 | 13.568   | 10261708   | 50.44 | 440237      | 45.78    |

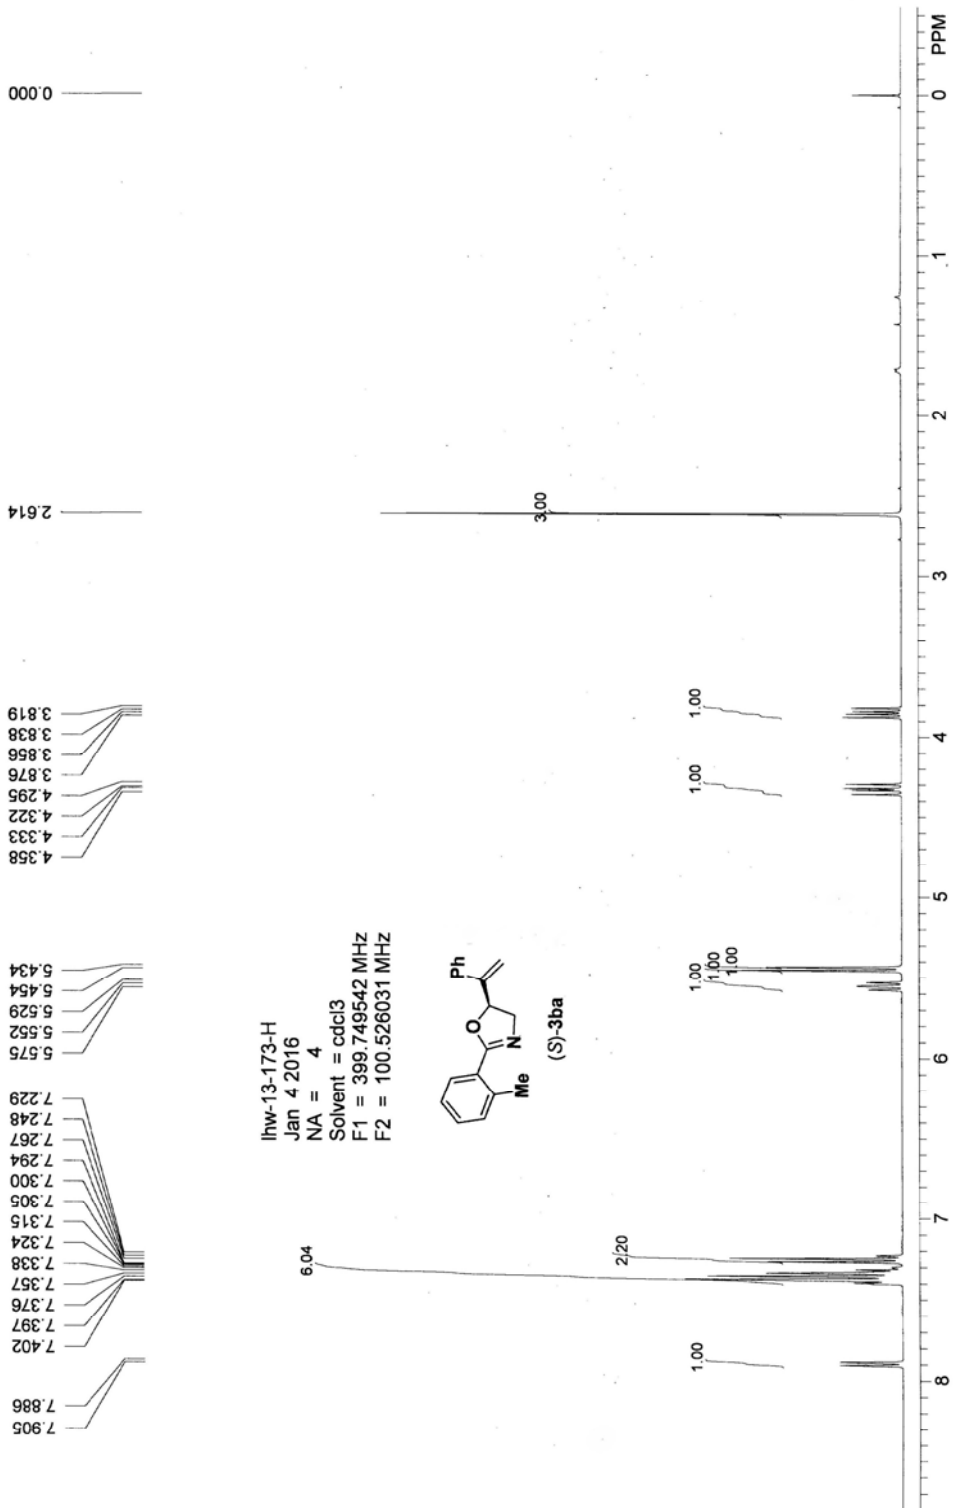

lhw-13-173-C  
Jan 4 2016  
NA = 1000  
Solvent = cdcl3  
F1 = 100.527557 MHz  
F2 = 399.749146 MHz

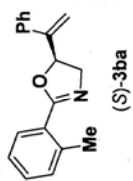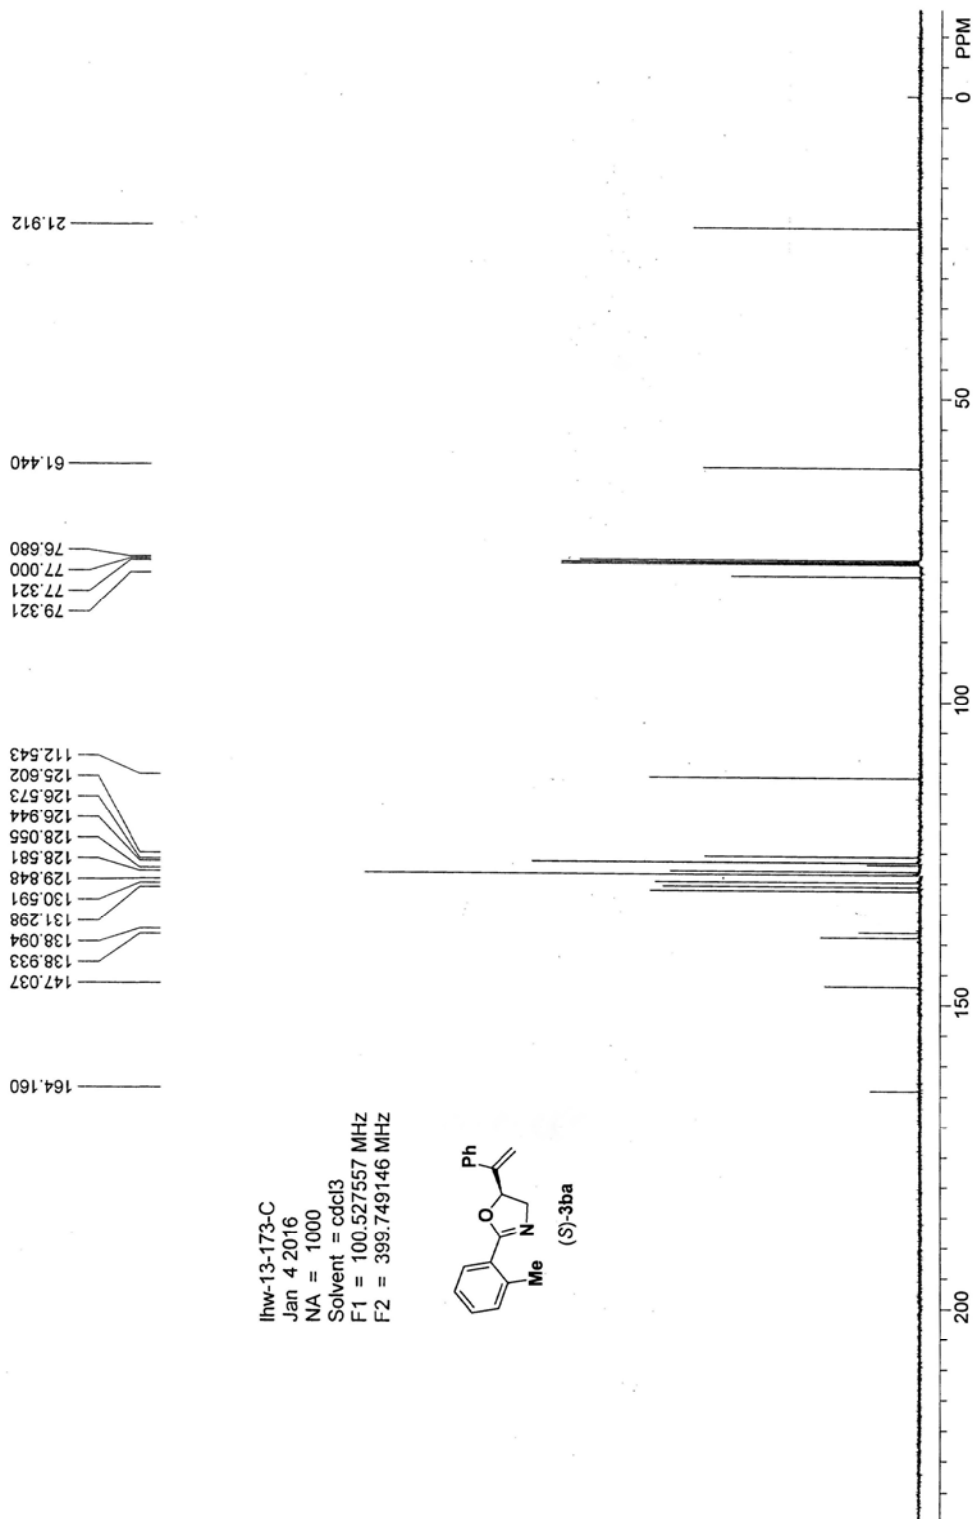

中国科学院上海有机化学研究所  
 Project Name: defaults for copy  
 Reported by User: Breeze user (Breeze)

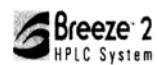

SAMPLE INFORMATION

|                   |                           |                  |                       |
|-------------------|---------------------------|------------------|-----------------------|
| Sample Name:      | lhw-13-173-q-h-95-5-1-214 | Acquired By:     | Breeze                |
| Sample Type:      | 未知                        | Date Acquired:   | 2016/1/5 16:20:55 CST |
| Vial:             | 1                         | Acq. Method:     | zgj1001               |
| Injection #:      | 19                        | Date Processed:  | 2016/1/5 16:48:49 CST |
| Injection Volume: | 25.00 $\mu$ l             | Channel Name:    | V2489 ChA             |
| Run Time:         | 60.00 Minutes             | Channel Desc.:   | V2489 ChA.230nm       |
| Column Type:      |                           | Sample Set Name: |                       |

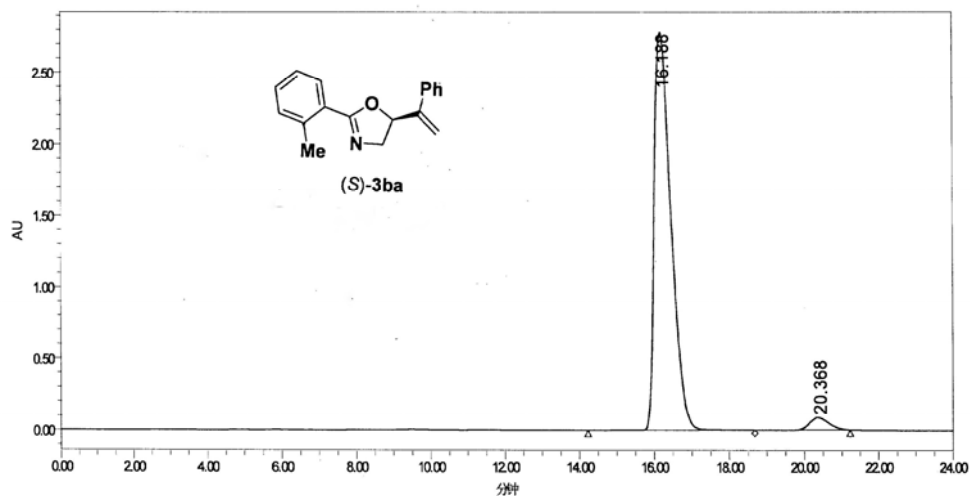

|   | RT (min) | Area (AU*sec) | %Area | Height (AU) | % Height |
|---|----------|---------------|-------|-------------|----------|
| 1 | 16.186   | 86035436      | 96.43 | 2783437     | 96.98    |
| 2 | 20.368   | 3187393       | 3.57  | 86292       | 3.01     |

**SAMPLE INFORMATION**

|                   |                         |                  |                       |
|-------------------|-------------------------|------------------|-----------------------|
| Sample Name:      | zy-1-104-q-h-95-5-1-214 | Acquired By:     | Breeze                |
| Sample Type:      | 未知                      | Date Acquired:   | 2016/1/5 15:30:27 CST |
| Val:              | 1                       | Acq. Method:     | zgj001                |
| Injection #:      | 17                      | Date Processed:  | 2016/1/5 16:48:26 CST |
| Injection Volume: | 25.00 $\mu$ l           | Channel Name:    | V02489 ChA            |
| Run Time:         | 60.00 Minutes           | Channel Desc.:   | V02489 ChA.230nm      |
| Column Type:      |                         | Sample Set Name: |                       |

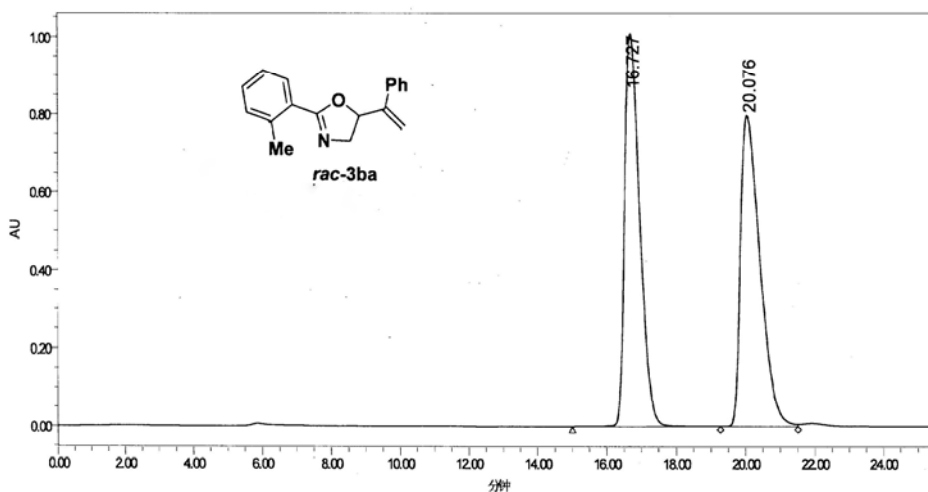

|   | RT (min) | Area (AU*sec) | %Area | Height (AU) | %Height |
|---|----------|---------------|-------|-------------|---------|
| 1 | 16.727   | 30609920      | 49.53 | 1009279     | 55.86   |
| 2 | 20.076   | 31186946      | 50.47 | 797440      | 44.14   |

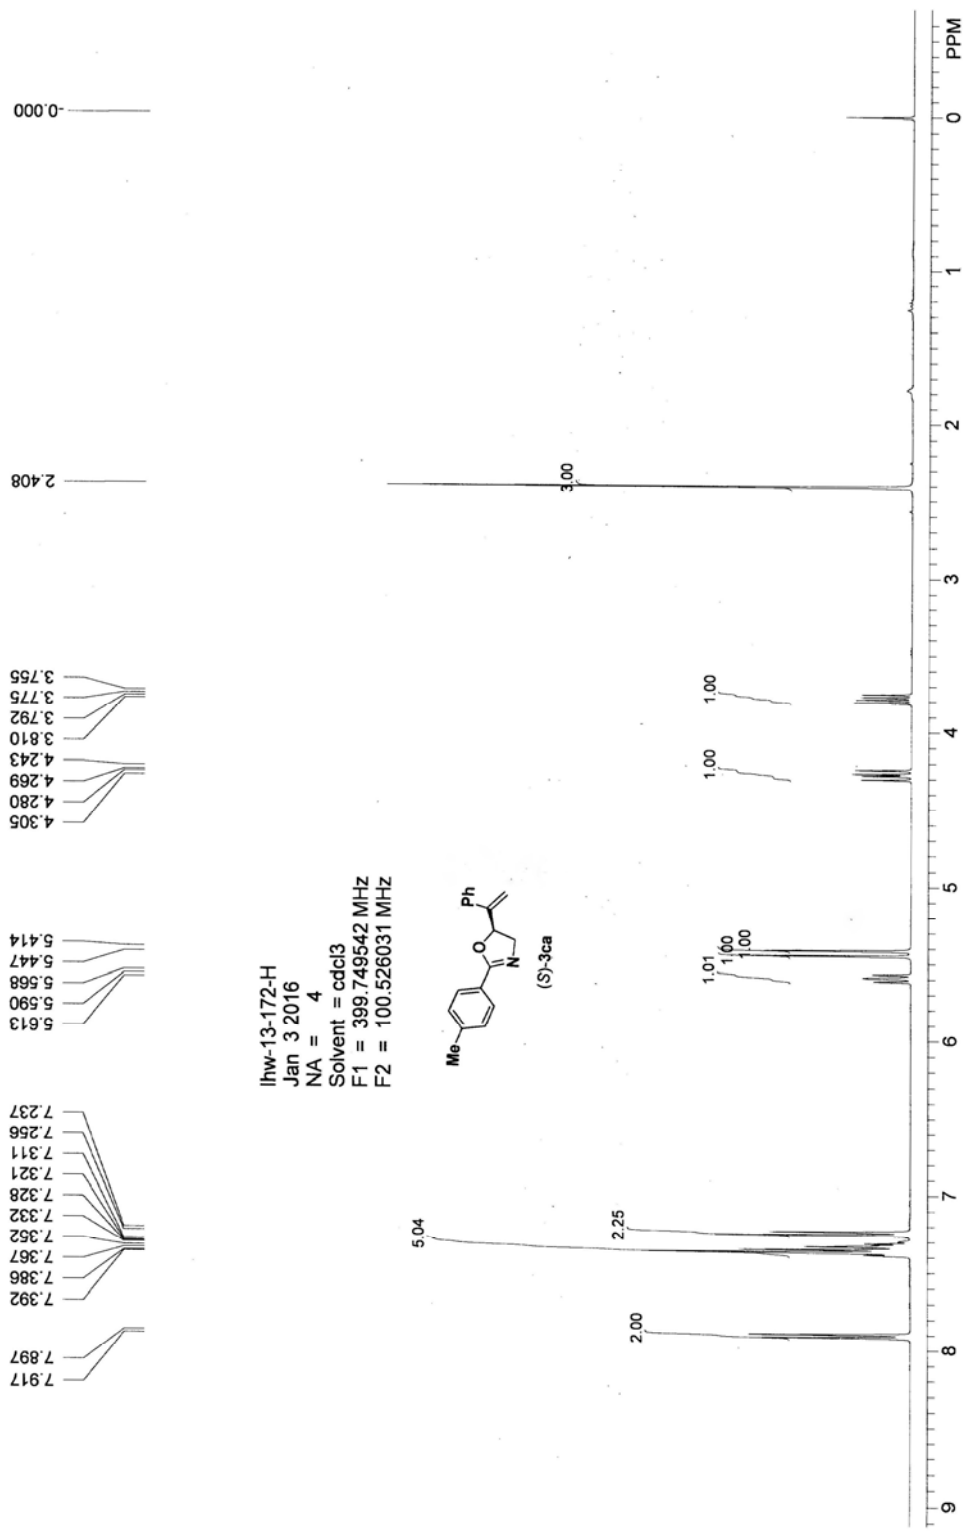

lhv-13-172-C  
Jan 3 2016  
NA = 1000  
Solvent = cdcl3  
F1 = 100.527557 MHz  
F2 = 399.749146 MHz

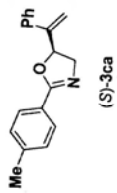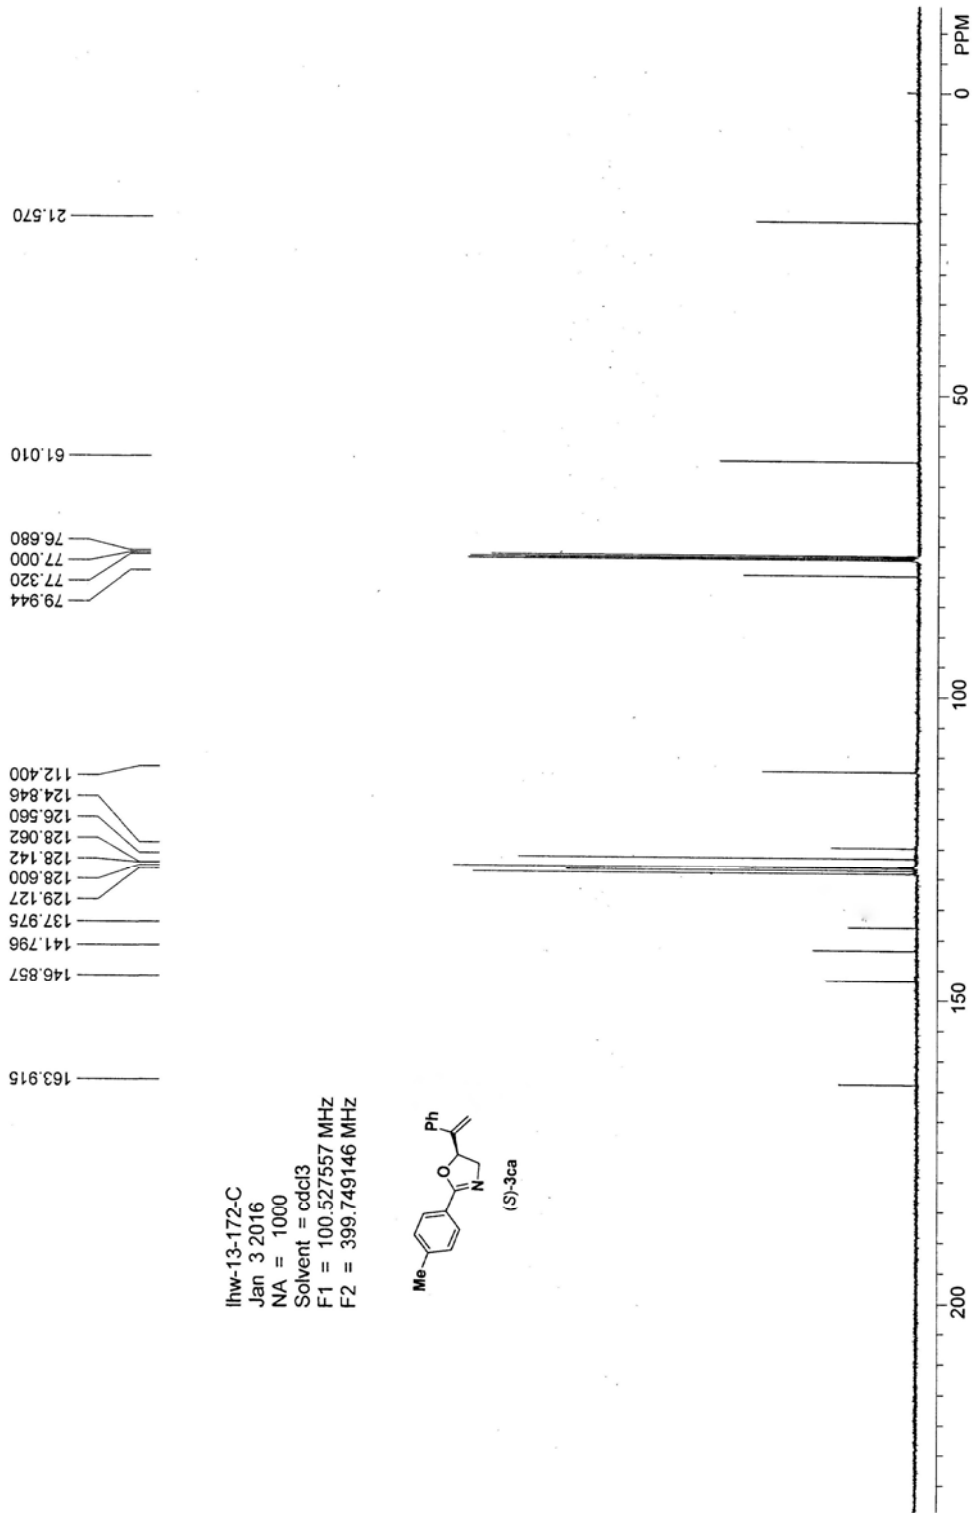



中国科学院上海有机化学研究所  
 Project Name: defaults for copy  
 Reported by User: Breeze user (Breeze)

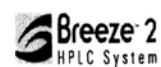

| SAMPLE INFORMATION |                           |                  |                       |
|--------------------|---------------------------|------------------|-----------------------|
| Sample Name:       | lhw-13-172-oz-h-955-1-214 | Acquired By:     | Breeze                |
| Sample Type:       | 未知                        | Date Acquired:   | 2016/1/6 11:20:52 CST |
| Val:               | 1                         | Acq. Method:     | zgj95                 |
| Injection #:       | 25                        | Date Processed:  | 2016/1/6 17:25:40 CST |
| Injection Volume:  | 25.00 $\mu$ l             | Channel Name:    | V02489 ChA            |
| Run Time:          | 50.00 Minutes             | Channel Desc.:   | V02489 ChA.230nm      |
| Column Type:       |                           | Sample Set Name: |                       |

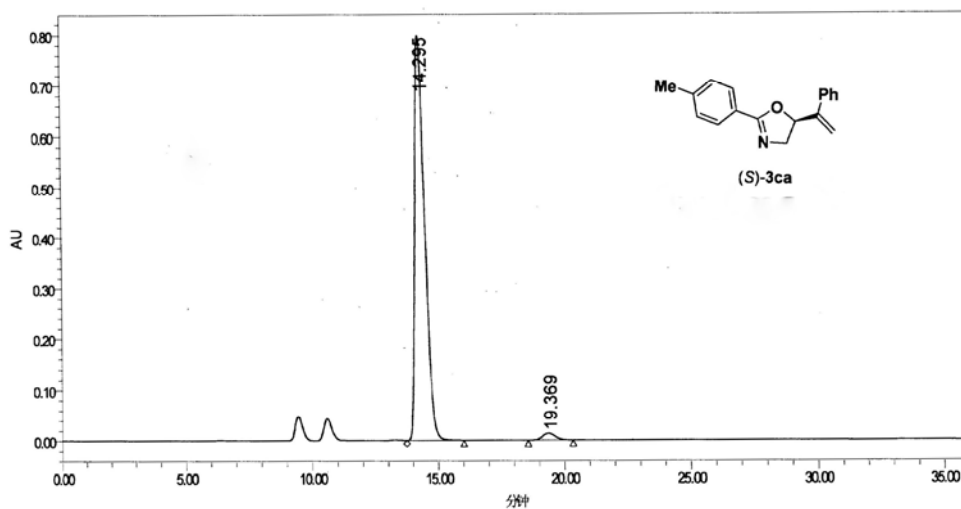

|   | RT<br>(min) | Area<br>(峰sec) | %Area | Height<br>(峰) | %<br>Height |
|---|-------------|----------------|-------|---------------|-------------|
| 1 | 14.236      | 21577312       | 97.81 | 798153        | 98.30       |
| 2 | 19.369      | 483841         | 2.19  | 13822         | 1.70        |

**SAMPLE INFORMATION**

|                   |                         |                  |                       |
|-------------------|-------------------------|------------------|-----------------------|
| Sample Name:      | zy-1-66-az-h-95-5-1-214 | Acquired By:     | Breeze                |
| Sample Type:      | 未知                      | Date Acquired:   | 2016/1/6 12:21:24 CST |
| Vial:             | 1                       | Acq. Method:     | zgj95                 |
| Injection #:      | 27                      | Date Processed:  | 2016/1/6 17:25:52 CST |
| Injection Volume: | 25.00 uL                | Channel Name:    | V2489 ChA             |
| Run Time:         | 25.00 Minutes           | Channel Desc.:   | V2489 ChA.230mm       |
| Column Type:      |                         | Sample Set Name: |                       |

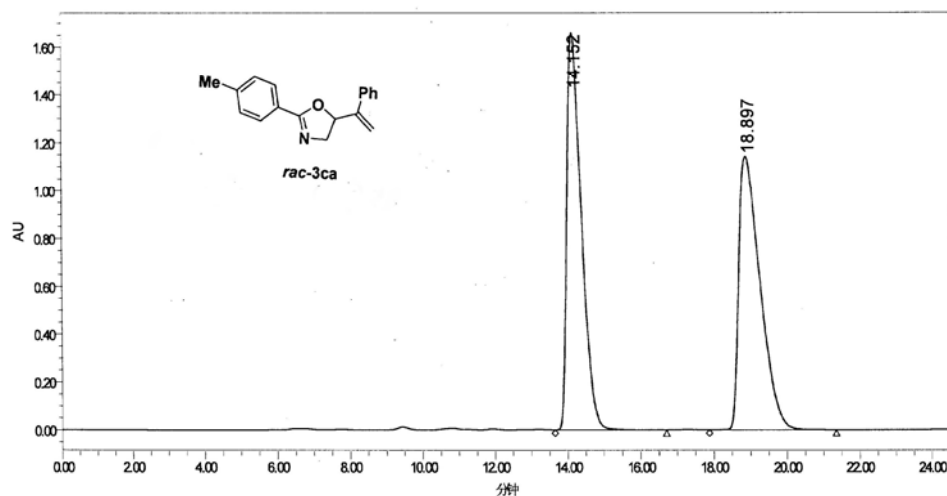

|   | RT (min) | Area (峰面积) | %Area | Hight (峰高) | % Hight |
|---|----------|------------|-------|------------|---------|
| 1 | 14.152   | 46434299   | 50.24 | 1658968    | 59.25   |
| 2 | 18.897   | 45996140   | 49.76 | 1141151    | 40.75   |

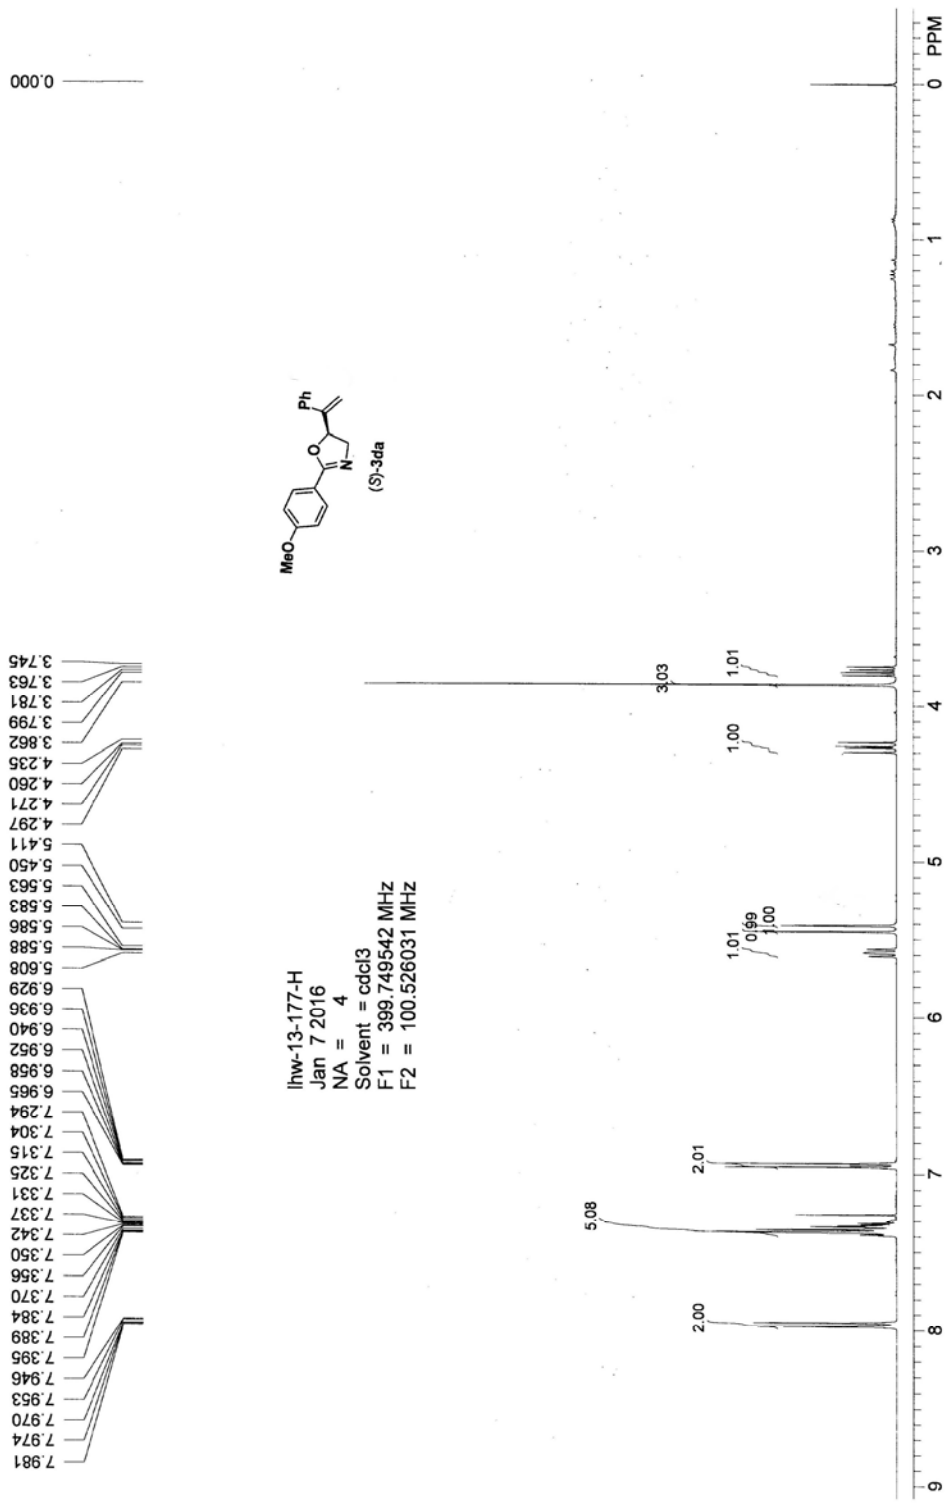

lhw-13-177-C  
Jan 7 2016  
NA = 1000  
Solvent = cdcl3  
F1 = 100.527557 MHz  
F2 = 399.749146 MHz

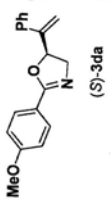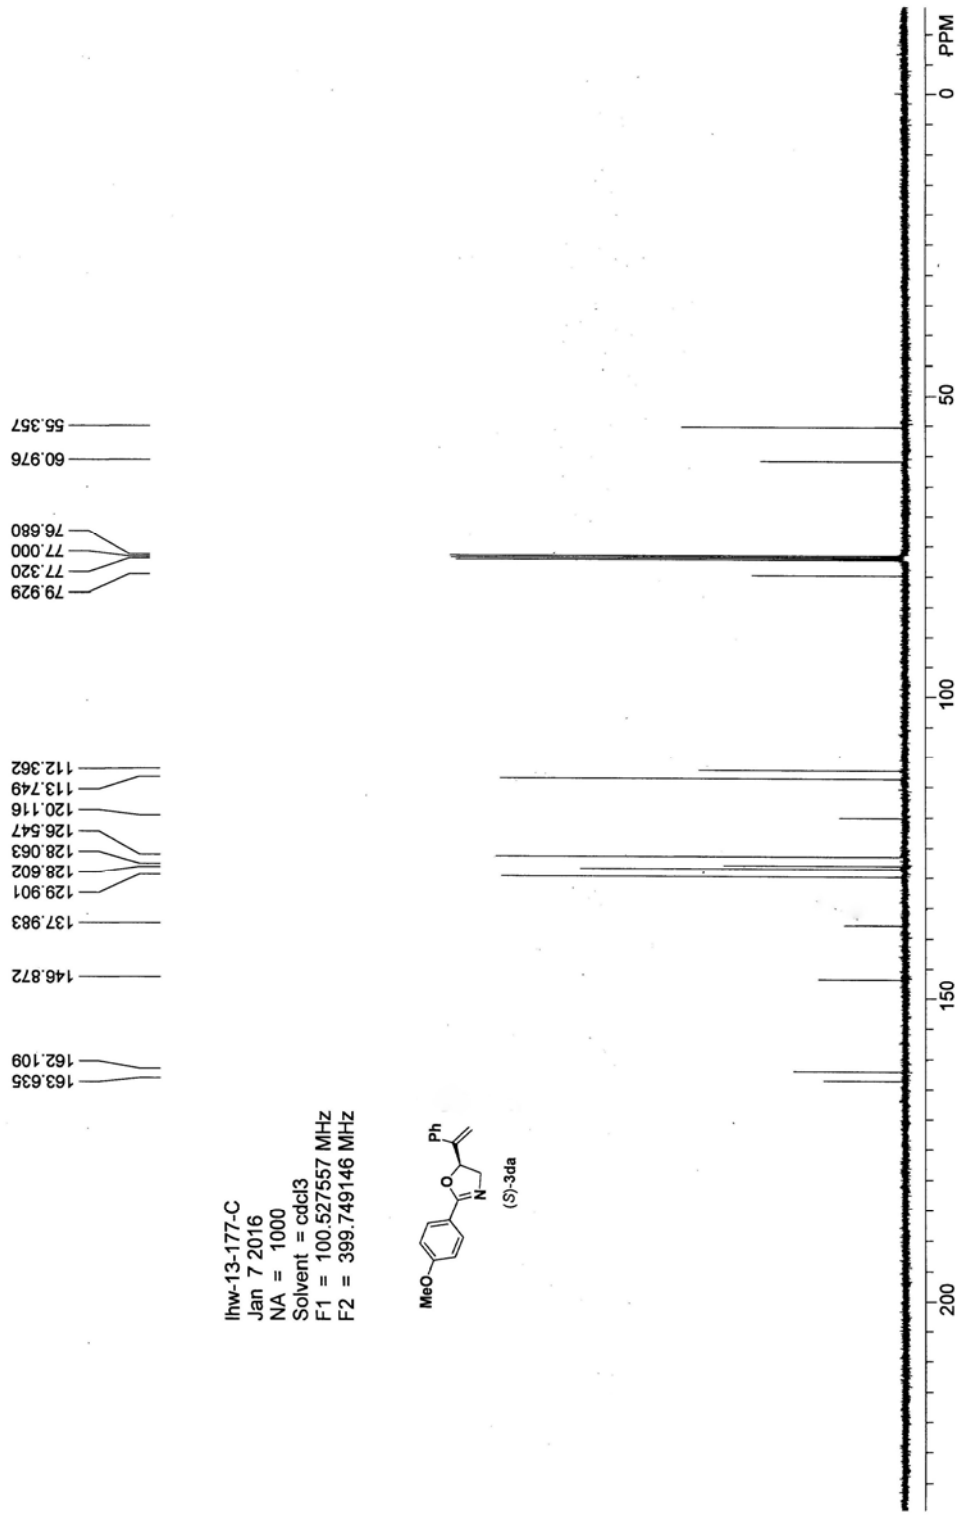

# lhw-13-177-pc-2-80-20-1-214

实验时间: 2016-01-15, 15:24:28

报告时间: 2016-01-15, 17:19:40

谱图文件: d:\zhuguangji\lh\20160115\lh-13-177-pc-2-80-20-1-214..org

实验内容简介:

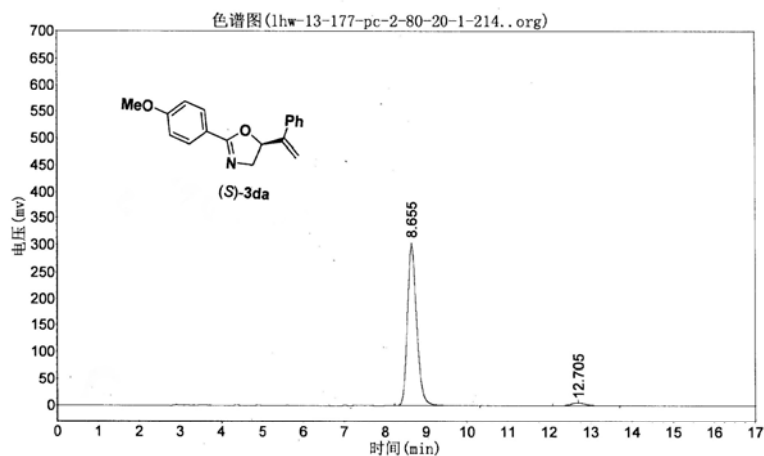

分析结果表

| 峰号 | 峰名 | 保留时间   | 峰高         | 峰面积         | 含量       |
|----|----|--------|------------|-------------|----------|
| 1  |    | 8.655  | 297314.844 | 4836326.000 | 96.9540  |
| 2  |    | 12.705 | 5774.260   | 151940.859  | 3.0460   |
| 总计 |    |        | 303089.104 | 4988266.859 | 100.0000 |

# zy-1-71-pc-2-80-20-1-214

实验时间: 2016-01-15, 14:22:16

报告时间: 2016-01-15, 17:18:42

谱图文件: d:\zhuguangjiong\lhw\20160115\zy-1-71-pc-2-80-20-1-214.org

实验内容简介:

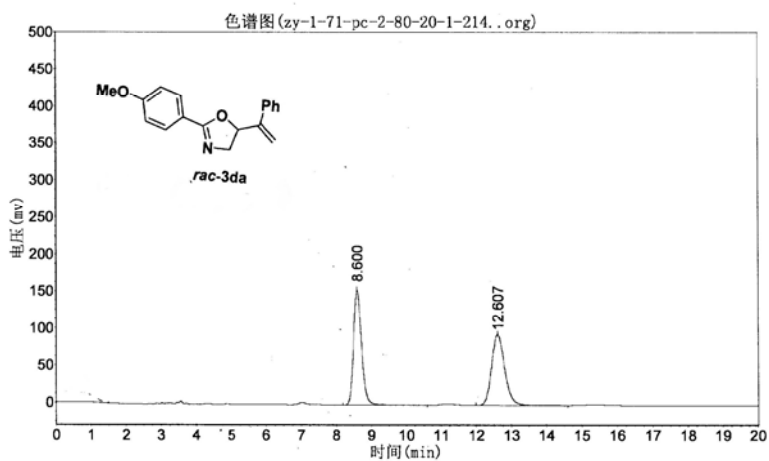

分析结果表

| 峰号 | 峰名 | 保留时间   | 峰高         | 峰面积         | 含量       |
|----|----|--------|------------|-------------|----------|
| 1  |    | 8.600  | 154558.594 | 2484280.250 | 50.1006  |
| 2  |    | 12.607 | 94957.328  | 2474304.750 | 49.8994  |
| 总计 |    |        | 249515.922 | 4958585.000 | 100.0000 |

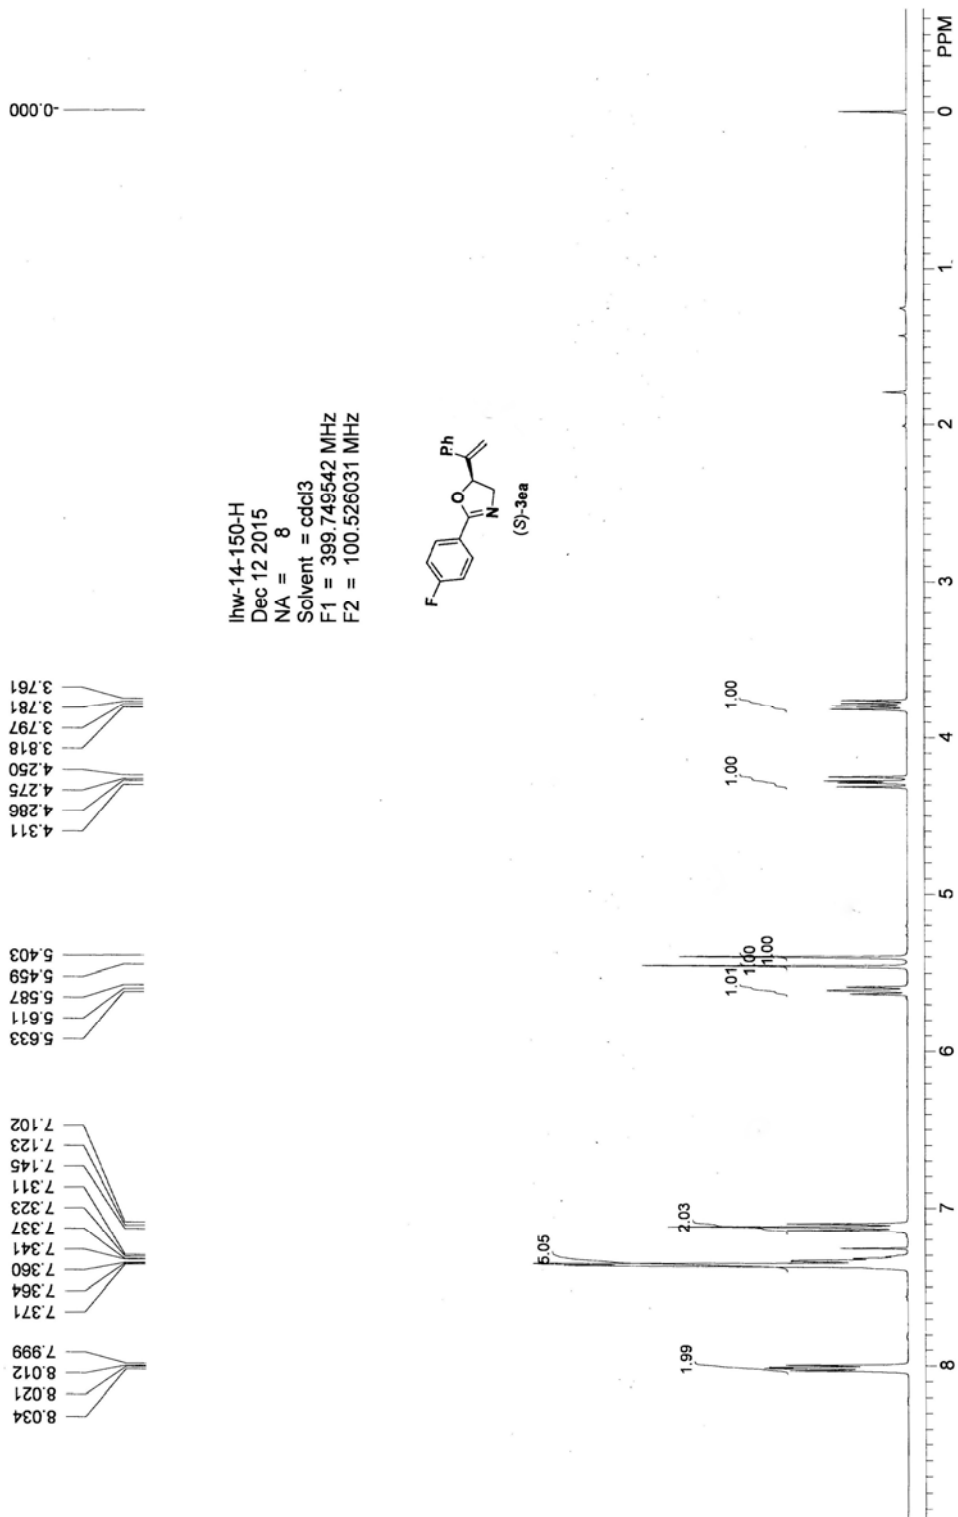

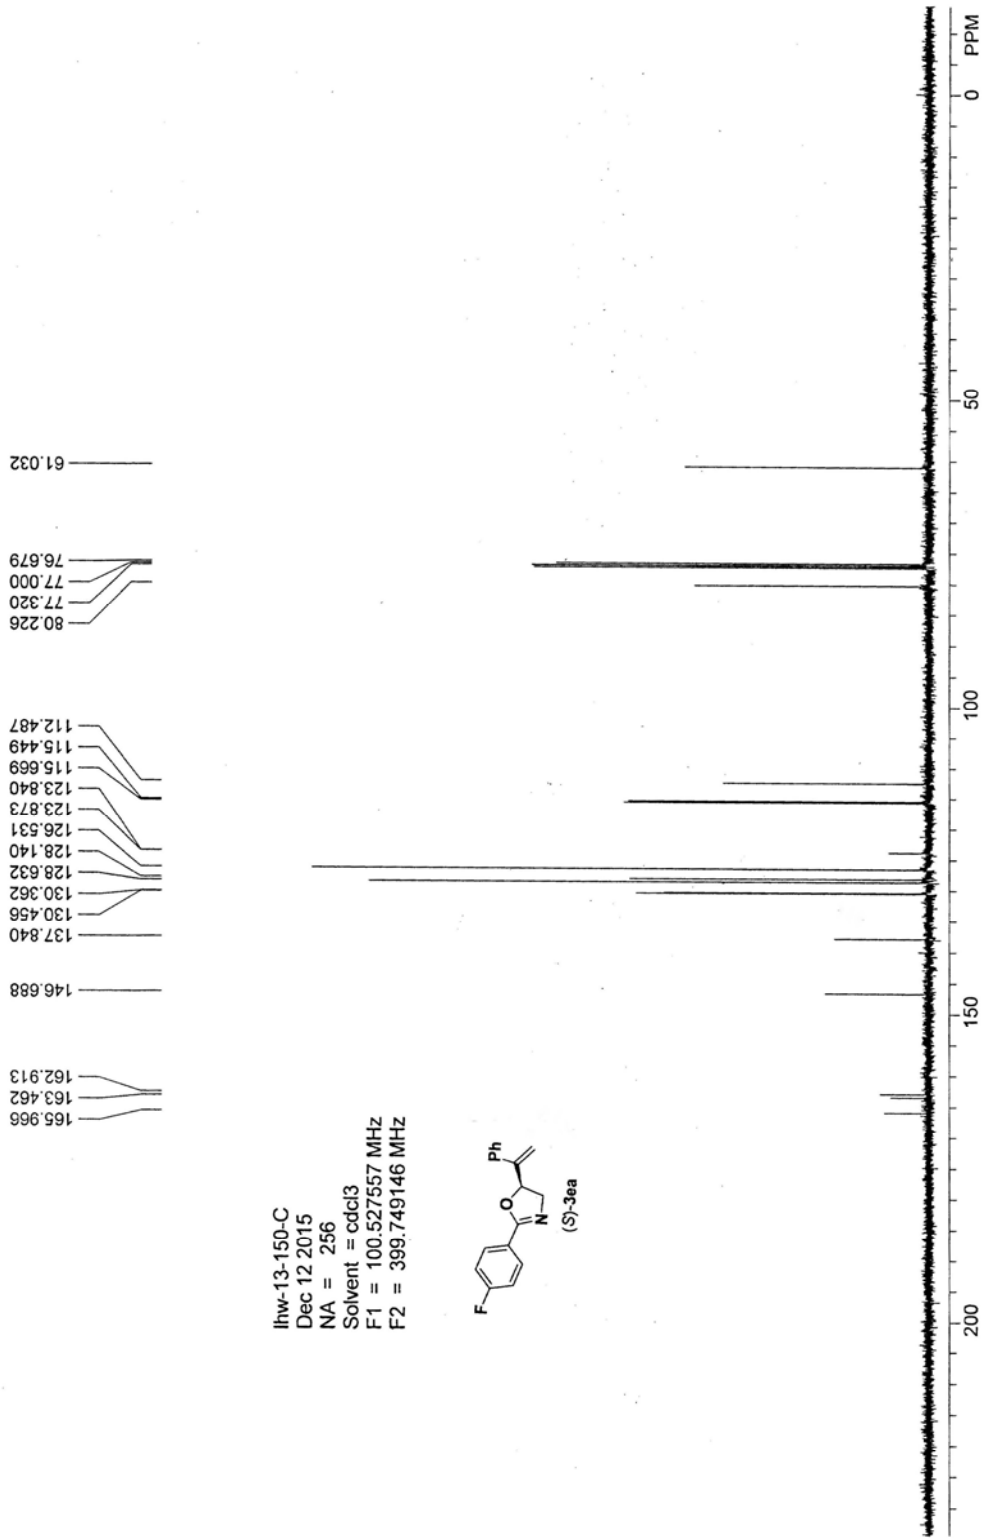



108.526

0.000

lhw-13-150-F  
Jul 22 2016  
NA = 64  
Solvent = cdcl3  
F1 = 376.118622 MHz  
F2 = 100.526031 MHz

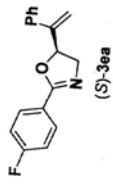

PPM

-150

-100

-50

0

50

中国科学院上海有机化学研究所

Project Name: defaults for copy

Reported by User: Breeze user (Breeze)

Breeze 2  
HPLC System

### SAMPLE INFORMATION

|                   |                            |                  |                         |
|-------------------|----------------------------|------------------|-------------------------|
| Sample Name:      | lhw-13-150-oz-h-95-5-1-214 | Acquired By:     | Breeze                  |
| Sample Type:      | 未知                         | Date Acquired:   | 2015/12/24 15:39:21 CST |
| Vial:             | 1                          | Acq. Method:     | zg95                    |
| Injection #:      | 50                         | Date Processed:  | 2015/12/24 17:08:20 CST |
| Injection Volume: | 25.00 $\mu$ l              | Channel Name:    | V2489 ChA               |
| Run Time:         | 20.00 Minutes              | Channel Desc.:   | V2489 ChA.230mm         |
| Column Type:      |                            | Sample Set Name: |                         |

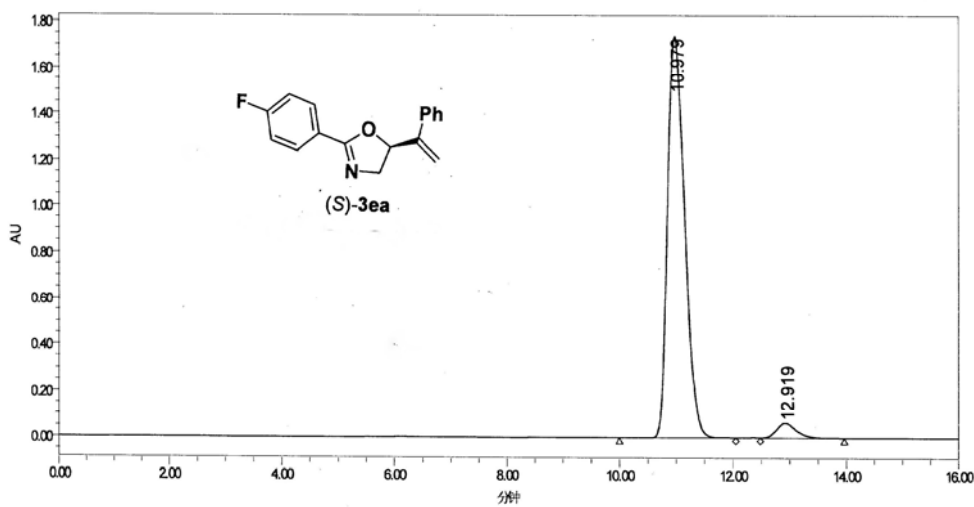

| RT (min) | Area (AU*sec) | %Area | Hight (AU) | % Hight |
|----------|---------------|-------|------------|---------|
| 1 10.979 | 35400532      | 95.80 | 1738964    | 95.42   |
| 2 12.919 | 1594668       | 4.20  | 64625      | 3.58    |

Report Method: Individual Report ASC

Page: 1 (共计 1)

Printed 2015/12/24

17:23:17 PRC

中国科学院上海有机化学研究所  
 Project Name: defaults for copy  
 Reported by User: Breeze User (Breeze)

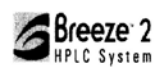

SAMPLE INFORMATION

|                  |                        |                 |                         |
|------------------|------------------------|-----------------|-------------------------|
| Sample Name      | zy-193-oz-h-95-5-1-214 | Acquired By:    | Breeze                  |
| Sample Type      | 未知                     | Date Acquired   | 2015/12/24 14:49:08 CST |
| Val:             | 1                      | Acq. Method     | zg95                    |
| Injection #      | 48                     | Date Processed  | 2015/12/24 17:07:59 CST |
| Injection Volume | 25.00 $\mu$ l          | Channel Name    | V2489 ChA               |
| Run Time         | 60.00 Minutes          | Channel Desc.:  | V2489 ChA.230mm         |
| Column Type      |                        | Sample Set Name |                         |

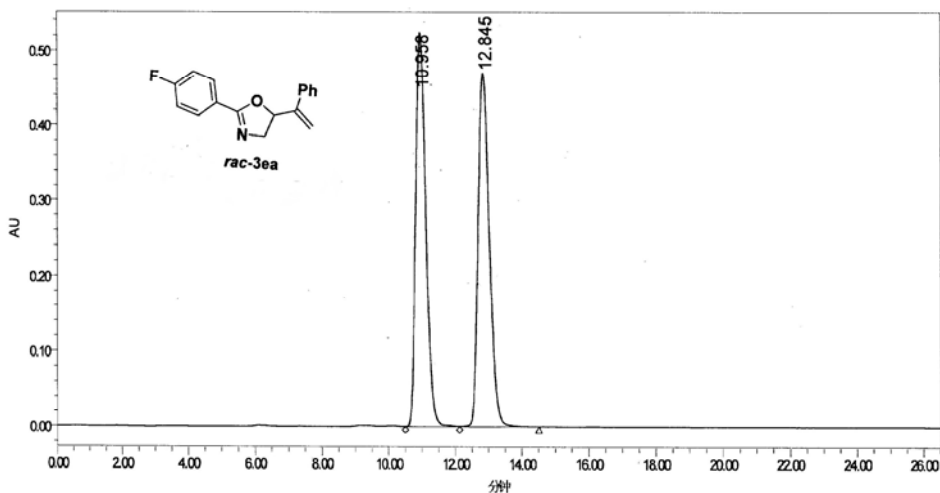

| RT (min) | Area (AU*sec) | %Area | Height (AU) | % Height |
|----------|---------------|-------|-------------|----------|
| 10.958   | 10997170      | 50.01 | 525027      | 52.75    |
| 12.845   | 10993716      | 49.99 | 470226      | 47.25    |

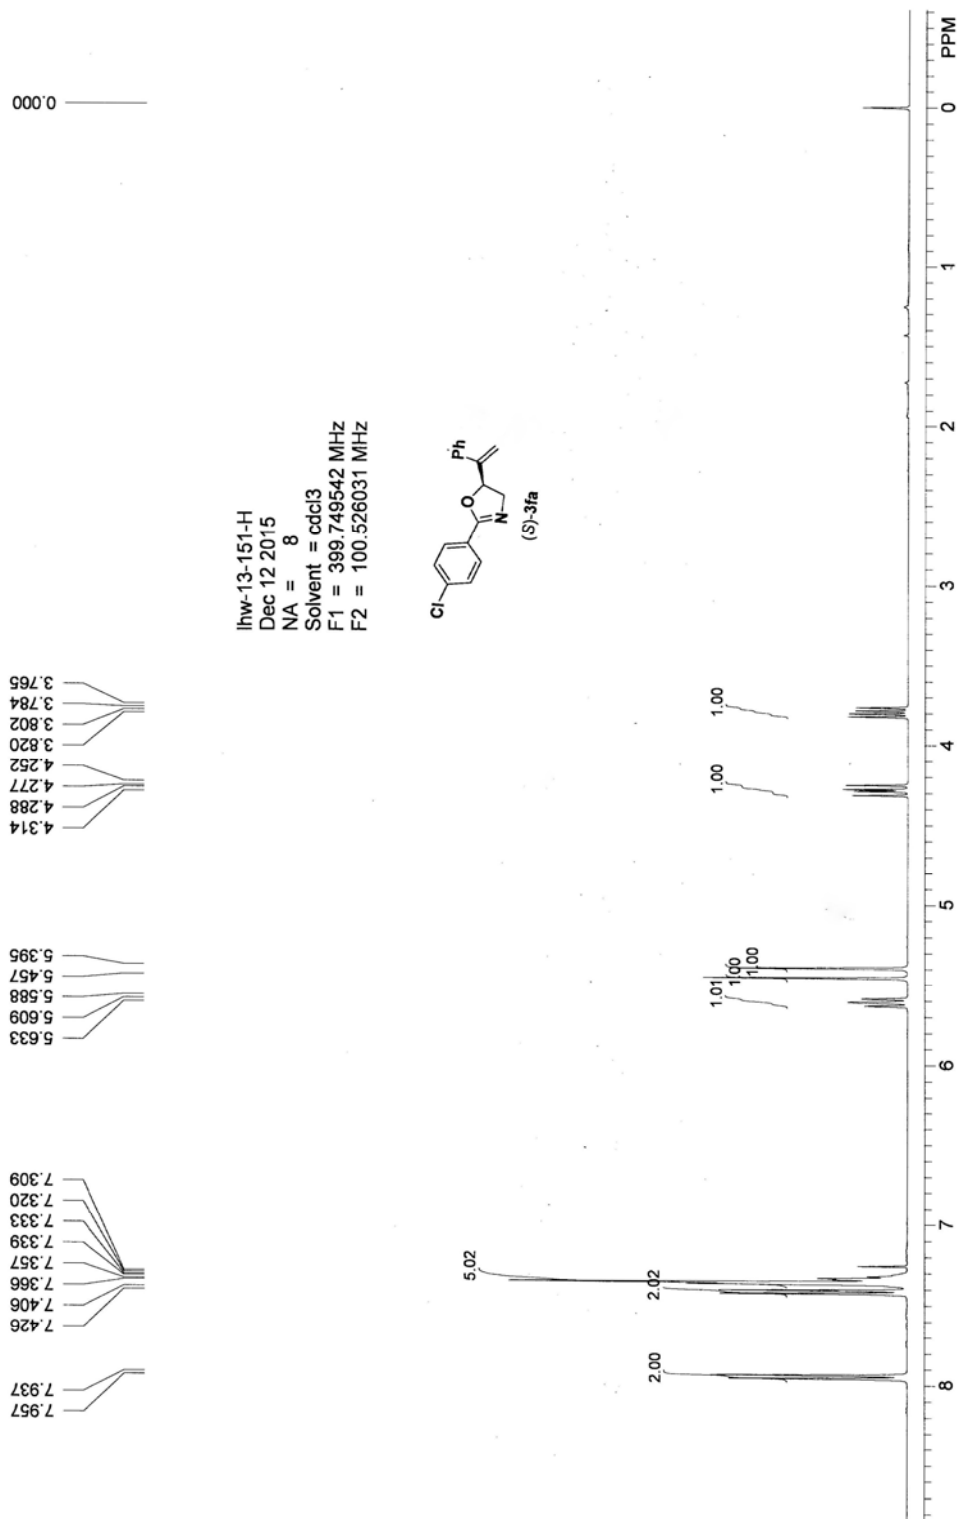

lhv-13-151-C  
Dec 12 2015  
NA = 256  
Solvent = cdcl3  
F1 = 100.527557 MHz  
F2 = 399.749146 MHz

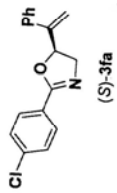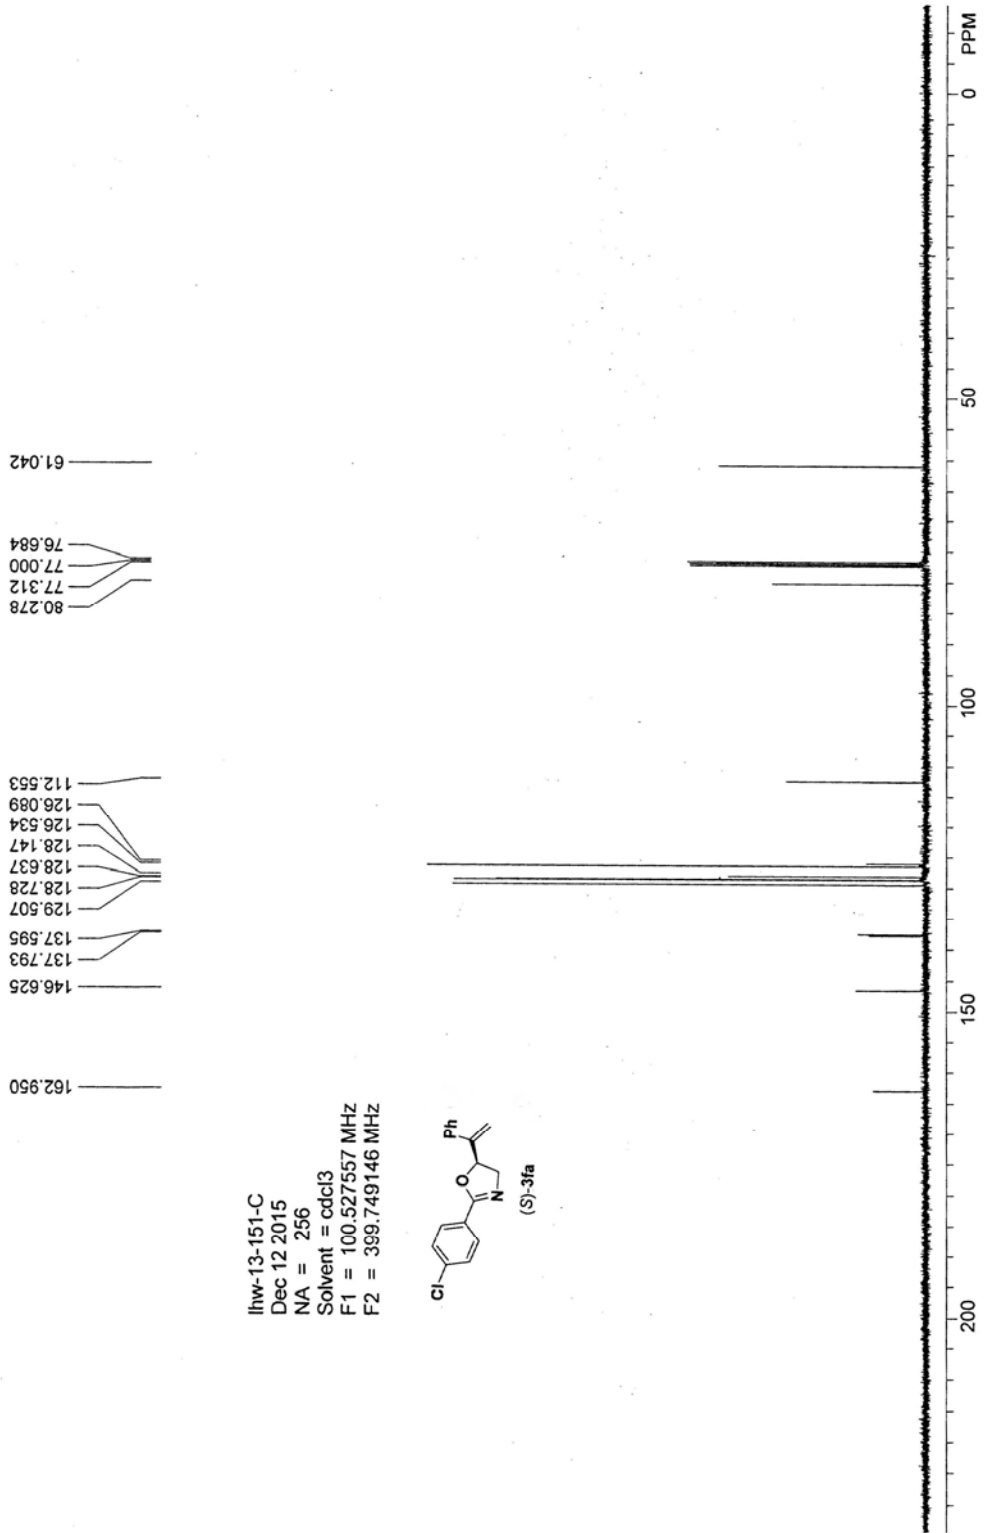

**SAMPLE INFORMATION**

|                   |                            |                  |                         |
|-------------------|----------------------------|------------------|-------------------------|
| Sample Name:      | lhw-13-151-g-h-100-1-1-214 | Acquired By:     | Breeze                  |
| Sample Type:      | 未知                         | Date Acquired:   | 2015/12/22 18:54:08 CST |
| Vial:             | 1                          | Acq. Method:     | zg1001                  |
| Injection #:      | 24                         | Date Processed:  | 2015/12/23 16:46:01 CST |
| Injection Volume: | 25.00 ul                   | Channel Name:    | V2489 ChA               |
| Run Time:         | 60.00 Minutes              | Channel Desc.:   | V2489 ChA 230nm         |
| Column Type:      |                            | Sample Set Name: |                         |

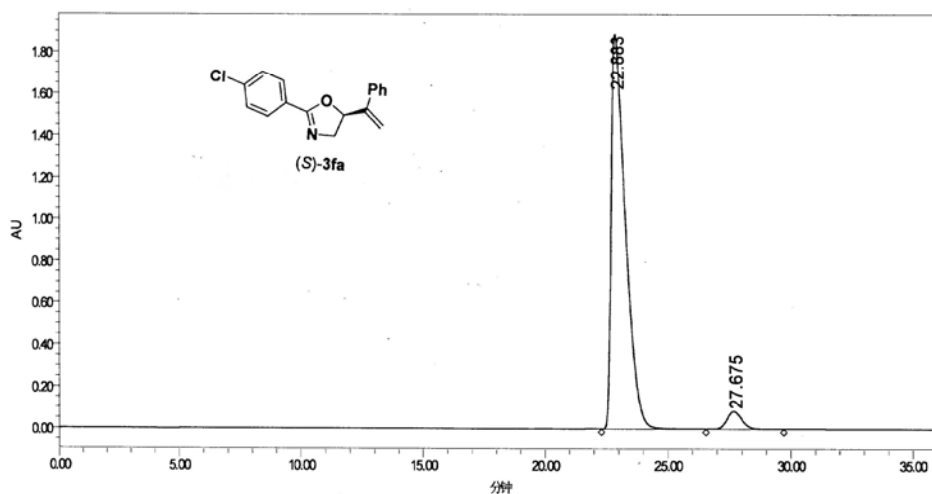

|   | RT (min) | Area (峰面积) | %Area | Height (峰高) | % Height |
|---|----------|------------|-------|-------------|----------|
| 1 | 22.883   | 75591829   | 95.50 | 1885580     | 95.73    |
| 2 | 27.675   | 3665416    | 4.50  | 84090       | 4.27     |

中国科学院上海有机化学研究所

Project Name: defaults for copy  
Reported by User: Breeze user (Breeze)

**Breeze 2**  
HPLC System

### SAMPLE INFORMATION

|                   |                        |                  |                         |
|-------------------|------------------------|------------------|-------------------------|
| Sample Name:      | zy-168-q-h-100-1-1-214 | Acquired By:     | Breeze                  |
| Sample Type:      | 未知                     | Date Acquired:   | 2015/12/22 17:46:54 CST |
| Vial:             | 1                      | Acq. Method:     | zg1001                  |
| Injection#:       | 22                     | Date Processed:  | 2015/12/23 16:45:45 CST |
| Injection Volume: | 25.00 $\mu$ l          | Channel Name:    | V02489 ChA              |
| Run Time:         | 60.00 Minutes          | Channel Desc.:   | V02489 ChA.230mm        |
| Column Type:      |                        | Sample Set Name: |                         |

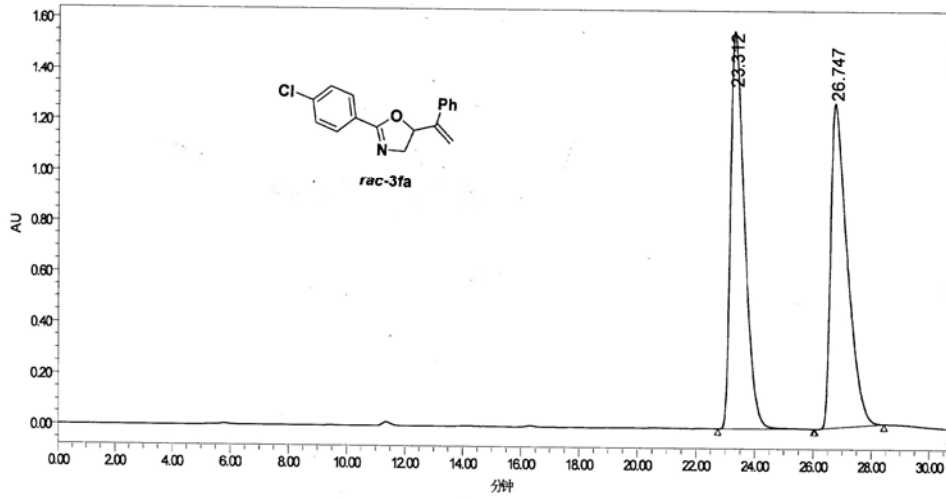

|   | RT<br>(min) | Area<br>(峰面积) | %Area | Height<br>(峰高) | %<br>Height |
|---|-------------|---------------|-------|----------------|-------------|
| 1 | 23.312      | 51322481      | 50.37 | 1559657        | 55.12       |
| 2 | 26.747      | 50558400      | 49.63 | 1270084        | 44.88       |

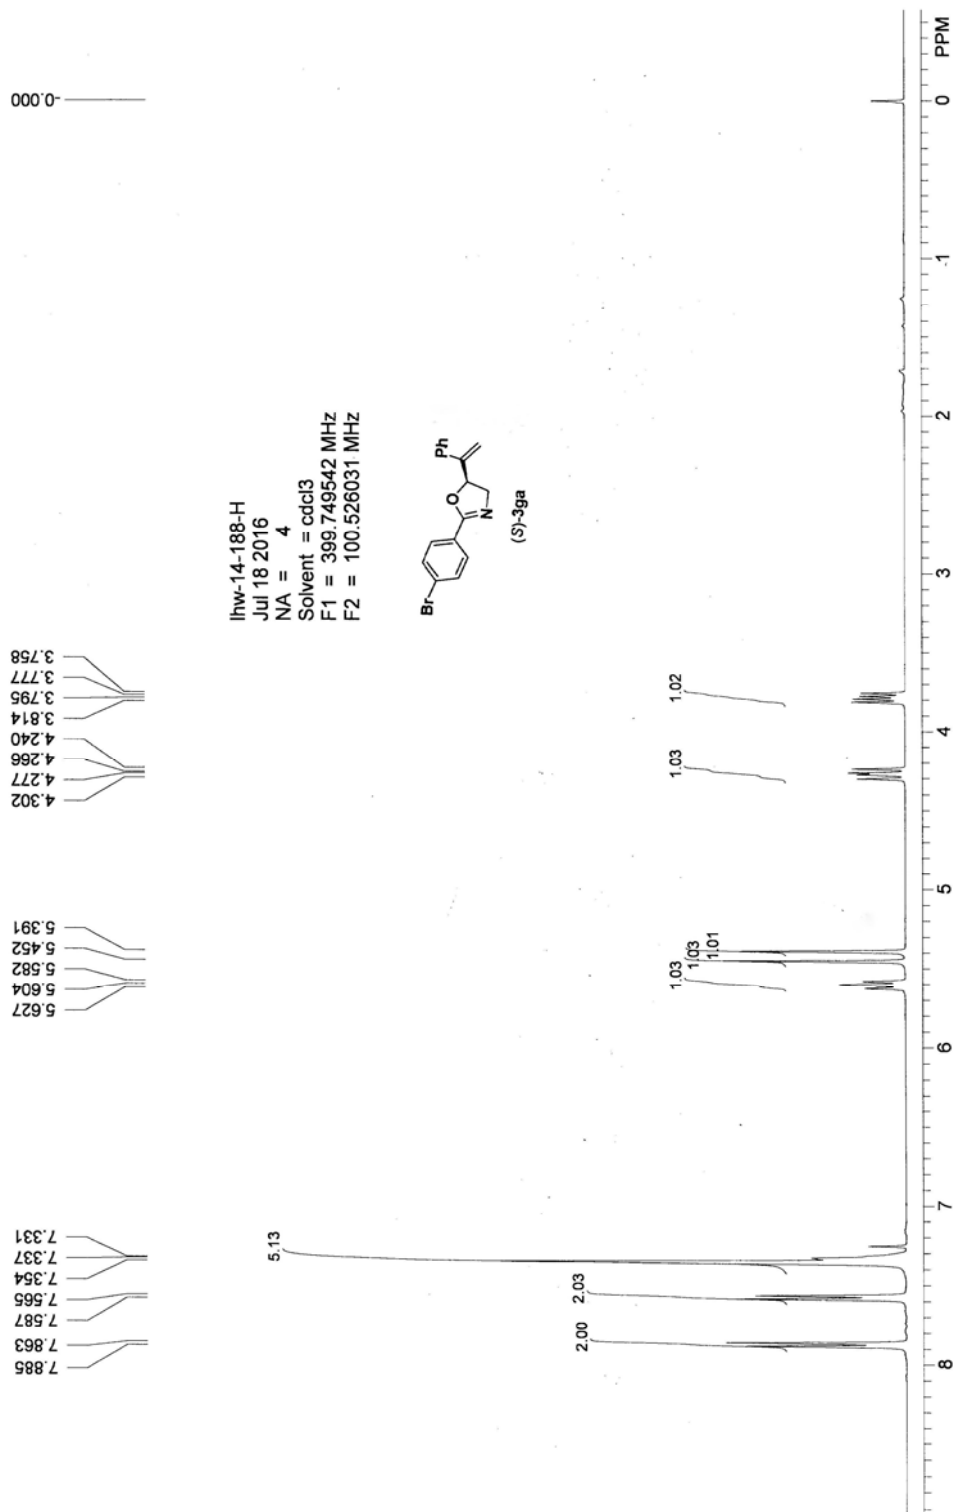



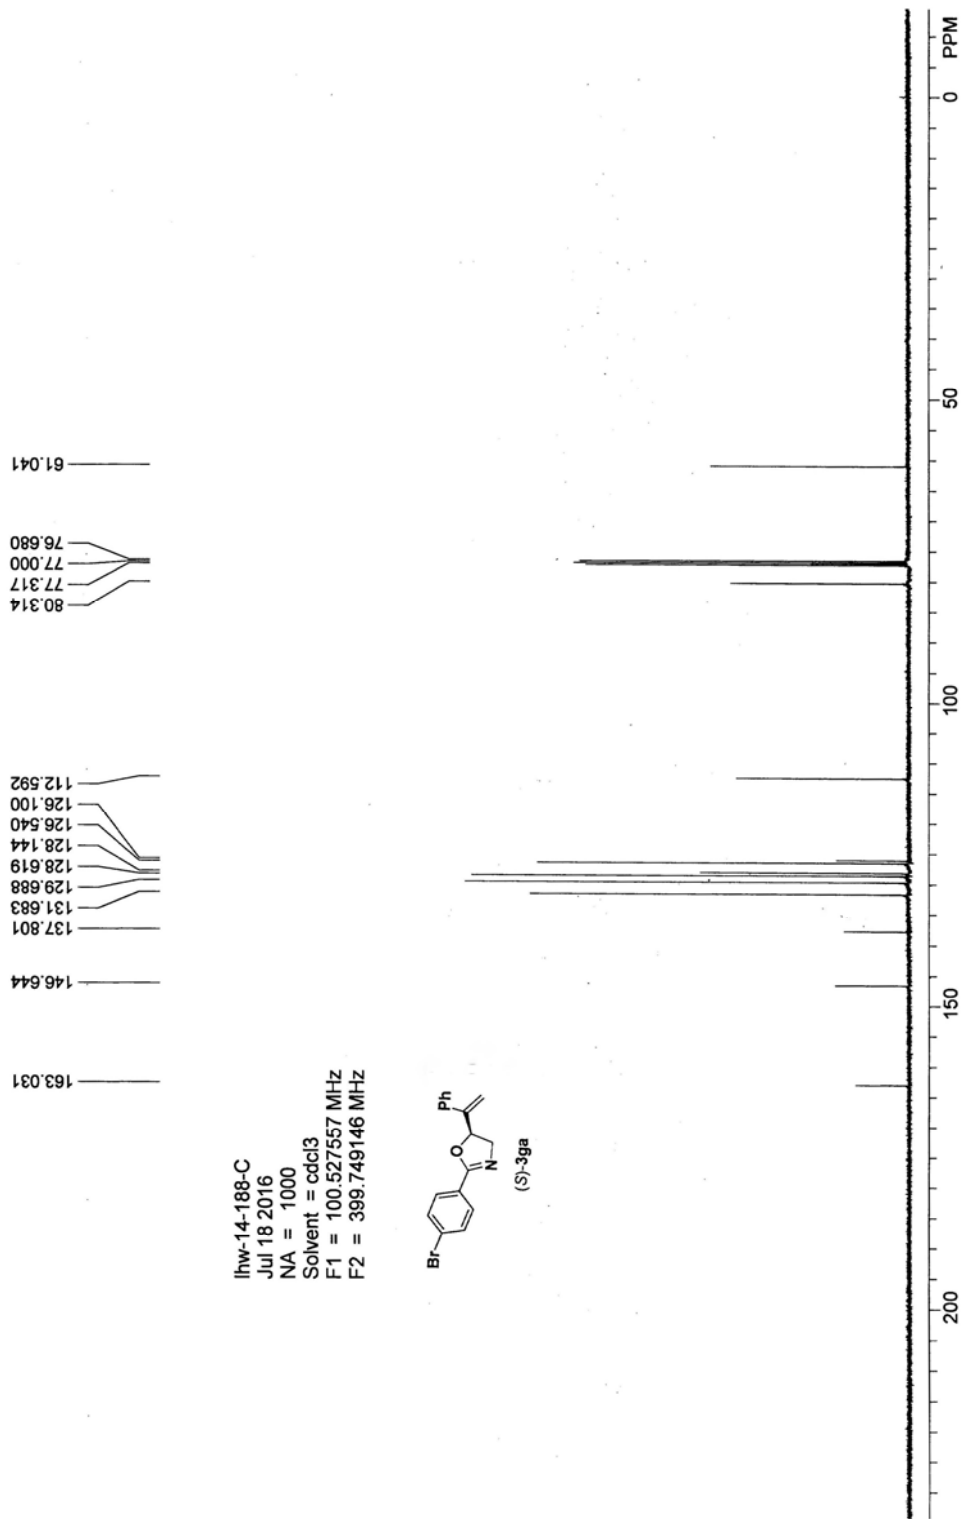

lhv-14-188-C  
Jul 18 2016  
NA = 1000  
Solvent = cdcl3  
F1 = 100.527557 MHz  
F2 = 399.749146 MHz

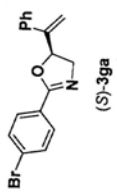

# 1hw-14-188

实验时间: 2016-07-12, 9:11:19  
谱图文件: F:\slf\luohongwen\2016-07-12\1hw-14-188\新建文件夹\1hw-14-188-oz-h-90+10-0.7-214.org

报告时间: 2016-07-12, 9:12:10

实验内容简介:  
OZ-H 95:5  
214nm 0.7ml/min

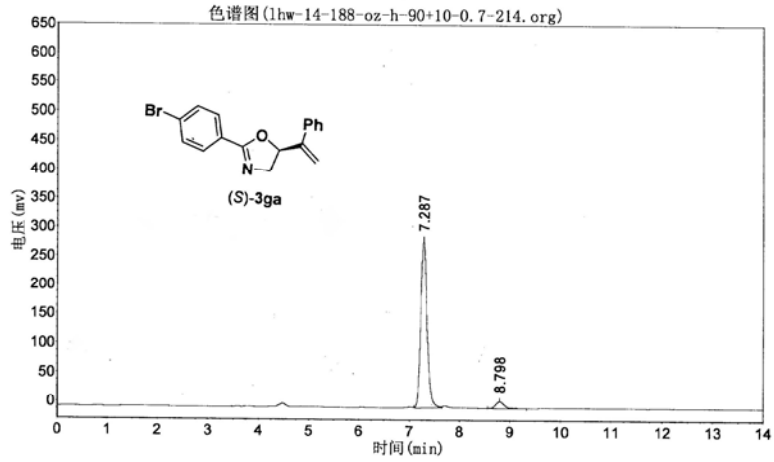

分析结果表

| 峰号 | 峰名 | 保留时间  | 峰高         | 峰面积         | 含量       |
|----|----|-------|------------|-------------|----------|
| 1  |    | 7.287 | 287831.219 | 2504232.500 | 95.2328  |
| 2  |    | 8.798 | 11601.377  | 125358.133  | 4.7672   |
| 总计 |    |       | 299432.596 | 2629590.633 | 100.0000 |

# lhw-14-188-rac

实验时间: 2016-07-12, 8:45:05

报告时间: 2016-07-12, 8:47:53

谱图文件: F:\sif\luohongwen\2016-07-12\lhw-14-188-rac\lhw-14-188-rac-oz-h-90+10-0.7-214.org

实验内容简介:  
OZ-H 95:5  
214nm 0.7ml/min

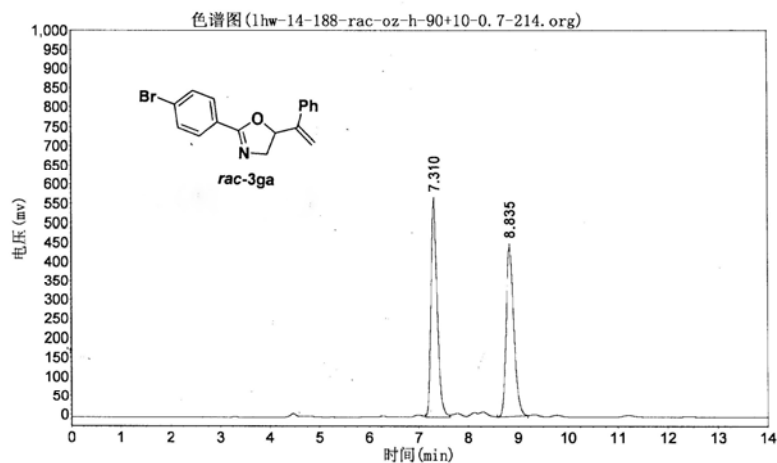

分析结果表

| 峰号 | 峰名 | 保留时间  | 峰高          | 峰面积         | 含量       |
|----|----|-------|-------------|-------------|----------|
| 1  |    | 7.310 | 564145.375  | 4919305.000 | 50.2941  |
| 2  |    | 8.835 | 441946.781  | 4861768.000 | 49.7059  |
| 总计 |    |       | 1006092.156 | 9781073.000 | 100.0000 |



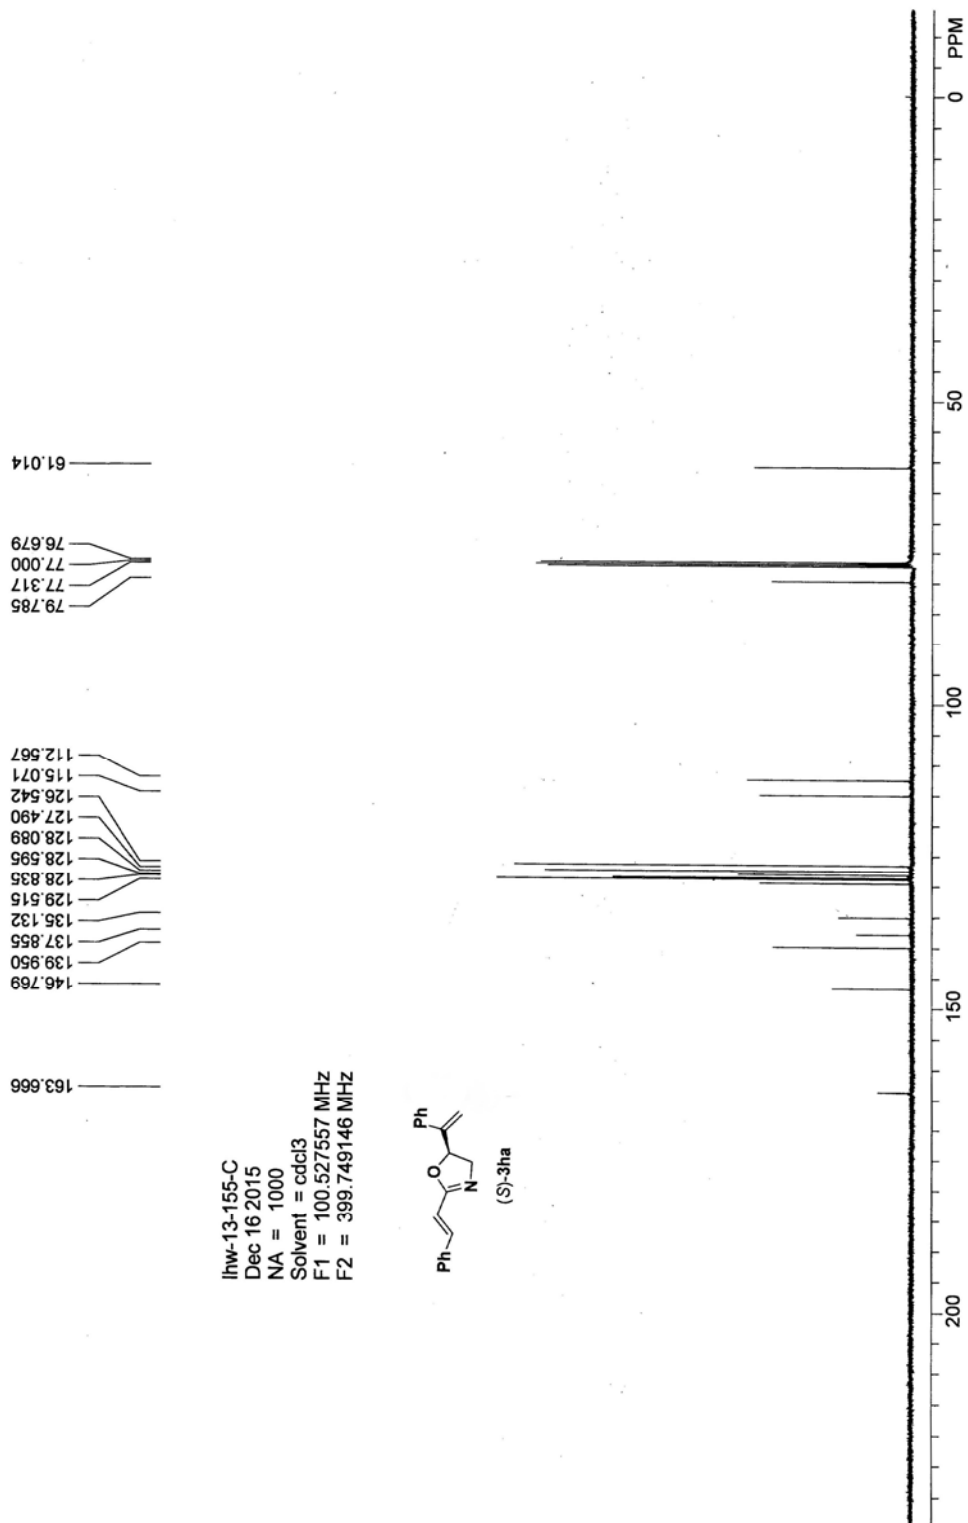

中国科学院上海有机化学研究所  
 Project Name: defaults for copy  
 Reported by User: Breeze user (Breeze)

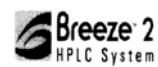

SAMPLE INFORMATION

|                   |                           |                  |                         |
|-------------------|---------------------------|------------------|-------------------------|
| Sample Name:      | lhw-13-155-az-h95-5-1-214 | Acquired By:     | Breeze                  |
| Sample Type:      | 未知                        | Date Acquired:   | 2015/12/24 16:28:23 CST |
| Vial:             | 1                         | Acq. Method:     | zg95                    |
| Injection#:       | 52                        | Date Processed:  | 2015/12/24 17:09:16 CST |
| Injection Volume: | 25.00 $\mu$ l             | Channel Name:    | W2489 ChA               |
| Run Time:         | 30.00 Minutes             | Channel Desc.:   | W2489 ChA.230nm         |
| Column Type:      |                           | Sample Set Name: |                         |

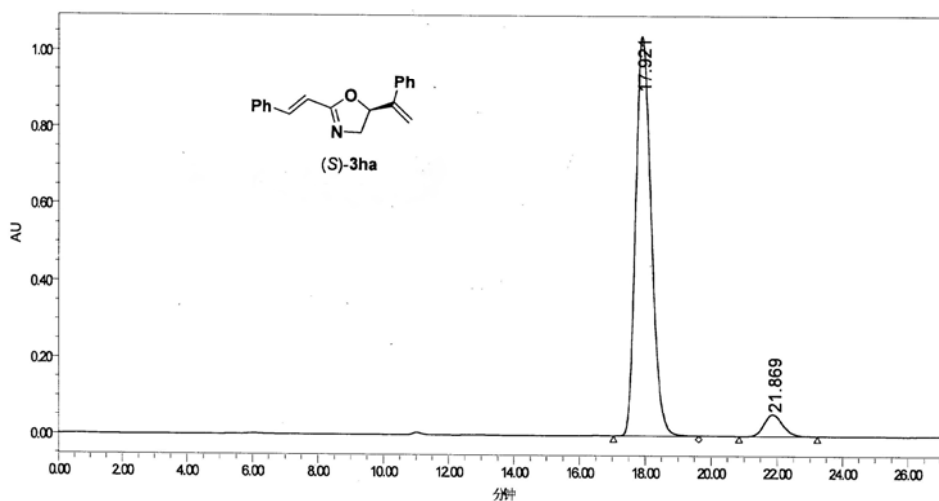

|   | RT (min) | Area (峰面积) | %Area | Hight (峰高) | % Hight |
|---|----------|------------|-------|------------|---------|
| 1 | 17.921   | 34097210   | 93.84 | 1040529    | 94.8%   |
| 2 | 21.869   | 2239799    | 6.16  | 55333      | 5.14    |

中国科学院上海有机化学研究所

Project Name: defaults for copy  
Reported by User: Breeze user (Breeze)

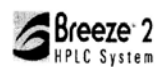

### SAMPLE INFORMATION

|                   |                       |                  |                         |
|-------------------|-----------------------|------------------|-------------------------|
| Sample Name:      | zy-197-az-h95-5-1-214 | Acquired By:     | Breeze                  |
| Sample Type:      | 未知                    | Date Acquired:   | 2015/12/24 15:58:41 CST |
| Val:              | 1                     | Acq. Method:     | zg95                    |
| Injection#:       | 51                    | Date Processed:  | 2015/12/24 17:08:44 CST |
| Injection Volume: | 25.00 $\mu$ l         | Channel Name:    | VI2489 ChA              |
| Run Time:         | 60.00 Minutes         | Channel Desc.:   | VI2489 ChA.230mm        |
| Column Type:      |                       | Sample Set Name: |                         |

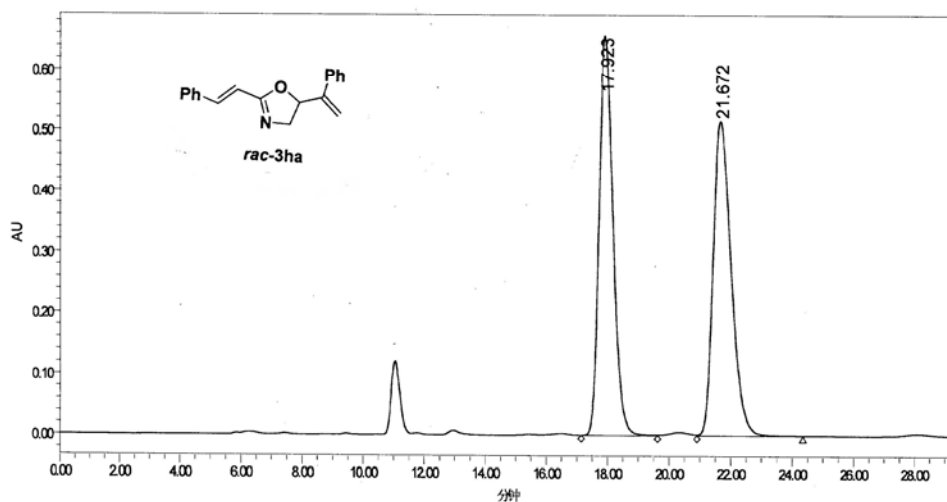

|   | RT (min) | Area (峰sec) | %Area | Height (峰) | % Height |
|---|----------|-------------|-------|------------|----------|
| 1 | 17.923   | 20870784    | 49.88 | 657395     | 56.02    |
| 2 | 21.672   | 20969029    | 50.12 | 516141     | 43.98    |

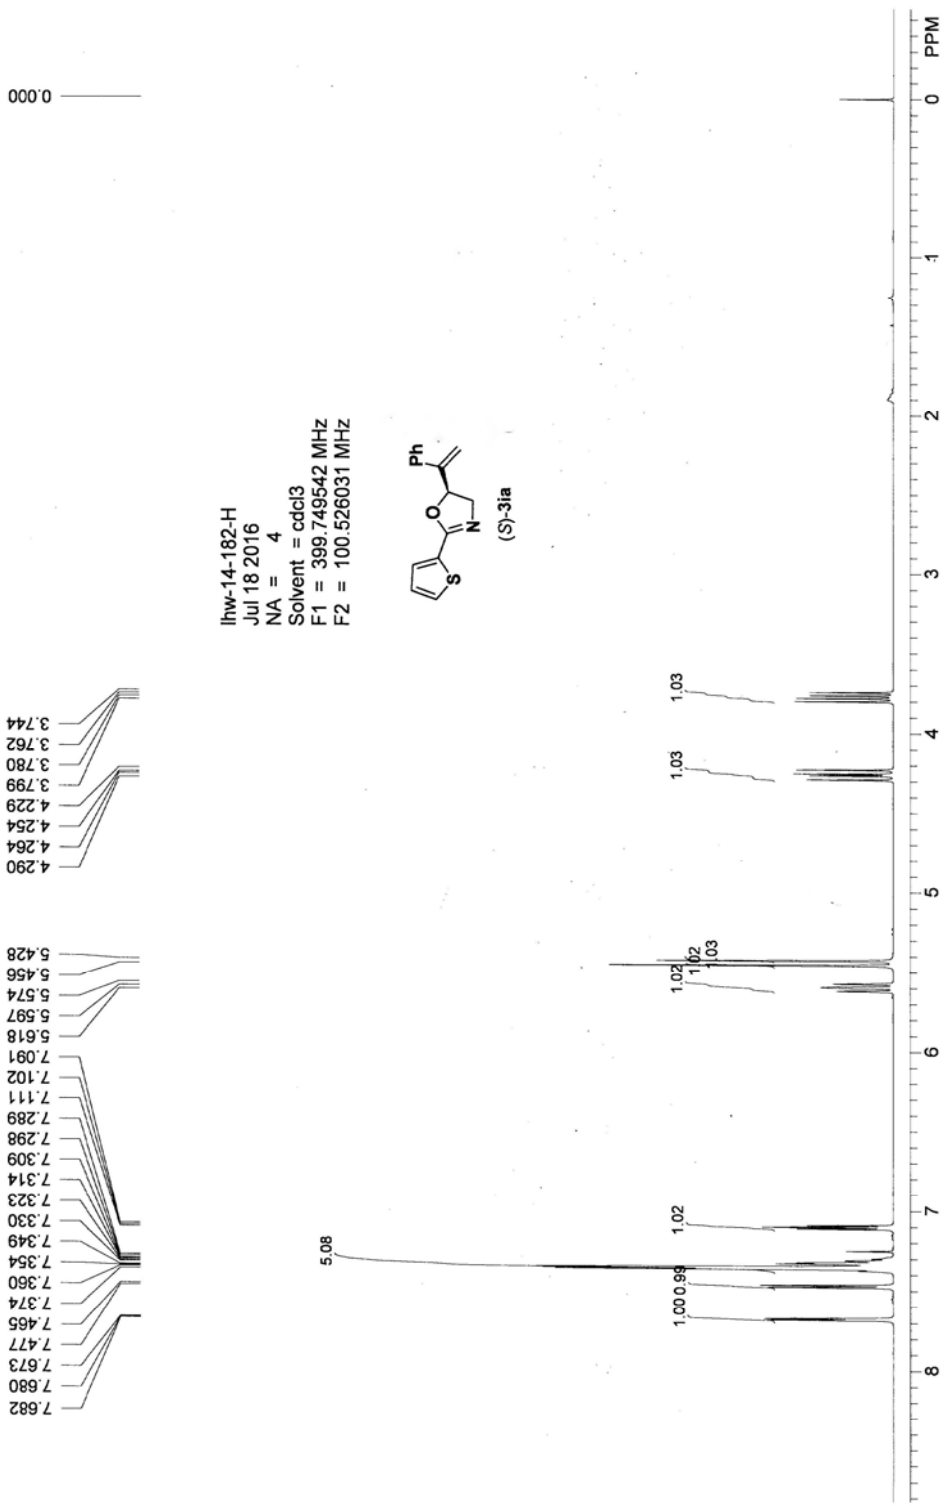



lhv-14-182-C  
Jul 19 2016  
NA = 1000  
Solvent = cdcl3  
F1 = 100.527557 MHz  
F2 = 399.749146 MHz

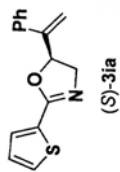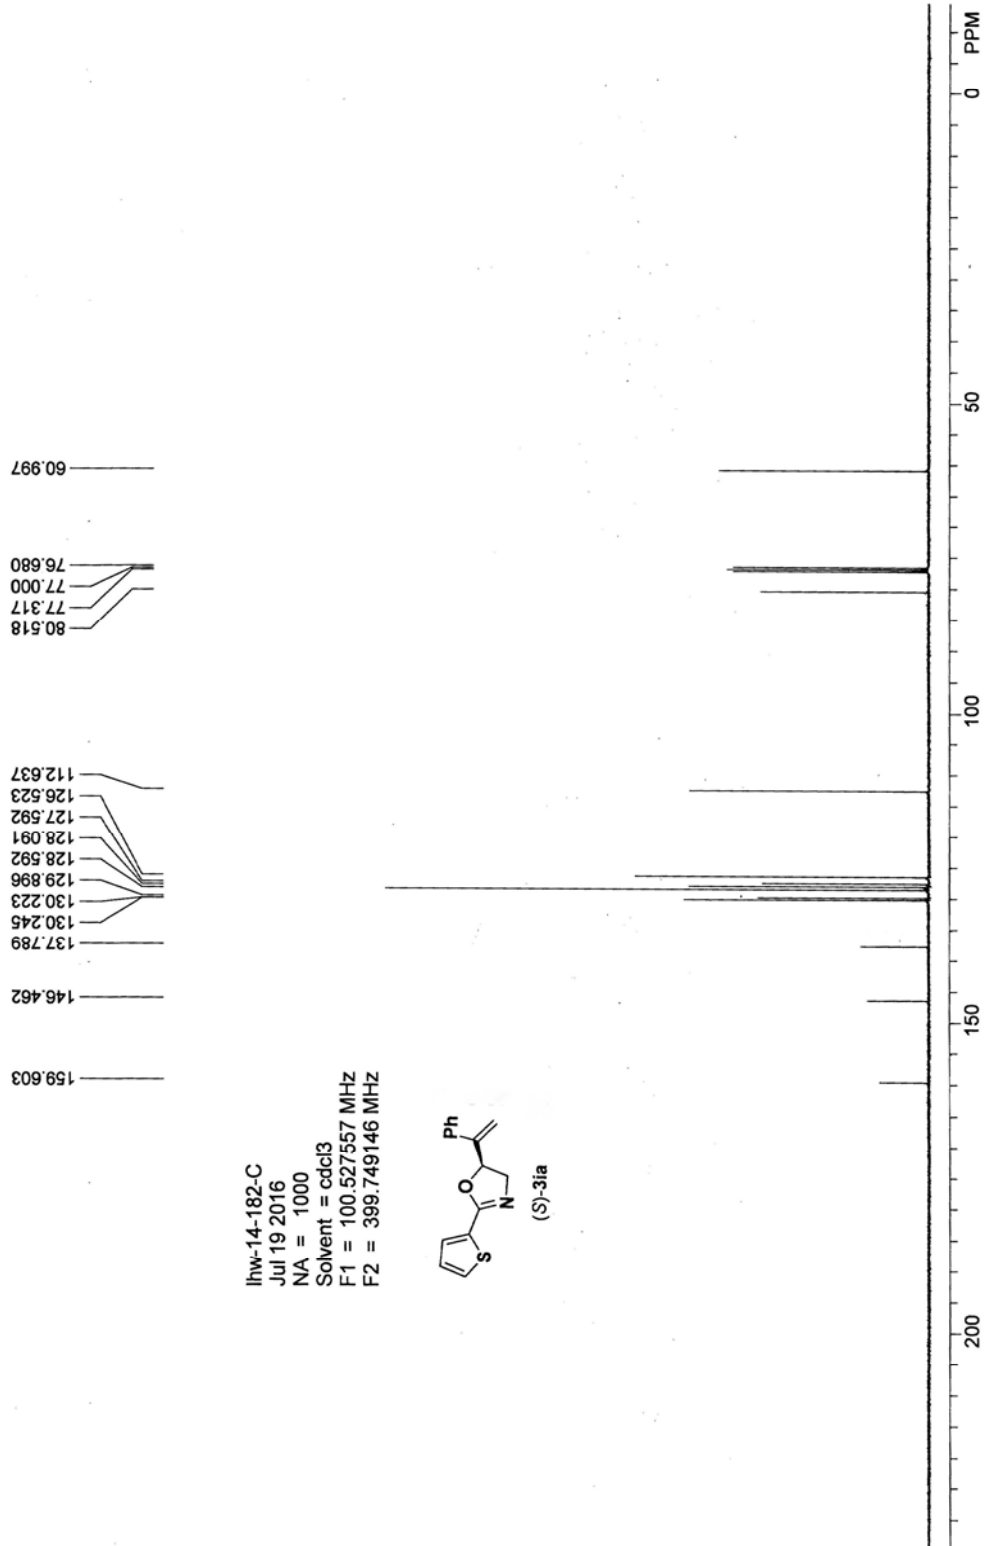

# 1hw-14-182

实验时间: 2016-07-15, 15:36:01

报告时间: 2016-07-15, 15:49:30

谱图文件: F:\slf\luohongwen\2016-07-15\1hw-14-182\1hw-14-182-OZ-H-90+10-214-1.0.org

实验内容简介:  
OZ-H 90:10  
214nm 1.0ml/min

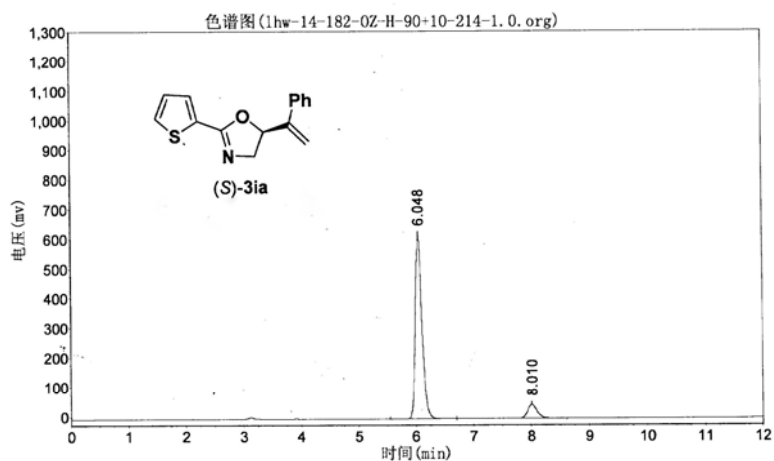

分析结果表

| 峰号 | 峰名 | 保留时间  | 峰高         | 峰面积         | 含量       |
|----|----|-------|------------|-------------|----------|
| 1  |    | 6.048 | 621283.375 | 4959325.500 | 90.6139  |
| 2  |    | 8.010 | 45734.953  | 513706.281  | 9.3861   |
| 总计 |    |       | 667018.328 | 5473031.781 | 100.0000 |

# 1hw-14-182-rac

实验时间: 2016-07-15, 15:28:30

报告时间: 2016-07-15, 15:26:07

谱图文件: F:\s1f\luohongwen\2016-07-15\1hw-14-182-rac\1hw-14-182-rac-OZ-H-90+10-214-1.0.org

实验内容简介:  
OZ-H 90:10  
214nm 1.0ml/min

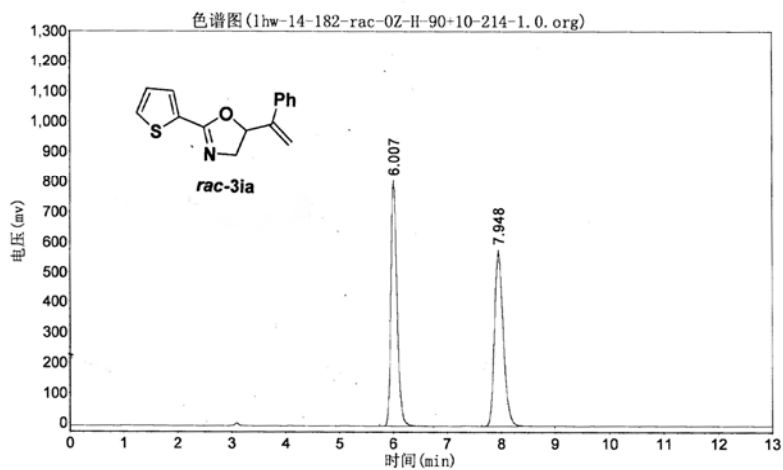

分析结果表

| 峰号 | 峰名 | 保留时间  | 峰高          | 峰面积          | 含量       |
|----|----|-------|-------------|--------------|----------|
| 1  |    | 6.007 | 802578.375  | 6504013.500  | 49.9751  |
| 2  |    | 7.948 | 573096.313  | 6510507.500  | 50.0249  |
| 总计 |    |       | 1375674.688 | 13014521.000 | 100.0000 |

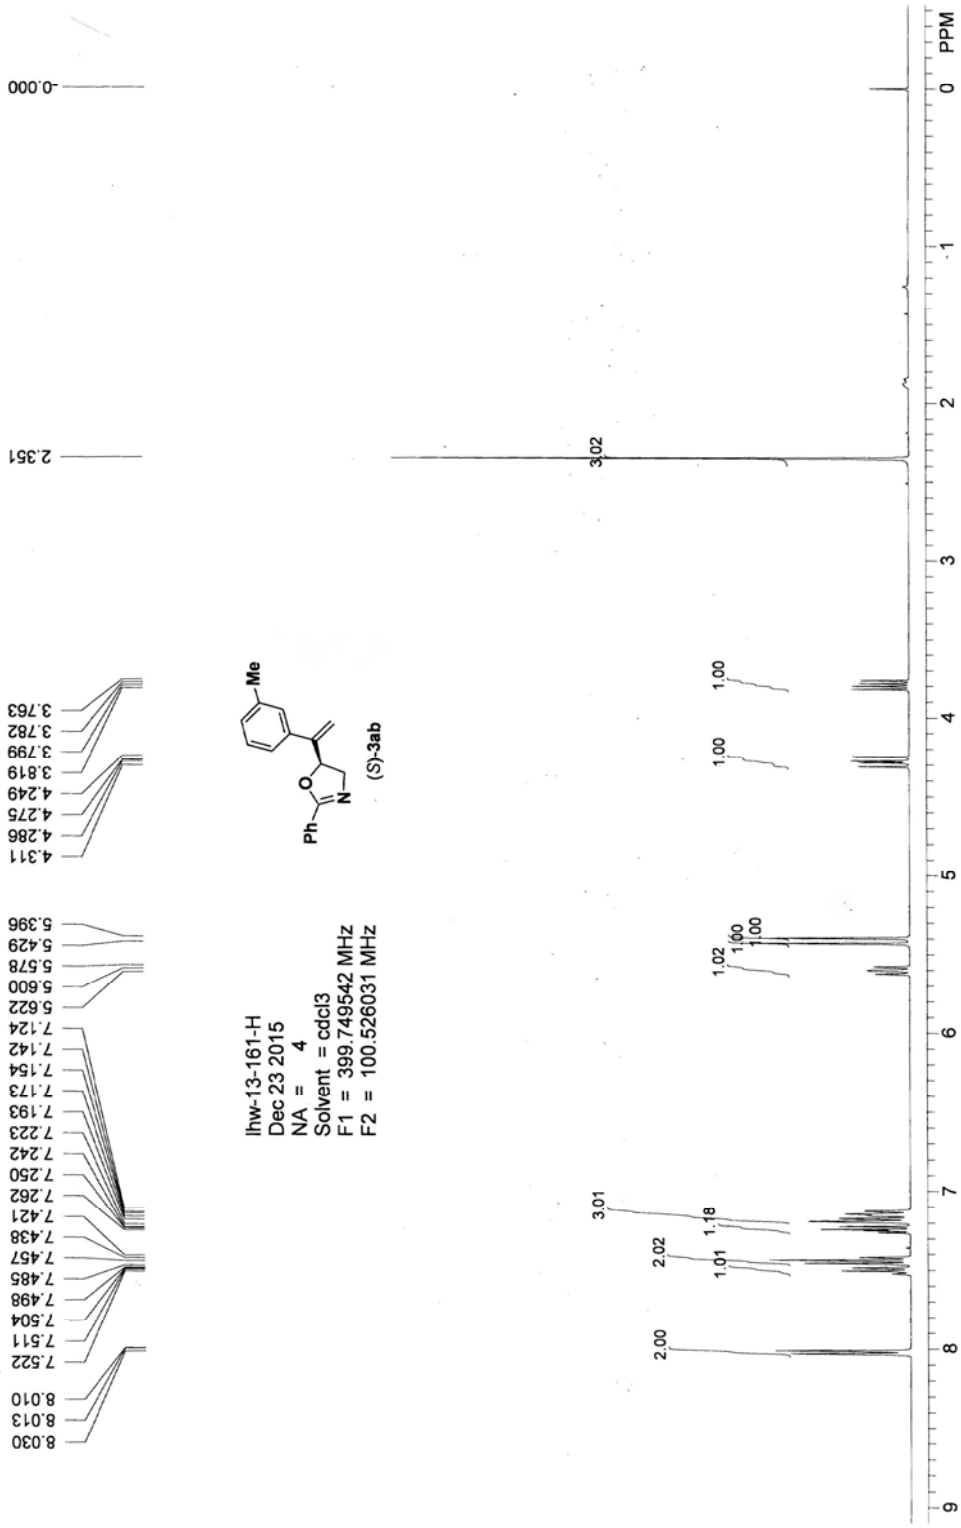

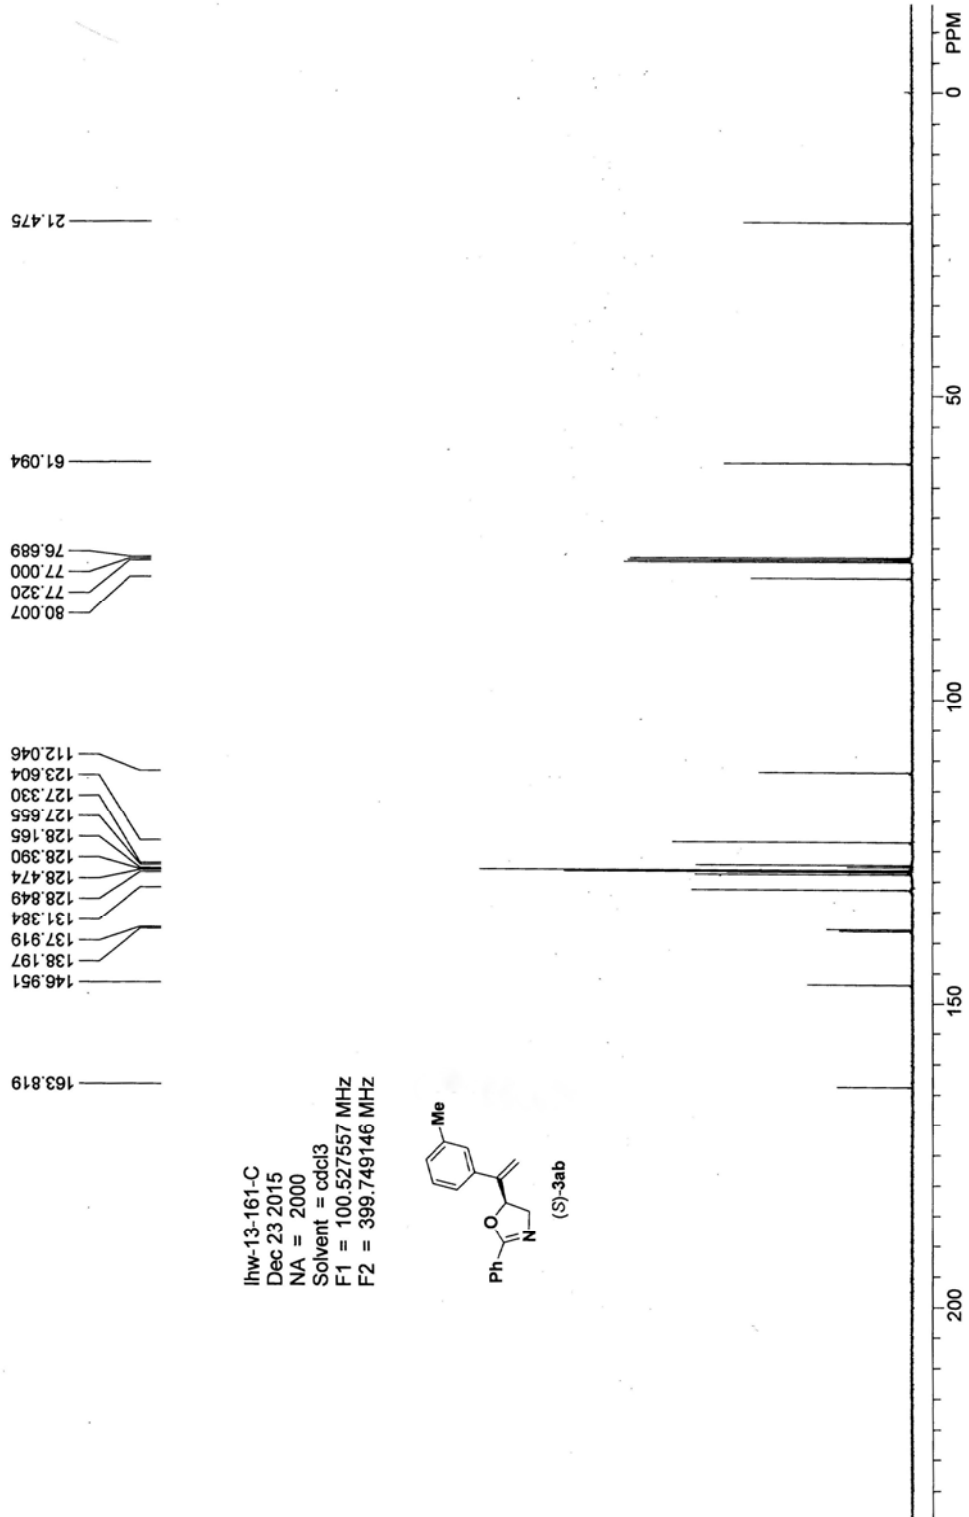

Ihw-13-161-C  
 Dec 23 2015  
 NA = 2000  
 Solvent = cdcl3  
 F1 = 100.527557 MHz  
 F2 = 399.749146 MHz

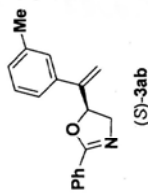

**SAMPLE INFORMATION**

|                   |                             |                  |                       |
|-------------------|-----------------------------|------------------|-----------------------|
| Sample Name:      | lhw-13-161-ad-h-100-1-1-214 | Acquired By:     | Breeze                |
| Sample Type:      | 未知                          | Date Acquired:   | 2016/1/4 15:13:55 CST |
| Vial:             | 1                           | Acq. Method:     | zgj001                |
| Injection #:      | 7                           | Date Processed:  | 2016/1/5 16:46:50 CST |
| Injection Volume: | 25.00 $\mu$ l               | Channel Name:    | V02489 ChA            |
| Run Time:         | 40.00 Minutes               | Channel Desc.:   | V02489 ChA.230mm      |
| Column Type:      |                             | Sample Set Name: |                       |

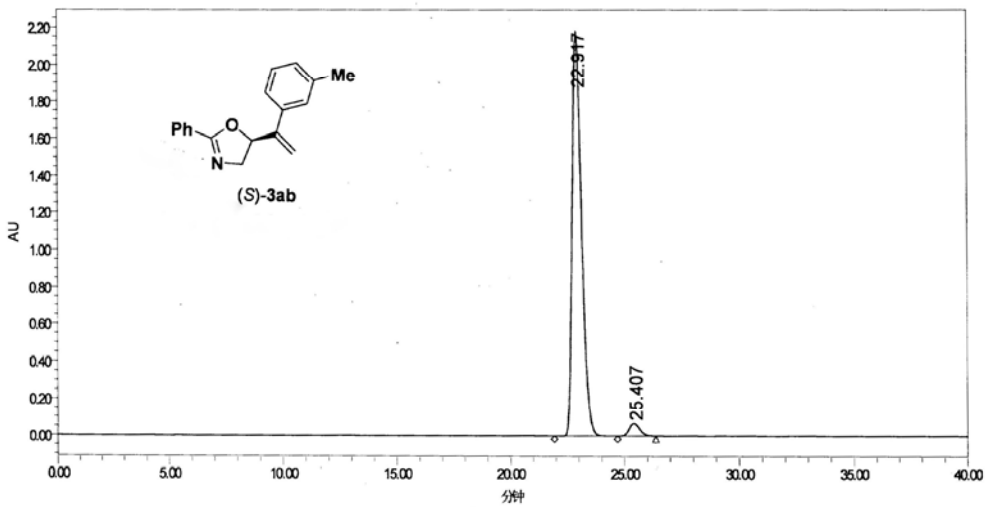

| RT (min) | Area (峰面积) | %Area | Height (峰高) | % Height |
|----------|------------|-------|-------------|----------|
| 1 22.917 | 63291658   | 96.70 | 2183573     | 97.01    |
| 2 25.407 | 2163222    | 3.30  | 67376       | 2.99     |

中国科学院上海有机化学研究所  
 Project Name: defaults for copy  
 Reported by User: Breeze user (Breeze)

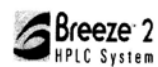

SAMPLE INFORMATION

|                  |                          |                 |                       |
|------------------|--------------------------|-----------------|-----------------------|
| Sample Name      | zy-1-145-adh-100-1-1-214 | Acquired By:    | Breeze                |
| Sample Type      | 未知                       | Date Acquired   | 2016/1/4 14:40:34 CST |
| Val:             | 1                        | Acq Method      | zg1001                |
| Injection#       | 6                        | Date Processed  | 2016/1/5 16:46:28 CST |
| Injection Volume | 25.00 ul                 | Channel Name    | V0489 ChA             |
| Run Time         | 30.00 Minutes            | Channel Desc:   | V0489 ChA.230nm       |
| Column Type      |                          | Sample Set Name |                       |

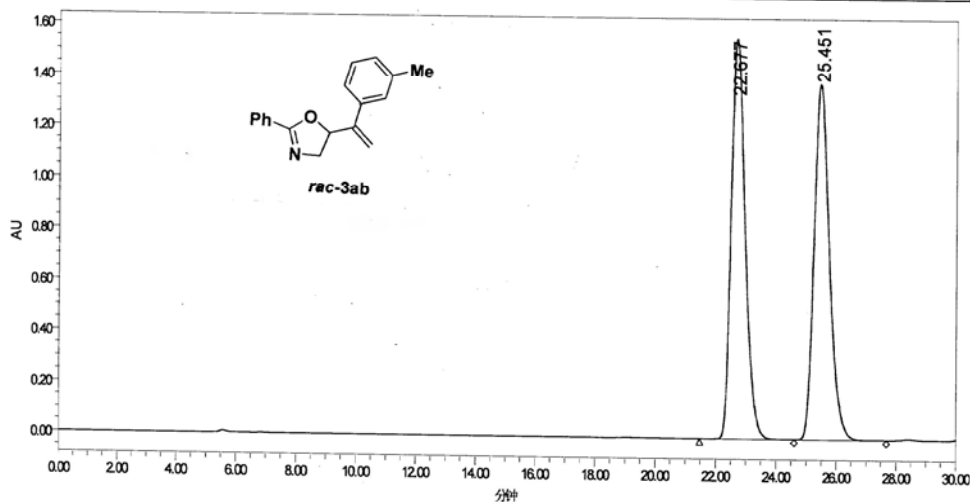

| RT (min) | Area (AU*sec) | %Area | Hight (AU) | % Hight |
|----------|---------------|-------|------------|---------|
| 1 22.677 | 49725571      | 50.17 | 1558964    | 52.98   |
| 2 25.451 | 49385566      | 49.83 | 1383326    | 47.02   |

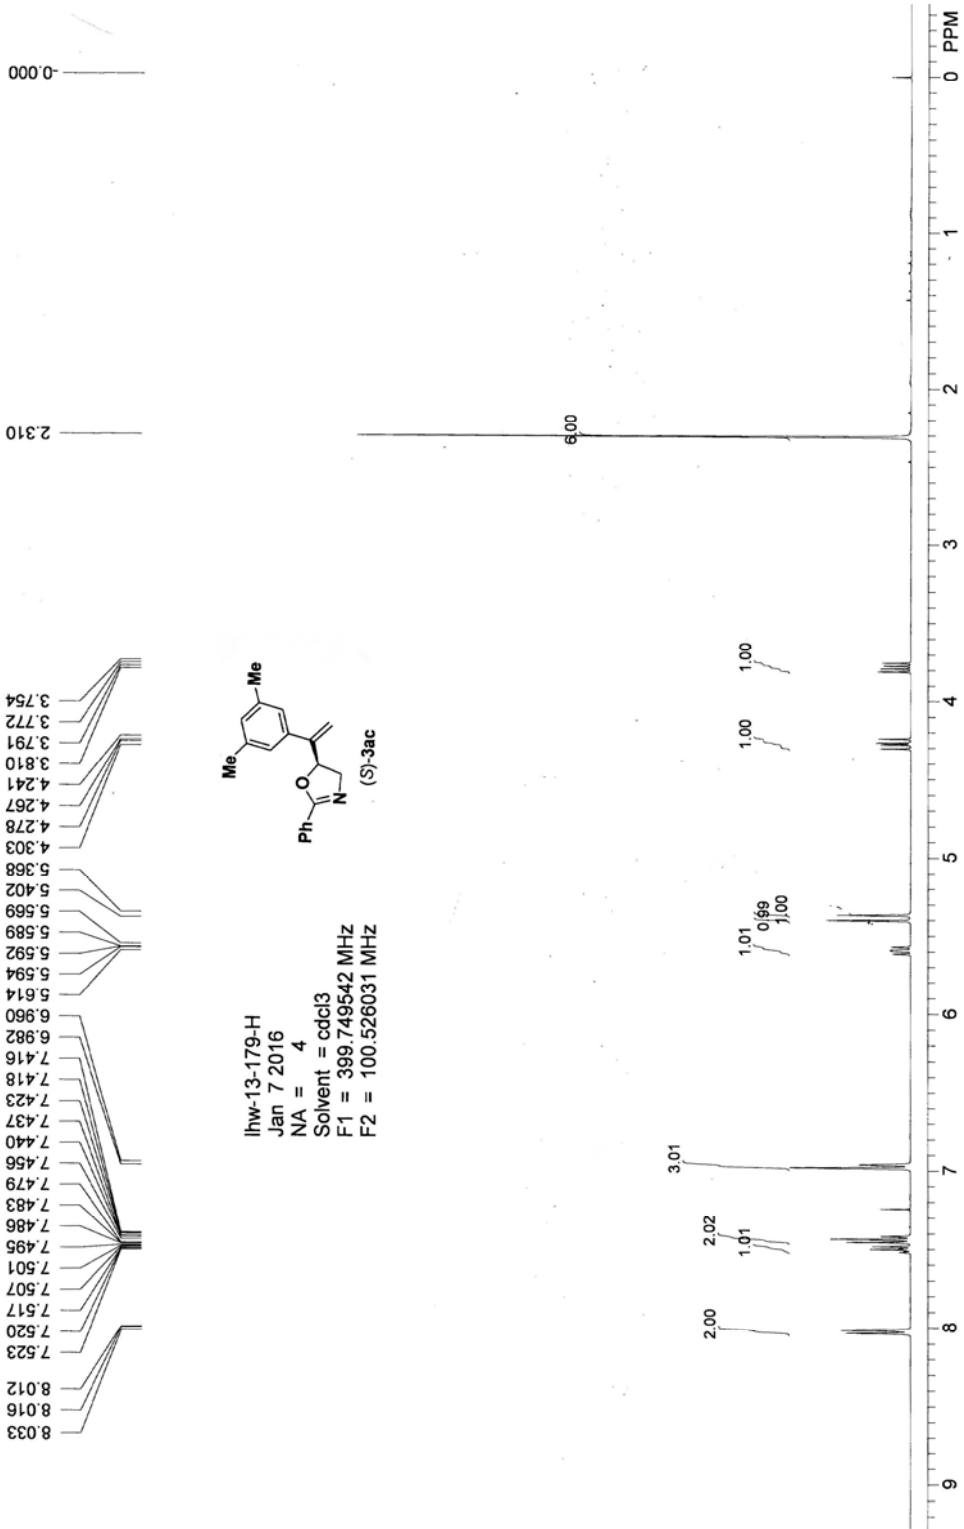



lhwr-13-179-C  
Jan 7 2016  
NA = 1000  
Solvent = cdcl3  
F1 = 100.527557 MHz  
F2 = 399.749146 MHz

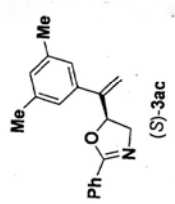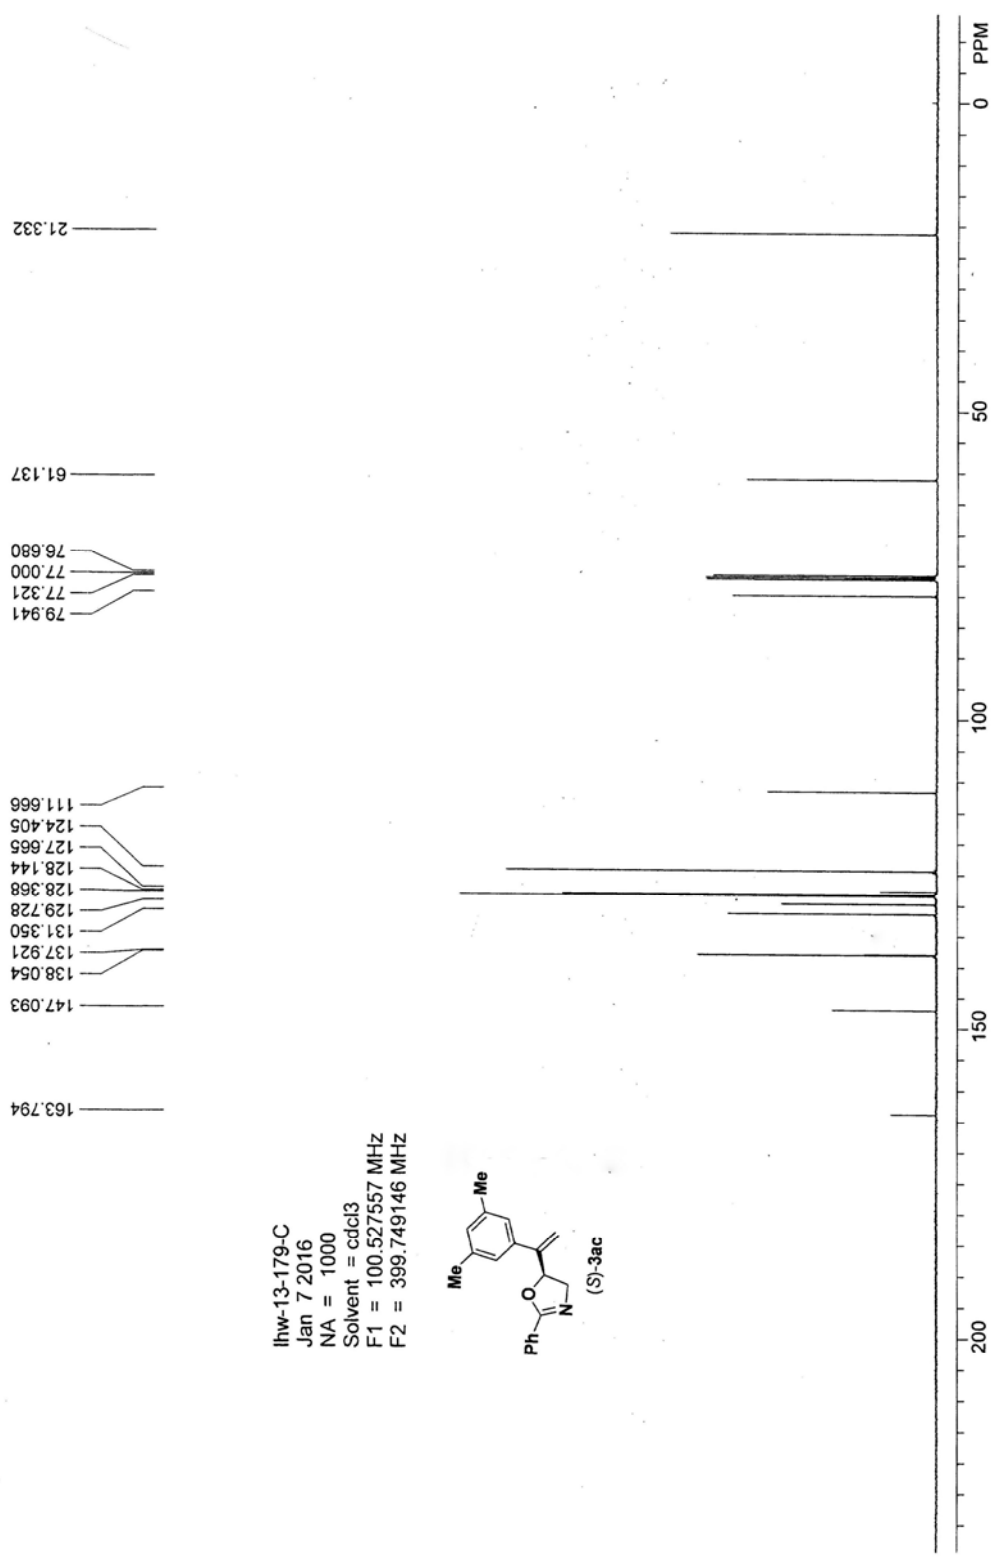

**SAMPLE INFORMATION**

|                  |                            |                 |                        |
|------------------|----------------------------|-----------------|------------------------|
| Sample Name      | lhw-13-179-az-h90-10-1-214 | Acquired By:    | Breeze                 |
| Sample Type      | 未知                         | Date Acquired   | 2016/1/15 14:04:24 CST |
| Vial:            | 1                          | Acq. Method     | zq90                   |
| Injection #      | 39                         | Date Processed  | 2016/1/15 17:12:42 CST |
| Injection Volume | 25.00 u                    | Channel Name    | V02489 ChA             |
| Run Time         | 15.00 Minutes              | Channel Desc.:  | V02489 ChA.214nm       |
| Column Type      |                            | Sample Set Name |                        |

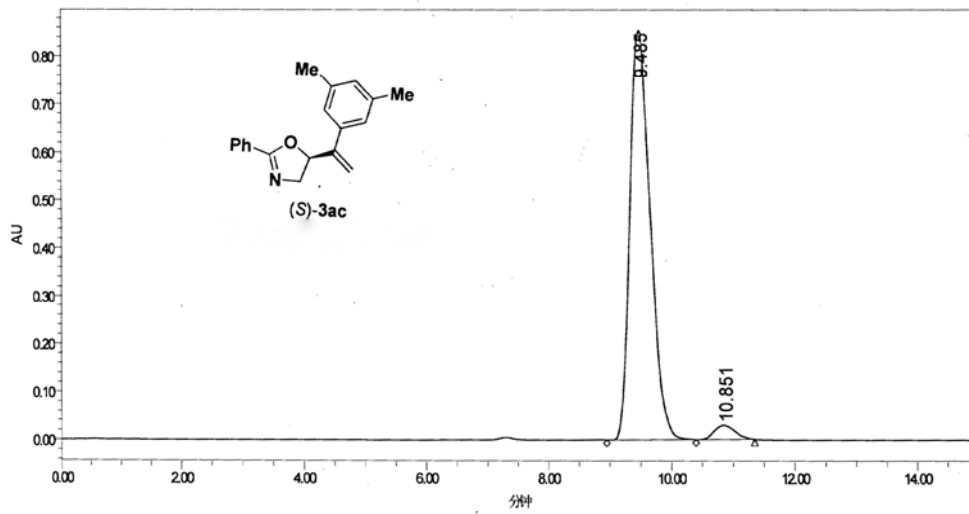

|   | RT (min) | Area (峰面积) | %Area | Height (峰高) | % Height |
|---|----------|------------|-------|-------------|----------|
| 1 | 9.486    | 19669687   | 96.57 | 853756      | 96.67    |
| 2 | 10.851   | 697523     | 3.43  | 29394       | 3.33     |

中国科学院上海有机化学研究所

Project Name: defaults for copy  
Reported by User: Breeze user (Breeze)

**Breeze 2**  
HPLC System

### SAMPLE INFORMATION

|                   |                                         |                  |                        |
|-------------------|-----------------------------------------|------------------|------------------------|
| Sample Name:      | lhw-13-179-rac- $\alpha$ -h-90-10-1-214 | Acquired By:     | Breeze                 |
| Sample Type:      | 未知                                      | Date Acquired:   | 2016/1/15 12:25:37 CST |
| Val:              | 1                                       | Acq Method:      | zg90                   |
| Injection #:      | 37                                      | Date Processed:  | 2016/1/15 17:12:12 CST |
| Injection Volume: | 25.00 $\mu$ l                           | Channel Name:    | W2489 ChA              |
| Run Time:         | 15.00 Minutes                           | Channel Desc.:   | W2489 ChA.214mm        |
| Column Type:      |                                         | Sample Set Name: |                        |

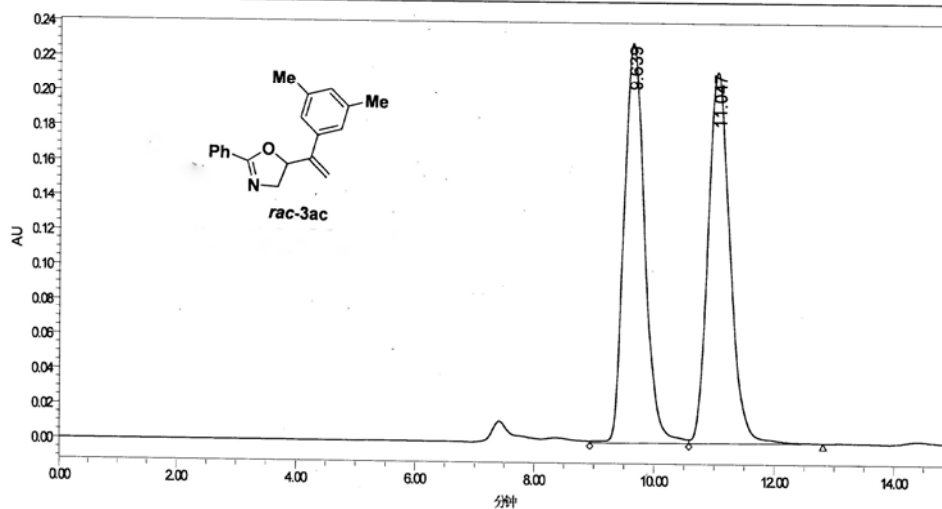

| RT (min) | Area (峰面积) | %Area | Height (峰高) | % Height |
|----------|------------|-------|-------------|----------|
| 1 9.636  | 5499666    | 50.36 | 229573      | 51.86    |
| 2 11.047 | 5421027    | 49.64 | 213065      | 48.14    |



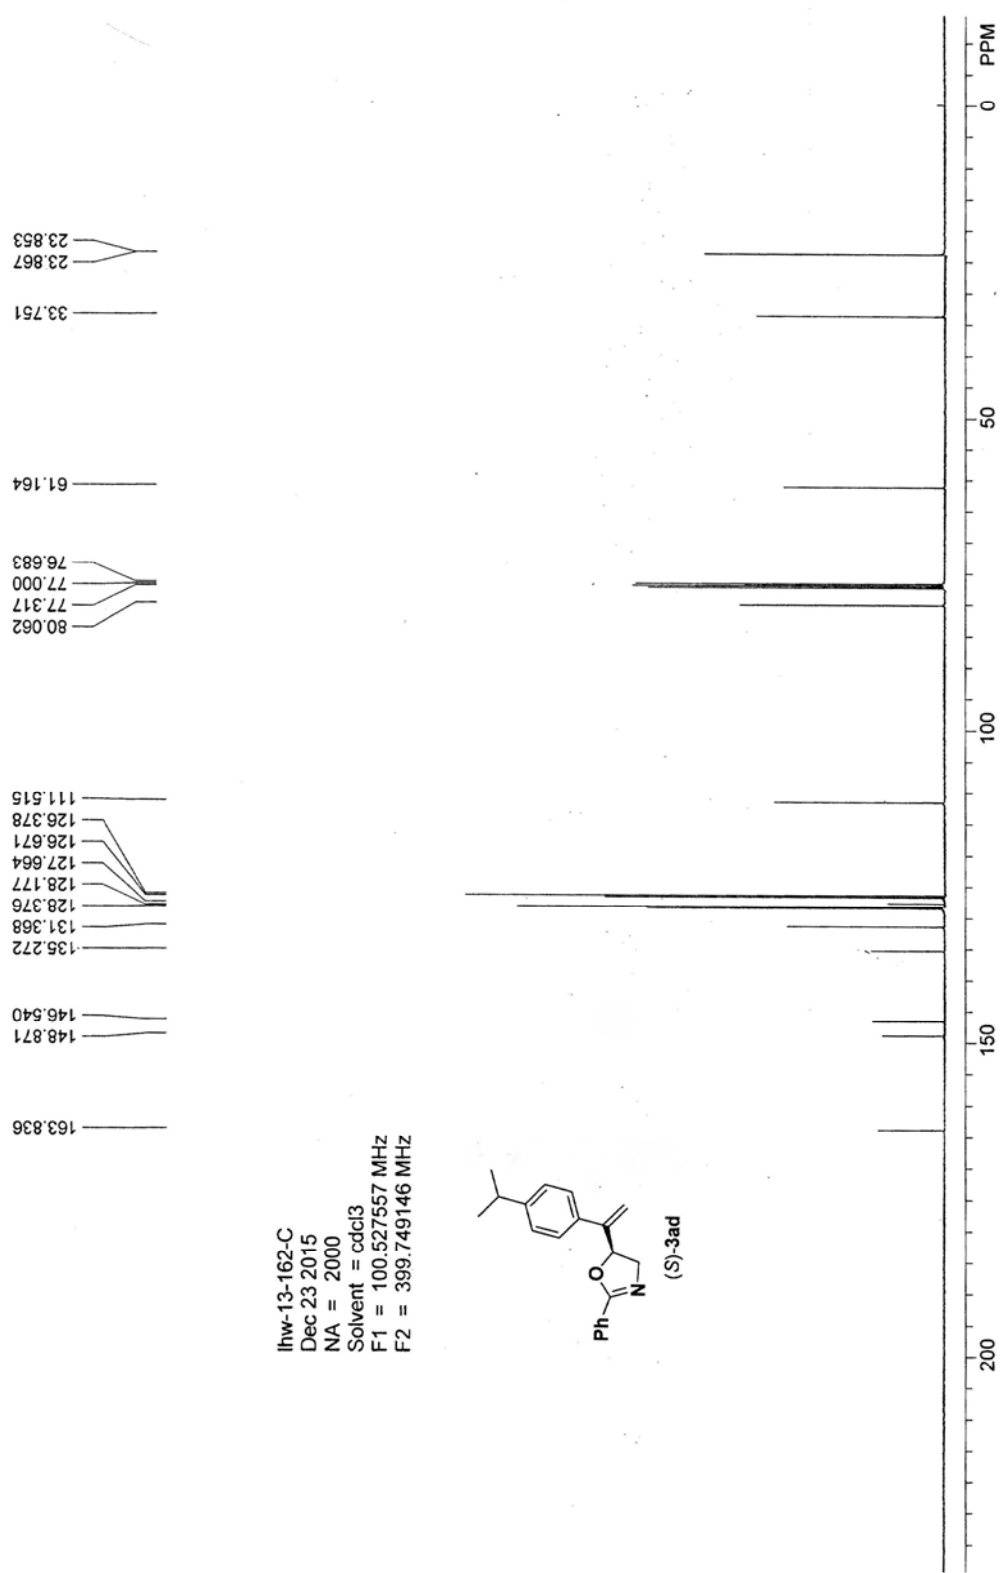

lhw-13-162-C  
 Dec 23 2015  
 NA = 2000  
 Solvent = cdcl3  
 F1 = 100.527557 MHz  
 F2 = 399.749146 MHz

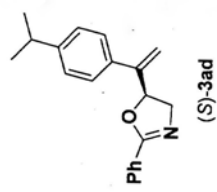

中国科学院上海有机化学研究所

Project Name: defaults for copy

Reported by User: Breeze user (Breeze)

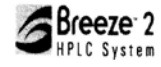

### SAMPLE INFORMATION

|                   |                            |                  |                       |
|-------------------|----------------------------|------------------|-----------------------|
| Sample Name:      | lhw-13-162-az-h-95-5-1-214 | Acquired By:     | Breeze                |
| Sample Type:      | 未知                         | Date Acquired:   | 2016/1/6 10:31:30 CST |
| Vial:             | 1                          | Acq. Method:     | zgj95                 |
| Injection #:      | 23                         | Date Processed:  | 2016/1/6 17:25:16 CST |
| Injection Volume: | 25.00 $\mu$ l              | Channel Name:    | V2489 ChA             |
| Run Time:         | 60.00 Minutes              | Channel Desc.:   | V2489 ChA.230nm       |
| Column Type:      |                            | Sample Set Name: |                       |

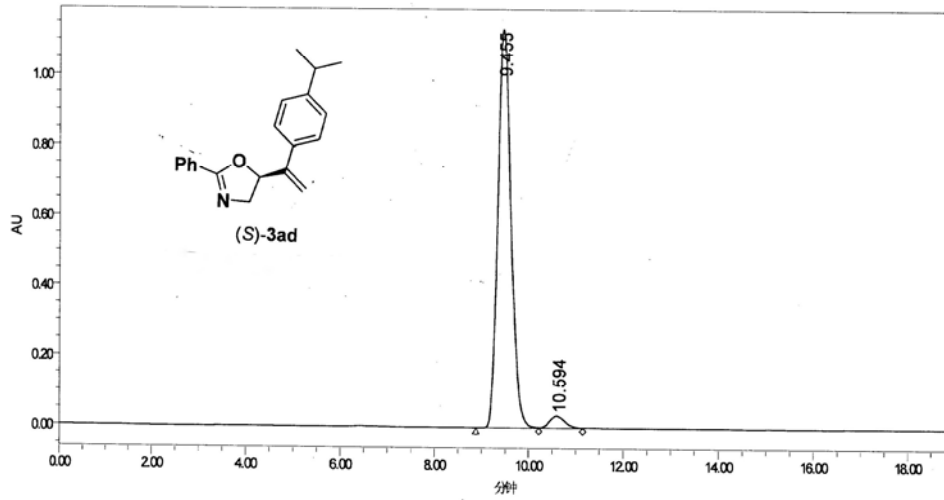

| RT (min) | Area (AUsec) | %Area    | Height (AU) | % Height |       |
|----------|--------------|----------|-------------|----------|-------|
| 1        | 9.456        | 22320241 | 96.58       | 1135168  | 97.06 |
| 2        | 10.594       | 788140   | 3.41        | 34478    | 2.96  |

| SAMPLE INFORMATION |                          |                  |                       |
|--------------------|--------------------------|------------------|-----------------------|
| Sample Name:       | zy-1-146-cz-h-95-5-1-214 | Acquired By:     | Breeze                |
| Sample Type:       | 未知                       | Date Acquired:   | 2016/1/6 10:52:14 CST |
| Vial:              | 1                        | Acq. Method:     | zg95                  |
| Injection #:       | 24                       | Date Processed:  | 2016/1/6 17:25:30 CST |
| Injection Volume:  | 25.00 u                  | Channel Name:    | V2489 ChA             |
| Run Time:          | 20.00 Minutes            | Channel Desc.:   | V2489 ChA.230mm       |
| Column Type:       |                          | Sample Set Name: |                       |

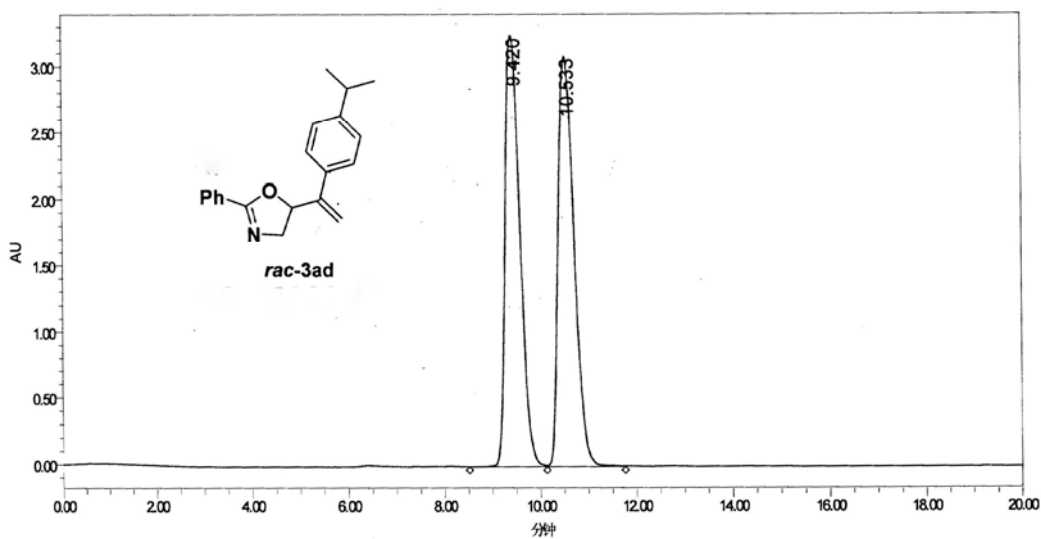

|   | RT (min) | Area (峰面积) | %Area | Height (峰高) | % Height |
|---|----------|------------|-------|-------------|----------|
| 1 | 9.420    | 70115206   | 49.71 | 3249301     | 51.27    |
| 2 | 10.533   | 70937311   | 50.29 | 3088755     | 48.73    |

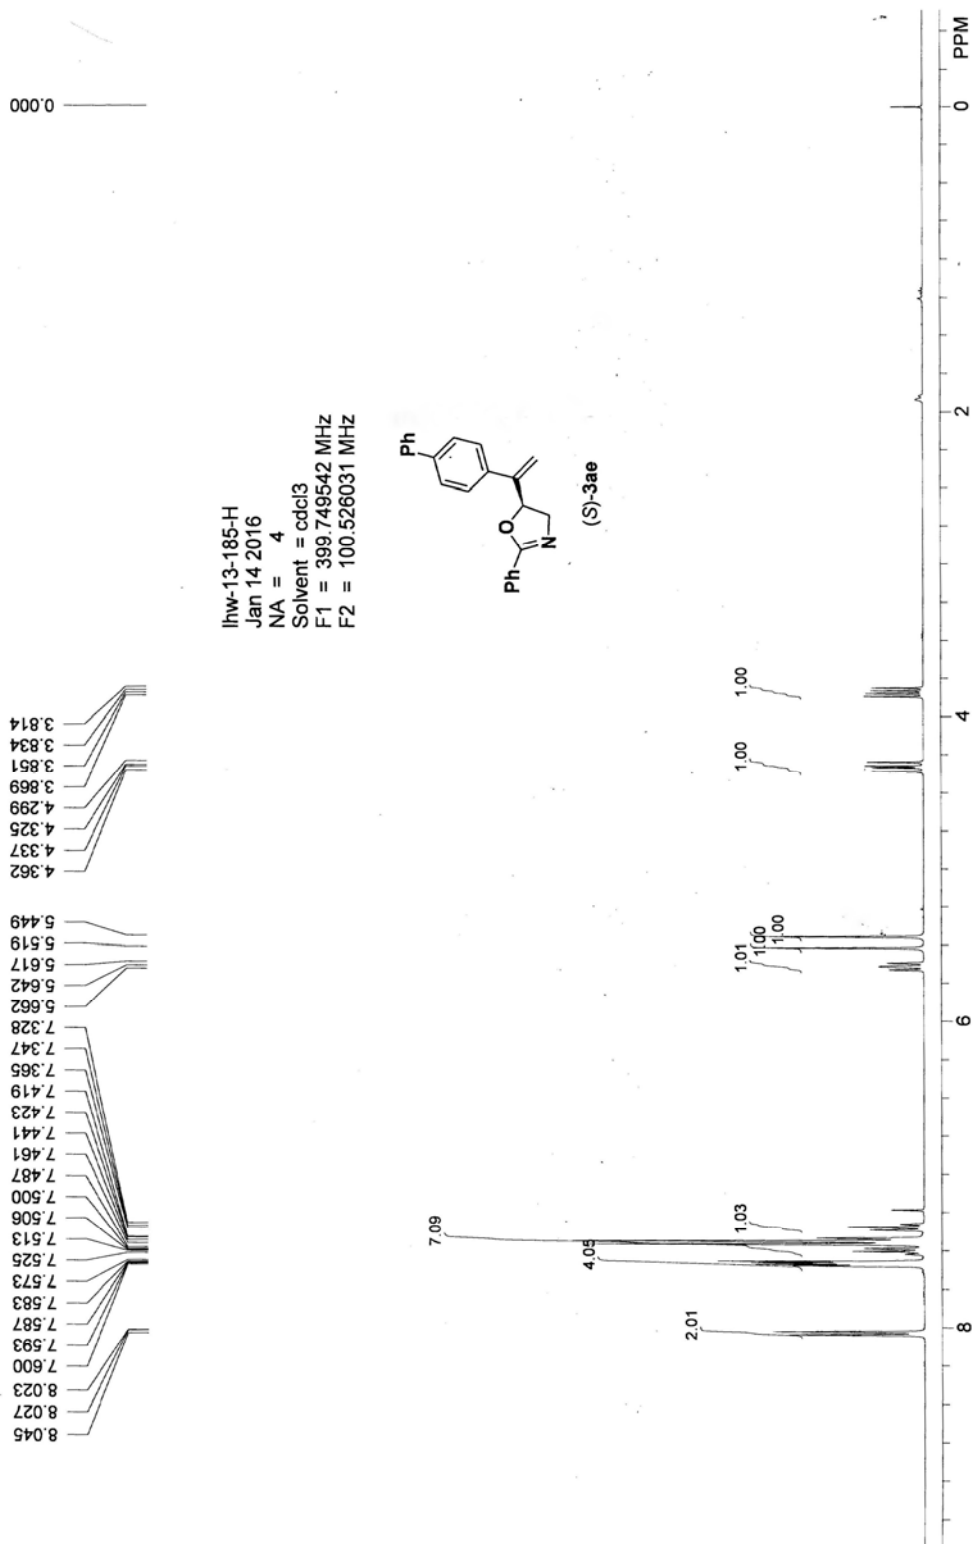



lhv-13-185-C  
Jan 14 2016  
NA = 512  
Solvent = cdcl3  
F1 = 100.527557 MHz  
F2 = 399.749146 MHz

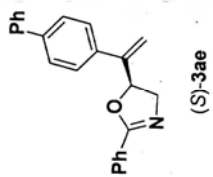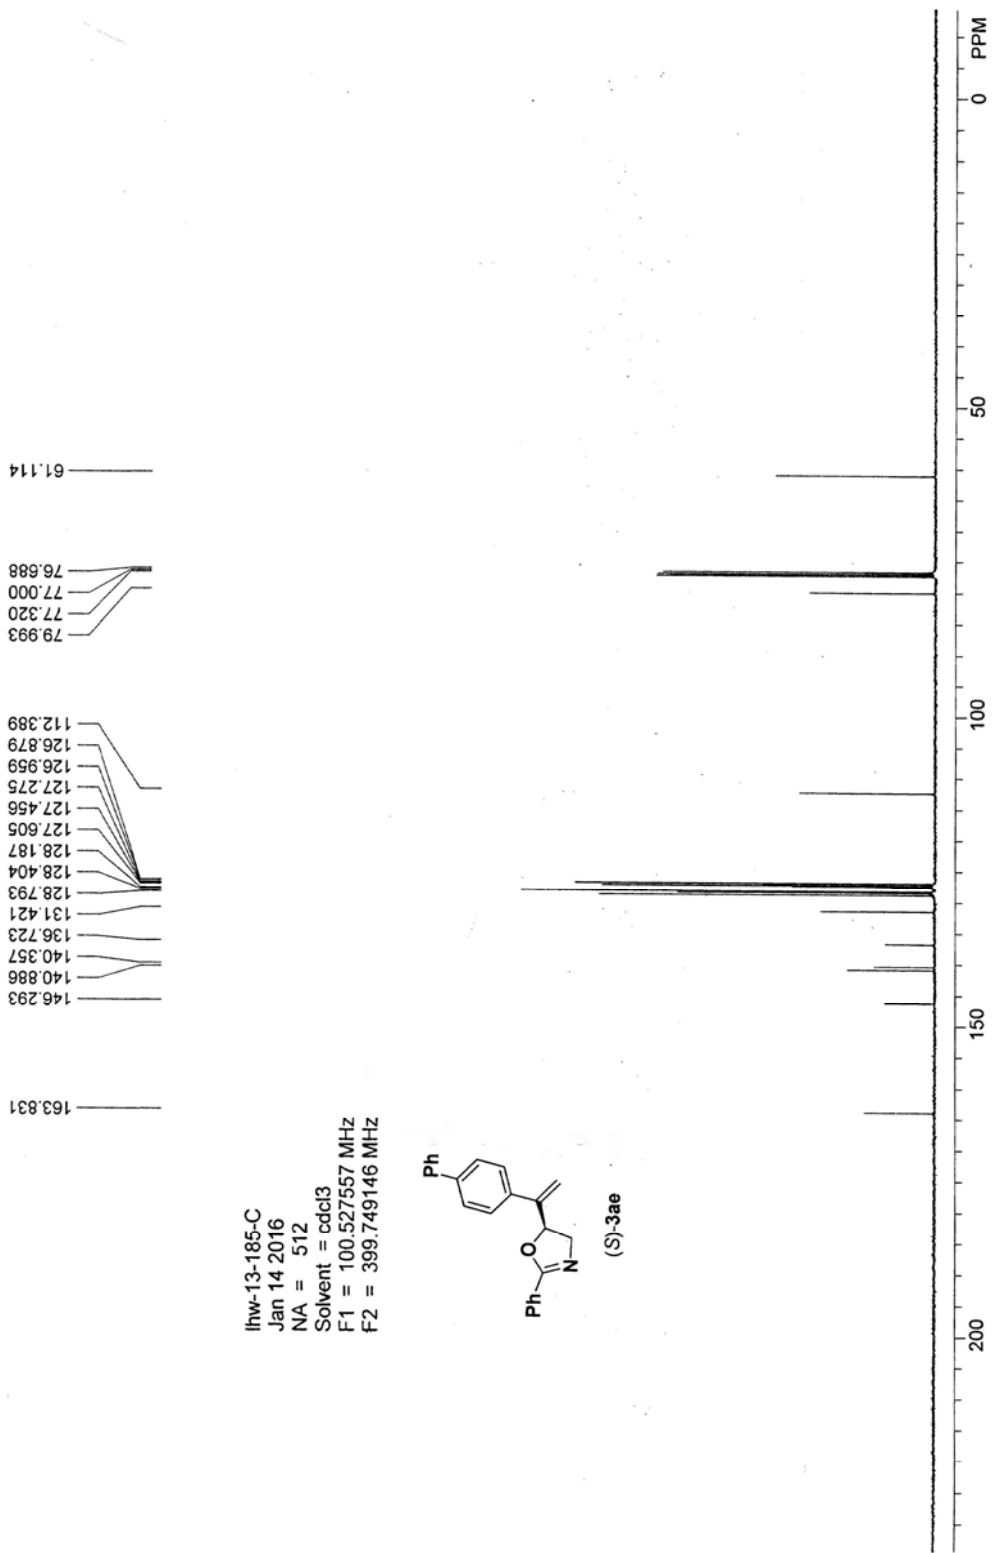

Data File C:\CHEM32\1\DATA\2014-43117.D  
Sample Name: lhw-13-185-chiral

=====  
Acq. Operator : 系统  
Sample Operator : 系统  
Acq. Instrument : SFC Location : Vial 63  
Injection Date : 1/22/2016 10:25:51 AM Inj Volume : 5.000 µl  
Acq. Method : C:\CHEM32\1\METHODS\DEF\_LC-TEST-2016.M  
Last changed : 1/22/2016 10:08:32 AM by 系统  
(modified after loading)  
Analysis Method : C:\CHEM32\1\METHODS\DEF\_LC-TEST-2016.M  
Last changed : 1/22/2016 11:09:57 AM by 系统  
(modified after loading)  
Additional Info : Peak(s) manually integrated

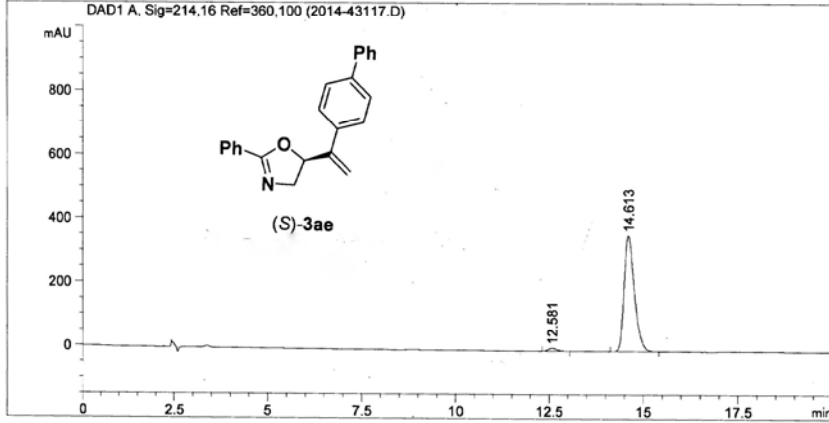

=====  
Area Percent Report  
=====

Sorted By : Signal  
Multiplier : 1.0000  
Dilution : 1.0000  
Do not use Multiplier & Dilution Factor with ISTDs

Signal 1: DAD1 A, Sig=214,16 Ref=360,100

| Peak # | RetTime [min] | Type | Width [min] | Area [mAU*s] | Height [mAU] | Area %  |
|--------|---------------|------|-------------|--------------|--------------|---------|
| 1      | 12.581        | BB   | 0.2056      | 153.15714    | 9.73401      | 2.2011  |
| 2      | 14.613        | BB   | 0.2866      | 6804.95557   | 363.14755    | 97.7989 |

Totals : 6958.11270 372.88156

=====  
\*\*\* End of Report \*\*\*

Data File C:\CHEM32\1\DATA\2014-43118.D  
Sample Name: lhw-13-185-rac-ad-h-7-3-1.3-214

=====  
Acq. Operator : 系统  
Sample Operator : 系统  
Acq. Instrument : SFC  
Injection Date : 1/22/2016 10:50:57 AM  
Location : Vial 62  
Inj Volume : 5.000 µl  
Acq. Method : C:\CHEM32\1\METHODS\DEF\_LC-TEST-2016.M  
Last changed : 1/22/2016 10:08:32 AM by 系统  
(modified after loading)  
Analysis Method : C:\CHEM32\1\METHODS\DEF\_LC-TEST-2016.M  
Last changed : 1/22/2016 11:10:36 AM by 系统  
(modified after loading)  
Additional Info : Peak(s) manually integrated

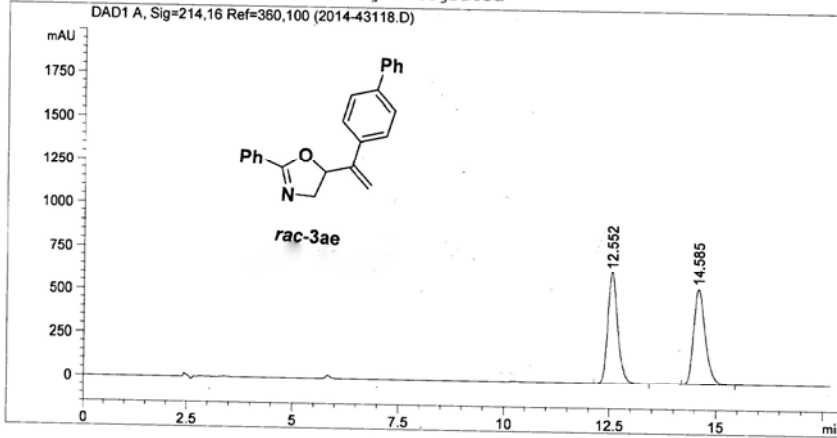

=====  
Area Percent Report  
=====

Sorted By : Signal  
Multiplier : 1.0000  
Dilution : 1.0000  
Do not use Multiplier & Dilution Factor with ISTDs

Signal 1: DAD1 A, Sig=214,16 Ref=360,100

| Peak # | RetTime [min] | Type | Width [min] | Area [mAU*s] | Height [mAU] | Area %  |
|--------|---------------|------|-------------|--------------|--------------|---------|
| 1      | 12.552        | BB   | 0.2416      | 1.02079e4    | 638.28204    | 49.9079 |
| 2      | 14.585        | VB   | 0.2872      | 1.02455e4    | 545.22955    | 50.0921 |

Totals : 2.04534e4 1183.51160

=====  
\*\*\* End of Report \*\*\*



lhw-13-183-C  
Jan 11 2016  
NA = 1000  
Solvent = cdcl3  
F1 = 100.527557 MHz  
F2 = 399.749146 MHz

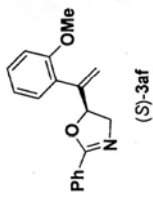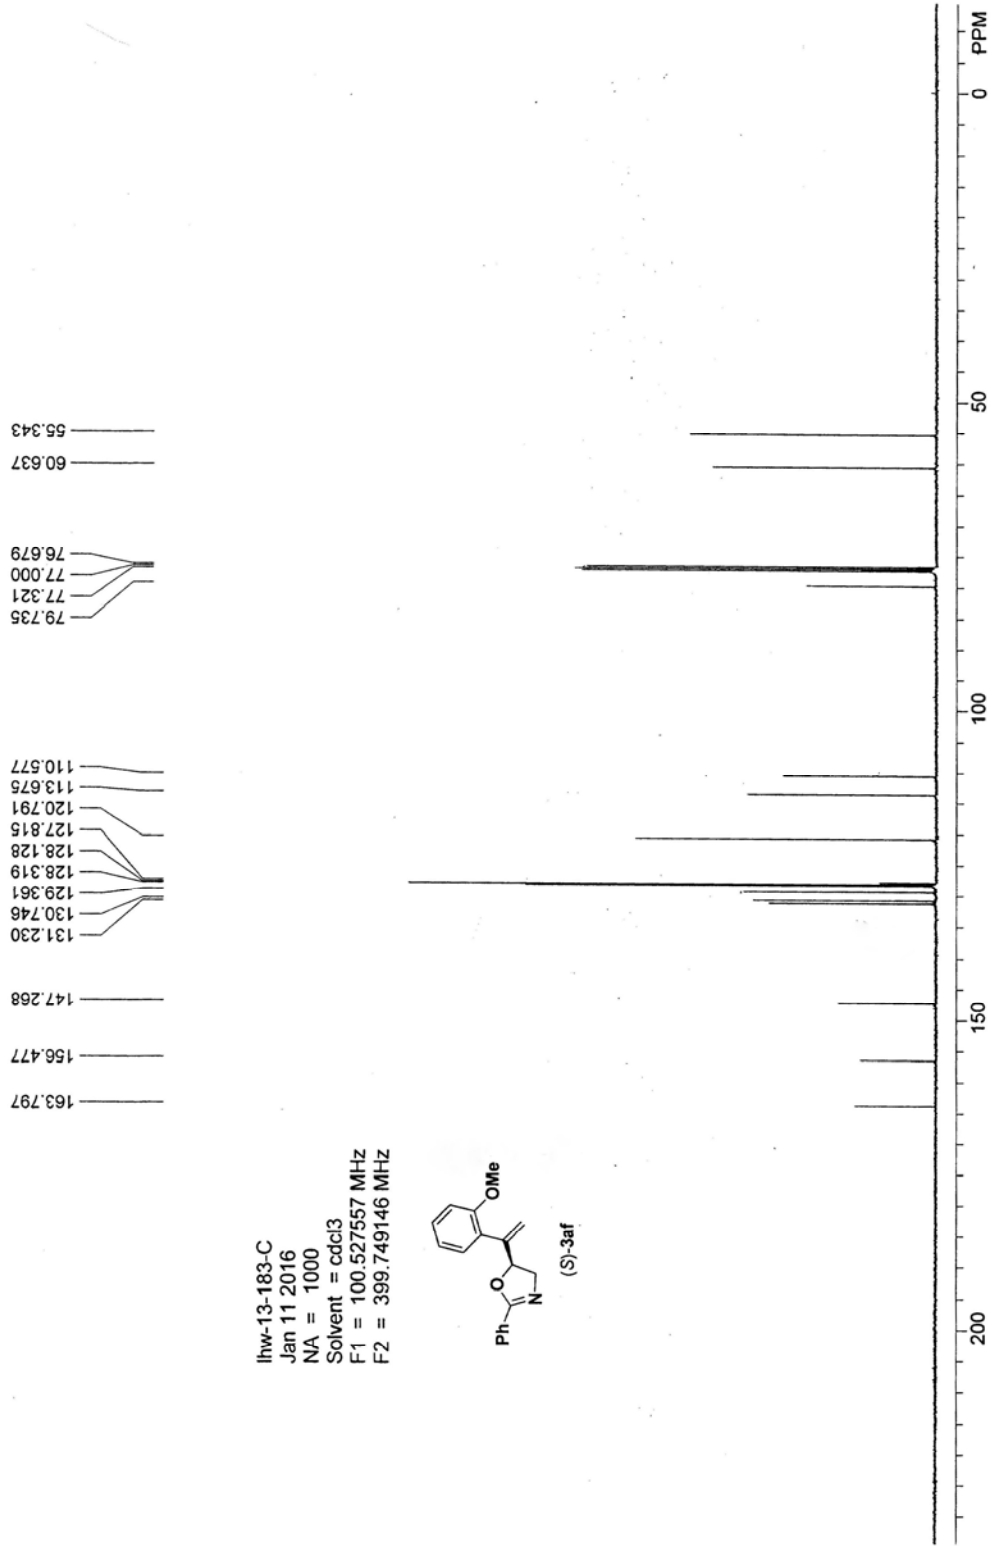

# lhw-13-183-as-h-80-20-0.5-214

实验时间: 2016-01-15, 13:47:38

报告时间: 2016-01-15, 17:21:21

谱图文件: d:\zhuguangjiong\lhw\20160115\lhw-13-183-as-h-80-20-0.5-214..org

实验内容简介:

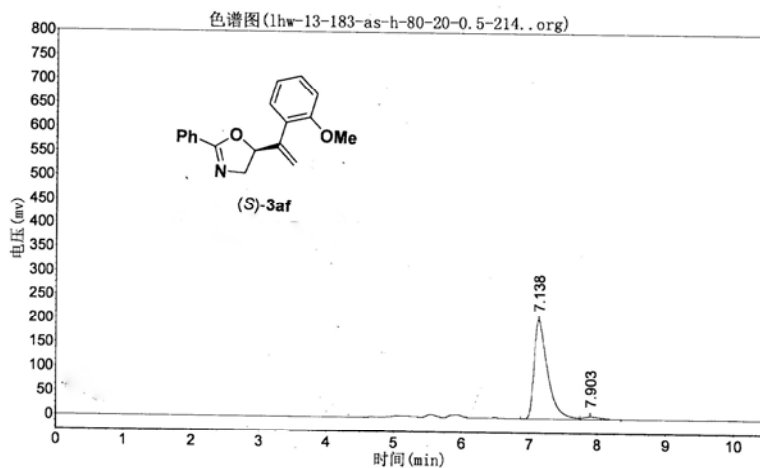

分析结果表

| 峰号 | 峰名 | 保留时间  | 峰高         | 峰面积         | 含量       |
|----|----|-------|------------|-------------|----------|
| 1  |    | 7.138 | 202947.281 | 2793675.500 | 96.9138  |
| 2  |    | 7.903 | 5159.826   | 88964.258   | 3.0862   |
| 总计 |    |       | 208107.107 | 2882639.758 | 100.0000 |

# zy-1-133-as-h-80-20-0.5-214

实验时间: 2016-01-15, 11:43:39

报告时间: 2016-01-15, 17:20:31

谱图文件: d:\zhuguangji\lhw\20160115\zy-1-133-as-h-80-20-0.5-214.org

实验内容简介:

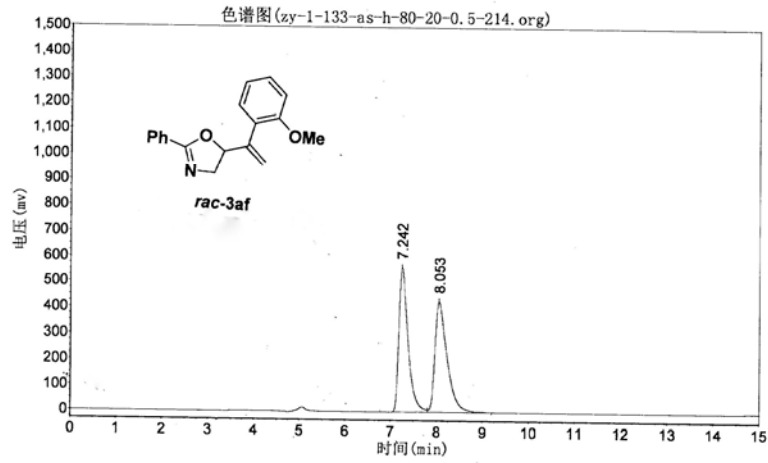

分析结果表

| 峰号 | 峰名 | 保留时间  | 峰高         | 峰面积          | 含量       |
|----|----|-------|------------|--------------|----------|
| 1  |    | 7.242 | 559842.000 | 7872663.500  | 49.5971  |
| 2  |    | 8.053 | 427990.281 | 8000561.500  | 50.4029  |
| 总计 |    |       | 987832.281 | 15873225.000 | 100.0000 |

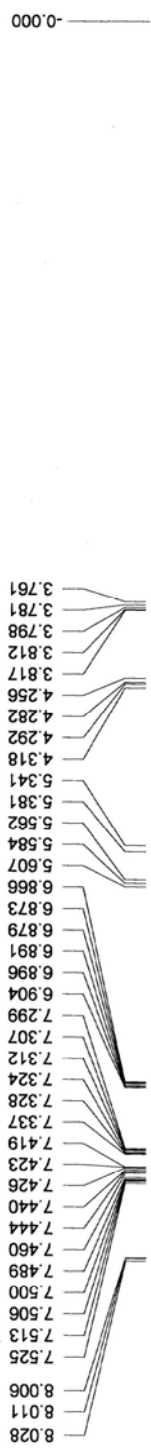

lhw-13-167-H  
 Dec 25 2015  
 NA = 4  
 Solvent = cdcl3  
 F1 = 399.749542 MHz  
 F2 = 100.526031 MHz

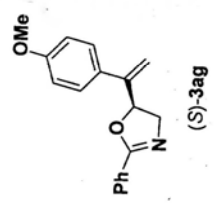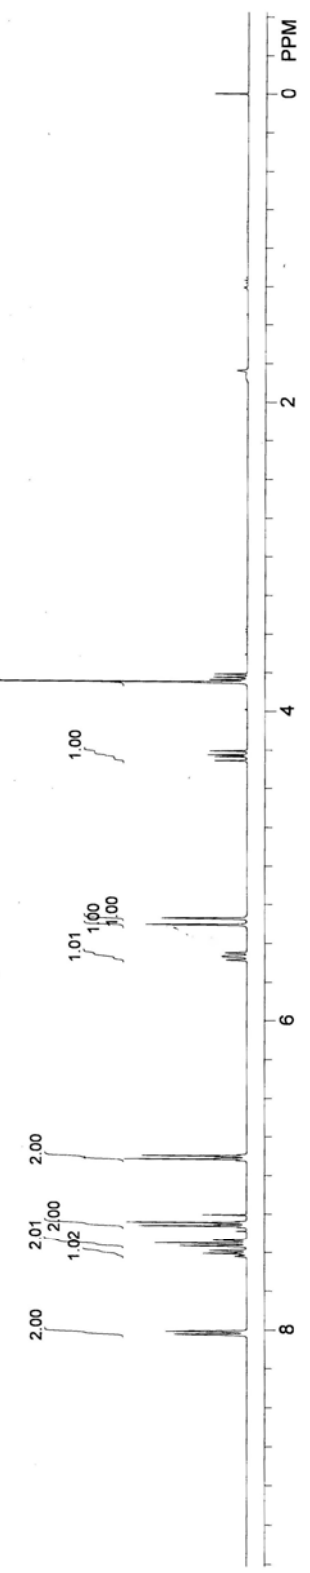



lhw-13-167-C  
Dec 25 2015  
NA = 2000  
Solvent = cdcl3  
F1 = 100.527557 MHz  
F2 = 399.749146 MHz

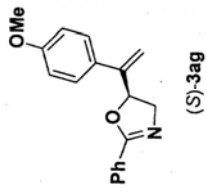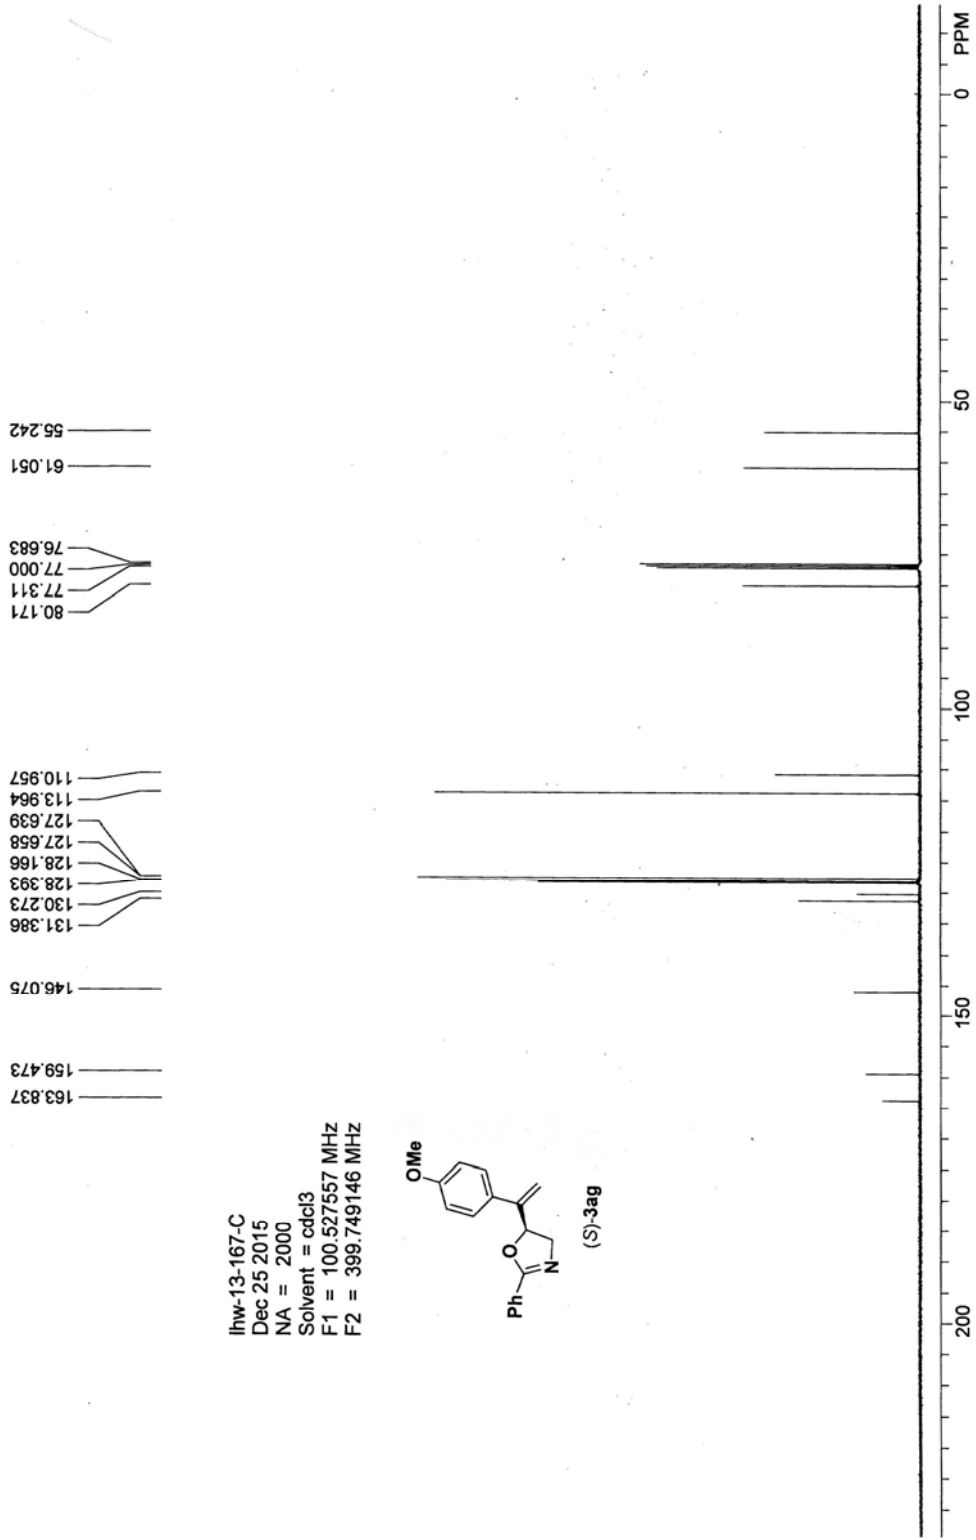

| SAMPLE INFORMATION |                               |                  |                       |
|--------------------|-------------------------------|------------------|-----------------------|
| Sample Name:       | lhw-13-167-as-h-80-20.0.5-214 | Acquired By:     | Breeze                |
| Sample Type:       | 未知                            | Date Acquired:   | 2016/1/7 14:58:40 CST |
| Val:               | 1                             | Acq. Method:     | zgj90                 |
| Injection #:       | 45                            | Date Processed:  | 2016/1/7 16:57:23 CST |
| Injection Volume:  | 25.00 $\mu$ l                 | Channel Name:    | V02489 ChA            |
| Run Time:          | 25.00 Minutes                 | Channel Desc.:   | V02489 ChA 214nm      |
| Column Type:       |                               | Sample Set Name: |                       |

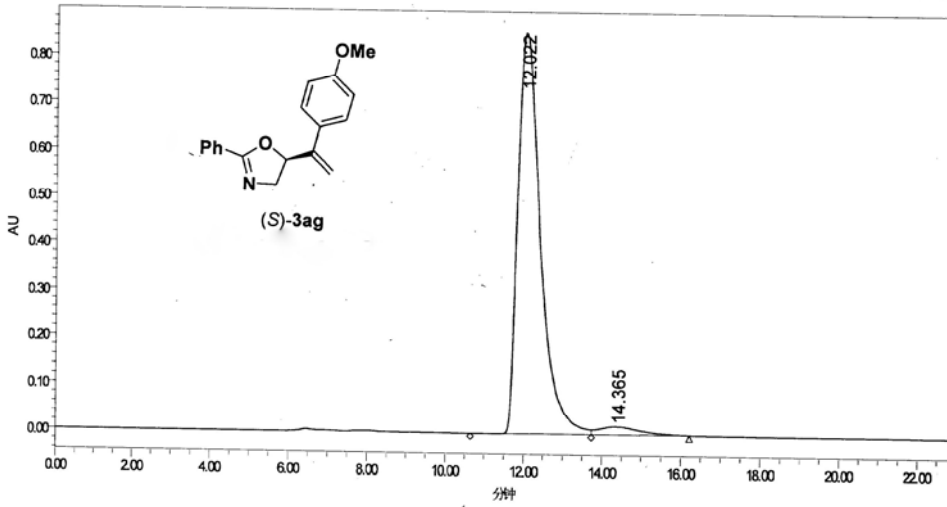

| RT (min) | Area (峰面积) | %Area | Height (峰高) | % Height |
|----------|------------|-------|-------------|----------|
| 1 12.022 | 34226610   | 96.42 | 856576      | 98.01    |
| 2 14.365 | 1271107    | 3.58  | 17356       | 1.99     |

中国科学院上海有机化学研究所

Project Name: defaults for copy  
Reported by User: Breeze user (Breeze)

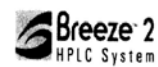

| SAMPLE INFORMATION |                           |                  |                       |
|--------------------|---------------------------|------------------|-----------------------|
| Sample Name:       | zy-1-134-as-h-80-200.5214 | Acquired By:     | Breeze                |
| Sample Type:       | 未知                        | Date Acquired:   | 2016/1/7 13:36:10 CST |
| Val:               | 1                         | Acq. Method:     | zgj90                 |
| Injection #:       | 44                        | Date Processed:  | 2016/1/7 16:55:44 CST |
| Injection Volume:  | 25.00 u                   | Channel Name:    | V2489 ChA             |
| Run Time:          | 25.00 Minutes             | Channel Desc.:   | V2489 ChA214nm        |
| Column Type:       |                           | Sample Set Name: |                       |

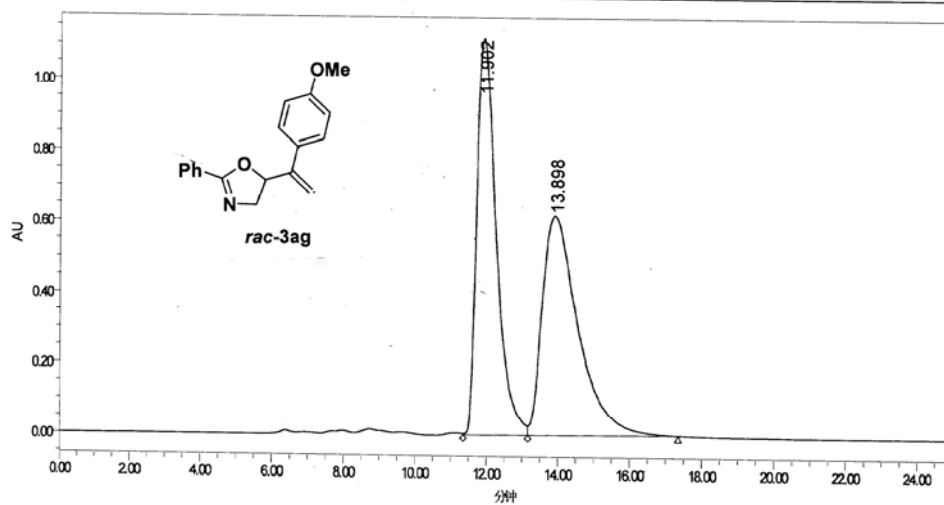

| RT (min) | Area (峰面积) | %Area | Height (峰高) | % Height |
|----------|------------|-------|-------------|----------|
| 11.902   | 42577019   | 49.61 | 1117140     | 64.37    |
| 13.898   | 43054408   | 50.39 | 618467      | 35.63    |



lhv-13-166-C  
Dec 29 2015  
NA = 1000  
Solvent = cdcl3  
F1 = 100.527557 MHz  
F2 = 399.749146 MHz

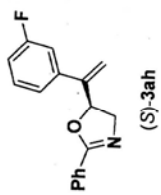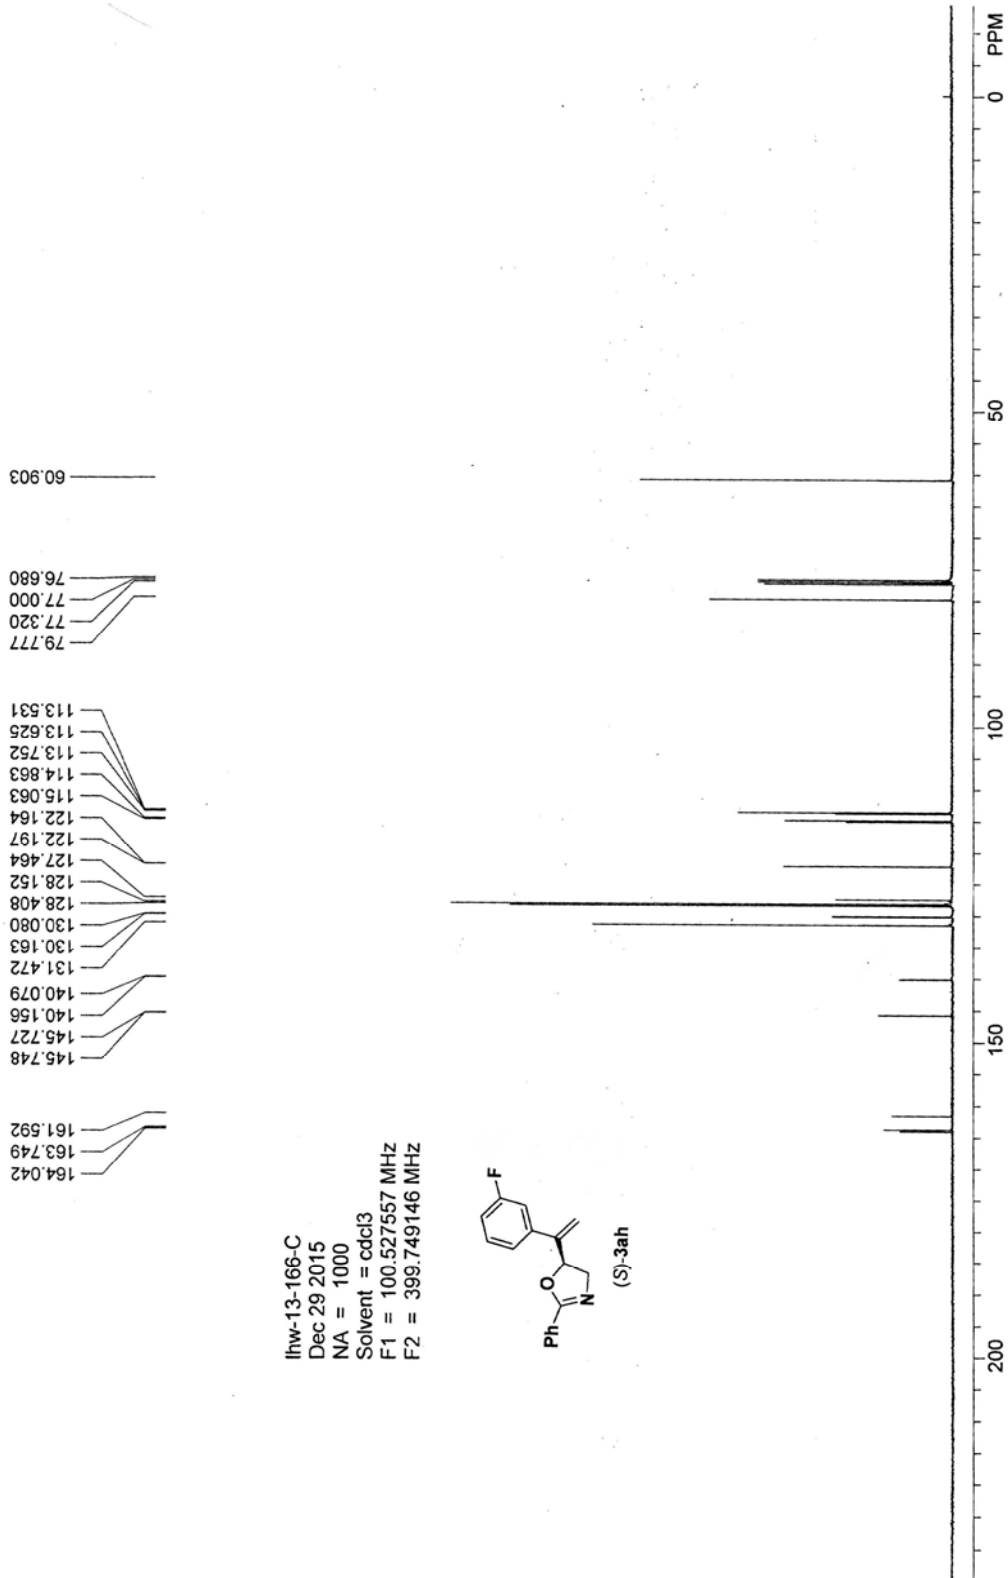

lhv-13-166-F  
Jul 22 2016  
NA = 256  
Solvent = cdcl3  
F1 = 376.119049 MHz  
F2 = 100.526031 MHz

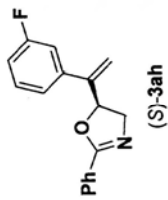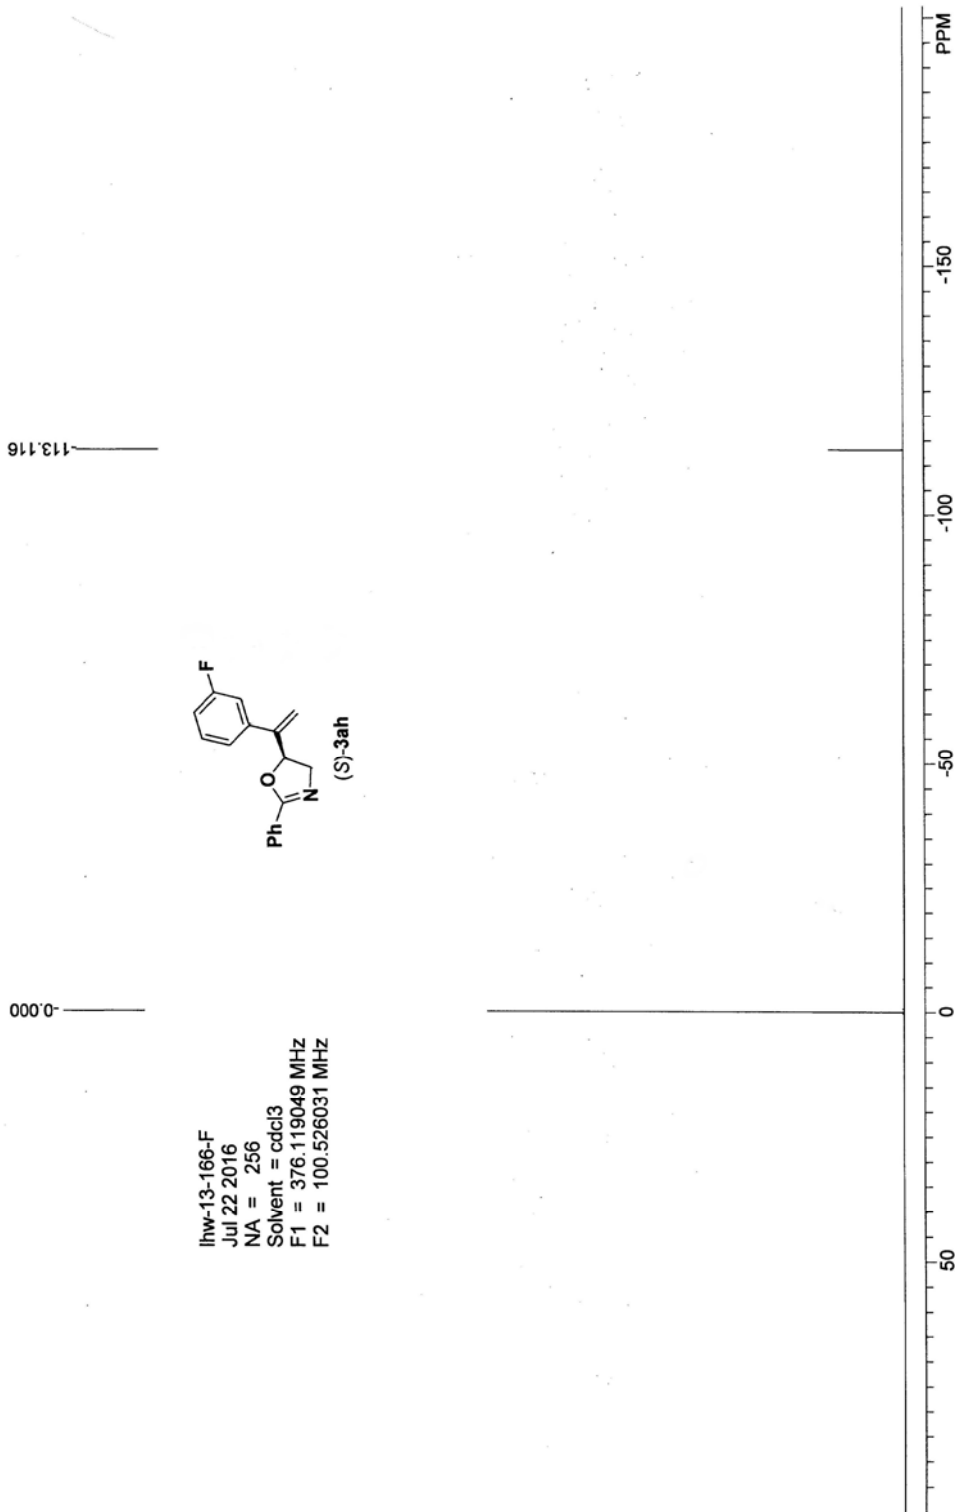

中国科学院上海有机化学研究所  
 Project Name: defaults for copy  
 Reported by User: Breeze user (Breeze)

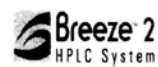

| SAMPLE INFORMATION |                            |                  |                        |
|--------------------|----------------------------|------------------|------------------------|
| Sample Name:       | llw-13-166-oz-h90-10-1-214 | Acquired By:     | Breeze                 |
| Sample Type:       | 未知                         | Date Acquired:   | 2016/1/14 15:16:27 CST |
| Vial:              | 1                          | Acq. Method:     | zig90                  |
| Injection #:       | 28                         | Date Processed:  | 2016/1/14 17:36:50 CST |
| Injection Volume:  | 25.00 $\mu$ l              | Channel Name:    | WD489 ChA              |
| Run Time:          | 20.00 Minutes              | Channel Desc.:   | WD489 ChA.214mm        |
| Column Type:       |                            | Sample Set Name: |                        |

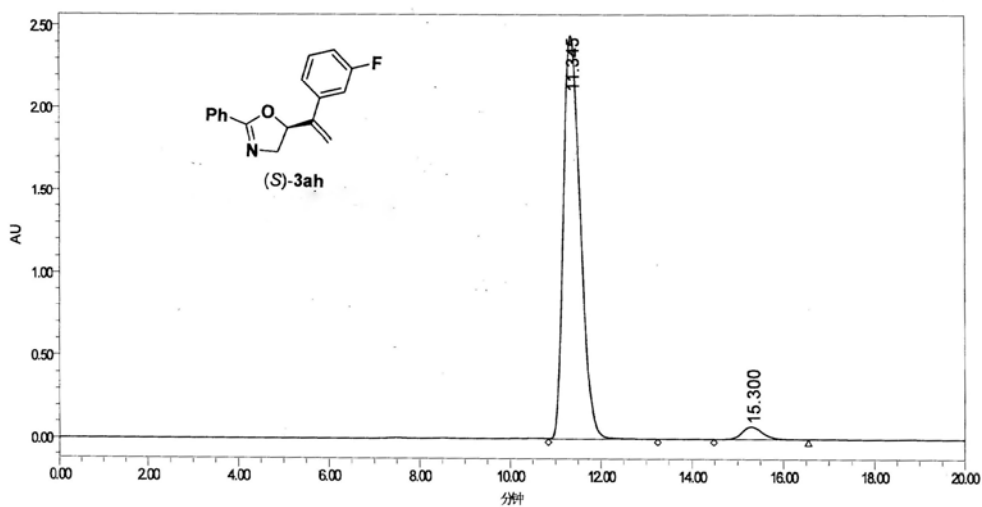

|   | RT (min) | Area (峰面积) | %Area | Height (峰高) | % Height |
|---|----------|------------|-------|-------------|----------|
| 1 | 11.346   | 63730773   | 96.31 | 2442733     | 96.96    |
| 2 | 15.300   | 2443630    | 3.69  | 76136       | 3.02     |

**SAMPLE INFORMATION**

|                   |                      |                  |                        |
|-------------------|----------------------|------------------|------------------------|
| Sample Name:      | lhw34az-h90-10-1-214 | Acquired By:     | Breeze                 |
| Sample Type:      | 未知                   | Date Acquired:   | 2016/1/14 14:32:39 CST |
| Vial:             | 1                    | Acq. Method:     | zgj90                  |
| Injection #:      | 26                   | Date Processed:  | 2016/1/14 17:35:22 CST |
| Injection Volume: | 25.00 ul             | Channel Name:    | V2489 ChA              |
| Run Time:         | 25.00 Minutes        | Channel Desc.:   | V2489 ChA.214nm        |
| Column Type:      |                      | Sample Set Name: |                        |

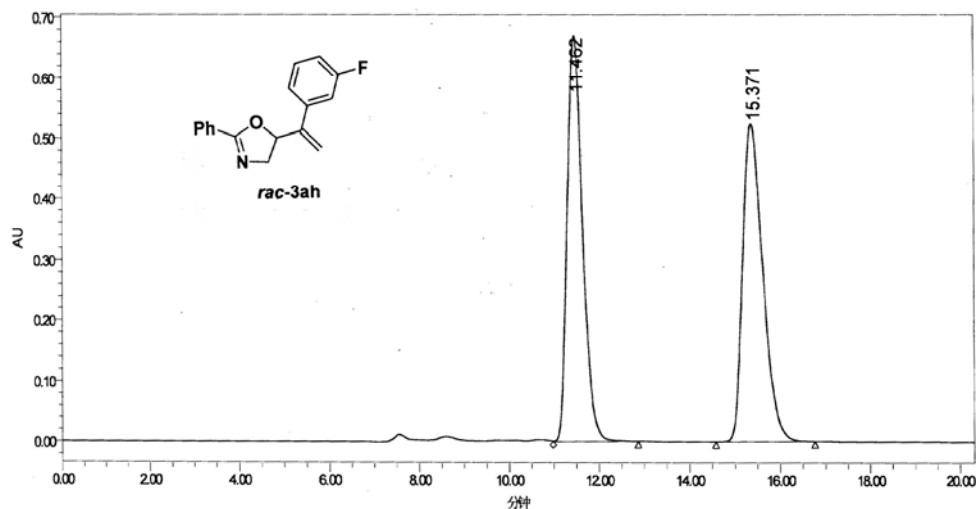

|   | RT (min) | Area (峰面积) | %Area | Height (峰高) | % Height |
|---|----------|------------|-------|-------------|----------|
| 1 | 11.462   | 15970742   | 49.72 | 669957      | 55.15    |
| 2 | 15.371   | 16149068   | 50.28 | 523107      | 43.85    |



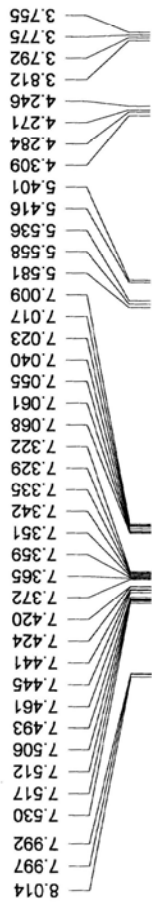

lhw-13-159-H  
Jan 18 2016  
NA = 4  
Solvent = cdcl3  
F1 = 399.749542 MHz  
F2 = 100.526031 MHz

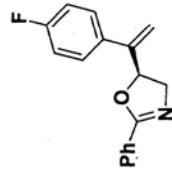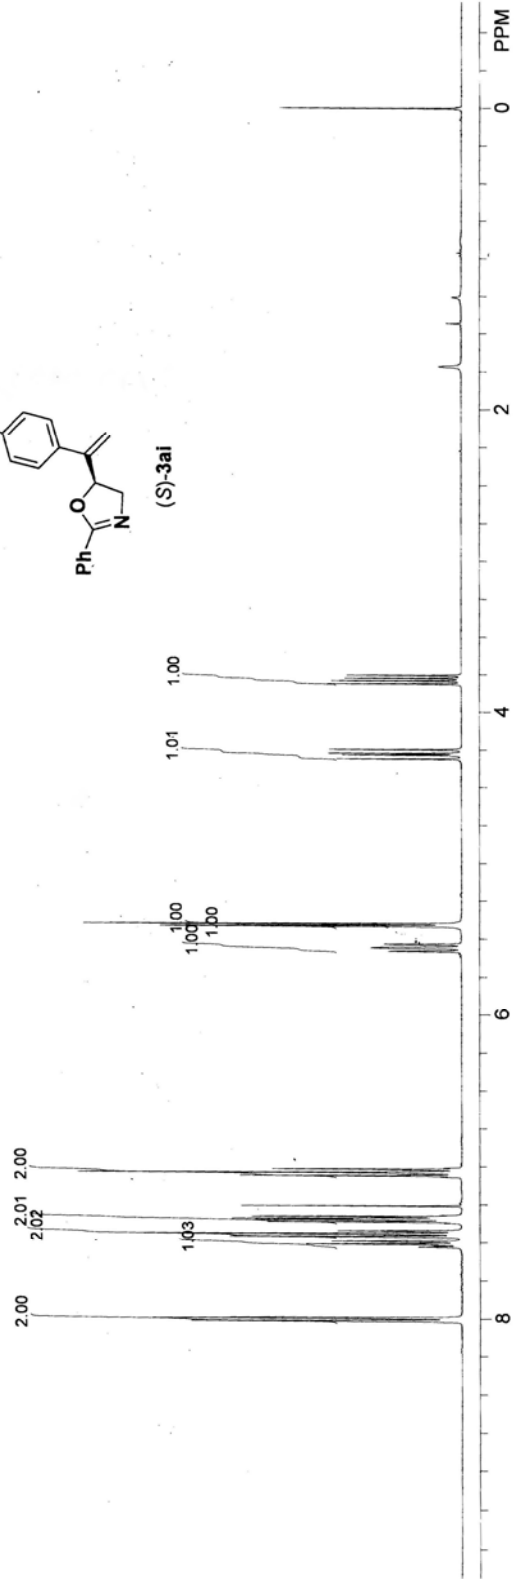

lhv-13-159-C  
Jan 18 2016  
NA = 2000  
Solvent = cdcl3  
F1 = 100.527557 MHz  
F2 = 399.749146 MHz

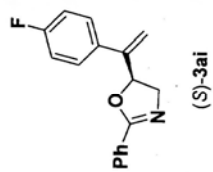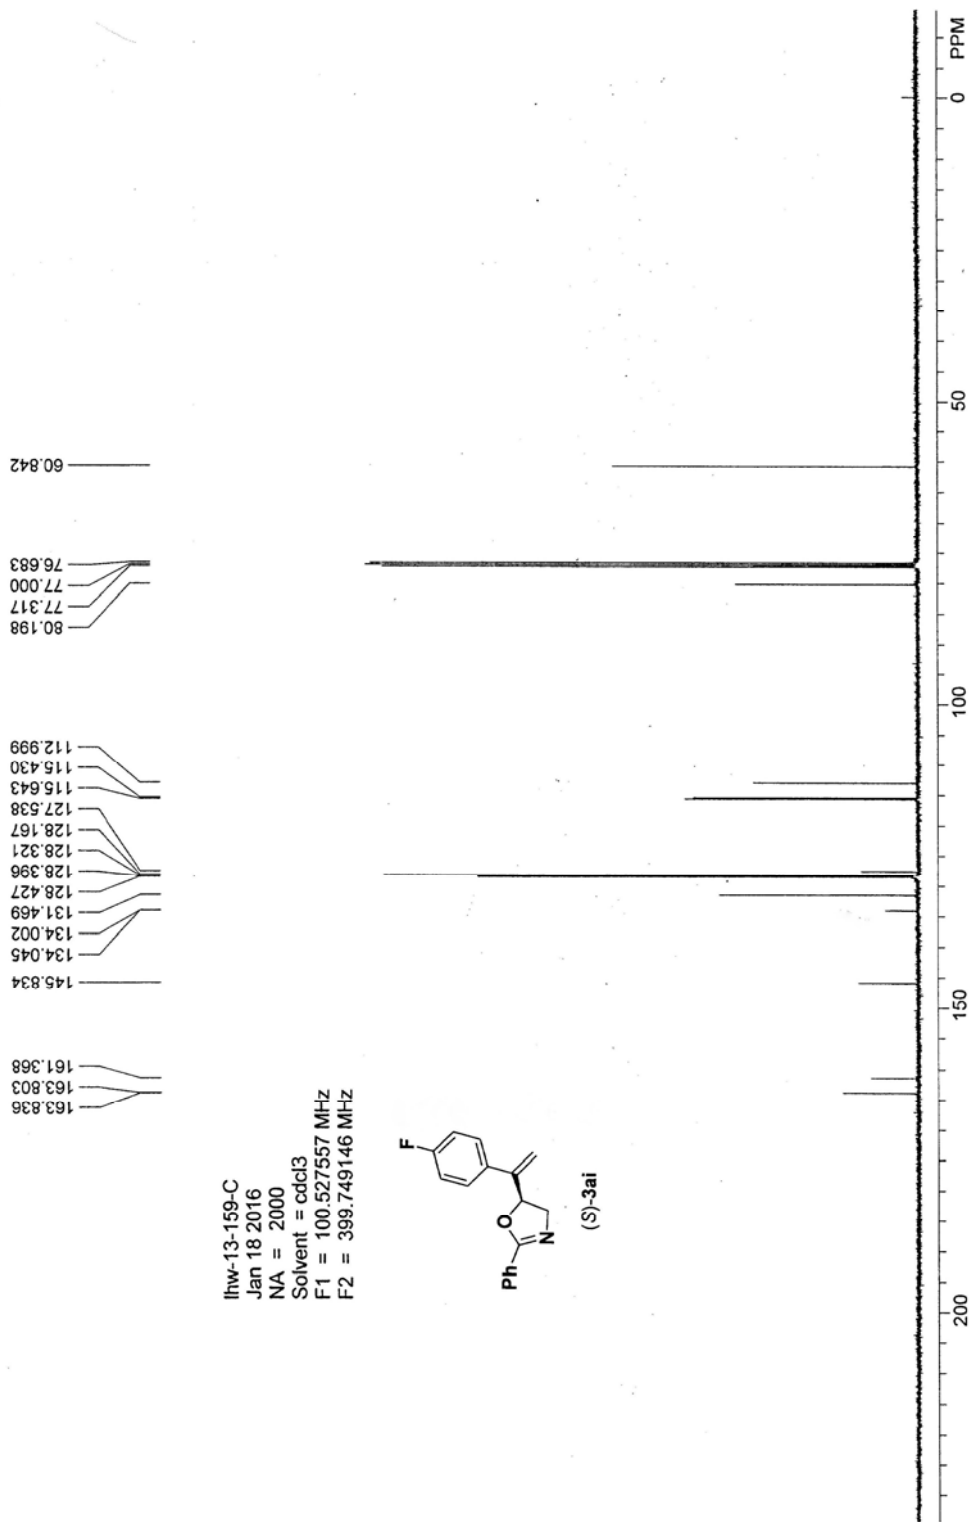

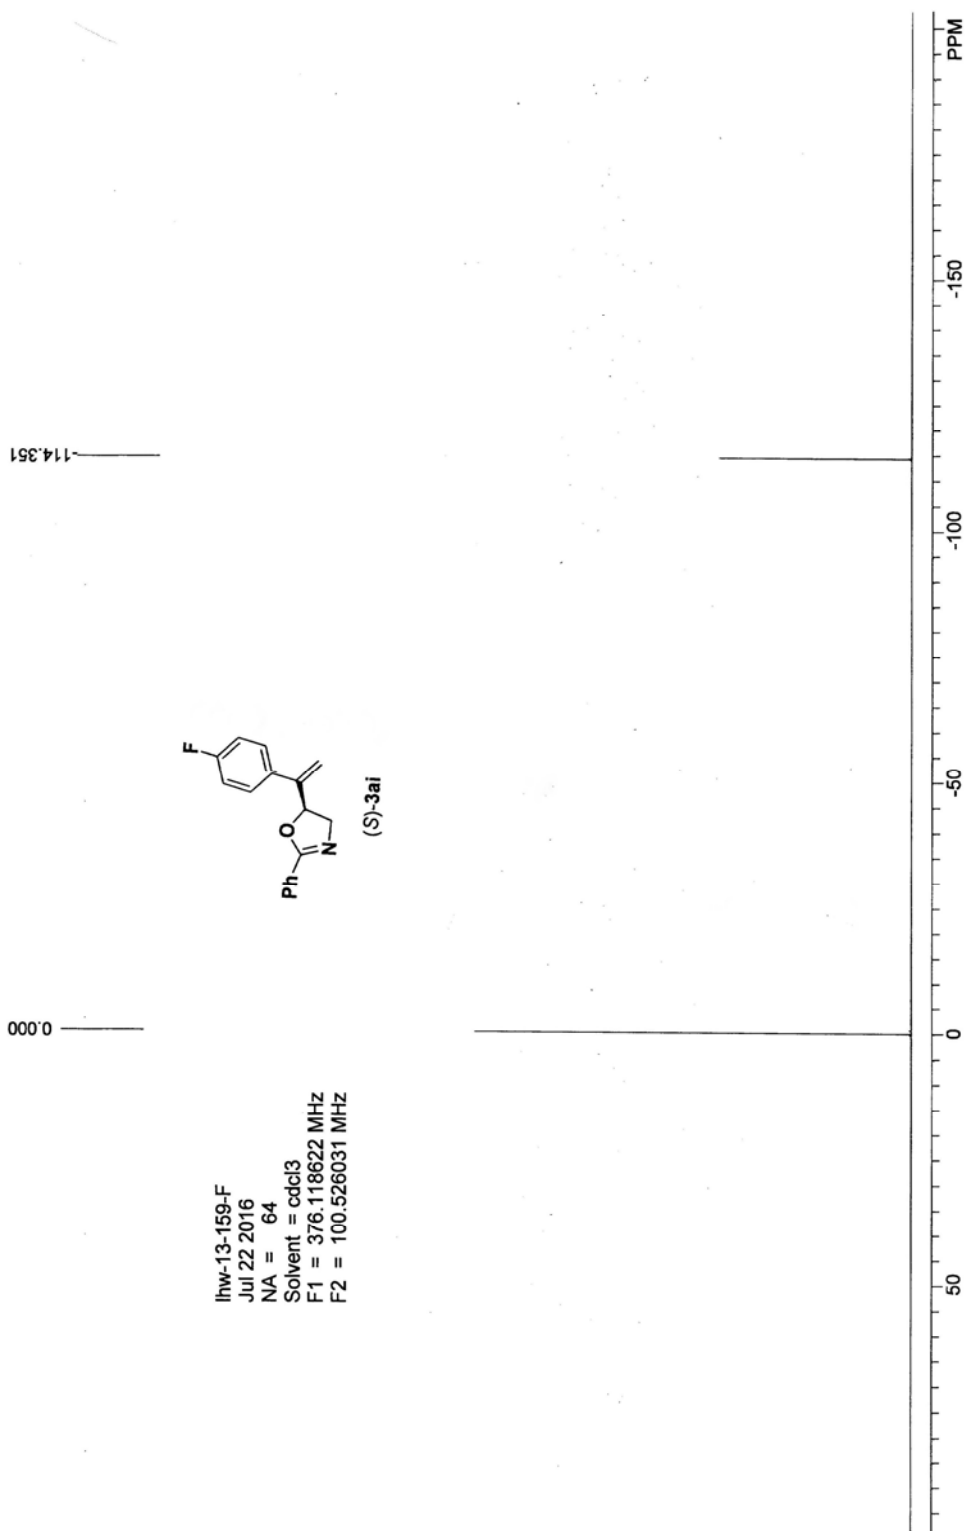

**SAMPLE INFORMATION**

|                   |                            |                  |                         |
|-------------------|----------------------------|------------------|-------------------------|
| Sample Name:      | lhw-13-159-az-h-95-5-1-214 | Acquired By:     | Breeze                  |
| Sample Type:      | 未知                         | Date Acquired:   | 2015/12/24 12:35:03 CST |
| Vial:             | 1                          | Acq. Method:     | zgj95                   |
| Injection #:      | 43                         | Date Processed:  | 2015/12/24 17:08:18 CST |
| Injection Volume: | 25.00 $\mu$ l              | Channel Name:    | V2489 ChA               |
| Run Time:         | 30.00 Minutes              | Channel Desc:    | V2489 ChA.230nm         |
| Column Type:      |                            | Sample Set Name: |                         |

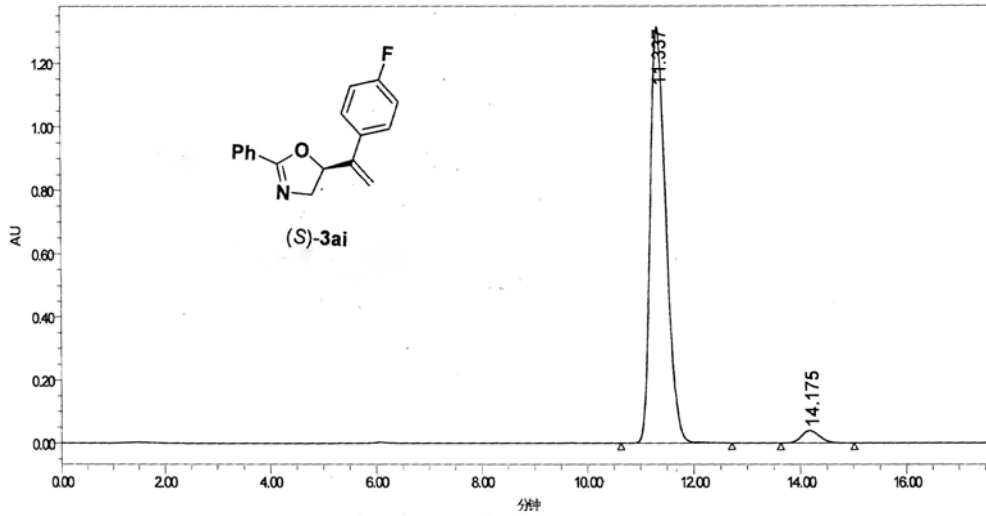

|   | RT (min) | Area (峰面积) | %Area | Hight (峰高) | % Hight |
|---|----------|------------|-------|------------|---------|
| 1 | 11.337   | 27047818   | 96.62 | 1314027    | 97.08   |
| 2 | 14.175   | 947170     | 3.36  | 38514      | 2.92    |

中国科学院上海有机化学研究所  
 Project Name: defaults for copy  
 Reported by User: Breeze user (Breeze)

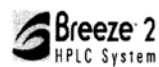

| SAMPLE INFORMATION |                         |                  |                         |
|--------------------|-------------------------|------------------|-------------------------|
| Sample Name:       | zy-1-111-az-h95-5-1-214 | Acquired By:     | Breeze                  |
| Sample Type:       | 未知                      | Date Acquired:   | 2015/12/24 11:46:32 CST |
| Val:               | 1                       | Acq. Method:     | zg95                    |
| Injection #:       | 41                      | Date Processed:  | 2015/12/24 17:08:01 CST |
| Injection Volume:  | 25.00 µl                | Channel Name:    | V2489 ChA               |
| Run Time:          | 30.00 Minutes           | Channel Desc.:   | V2489 ChA.230mm         |
| Column Type:       |                         | Sample Set Name: |                         |

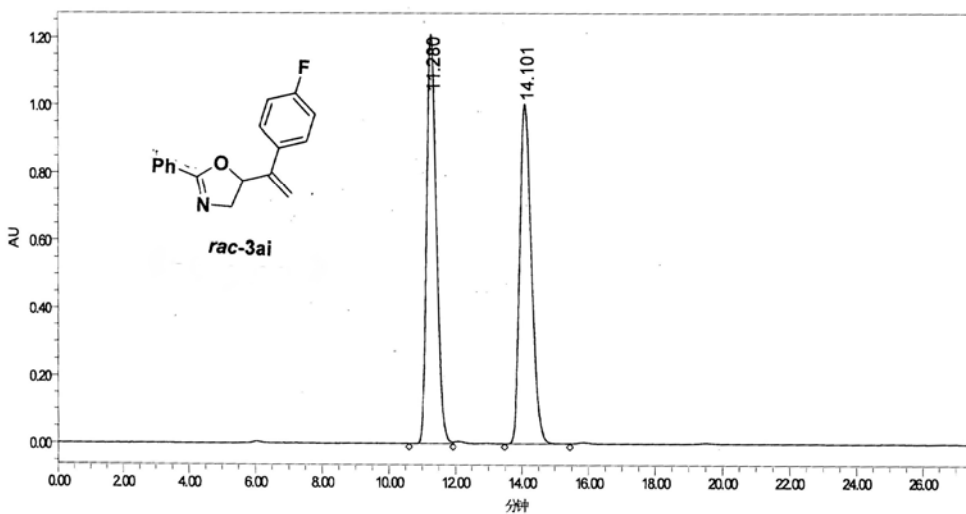

|   | RT (min) | Area (峰面积) | %Area | Height (峰高) | % Height |
|---|----------|------------|-------|-------------|----------|
| 1 | 11.280   | 24408264   | 49.93 | 1210171     | 54.68    |
| 2 | 14.101   | 24480266   | 50.07 | 1003216     | 45.32    |

8.020  
8.015  
8.012  
8.007  
7.999  
7.994  
7.990  
7.986  
7.994  
7.999  
7.994  
7.990  
7.986  
7.536  
7.532  
7.530  
7.521  
7.514  
7.508  
7.499  
7.496  
7.492  
7.463  
7.459  
7.447  
7.443  
7.430  
7.426  
7.423  
7.340  
7.338  
7.333  
7.326  
7.318  
7.314  
7.306  
7.300  
7.293  
7.291  
5.583  
5.563  
5.560  
5.557  
5.537  
5.444  
4.316  
4.289  
4.279  
4.253  
3.805  
3.786  
3.768  
0.000

lhw-13-160-H  
Dec 21 2015  
NA = 4  
Solvent = cdcl3  
F1 = 399.749542 MHz  
F2 = 100.526031 MHz

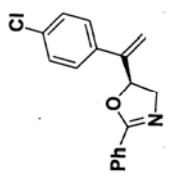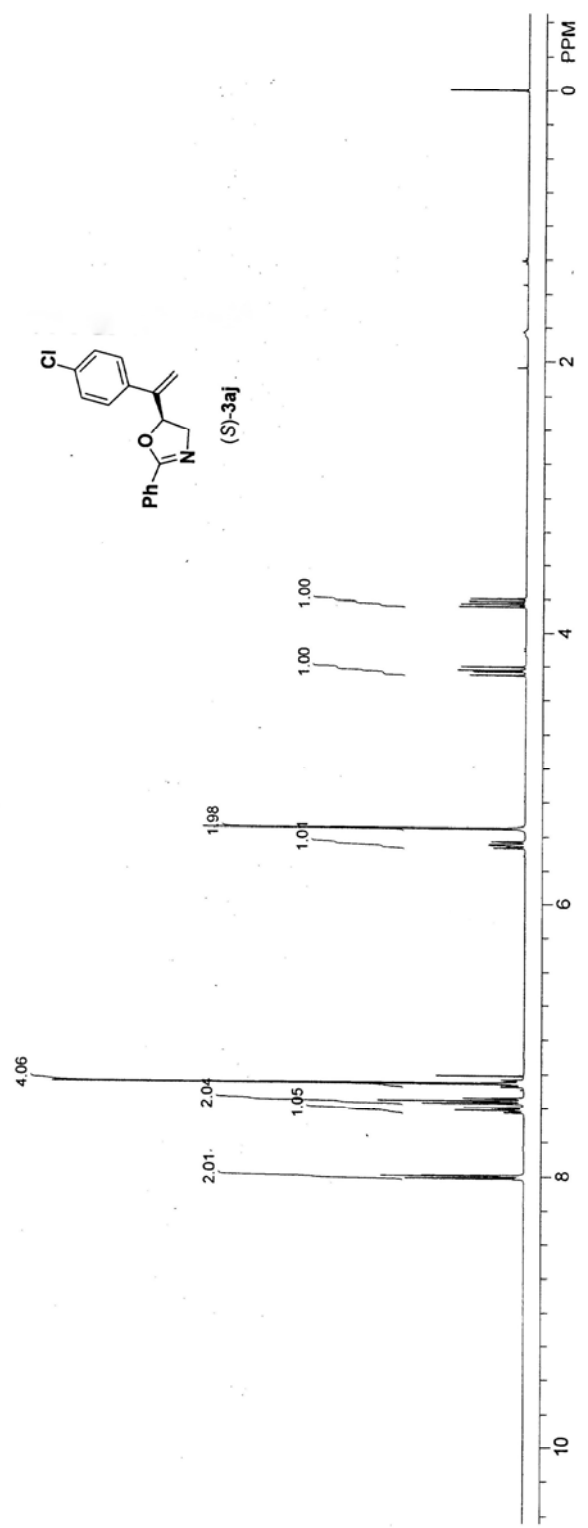

lnw-13-160-C  
Dec 21 2015  
NA = 256  
Solvent = cdcl3  
F1 = 100.527557 MHz  
F2 = 399.749146 MHz

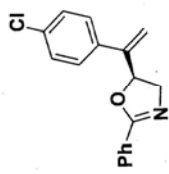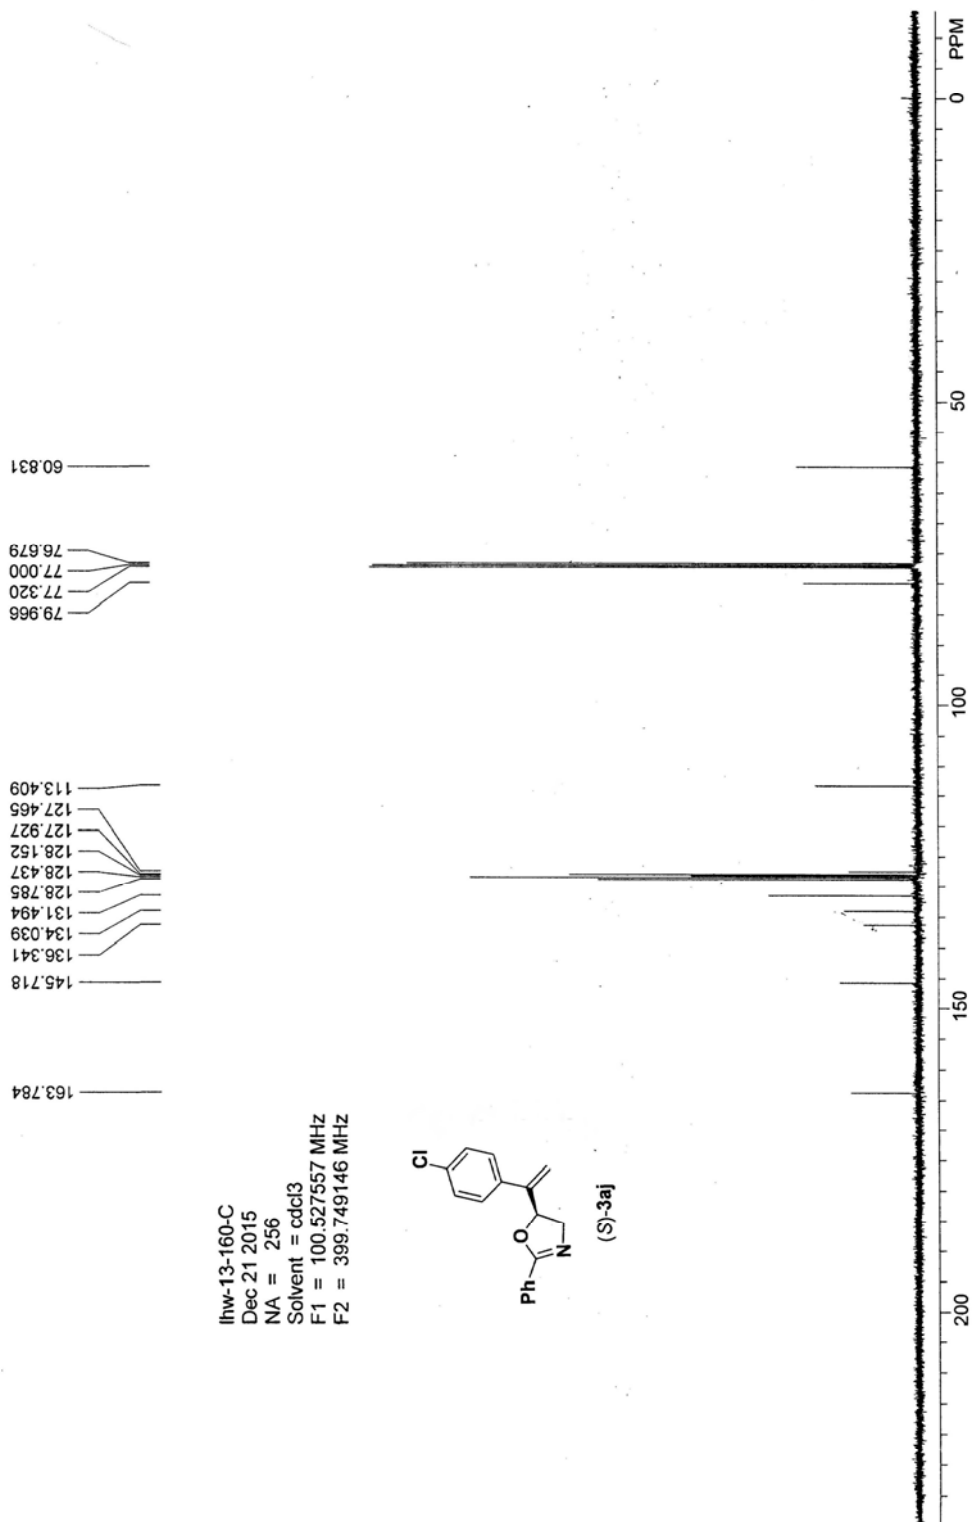

**SAMPLE INFORMATION**

|                  |                             |                 |                         |
|------------------|-----------------------------|-----------------|-------------------------|
| Sample Name      | lhw-13-160-az-h-90-10-1-214 | Acquired By     | Breeze                  |
| Sample Type      | 未知                          | Date Acquired   | 2015/12/24 14:04:05 CST |
| Val:             | 1                           | Acq. Method     | zg95                    |
| Injection#       | 46                          | Date Processed  | 2015/12/24 17:07:38 CST |
| Injection Volume | 25.00 $\mu$ l               | Channel Name    | V2489 ChA               |
| Run Time         | 60.00 Minutes               | Channel Desc.:  | V2489 ChA.230m          |
| Column Type      |                             | Sample Set Name |                         |

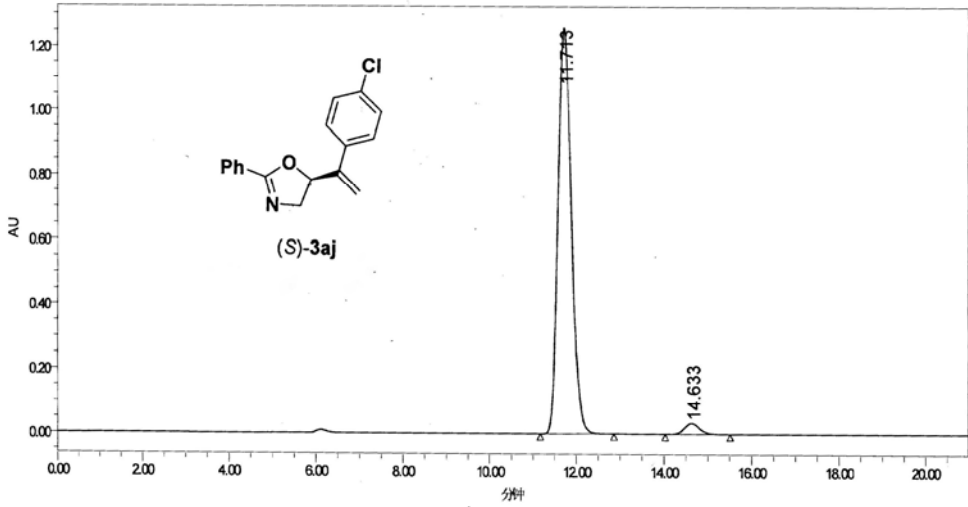

| RT (min) | Area (AU*sec) | %Area | Height (AU) | % Height |
|----------|---------------|-------|-------------|----------|
| 11.713   | 27002548      | 96.97 | 1260314     | 97.34    |
| 14.633   | 844096        | 3.03  | 34407       | 2.66     |



**SAMPLE INFORMATION**

|                   |                           |                  |                         |
|-------------------|---------------------------|------------------|-------------------------|
| Sample Name:      | zy-1-115-oz-h-90-10-1-214 | Acquired By:     | Breeze                  |
| Sample Type:      | 未知                        | Date Acquired:   | 2015/12/24 13:24:39 CST |
| Vial:             | 1                         | Acq. Method:     | zgj95                   |
| Injection#:       | 45                        | Date Processed:  | 2015/12/24 17:07:20 CST |
| Injection Volume: | 25.00 uL                  | Channel Name:    | V02489 ChA              |
| Run Time:         | 60.00 Minutes             | Channel Desc.:   | V02489 ChA.230nm        |
| Column Type:      |                           | Sample Set Name: |                         |

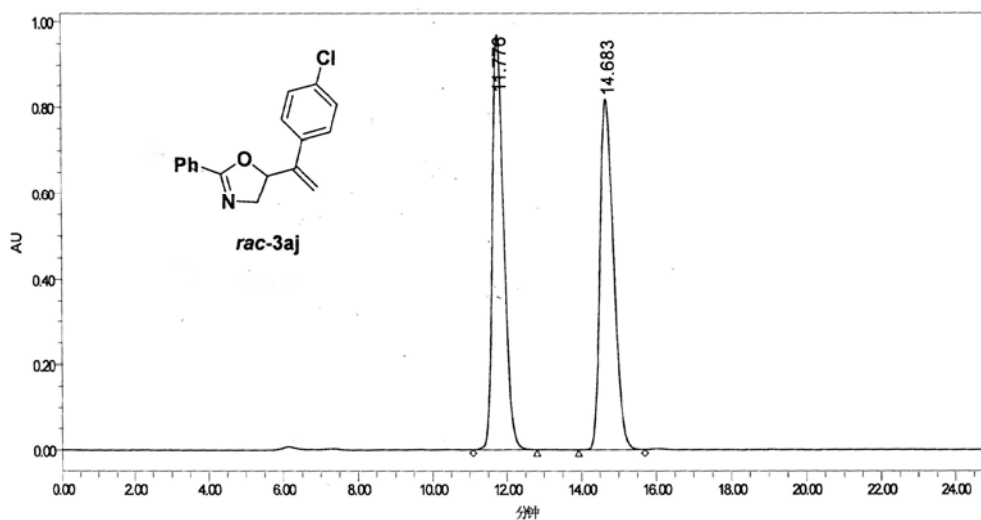

|   | RT (min) | Area (峰面积) | %Area | Height (峰高) | % Height |
|---|----------|------------|-------|-------------|----------|
| 1 | 11.776   | 20682381   | 50.20 | 970446      | 54.27    |
| 2 | 14.683   | 20514516   | 49.80 | 817599      | 45.73    |

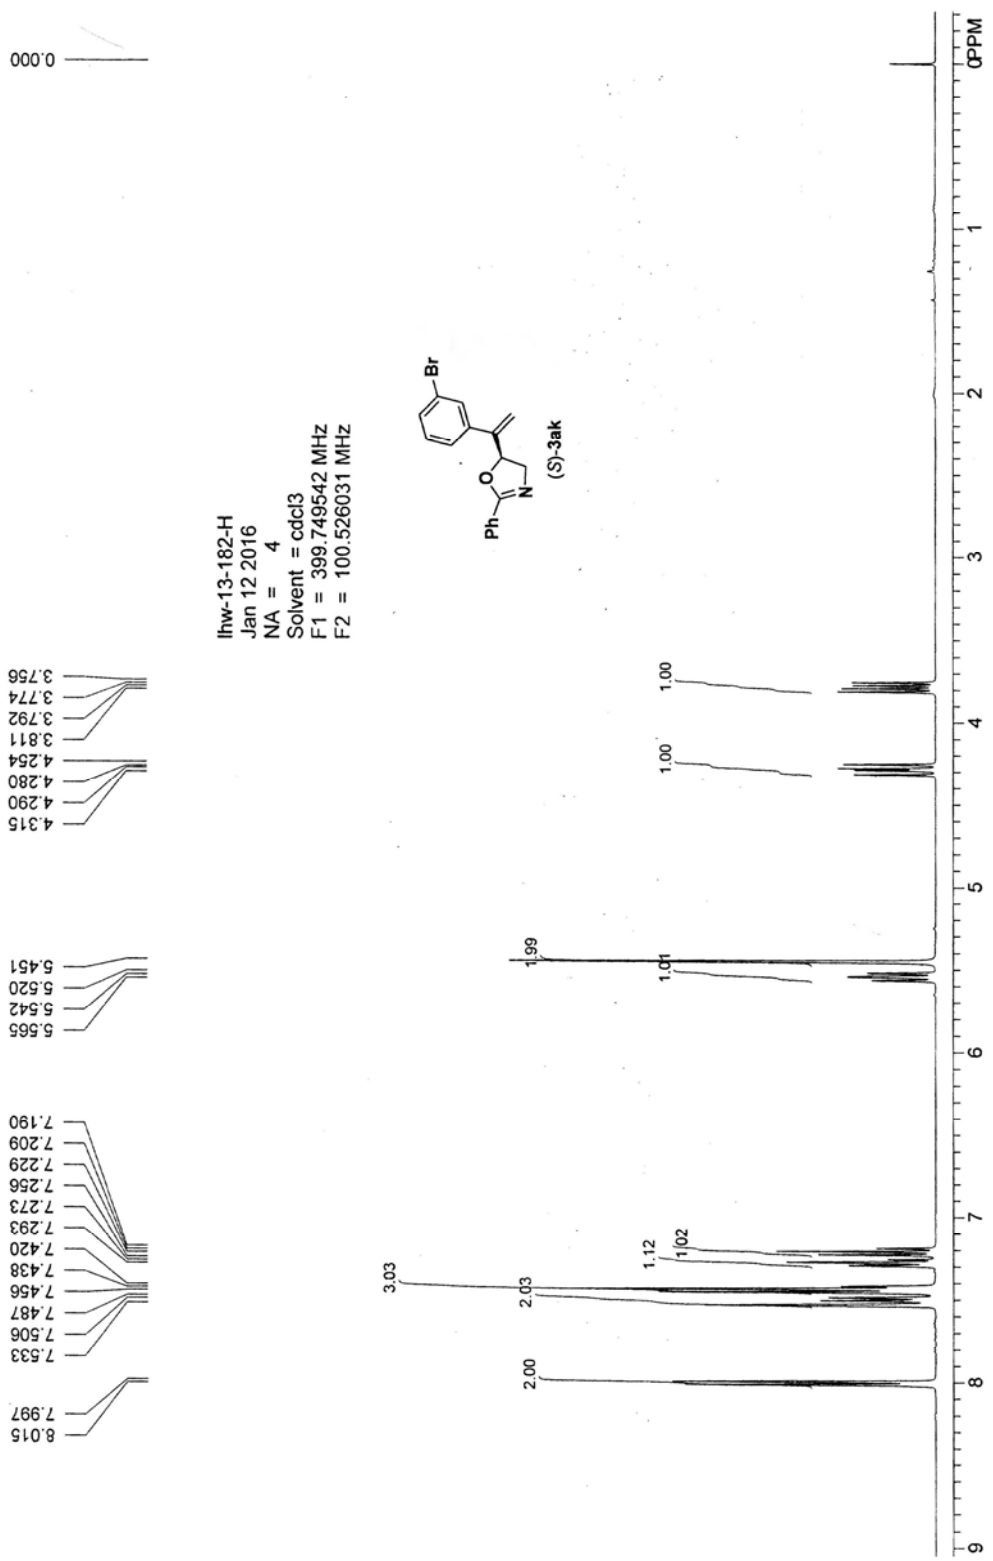

Inw-13-182-C  
Jan 12 2016  
NA = 1000  
Solvent = cdcl3  
F1 = 100.527557 MHz  
F2 = 399.749146 MHz

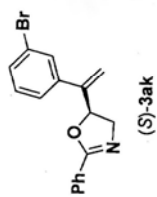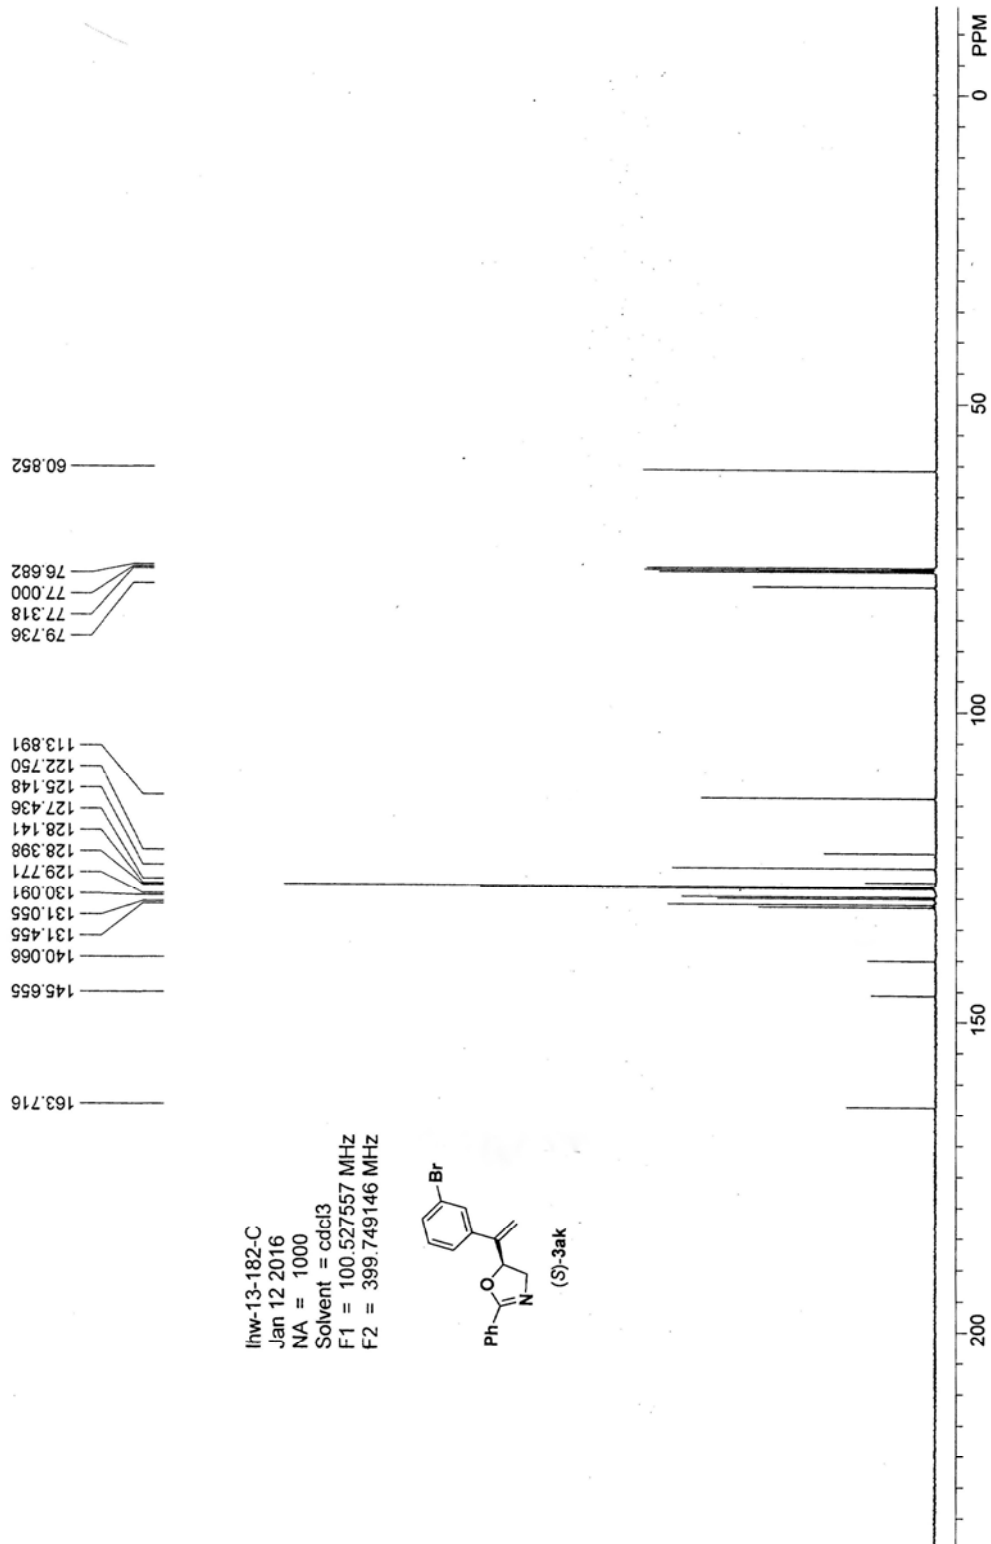

中国科学院上海有机化学研究所  
 Project Name: defaults for copy  
 Reported by User: Breeze user (Breeze)

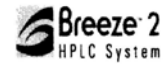

SAMPLE INFORMATION

|                   |                            |                  |                        |
|-------------------|----------------------------|------------------|------------------------|
| Sample Name:      | lhw-13-182-oz-h80-10-1-214 | Acquired By:     | Breeze                 |
| Sample Type:      | 未知                         | Date Acquired:   | 2016/1/14 17:13:04 CST |
| Vial:             | 1                          | Acq. Method:     | zg90                   |
| Injection #:      | 33                         | Date Processed:  | 2016/1/14 17:36:45 CST |
| Injection Volume: | 25.00 u                    | Channel Name:    | W2489 ChA              |
| Run Time:         | 20.00 Minutes              | Channel Desc.:   | W2489 ChA.214nm        |
| Column Type:      |                            | Sample Set Name: |                        |

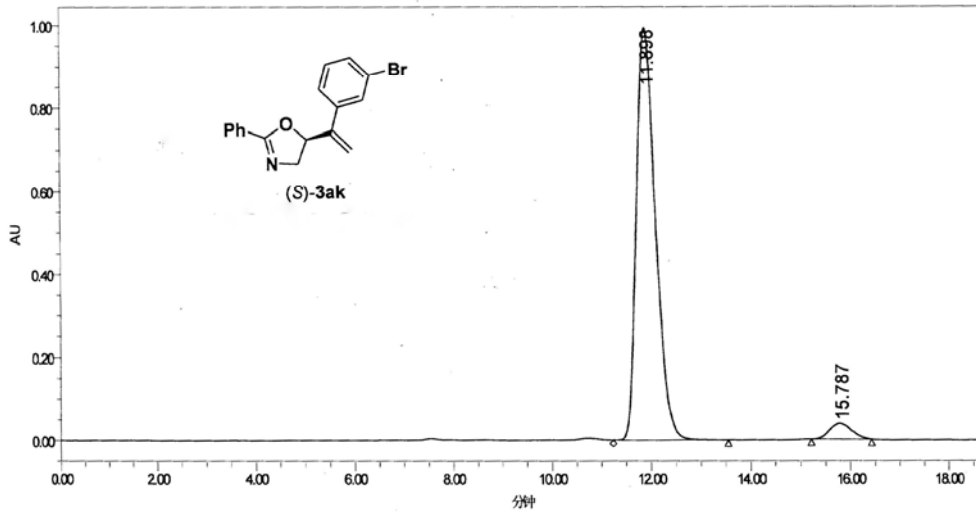

|   | RT (min) | Area (µsec) | %Area | Height (µ) | % Height |
|---|----------|-------------|-------|------------|----------|
| 1 | 11.896   | 26462066    | 95.67 | 992694     | 95.28    |
| 2 | 15.787   | 1197488     | 4.33  | 38327      | 3.72     |

中国科学院上海有机化学研究所  
 Project Name: defaults for copy  
 Reported by User: Breeze user (Breeze)

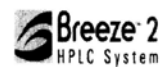

| SAMPLE INFORMATION |                           |                  |                        |
|--------------------|---------------------------|------------------|------------------------|
| Sample Name:       | zy-1-123-az-h-90-10-1-214 | Acquired By:     | Breeze                 |
| Sample Type:       | 未知                        | Date Acquired:   | 2016/1/14 17:53:03 CST |
| Vial:              | 1                         | Acq. Method:     | zgj90                  |
| Injection #:       | 35                        | Date Processed:  | 2016/1/14 18:10:31 CST |
| Injection Volume:  | 25.00 $\mu$ l             | Channel Name:    | V2489 ChA              |
| Run Time:          | 20.00 Minutes             | Channel Desc.:   | V2489 ChA.214mm        |
| Column Type:       |                           | Sample Set Name: |                        |

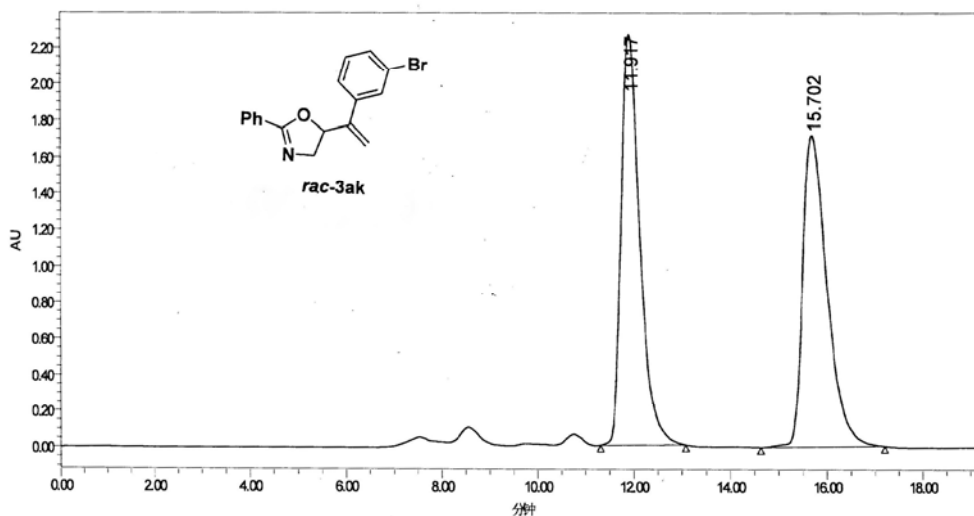

|   | RT<br>(min) | Area<br>( $\mu$ sec) | %Area | Height<br>( $\mu$ ) | %<br>Height |
|---|-------------|----------------------|-------|---------------------|-------------|
| 1 | 11.917      | 61026939             | 50.36 | 2259922             | 56.84       |
| 2 | 15.702      | 60150838             | 49.64 | 1715760             | 43.16       |

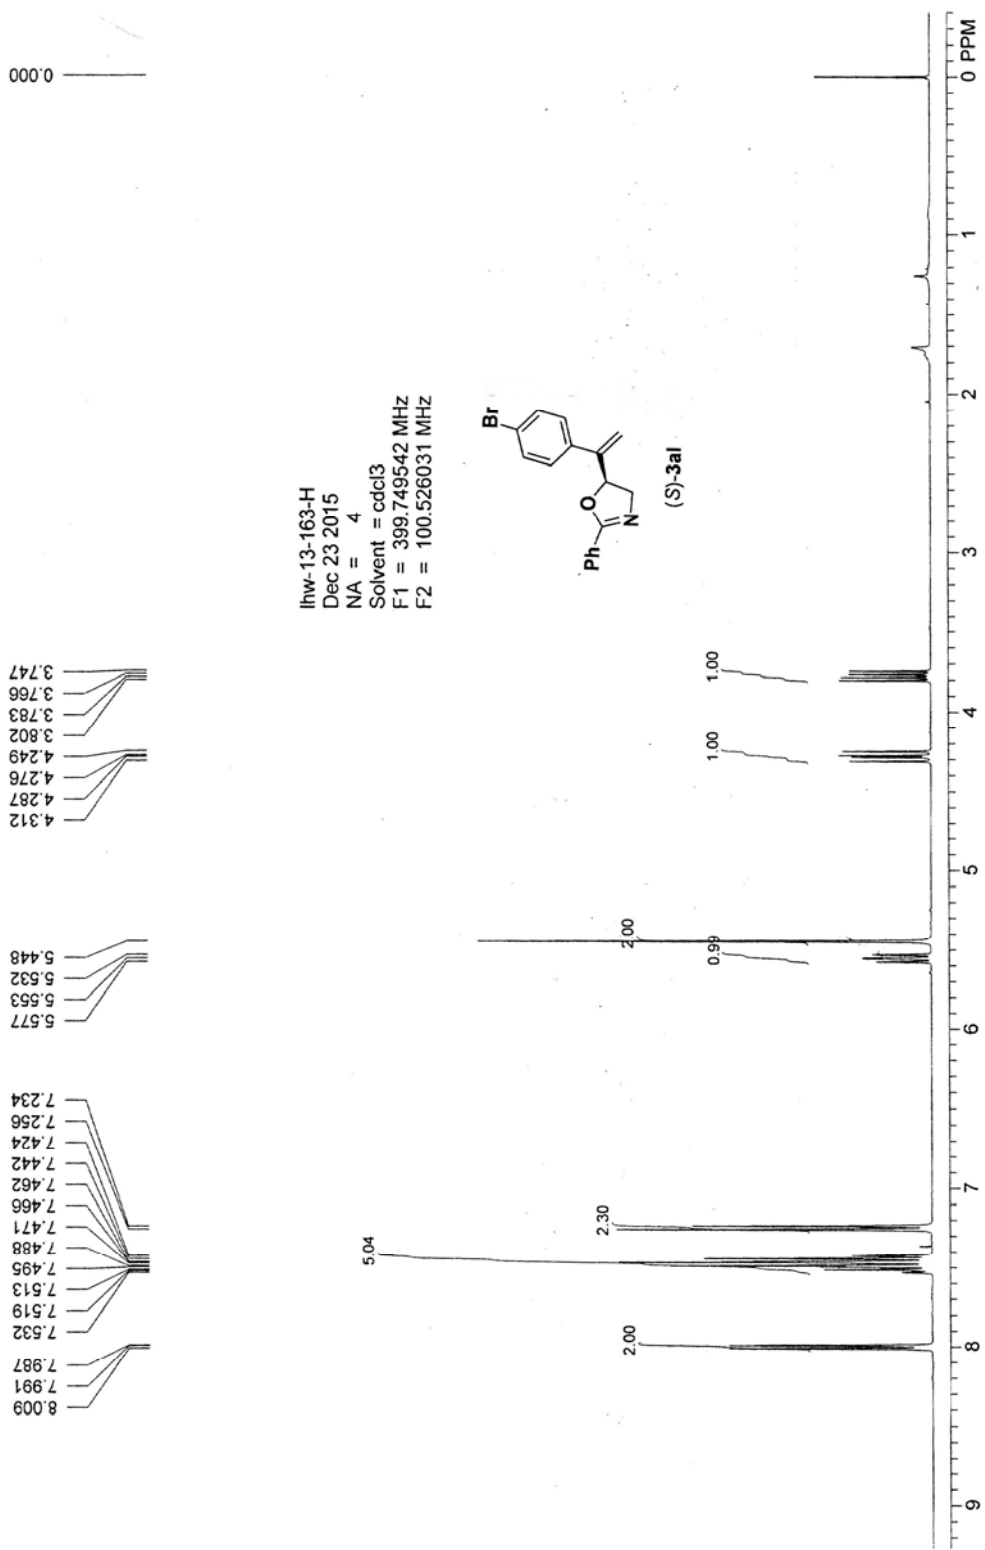

lhw-13-163-C  
Dec 23 2015  
NA = 2000  
Solvent = cdcl3  
F1 = 100.527557 MHz  
F2 = 399.749146 MHz

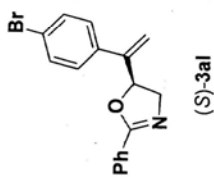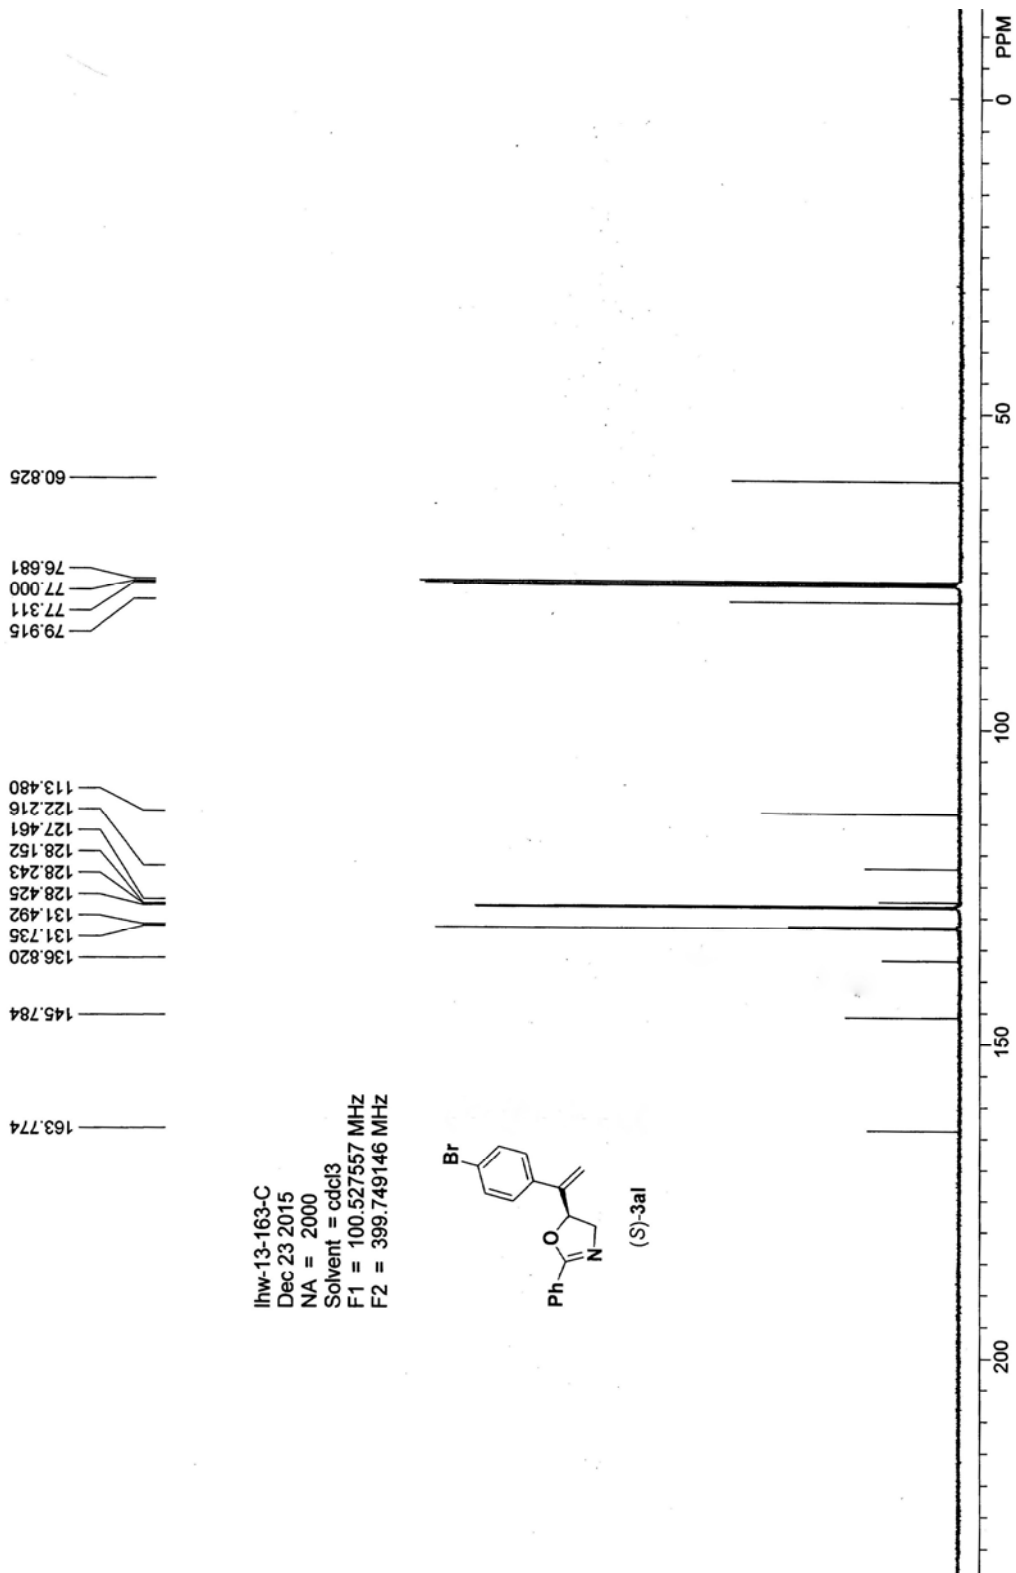

**SAMPLE INFORMATION**

|                   |                             |                  |                       |
|-------------------|-----------------------------|------------------|-----------------------|
| Sample Name:      | lhw-13-163-oz-h-90-10-1-214 | Acquired By:     | Breeze                |
| Sample Type:      | 未知                          | Date Acquired:   | 2016/1/6 13:25:03 CST |
| Vial:             | 1                           | Acq. Method:     | zlg90                 |
| Injection #:      | 28                          | Date Processed:  | 2016/1/6 17:26:01 CST |
| Injection Volume: | 25.00 u                     | Channel Name:    | V02489 ChA            |
| Run Time:         | 35.00 Minutes               | Channel Desc.:   | V02489 ChA.214nm      |
| Column Type:      |                             | Sample Set Name: |                       |

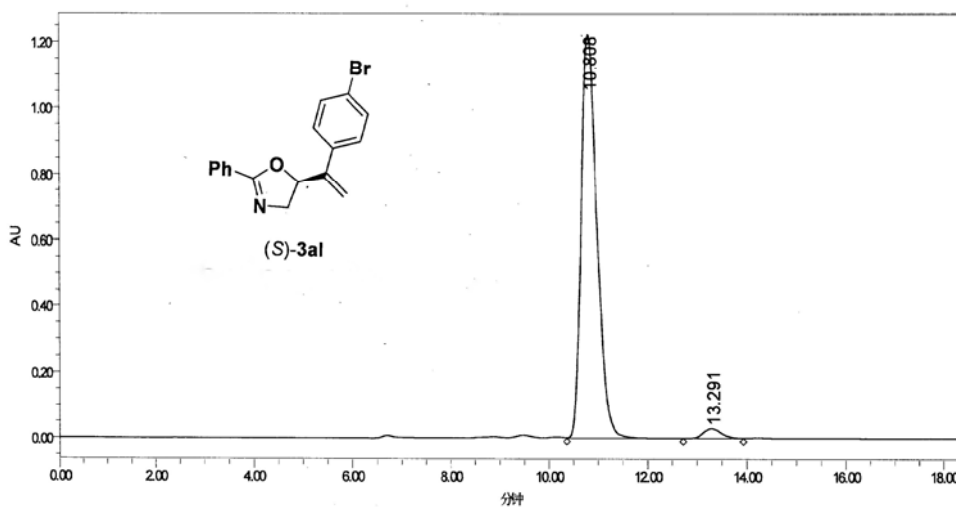

|   | RT (min) | Area (峰面积) | %Area | Height (峰高) | % Height |
|---|----------|------------|-------|-------------|----------|
| 1 | 10.808   | 27190151   | 97.20 | 1224105     | 97.58    |
| 2 | 13.291   | 783345     | 2.80  | 30294       | 2.42     |



**SAMPLE INFORMATION**

|                   |                           |                  |                       |
|-------------------|---------------------------|------------------|-----------------------|
| Sample Name:      | zy-1-124-az-h-90-10-1-214 | Acquired By:     | Breeze                |
| Sample Type:      | 未知                        | Date Acquired:   | 2016/1/6 13:44:38 CST |
| Val:              | 1                         | Acq. Method:     | zg90                  |
| Injection #:      | 29                        | Date Processed:  | 2016/1/6 17:26:10 CST |
| Injection Volume: | 25.00 ul                  | Channel Name:    | V2489 ChA             |
| Run Time:         | 35.00 Minutes             | Channel Desc.:   | V2489 ChA.214nm       |
| Column Type:      |                           | Sample Set Name: |                       |

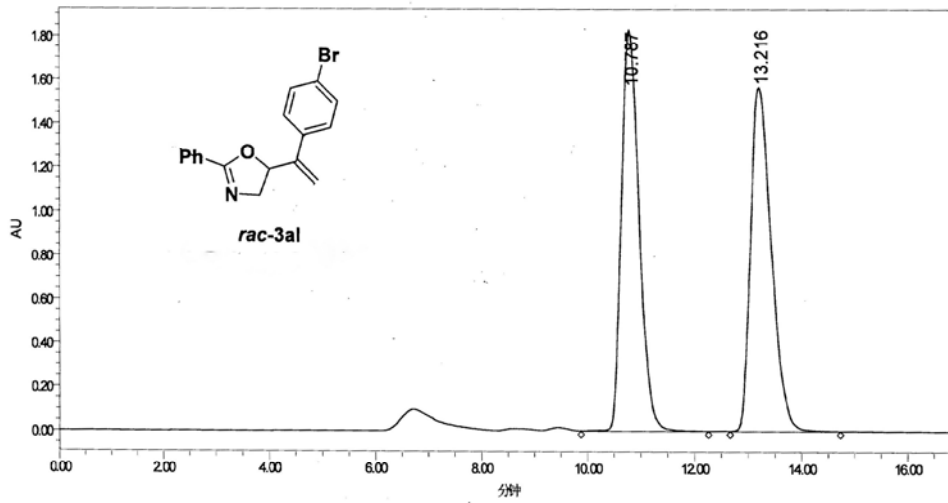

|   | RT (min) | Area (峰面积) | %Area | Hight (峰高) | % Hight |
|---|----------|------------|-------|------------|---------|
| 1 | 10.787   | 42544821   | 50.18 | 1831245    | 53.90   |
| 2 | 13.216   | 42242802   | 49.82 | 1566207    | 46.10   |

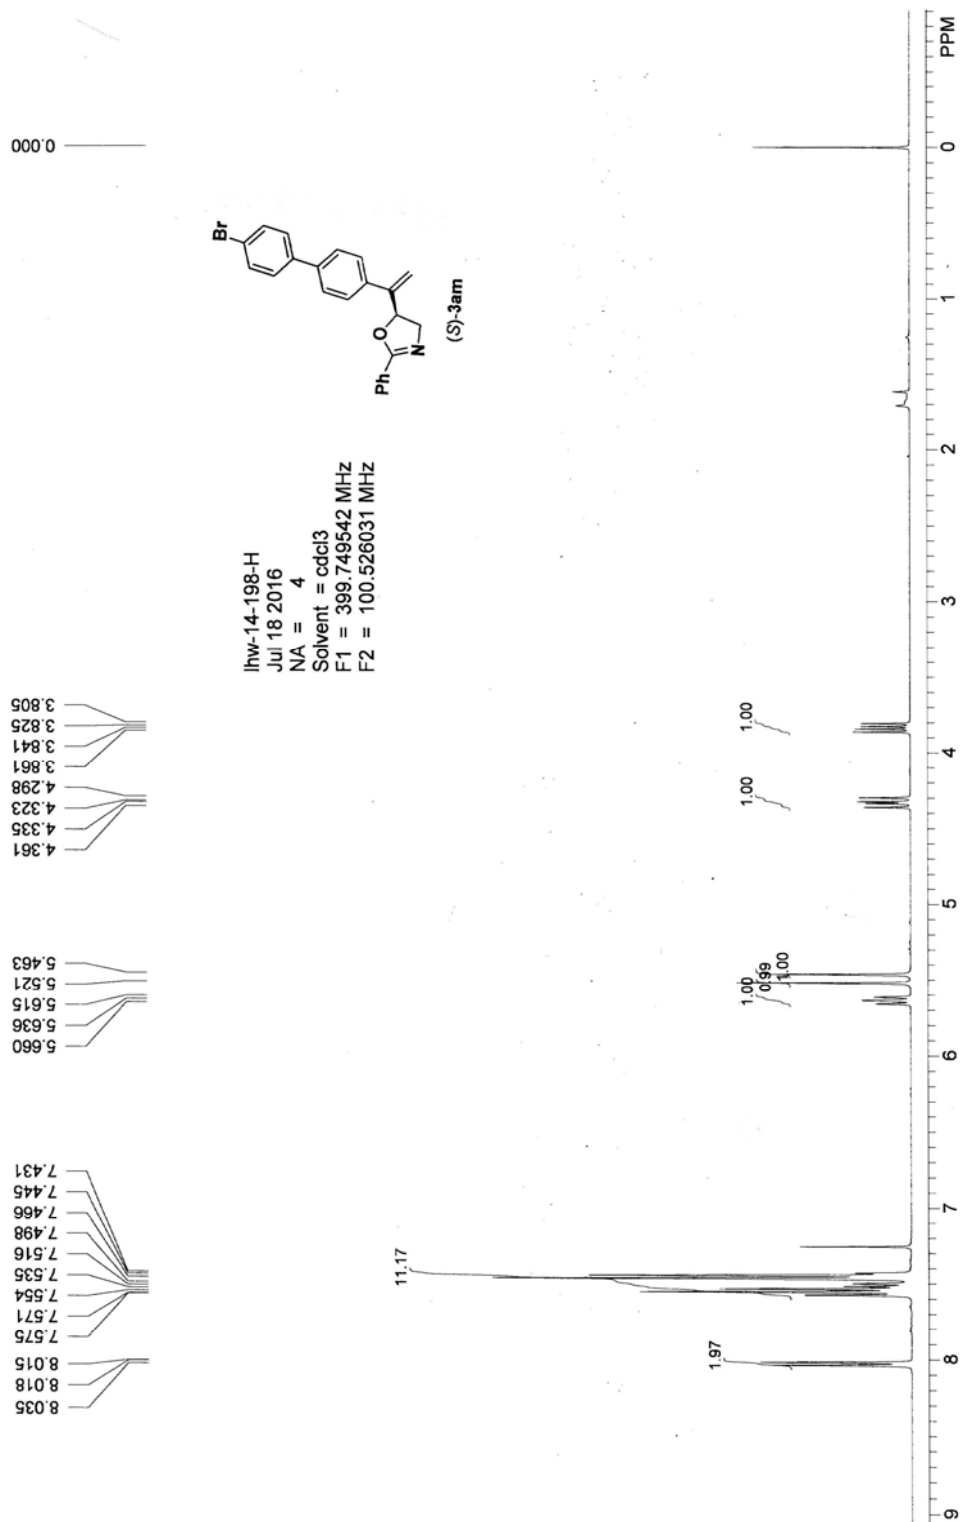

lhw-14-196-C  
Jul 19 2016  
NA = 1000  
Solvent = cdcl3  
F1 = 100.527557 MHz  
F2 = 399.749146 MHz

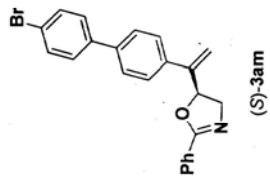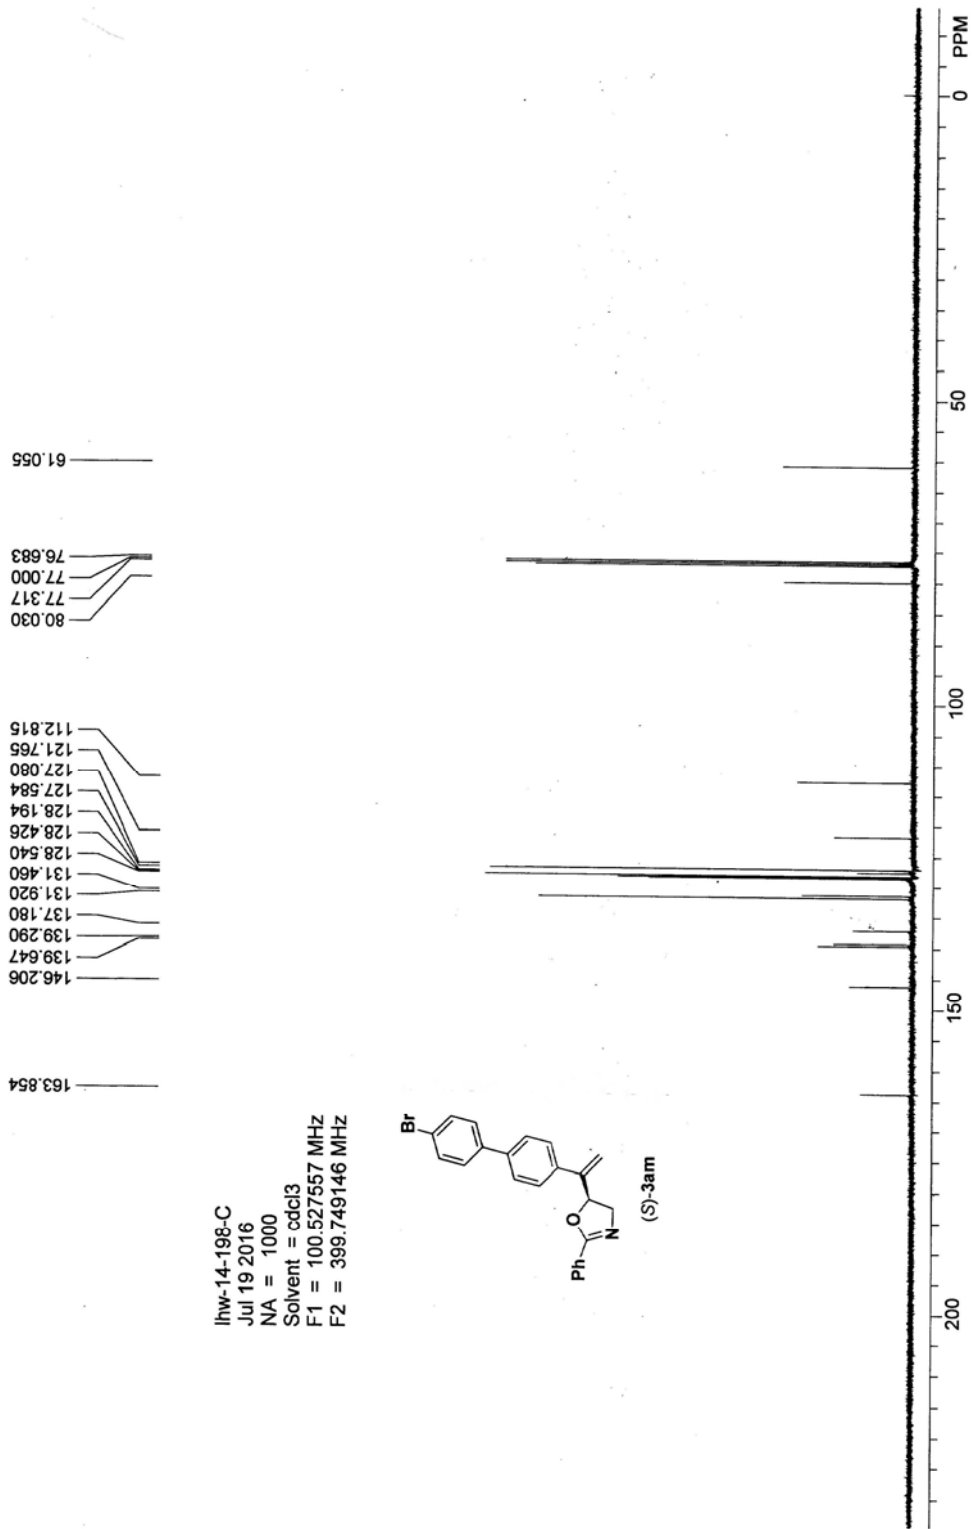

# 1hw-14-198

实验时间: 2016-07-18, 13:15:08

报告时间: 2016-07-18, 13:17:21

谱图文件: F:\slf\luohongwen\2016-07-18\1hw-14-198\1hw-14-198-OZ-H-90+10-1-214.org

实验内容简介:  
OZ-H 90:10  
214nm 1.0ml/min

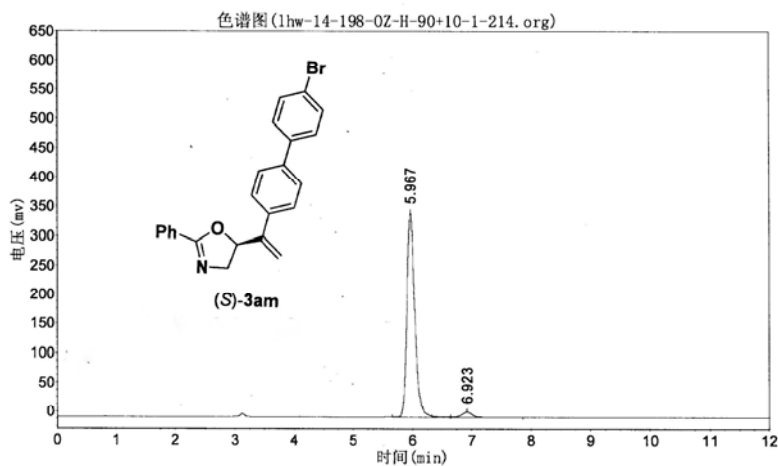

分析结果表

| 峰号 | 峰名 | 保留时间  | 峰高         | 峰面积         | 含量       |
|----|----|-------|------------|-------------|----------|
| 1  |    | 5.967 | 348293.844 | 3256140.000 | 96.6506  |
| 2  |    | 6.923 | 8937.972   | 112839.289  | 3.3494   |
| 总计 |    |       | 357231.815 | 3368979.289 | 100.0000 |

# lhw-14-195-rac

实验时间: 2016-07-18, 12:40:35

报告时间: 2016-07-18, 12:42:16

谱图文件: F:\s1f\luohongwen\2016-07-18\lhw-14-195-rac\lhw-14-195-rac-OZ-H-90+10-1-214.org

实验内容简介:  
OZ-H 90:10  
214nm 1.0ml/min

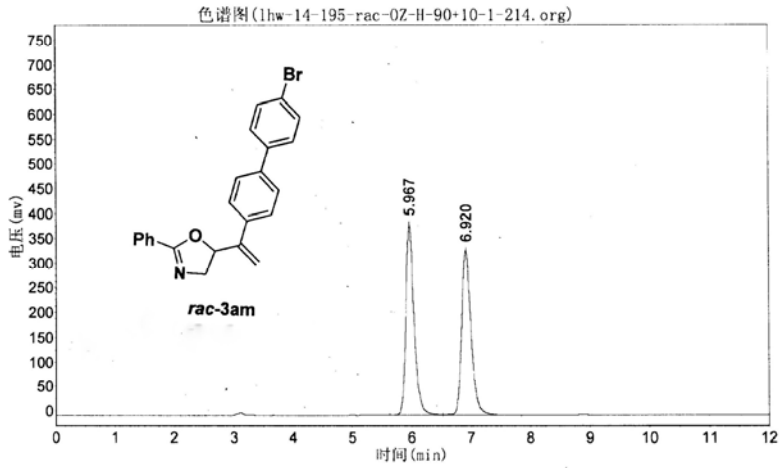

分析结果表

| 峰号 | 峰名 | 保留时间  | 峰高         | 峰面积         | 含量       |
|----|----|-------|------------|-------------|----------|
| 1  |    | 5.967 | 385292.156 | 3731798.500 | 50.2240  |
| 2  |    | 6.920 | 333933.594 | 3698509.500 | 49.7760  |
| 总计 |    |       | 719225.750 | 7430308.000 | 100.0000 |

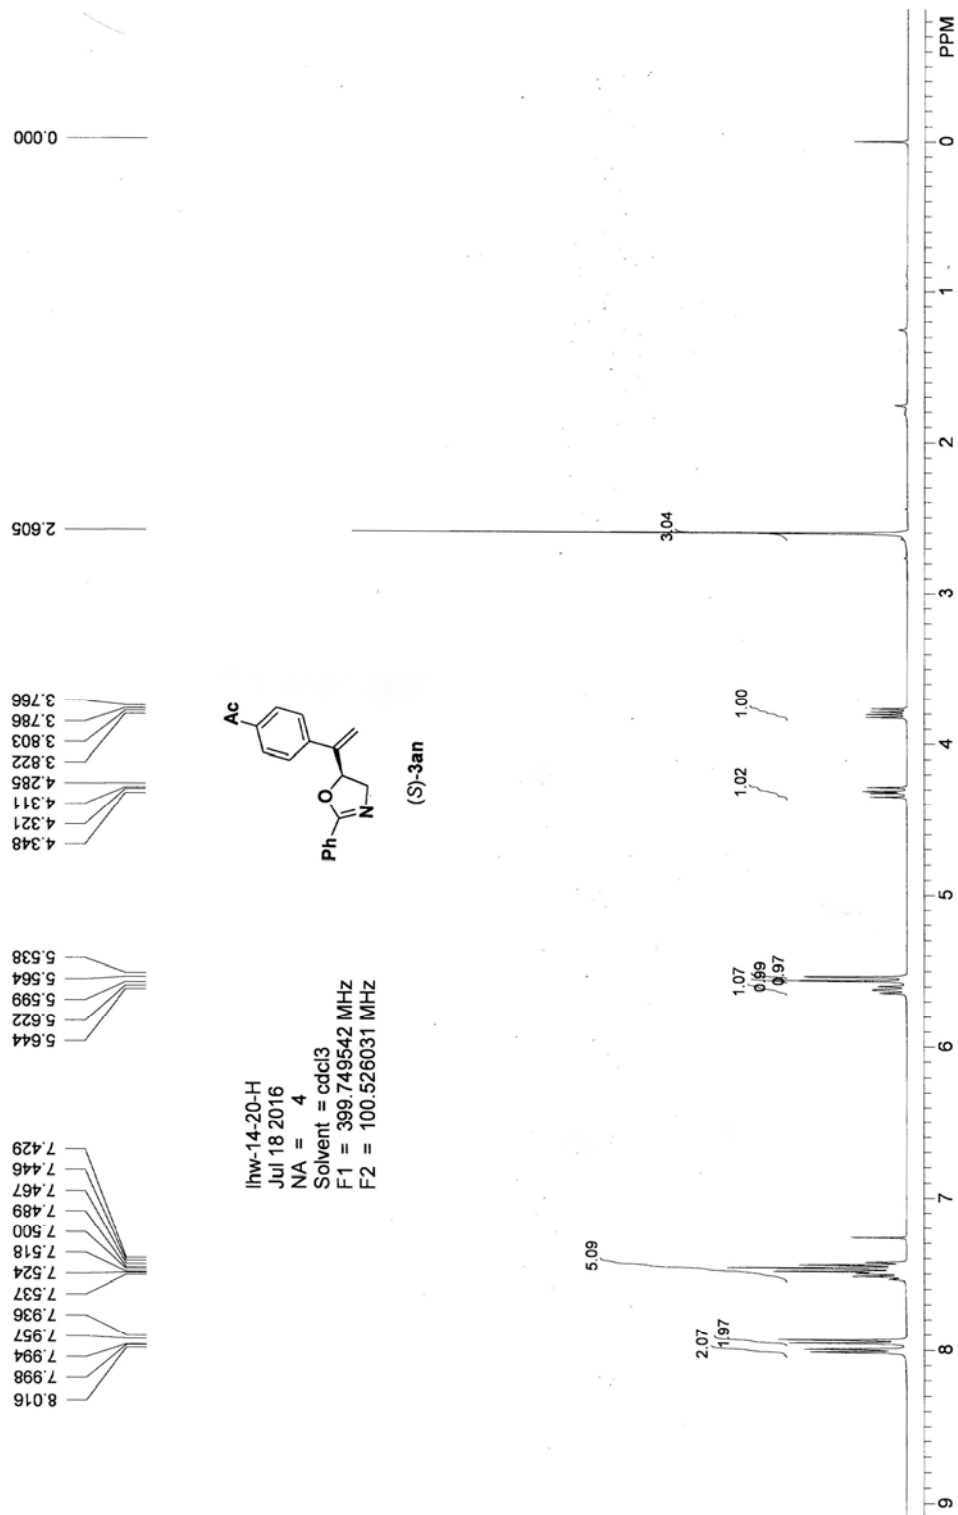

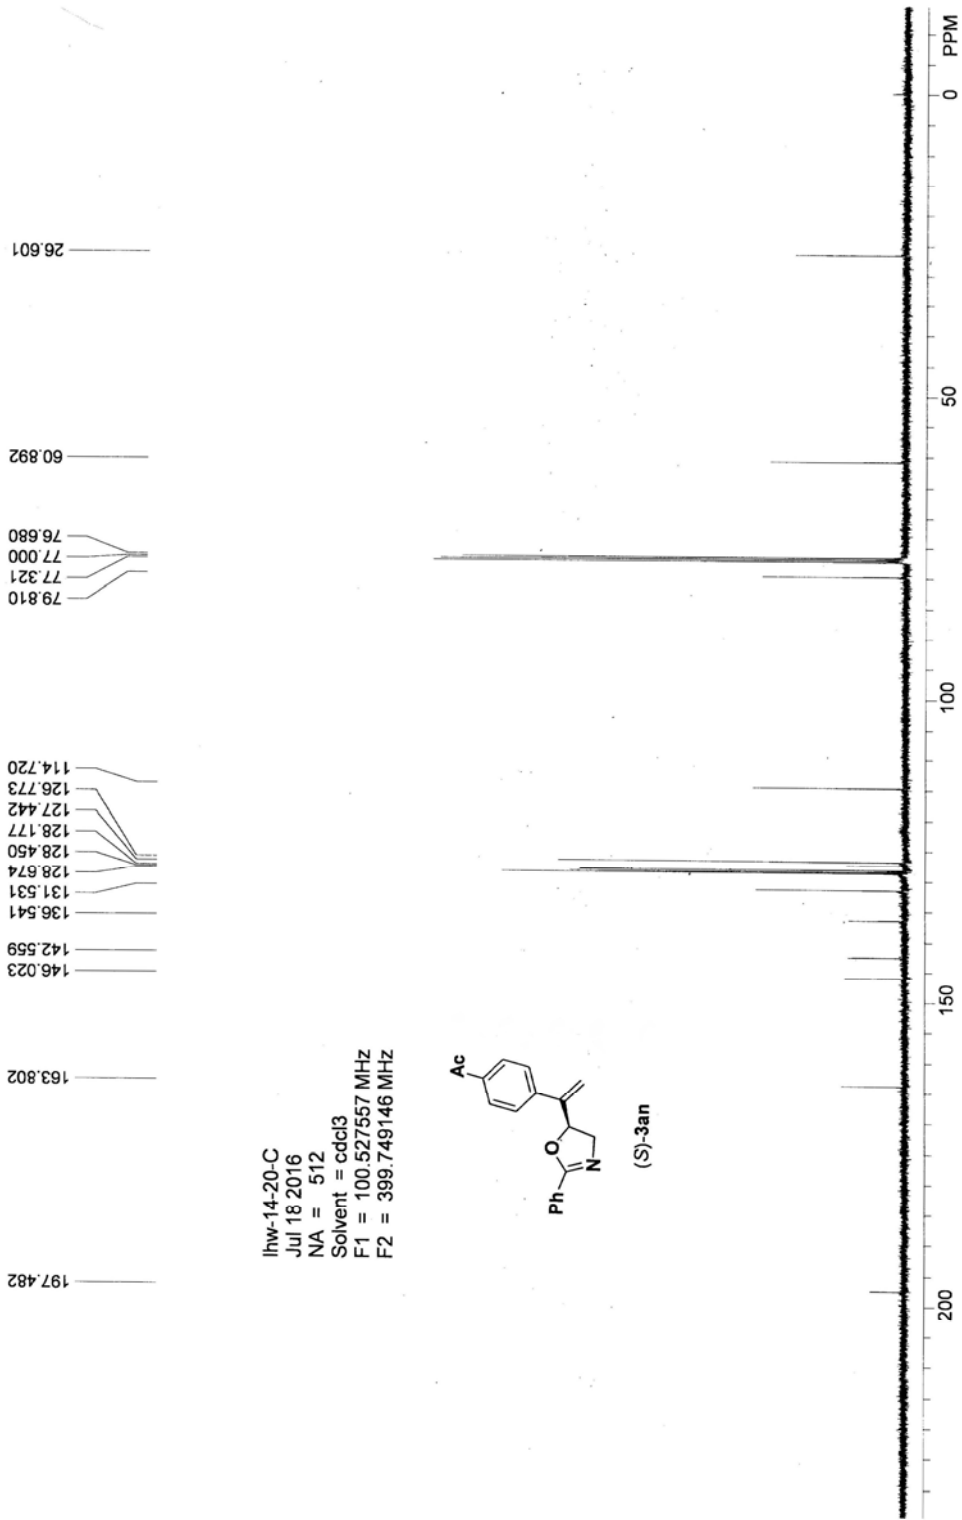

# LHW-14-20-OZ-H-70-30-0.8-214

实验时间: 2016-03-18, 18:11:12

报告时间: 2016-03-18, 18:12:16

谱图文件: F:\zhuguangji\lhw\2016-03-17\lhw-14-20-OZ-H-70-30-0.8-214.org

实验内容简介:

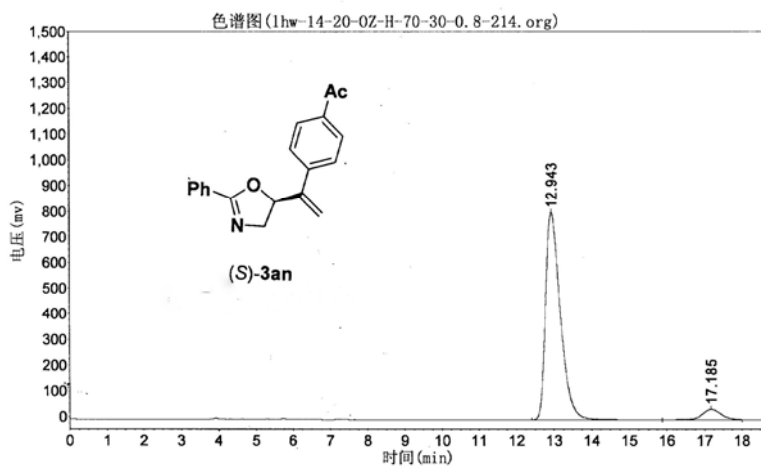

分析结果表

| 峰号 | 峰名 | 保留时间   | 峰高         | 峰面积          | 含量       |
|----|----|--------|------------|--------------|----------|
| 1  |    | 12.943 | 807325.875 | 21977226.000 | 93.8155  |
| 2  |    | 17.185 | 40617.402  | 1448788.250  | 6.1845   |
| 总计 |    |        | 847943.277 | 23426014.250 | 100.0000 |



# LHW-14-20-RAC-OZ-H-70-30-0.8-214

实验时间: 2016-03-18, 17:51:31

报告时间: 2016-03-18, 17:59:25

谱图文件: F:\zhuguangjiong\lhw\2016-03-17\lhw-14-20-RAC-OZ-H-70-30-0.8-214.org

实验内容简介:

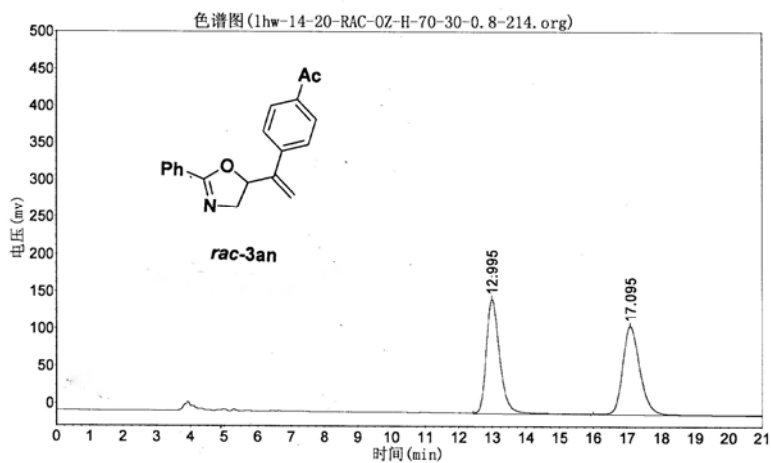

分析结果表

| 峰号 | 峰名 | 保留时间   | 峰高         | 峰面积         | 含量       |
|----|----|--------|------------|-------------|----------|
| 1  |    | 12.995 | 152752.203 | 4212635.500 | 50.1037  |
| 2  |    | 17.095 | 117331.641 | 4195202.000 | 49.8963  |
| 总计 |    |        | 270083.844 | 8407837.500 | 100.0000 |

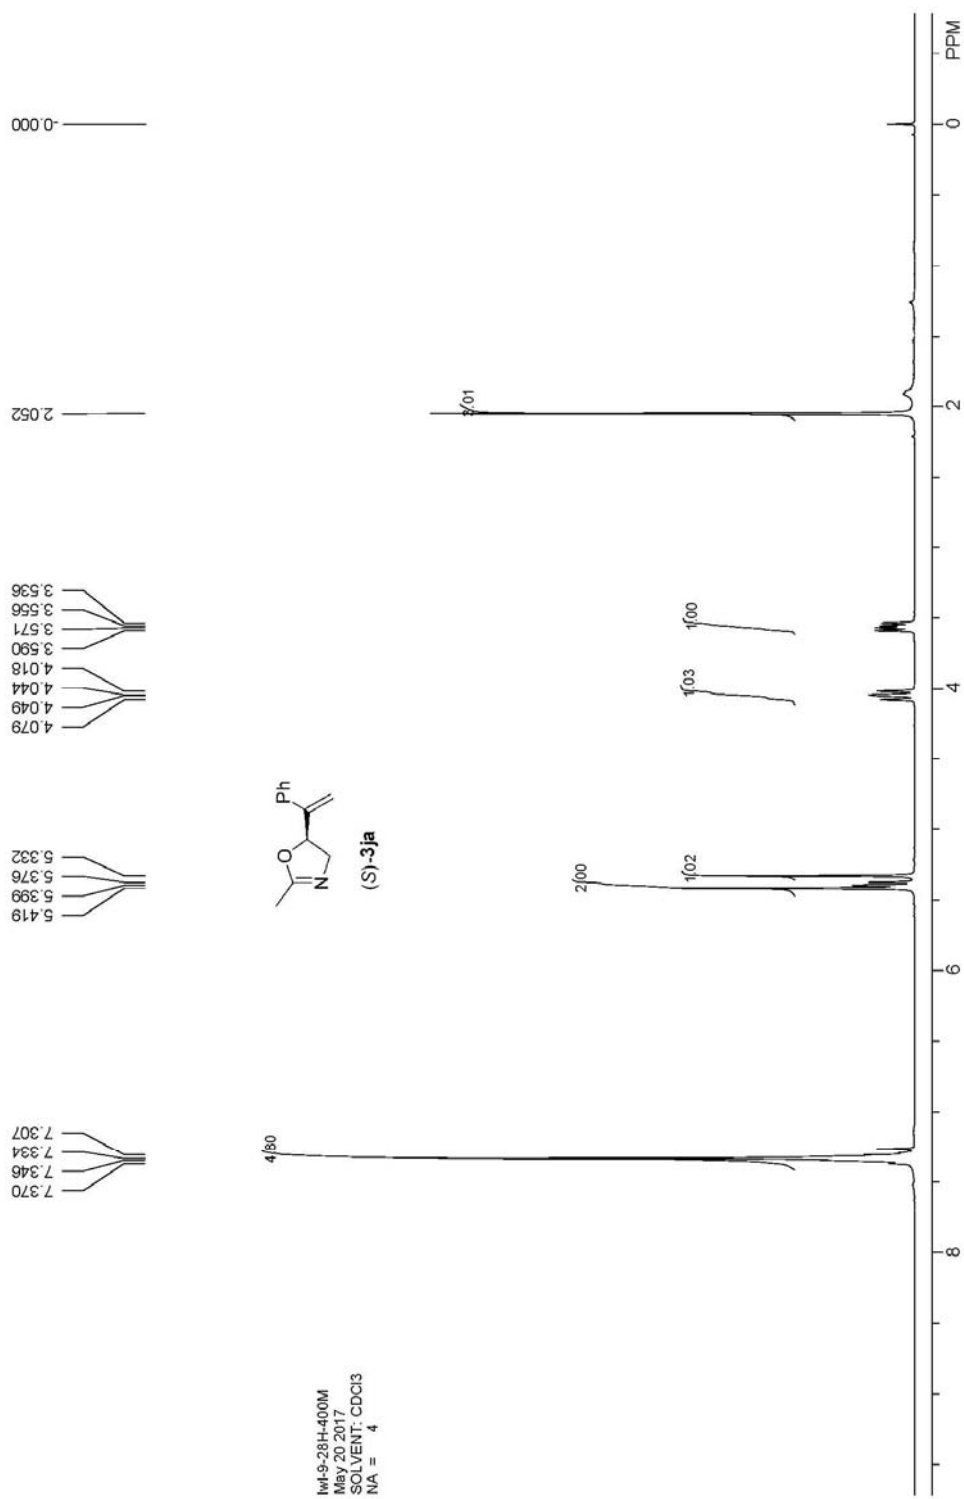

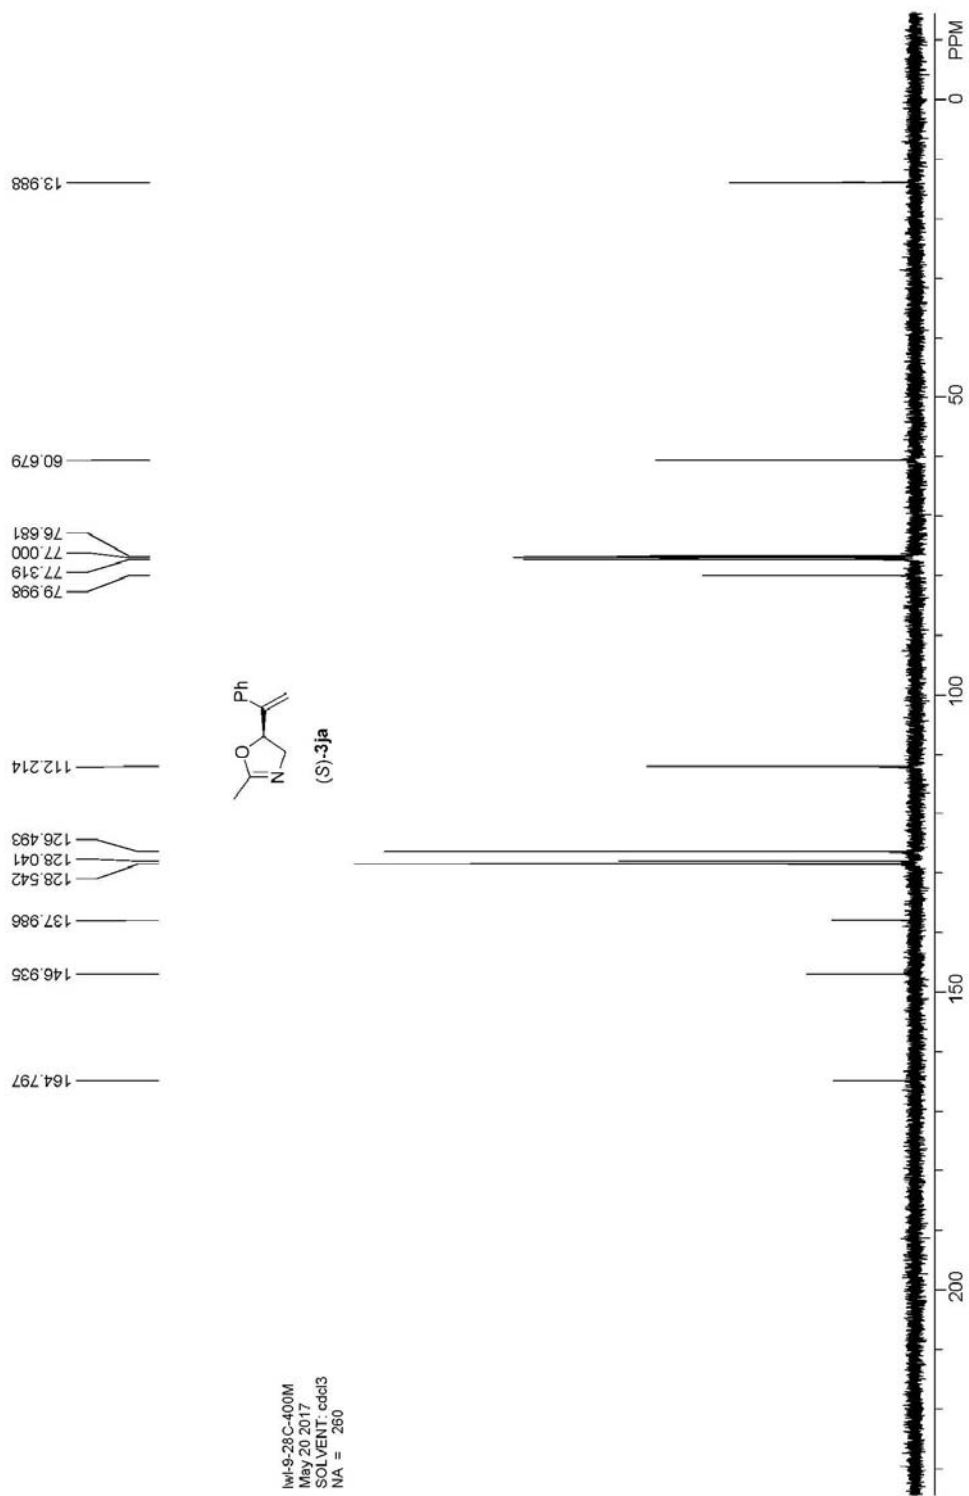

# 1w1-9-28

实验时间: 2017-03-31, 16:02:30

报告时间: 2017-03-31, 16:03:45

谱图文件: F:\slf\lw1\2017-03-31\lw1-9-28\新建文件夹\lw1-9-28-OZ-H-98+2-1.0-214.org

实验内容简介:  
OZ-H 98:2  
214nm 1.0ml/min

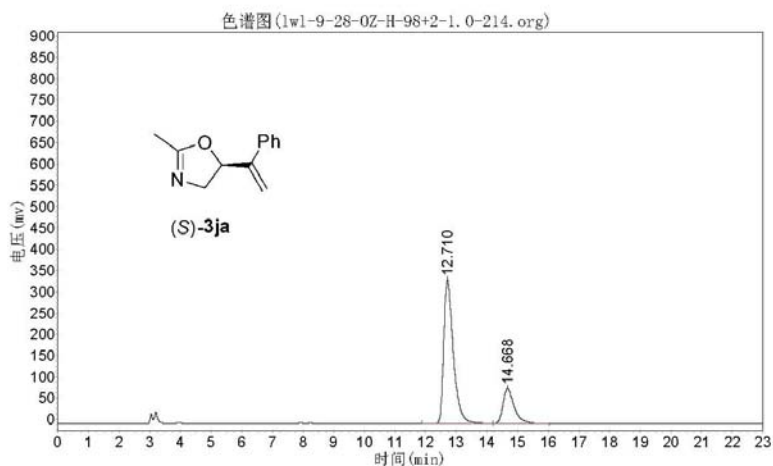

分析结果表

| 峰号 | 峰名 | 保留时间   | 峰高         | 峰面积         | 含量       |
|----|----|--------|------------|-------------|----------|
| 1  |    | 12.710 | 336314.750 | 7253600.000 | 78.1341  |
| 2  |    | 14.668 | 81636.531  | 2029926.375 | 21.8659  |
| 总计 |    |        | 417951.281 | 9283526.375 | 100.0000 |

## 1w1-9-30-rac

实验时间: 2017-03-31, 15:14:08

报告时间: 2017-03-31, 15:24:06

谱图文件: F:\sif\1w1\2017-03-31\1w1-9-30-rac\1w1-9-30-rac-OZ-H-98+2-1.0-214-2.org

实验内容简介:  
OZ-H 98:2  
214nm 1.0ml/min

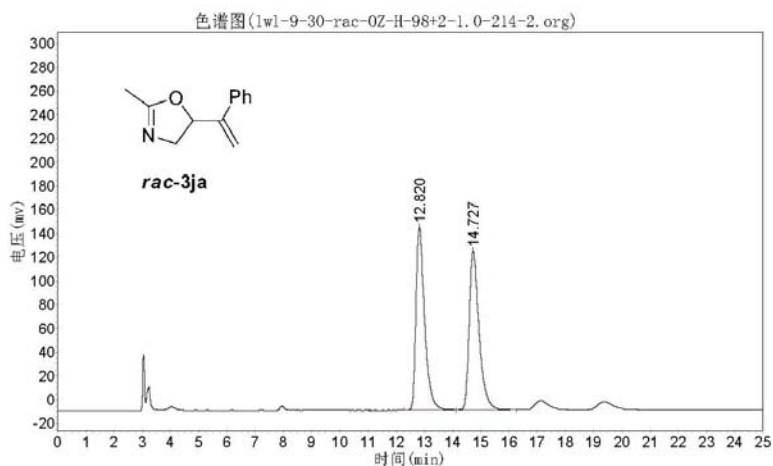

分析结果表

| 峰号 | 峰名 | 保留时间   | 峰高         | 峰面积         | 含量       |
|----|----|--------|------------|-------------|----------|
| 1  |    | 12.820 | 154141.719 | 3280217.500 | 50.1779  |
| 2  |    | 14.727 | 133832.453 | 3256964.250 | 49.8221  |
| 总计 |    |        | 287974.172 | 6537181.750 | 100.0000 |

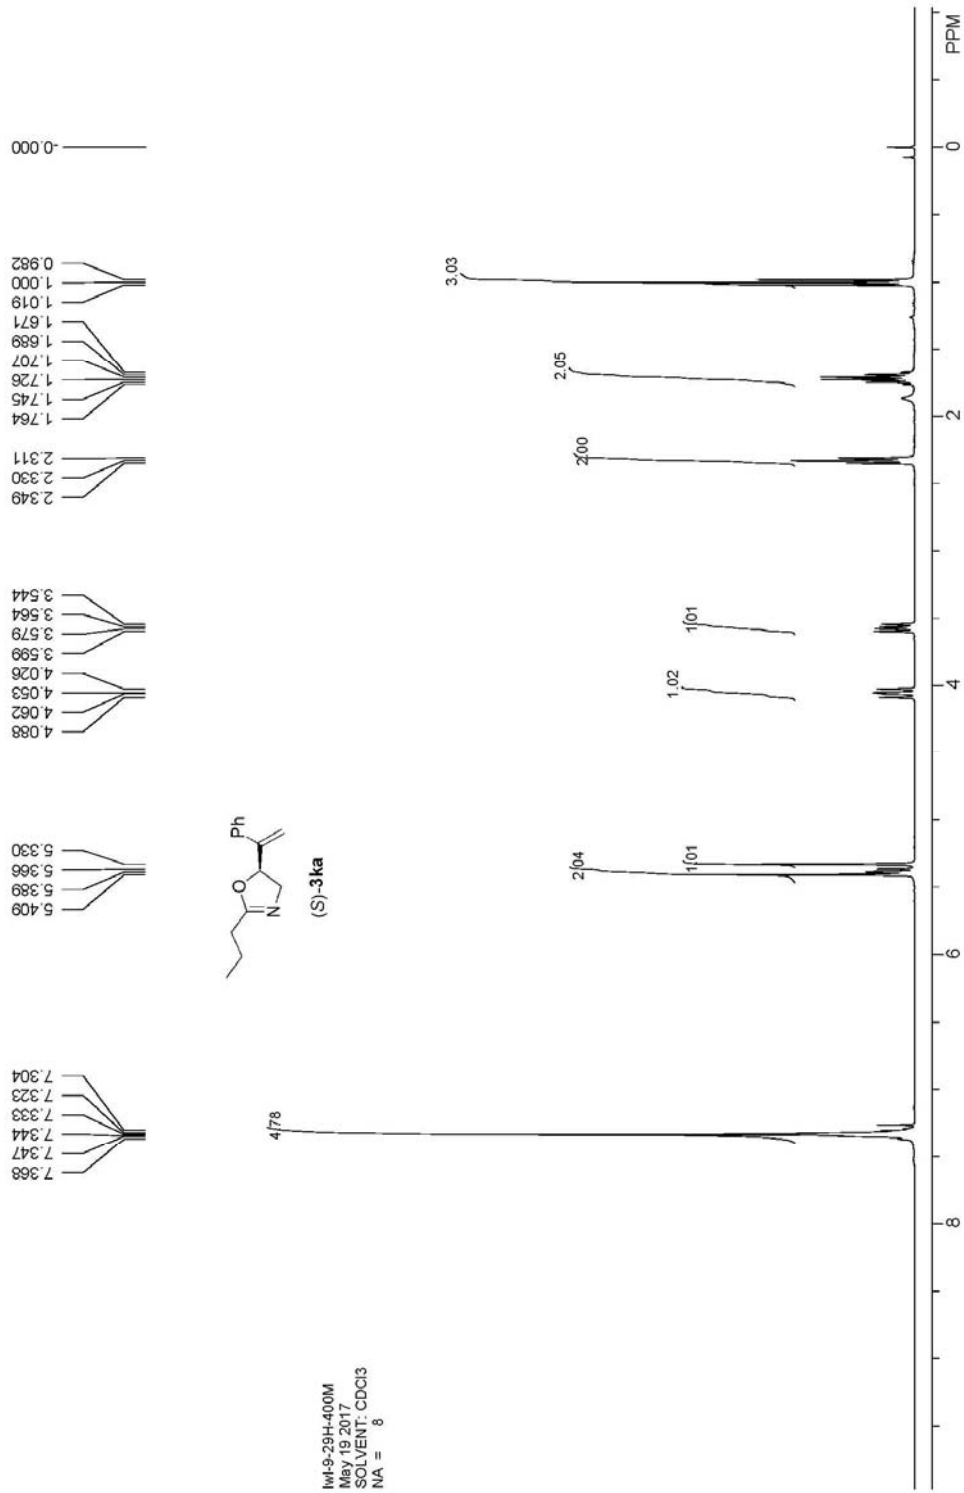

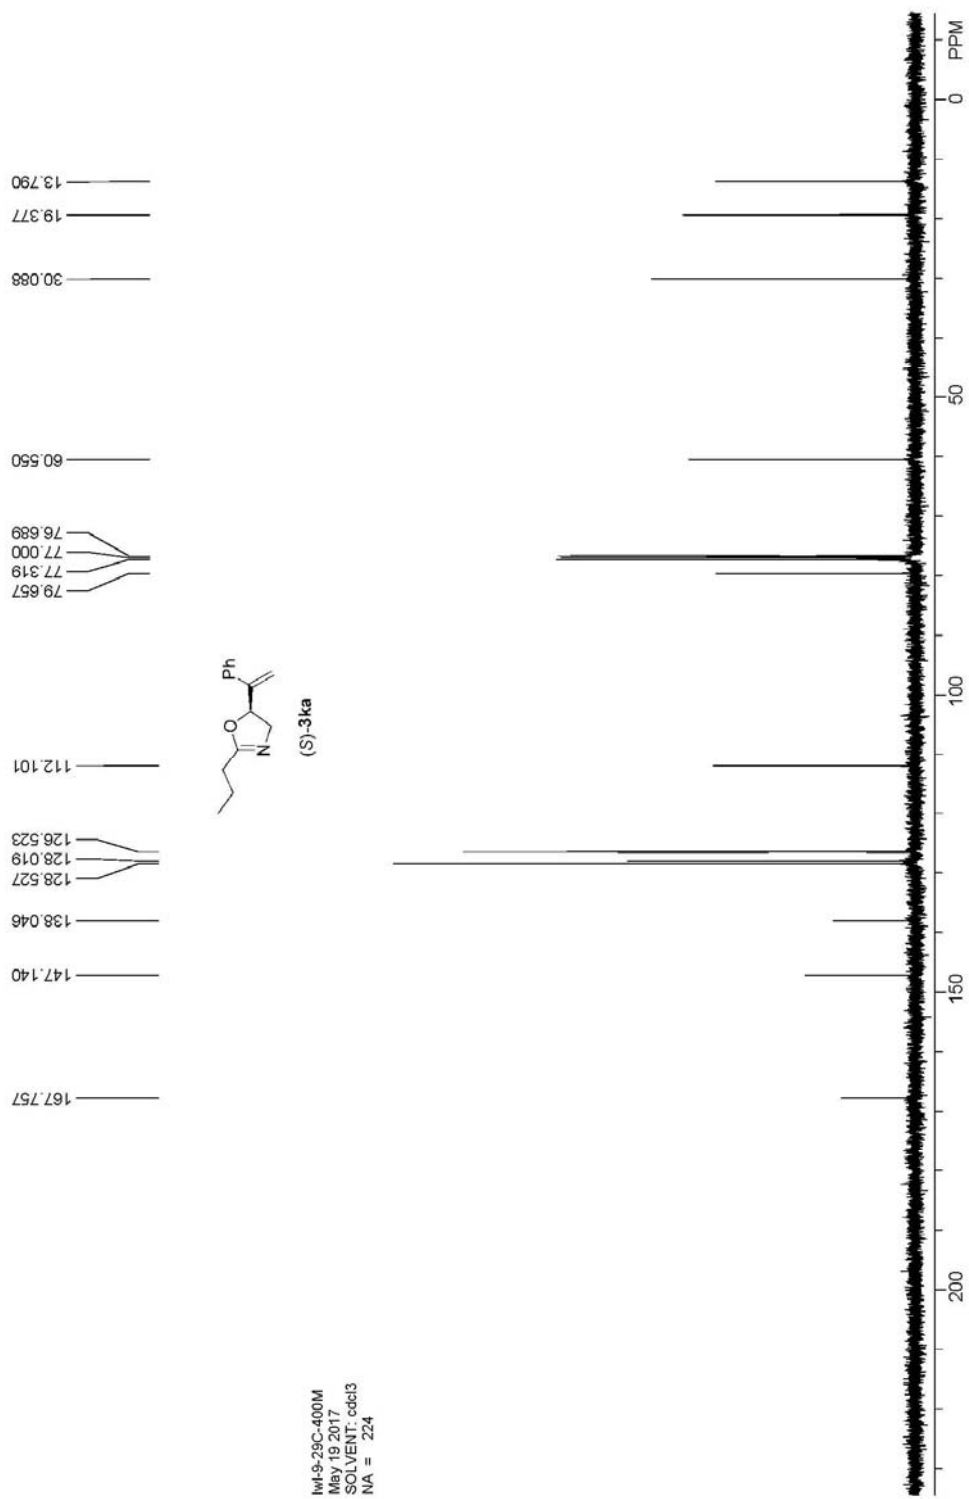

## 1w1-9-29

实验时间: 2017-03-31, 10:41:58

报告时间: 2017-03-31, 10:44:16

谱图文件: F:\slf\lw1\2017-03-31\lw1-9-29\新建文件夹\lw1-9-29-OZ-H-70+30-0.6-214.org

实验内容简介:  
OZ-H 70:30  
214nm 0.6ml/min

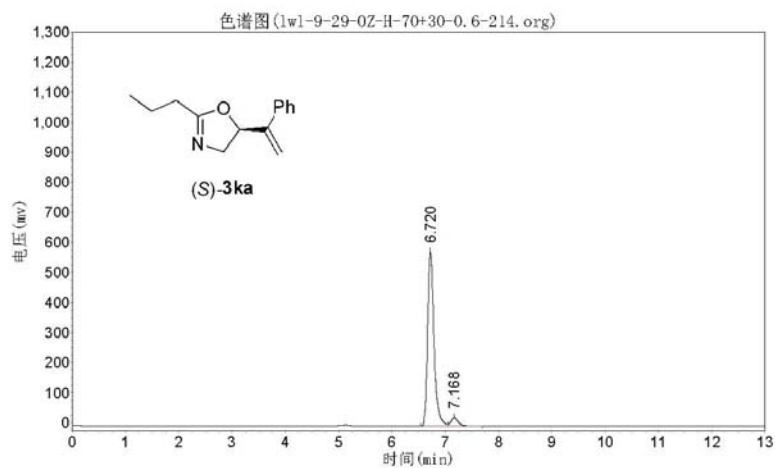

分析结果表

| 峰号 | 峰名 | 保留时间  | 峰高         | 峰面积         | 含量       |
|----|----|-------|------------|-------------|----------|
| 1  |    | 6.720 | 580200.188 | 4842645.000 | 94.6355  |
| 2  |    | 7.168 | 28172.840  | 274507.344  | 5.3645   |
| 总计 |    |       | 608373.027 | 5117152.344 | 100.0000 |



## LWL-9-31-RAC

实验时间: 2017-03-31, 10:16:26

报告时间: 2017-03-31, 10:18:58

谱图文件: F:\slf\lwl\2017-03-31\lwl-9-31-rac\lwl-9-31-rac-OZ-H-70+30-0.6-214.org

实验内容简介:  
OZ-H 70:30  
214nm 0.6ml/min

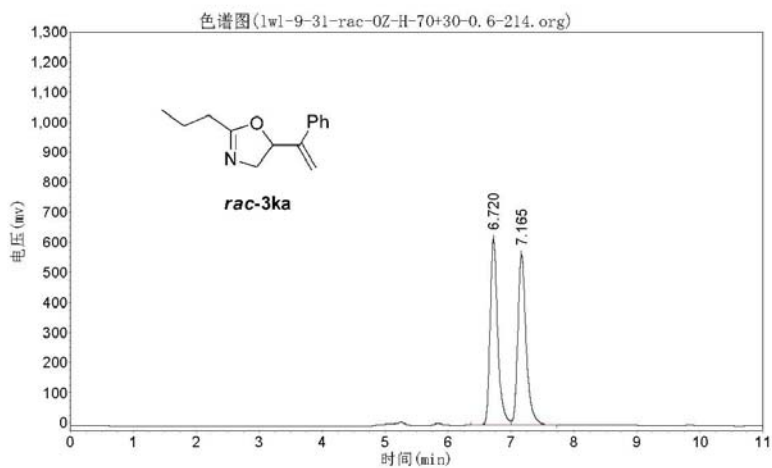

分析结果表

| 峰号 | 峰名 | 保留时间  | 峰高          | 峰面积          | 含量       |
|----|----|-------|-------------|--------------|----------|
| 1  |    | 6.720 | 619916.875  | 5211762.000  | 49.9211  |
| 2  |    | 7.165 | 568121.063  | 5228229.000  | 50.0789  |
| 总计 |    |       | 1188037.938 | 10439991.000 | 100.0000 |

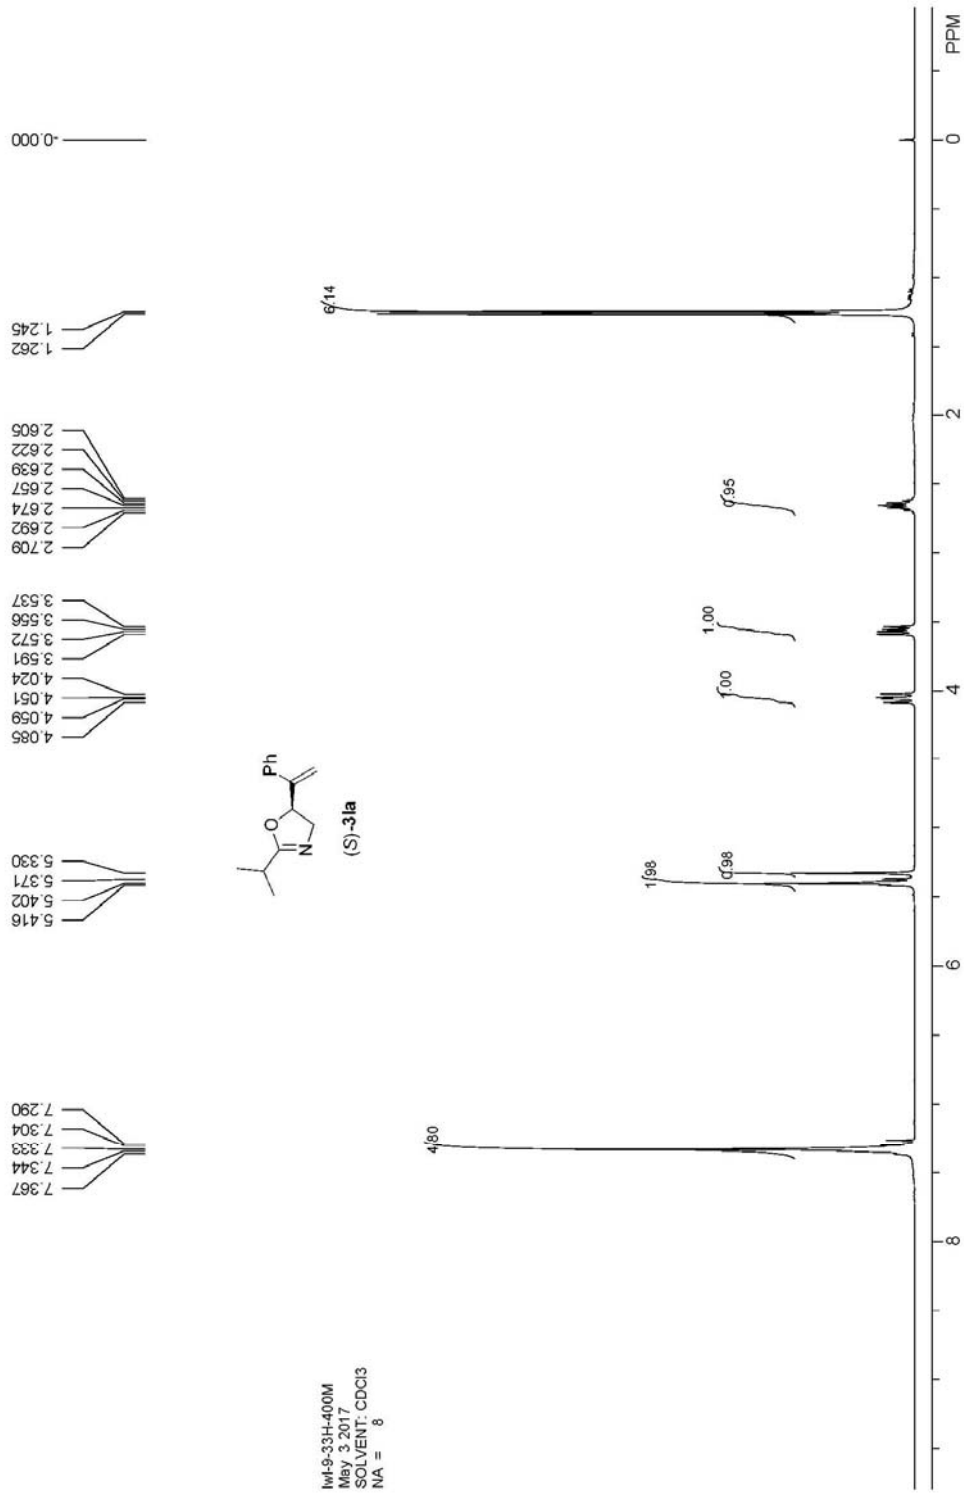

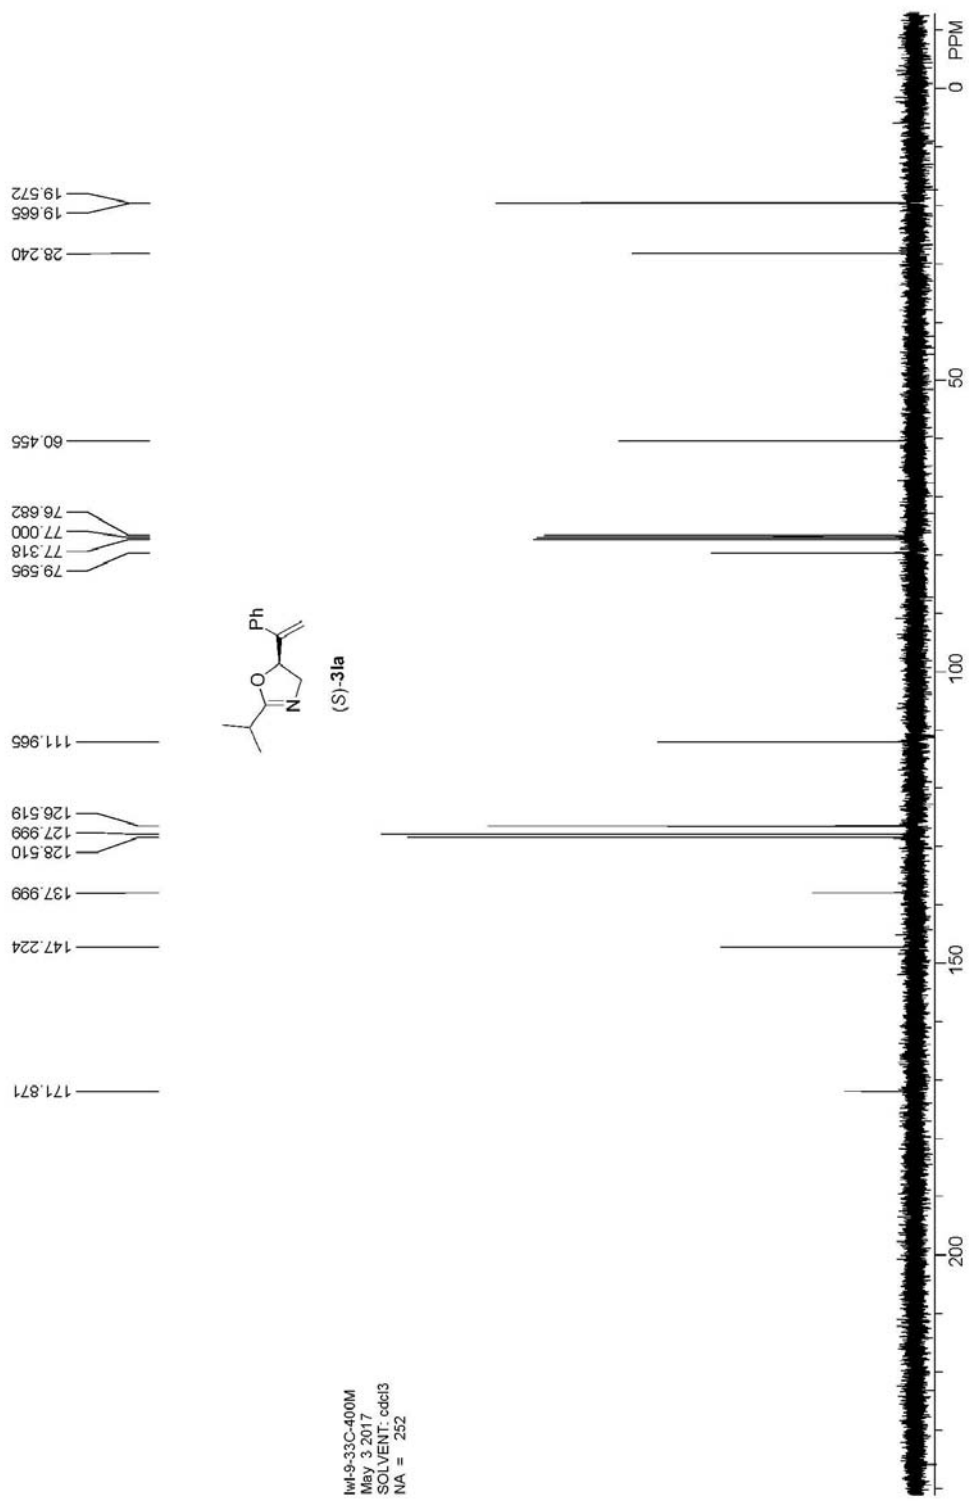

## 1w1-9-33

实验时间: 2017-04-05, 11:32:43

报告时间: 2017-04-05, 11:33:39

谱图文件: F:\slf\lw1\2017-04-05\lw1-9-33\新建文件夹\lw1-9-33-oz-h-98+2-1.4-214.org

实验内容简介:  
OZ-H 98:2  
214nm 1.0ml/min

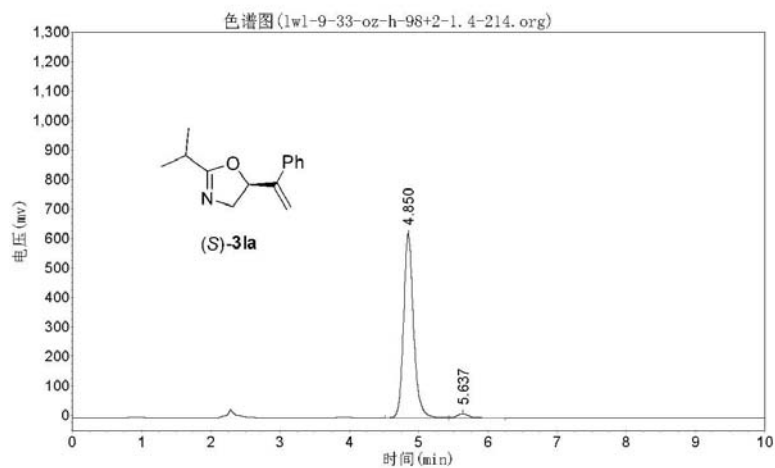

分析结果表

| 峰号 | 峰名 | 保留时间  | 峰高         | 峰面积         | 含量       |
|----|----|-------|------------|-------------|----------|
| 1  |    | 4.850 | 623545.000 | 6268123.500 | 97.3602  |
| 2  |    | 5.637 | 14384.115  | 169953.422  | 2.6398   |
| 总计 |    |       | 637929.115 | 6438076.922 | 100.0000 |

## 1w1-9-35-rac

实验时间: 2017-04-05, 11:09:34

报告时间: 2017-04-05, 11:12:18

谱图文件: F:\sif\lw1\2017-04-05\1w1-9-36-rac\lw1-9-35-rac-oz-h-98+2-1.4-214.org

实验内容简介:  
OZ-H 98:2  
214nm 1.0ml/min

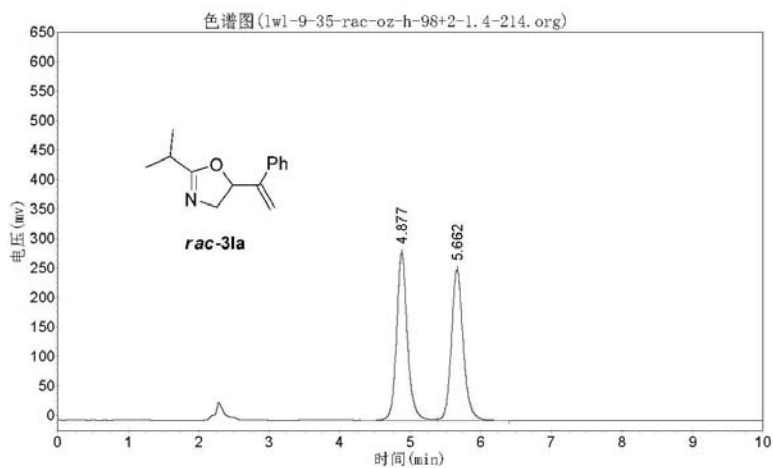

分析结果表

| 峰号 | 峰名 | 保留时间  | 峰高         | 峰面积         | 含量       |
|----|----|-------|------------|-------------|----------|
| 1  |    | 4.877 | 284761.500 | 3058894.250 | 50.3683  |
| 2  |    | 5.662 | 255918.828 | 3014158.500 | 49.6317  |
| 总计 |    |       | 540680.328 | 6073052.750 | 100.0000 |

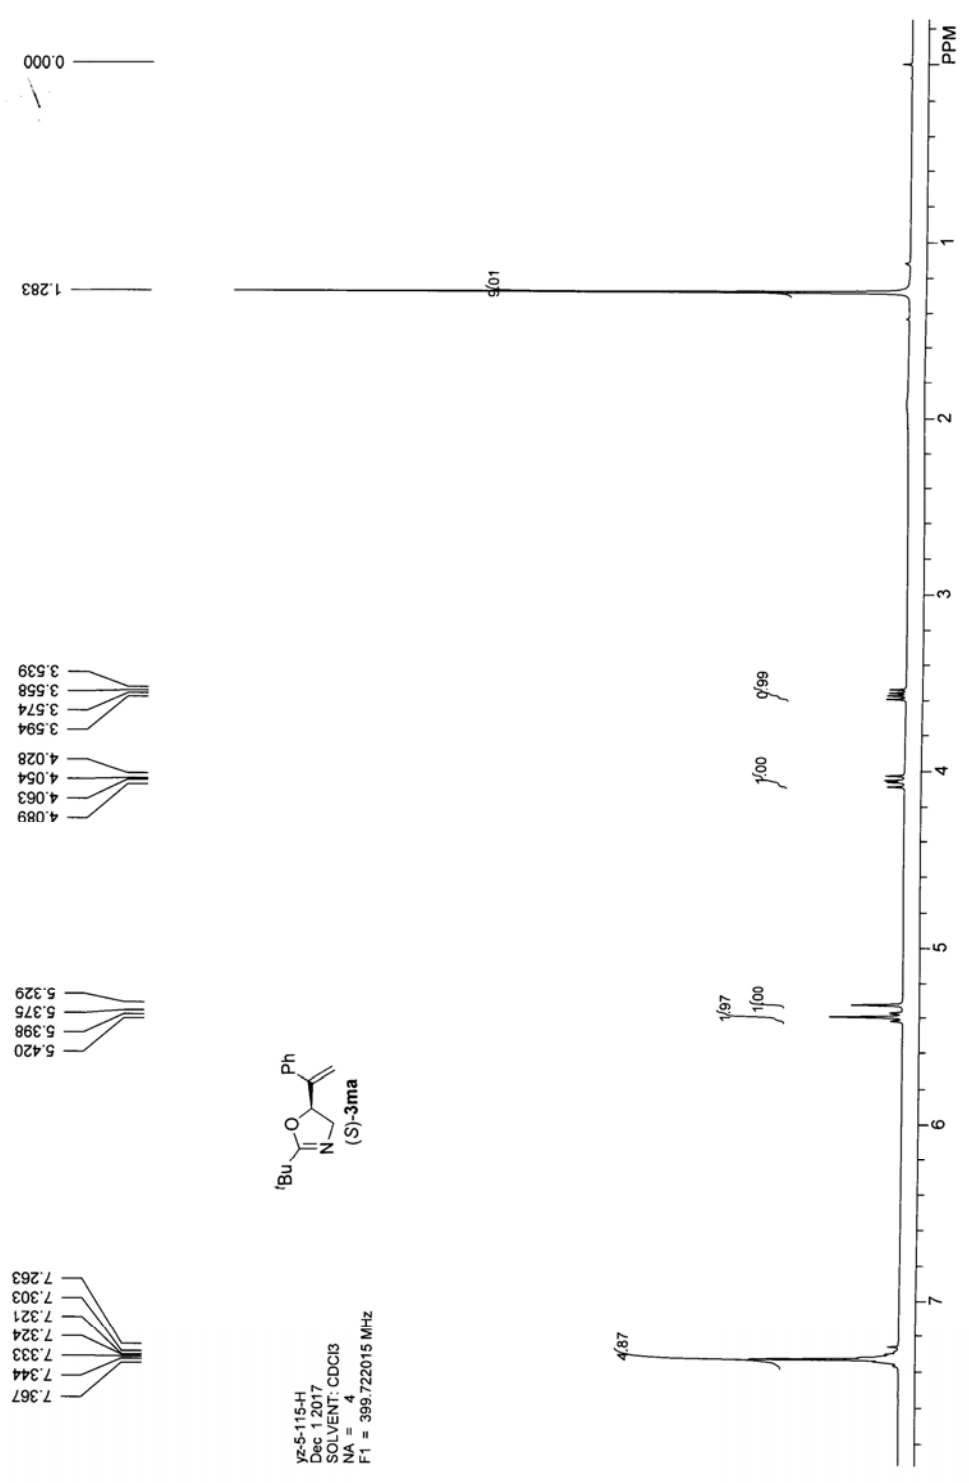

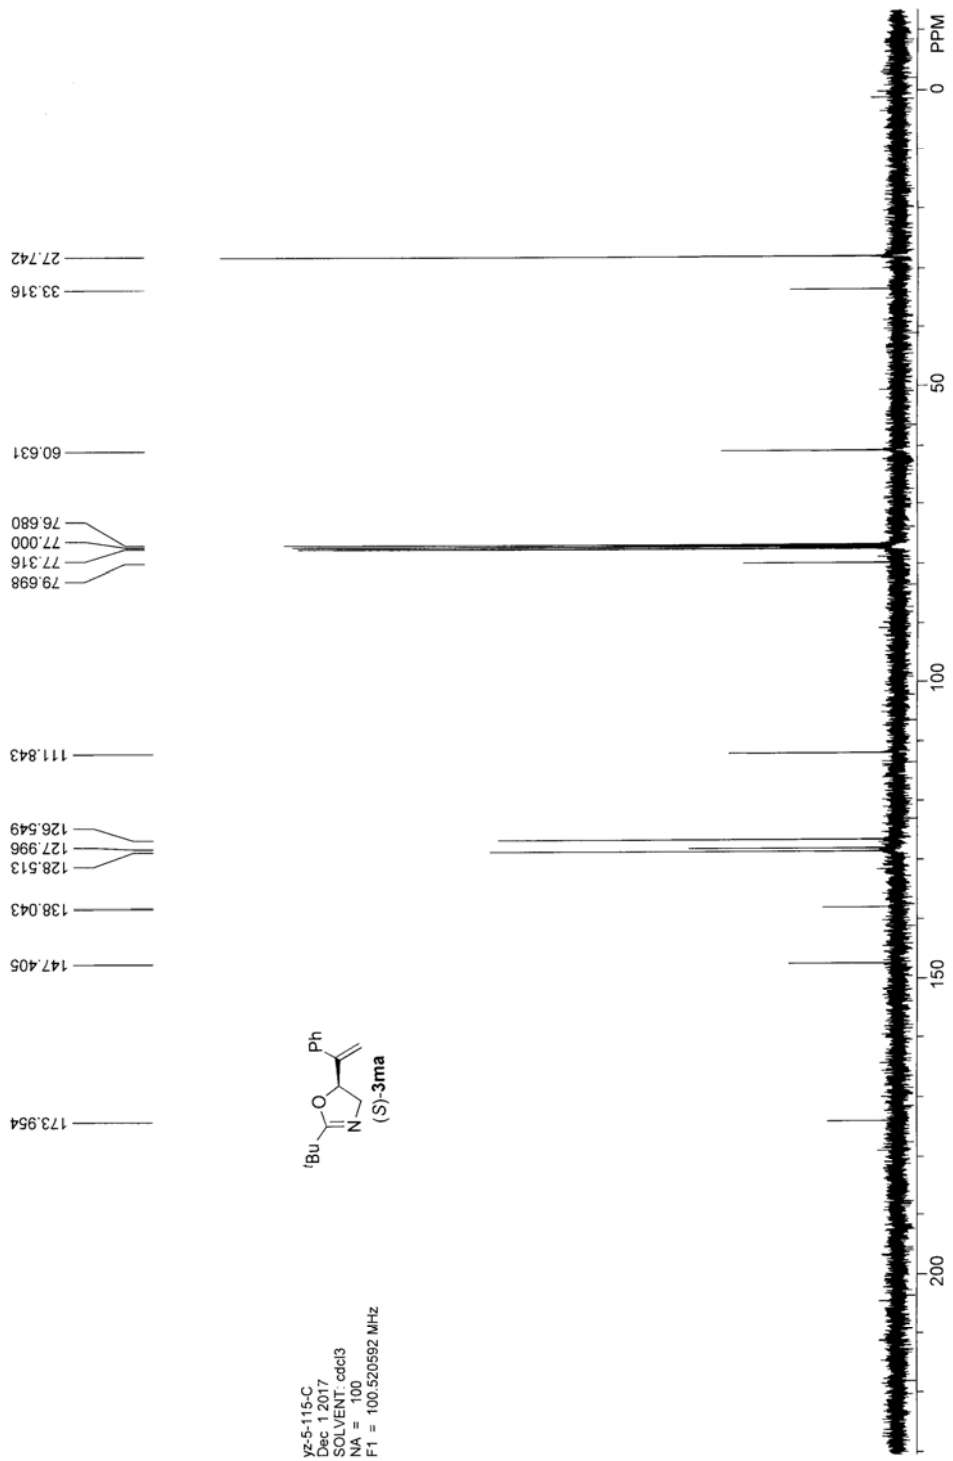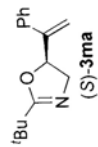

YZ-5-115-C  
 Dec 1 2017  
 SOLVENT: cdcl3  
 NA = 100  
 F1 = 100.520592 MHz

**SAMPLE INFORMATION**

|                  |                          |                 |                         |
|------------------|--------------------------|-----------------|-------------------------|
| Sample Name      | yz-5-115-adh-100-1-1-214 | Acquired By:    | Breeze                  |
| Sample Type      | 标准                       | Date Acquired   | 2017/11/30 15:04:35 CST |
| Val:             | 999                      | Acq. Method     | zg1001                  |
| Injection #      | 91                       | Date Processed  | 2017/12/1 16:17:03 CST  |
| Injection Volume | 10.00 u                  | Channel Name    | W2489 ChA               |
| Run Time         | 25.00 Minutes            | Channel Desc.:  | W2489 ChA.214mm         |
| Column Type      |                          | Sample Set Name |                         |

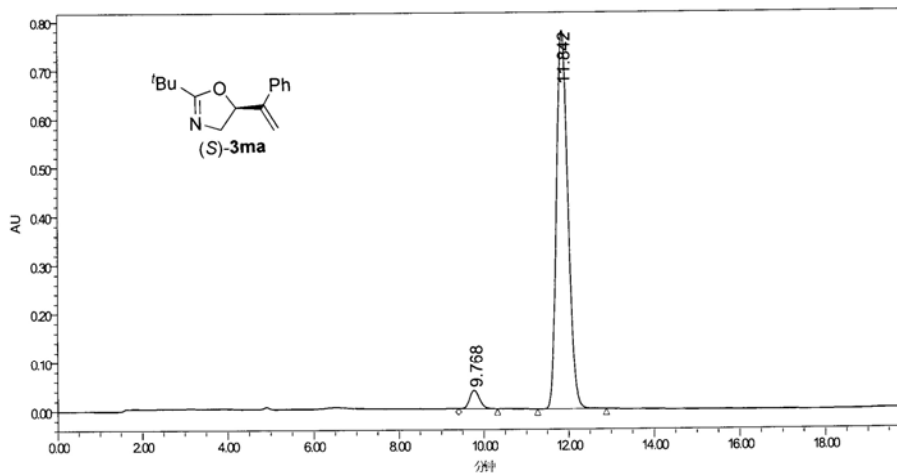

|   | RT (min) | Area (10 <sup>4</sup> sec) | %Area | Height (10 <sup>4</sup> ) | % Height |
|---|----------|----------------------------|-------|---------------------------|----------|
| 1 | 9.768    | 614788                     | 4.04  | 37688                     | 4.62     |
| 2 | 11.842   | 14587240                   | 95.96 | 778268                    | 95.38    |



**SAMPLE INFORMATION**

|                   |                          |                  |                         |
|-------------------|--------------------------|------------------|-------------------------|
| Sample Name:      | yz-5-123-edh-100-1-1-214 | Acquired By:     | Breeze                  |
| Sample Type:      | 未知                       | Date Acquired:   | 2017/11/30 15:25:07 CST |
| Val:              | 999                      | Acq. Method:     | zgj001                  |
| Injection#:       | 92                       | Date Processed:  | 2017/12/1 16:16:15 CST  |
| Injection Volume: | 10.00 uL                 | Channel Name:    | W2489 ChA               |
| Run Time:         | 25.00 Minutes            | Channel Desc.:   | W2489 ChA.214mm         |
| Column Type:      |                          | Sample Set Name: |                         |

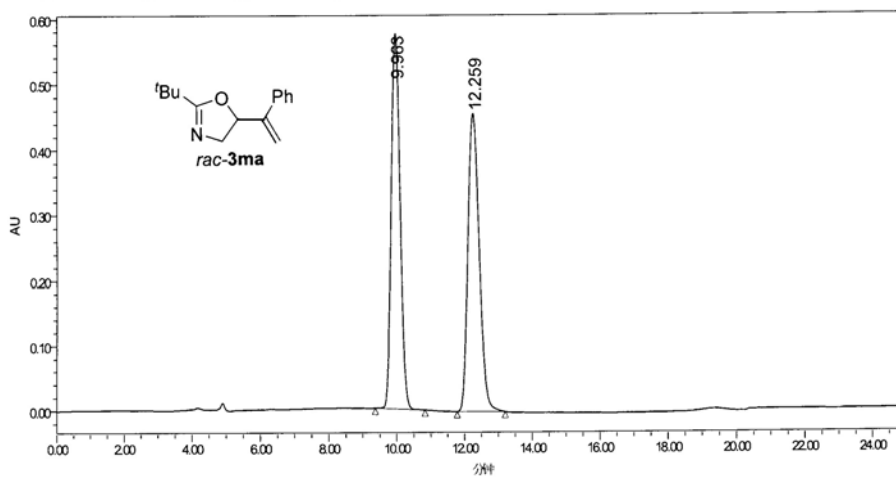

|   | RT (min) | Area (#sec) | %Area | Height (#) | % Height |
|---|----------|-------------|-------|------------|----------|
| 1 | 9.963    | 10609472    | 49.68 | 574233     | 55.68    |
| 2 | 12.259   | 10643546    | 50.32 | 456918     | 44.31    |

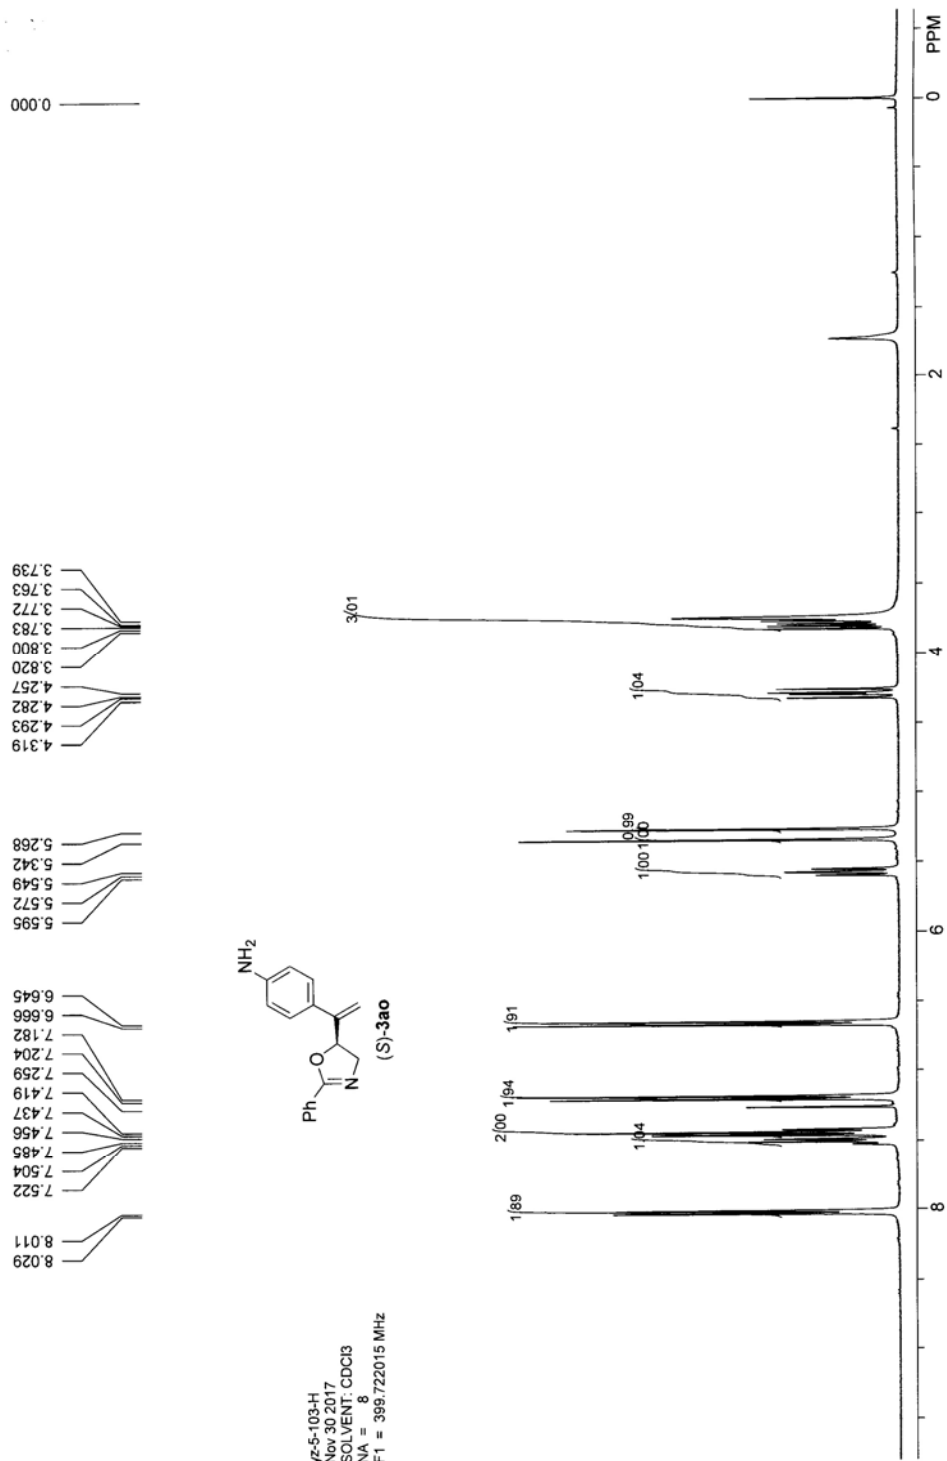

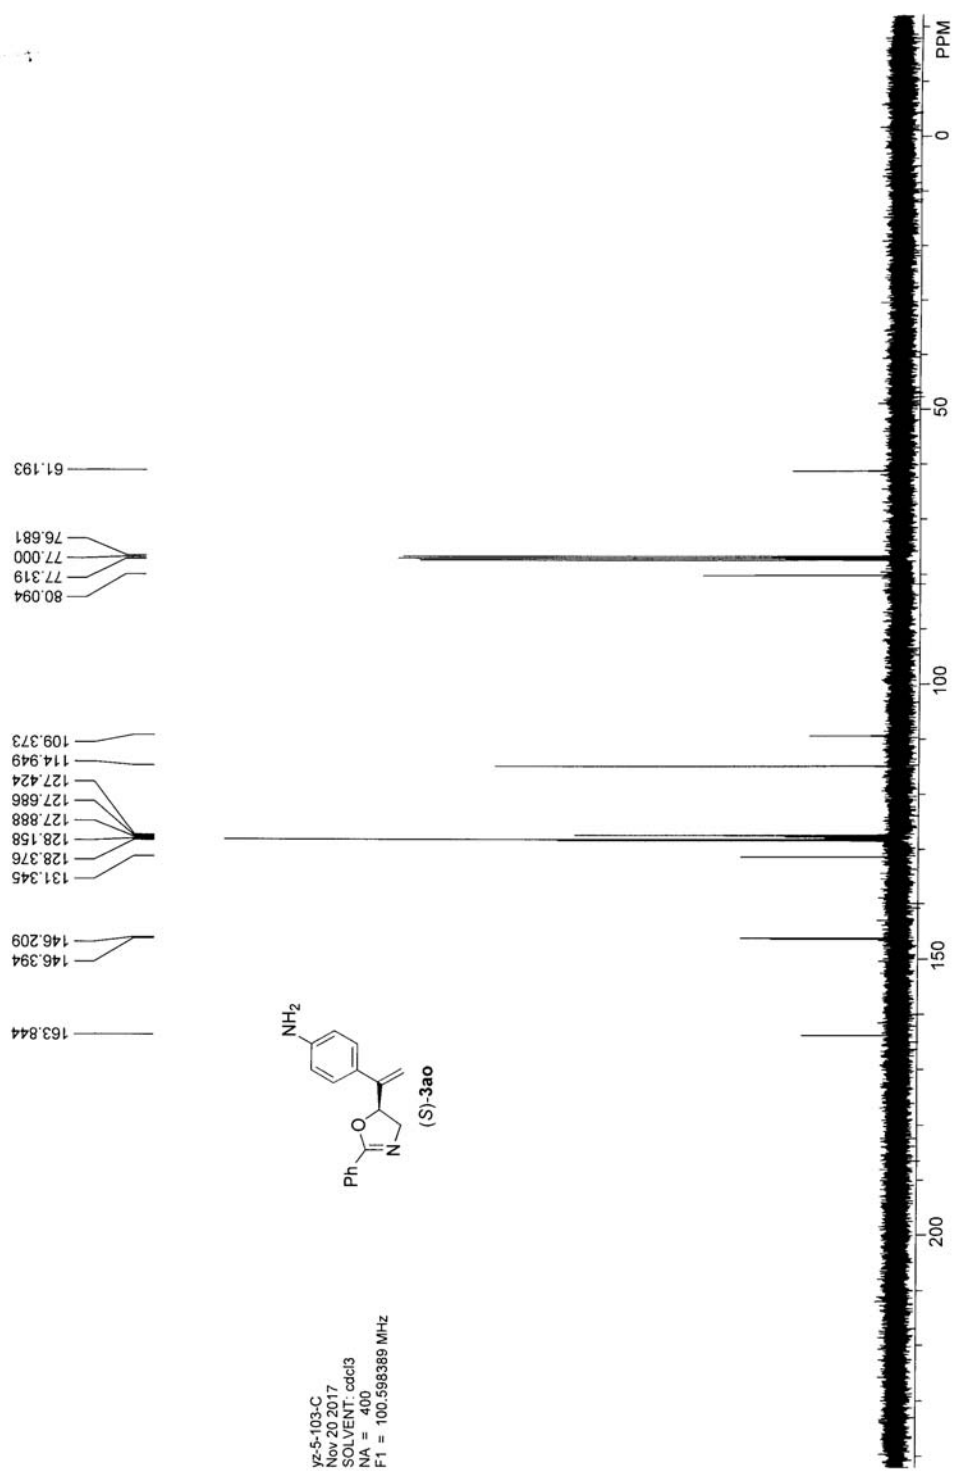

# yz-5-103-as-h-90-10-1-214

实验时间: 2017-11-24, 12:55:18  
谱图文件: D:\zhuguangjiong\yz\20171123\yz-5-103-AS-H-90-10-1-214. org

报告时间: 2017-11-24, 19:05:11

实验内容简介:

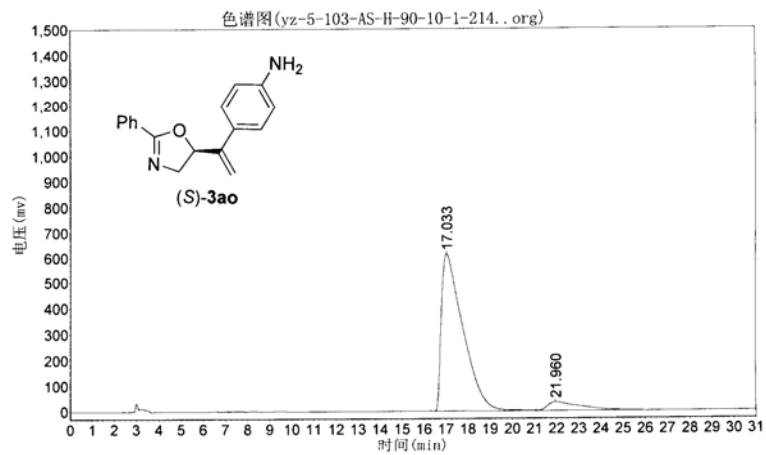

分析结果表

| 峰号 | 峰名 | 保留时间   | 峰高         | 峰面积          | 含量       |
|----|----|--------|------------|--------------|----------|
| 1  |    | 17.033 | 614375.188 | 41527680.000 | 92.6101  |
| 2  |    | 21.960 | 33489.531  | 3313727.500  | 7.3899   |
| 总计 |    |        | 647864.719 | 44841407.500 | 100.0000 |

# yz-5-112-as-h-90-10-1-214

实验时间: 2017-11-24, 11:45:54  
谱图文件: D:\zhuguangjiong\yz\20171123\yz-5-112-AS-H-90-10-1-214.org

报告时间: 2017-11-24, 19:04:20

实验内容简介:

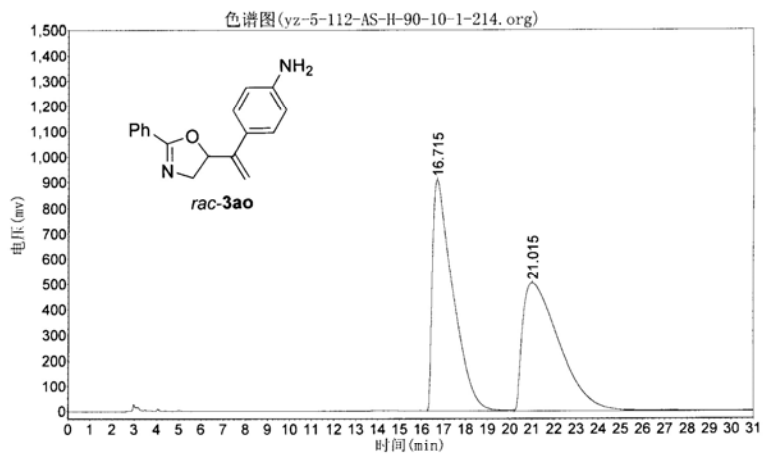

分析结果表

| 峰号 | 峰名 | 保留时间   | 峰高          | 峰面积           | 含量       |
|----|----|--------|-------------|---------------|----------|
| 1  |    | 16.715 | 908055.938  | 58841112.000  | 50.2756  |
| 2  |    | 21.015 | 503830.813  | 58195948.000  | 49.7244  |
| 总计 |    |        | 1411886.750 | 117037060.000 | 100.0000 |

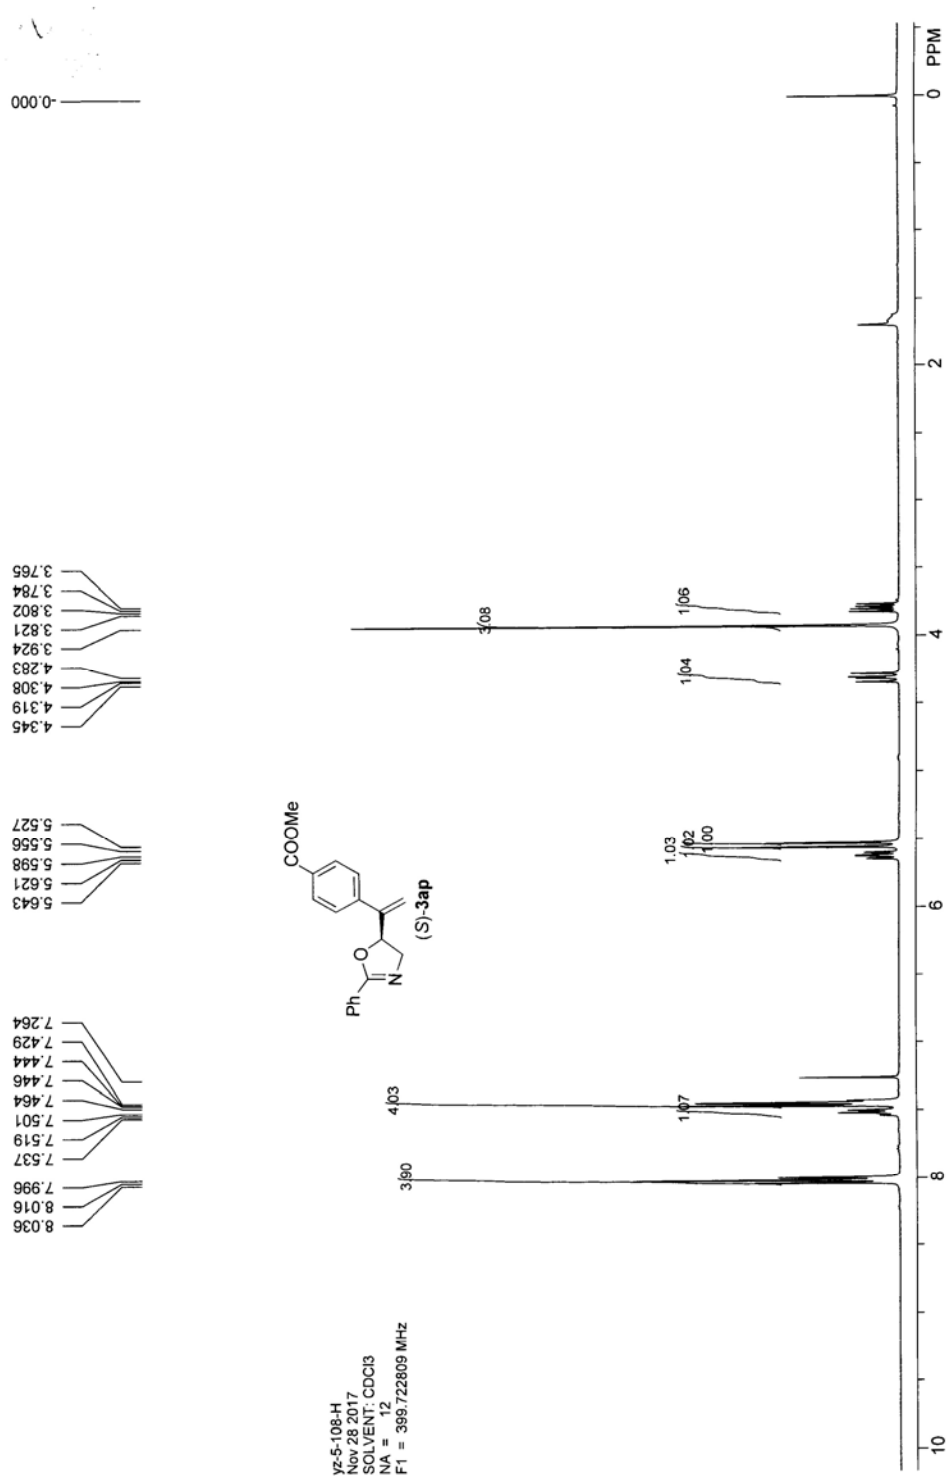

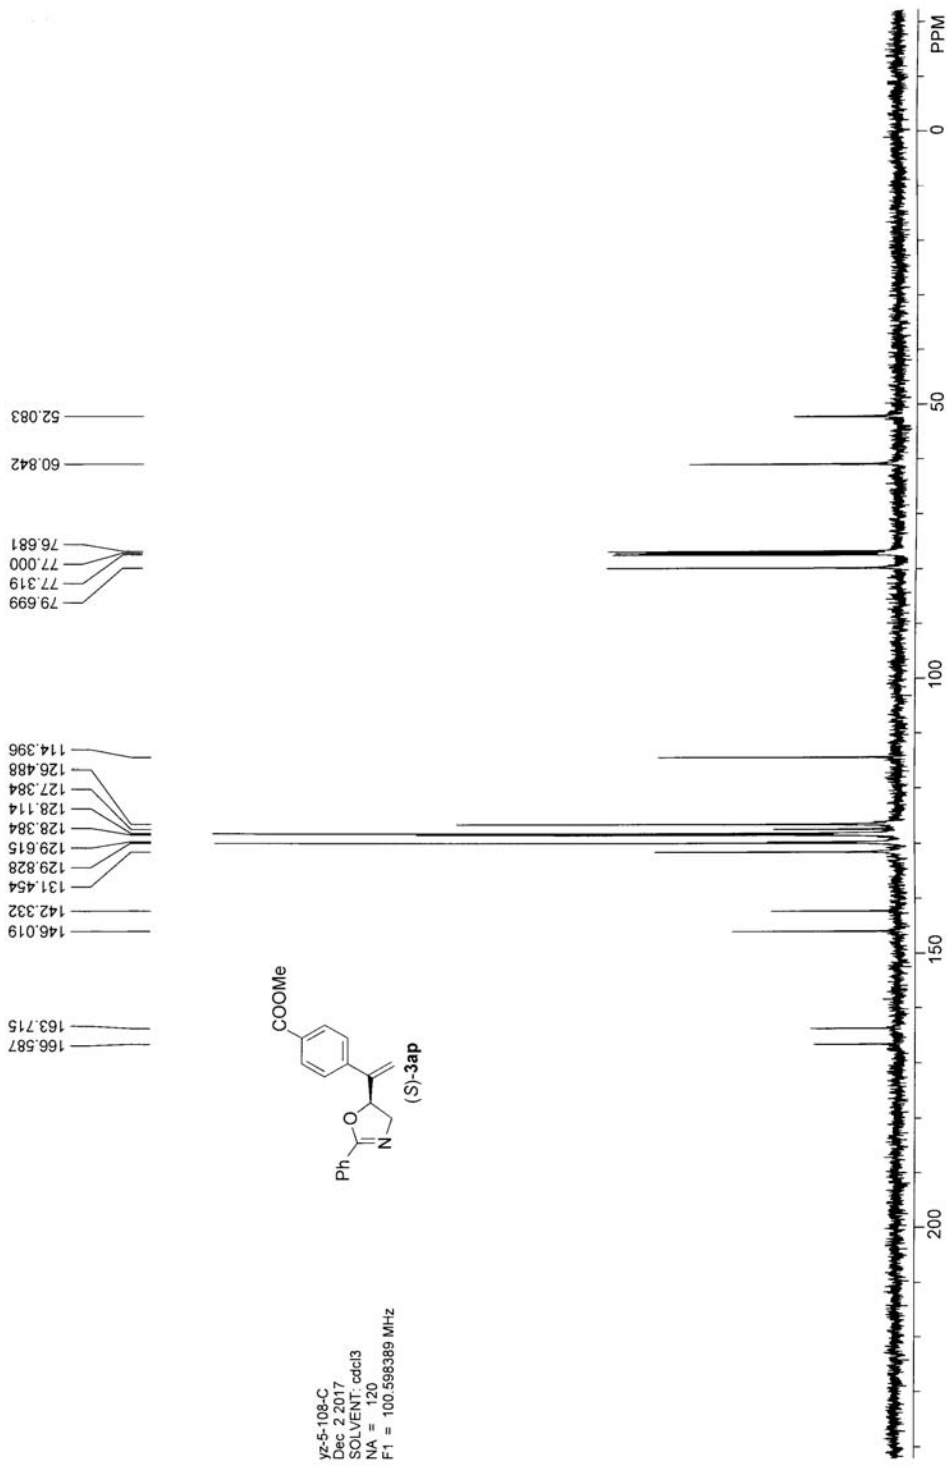

# yz-5-108-oj-h-95-5-1-214

实验时间: 2017-11-30, 9:36:27  
 谱图文件: D:\zhuguang.jiong\yz\20171129\yz-5-108-oj-h-95-5-1-214....org

报告时间: 2017-11-30, 14:18:54

实验内容简介:

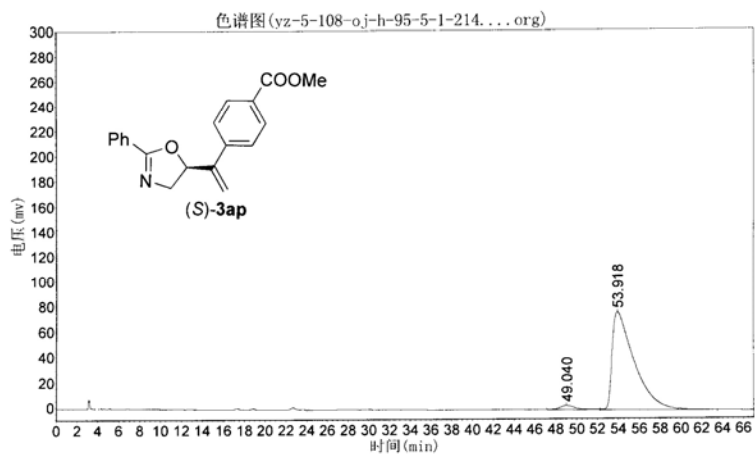

分析结果表

| 峰号 | 峰名 | 保留时间   | 峰高        | 峰面积          | 含量       |
|----|----|--------|-----------|--------------|----------|
| 1  |    | 49.040 | 3293.111  | 322342.250   | 2.7802   |
| 2  |    | 53.918 | 77049.086 | 11271889.000 | 97.2198  |
| 总计 |    |        | 80342.197 | 11594231.250 | 100.0000 |



# yz-5-113-oj-h-95-5-1-214

实验时间: 2017-11-30, 10:45:35  
谱图文件: D:\zhuguangjiong\yz\20171129\yz-5-113-oj-h-95-5-1-214....org

报告时间: 2017-11-30, 14:19:38

实验内容简介:

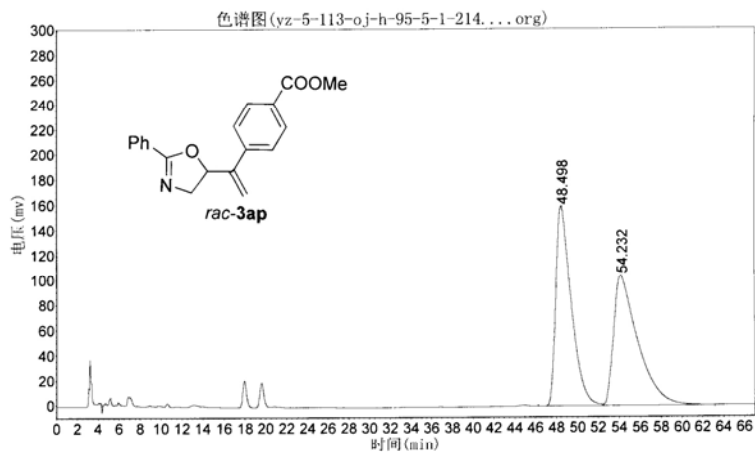

分析结果表

| 峰号 | 峰名 | 保留时间   | 峰高         | 峰面积          | 含量       |
|----|----|--------|------------|--------------|----------|
| 1  |    | 48.498 | 159271.984 | 16445641.000 | 49.7091  |
| 2  |    | 54.232 | 103260.820 | 16638109.000 | 50.2909  |
| 总计 |    |        | 262532.805 | 33083750.000 | 100.0000 |

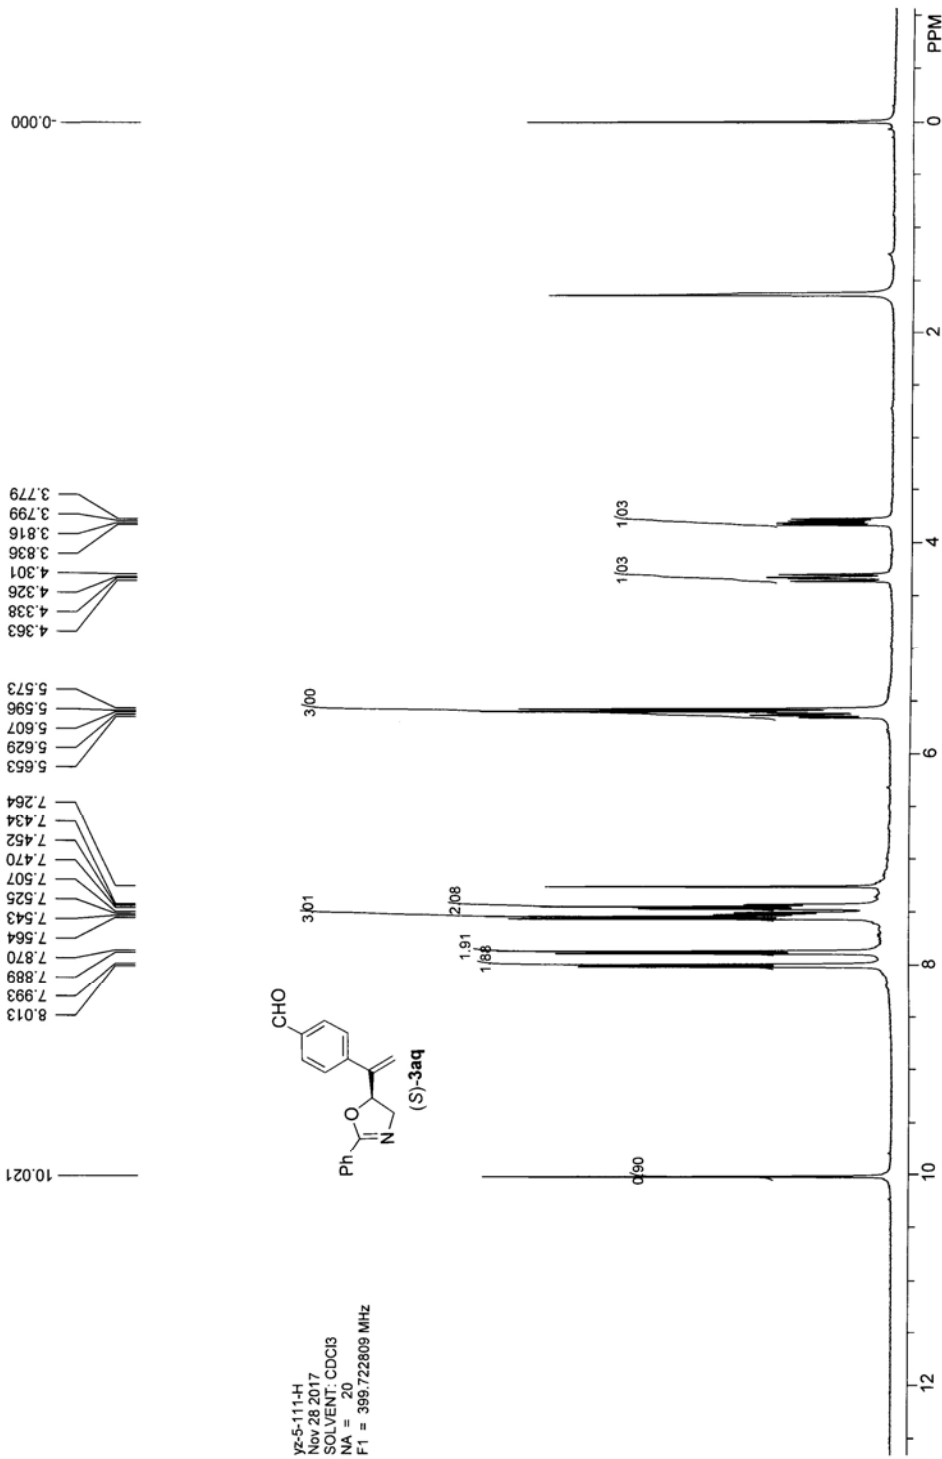

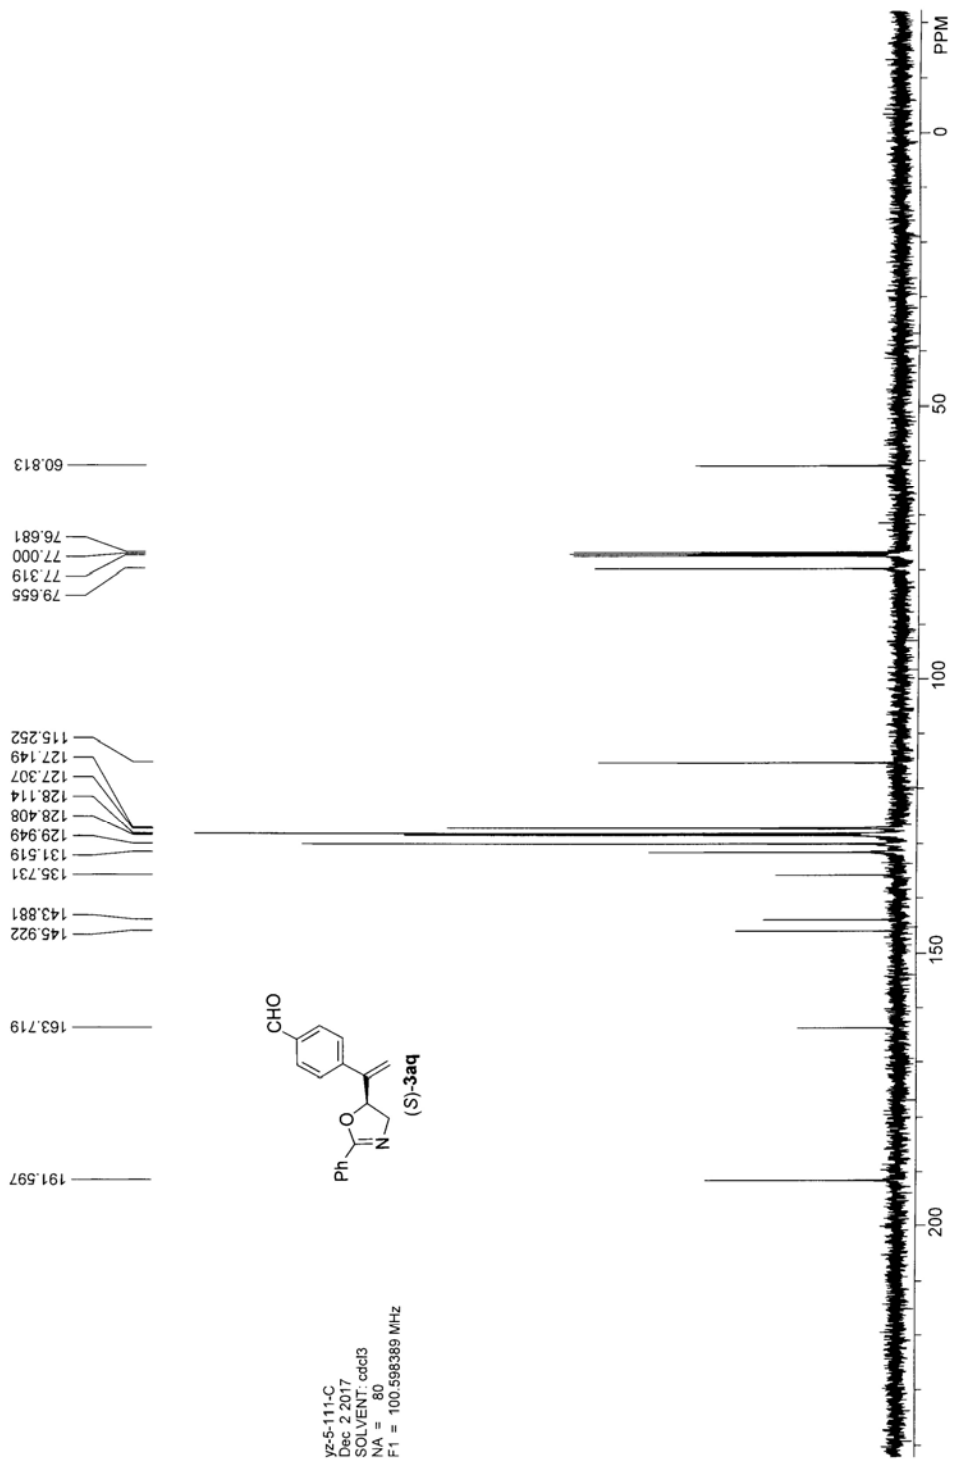

YZ-5-111-C  
 Dec 2 2017  
 SOLVENT: cdcl3  
 NA = 80  
 F1 = 100.598389 MHz

中国科学院上海有机化学研究所

Project Name: defaults for copy

Reported by User: Breeze user (Breeze)

Breeze 2  
HPLC System

### SAMPLE INFORMATION

|                   |                         |                  |                         |
|-------------------|-------------------------|------------------|-------------------------|
| Sample Name:      | yz-5-111-es-h-955-1-214 | Acquired By:     | Breeze                  |
| Sample Type:      | 未知                      | Date Acquired:   | 2017/11/30 18:18:44 CST |
| Vol:              | 999                     | Acq. Method:     | zg95                    |
| Injection #:      | 96                      | Date Processed:  | 2017/12/1 16:15:10 CST  |
| Injection Volume: | 10.00 $\mu$ l           | Channel Name:    | V2489 ChA               |
| Run Time:         | 200.00 Minutes          | Channel Desc.:   | V2489 ChA.214mm         |
| Column Type:      |                         | Sample Set Name: |                         |

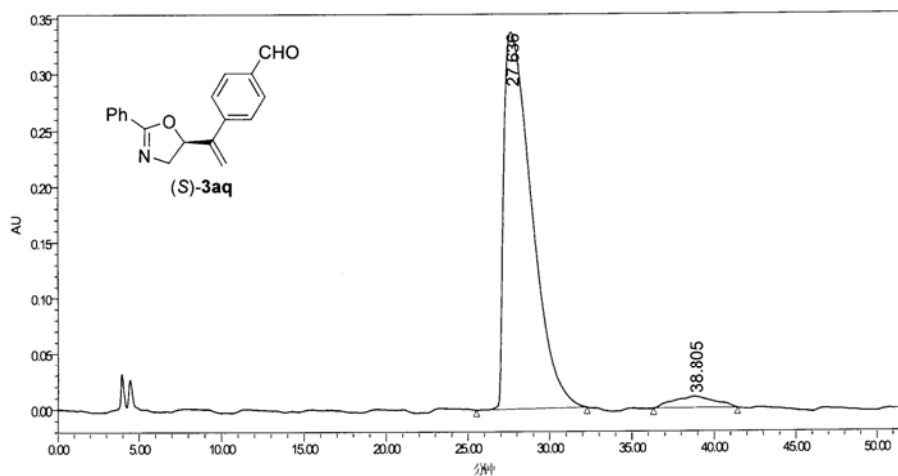

|   | RT (min) | Area (intensity) | %Area | Height (intensity) | % Height |
|---|----------|------------------|-------|--------------------|----------|
| 1 | 27.636   | 39965221         | 95.78 | 336447             | 97.11    |
| 2 | 38.805   | 1757030          | 4.22  | 10036              | 2.89     |

Report Method: Individual Report ASC

Page: 1 (共计 1)

Printed: 2017/12/1

16:17:46 PRC

**SAMPLE INFORMATION**

|                   |                          |                  |                         |
|-------------------|--------------------------|------------------|-------------------------|
| Sample Name:      | yz-5-119-as-h-95-5-1-214 | Acquired By:     | Breeze                  |
| Sample Type:      | 未知                       | Date Acquired:   | 2017/11/30 17:24:13 CST |
| Vial:             | 999                      | Acq. Method:     | zg95                    |
| Injection #:      | 95                       | Date Processed:  | 2017/12/1 16:15:35 CST  |
| Injection Volume: | 10.00 $\mu$ l            | Channel Name:    | W2489 ChA               |
| Run Time:         | 200.00 Minutes           | Channel Desc.:   | W2489 ChA.214nm         |
| Column Type:      |                          | Sample Set Name: |                         |

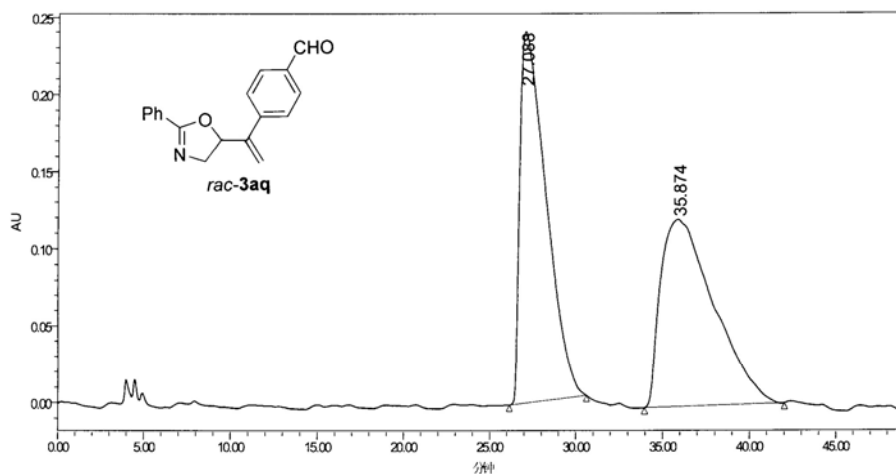

|   | RT (min) | Area (AU*sec) | %Area | Height (AU) | % Height |
|---|----------|---------------|-------|-------------|----------|
| 1 | 27.088   | 25514039      | 49.6% | 240510      | 66.4%    |
| 2 | 35.874   | 25873140      | 50.3% | 121430      | 33.5%    |

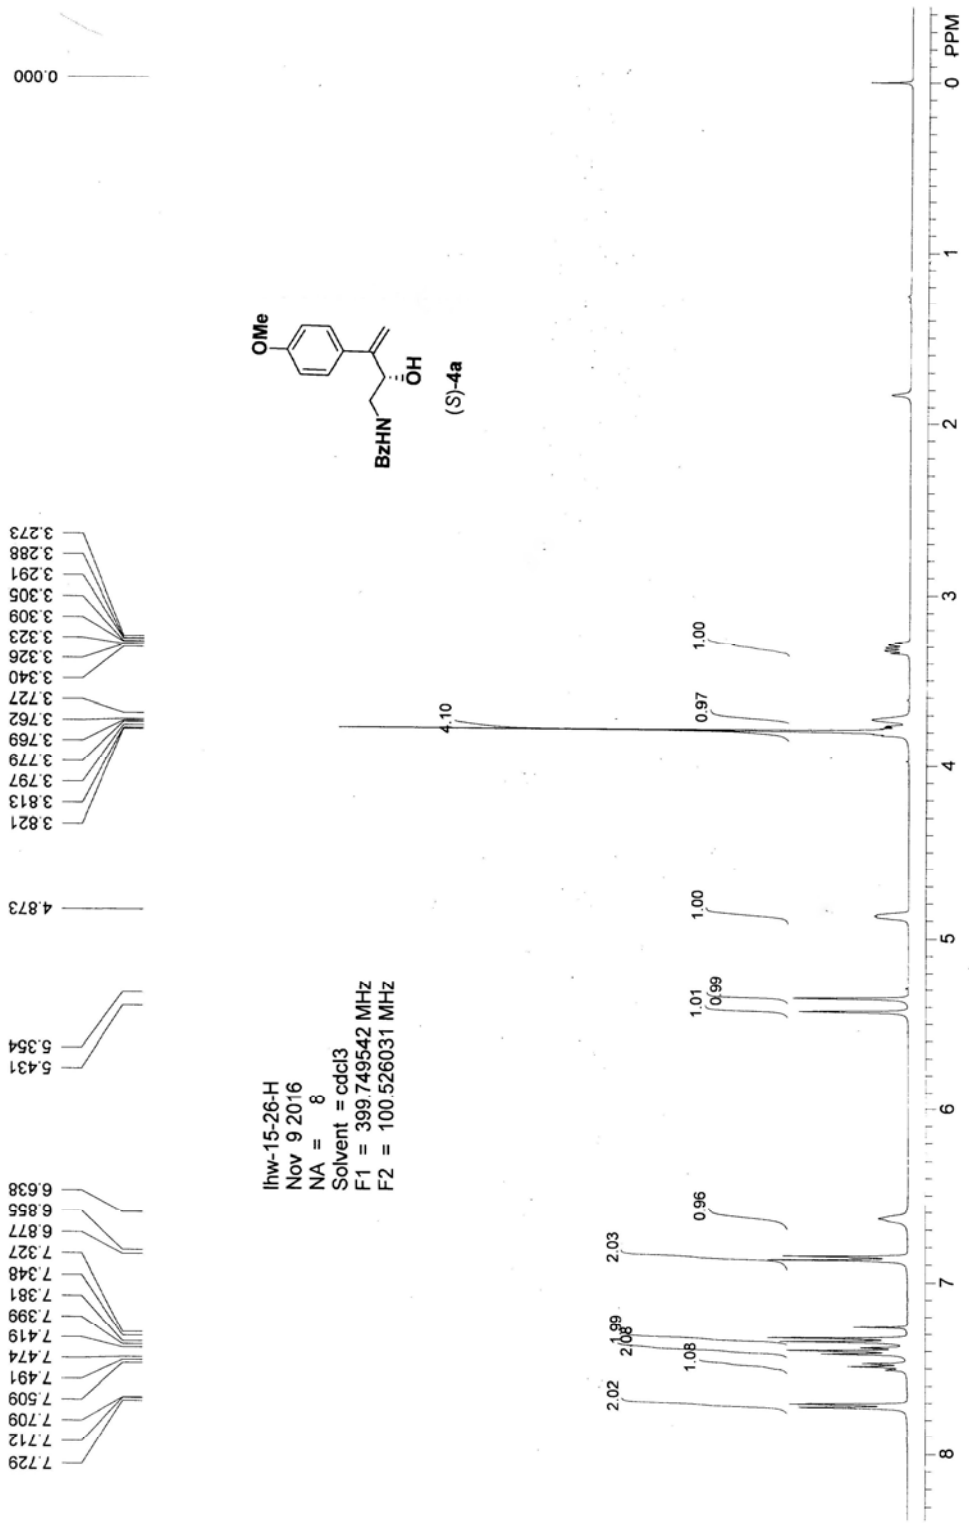

lhw-15-26-C  
Nov 9 2016  
NA = 1000  
Solvent = cdcl3  
F1 = 100.527557 MHz  
F2 = 399.749146 MHz

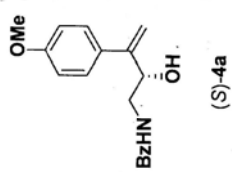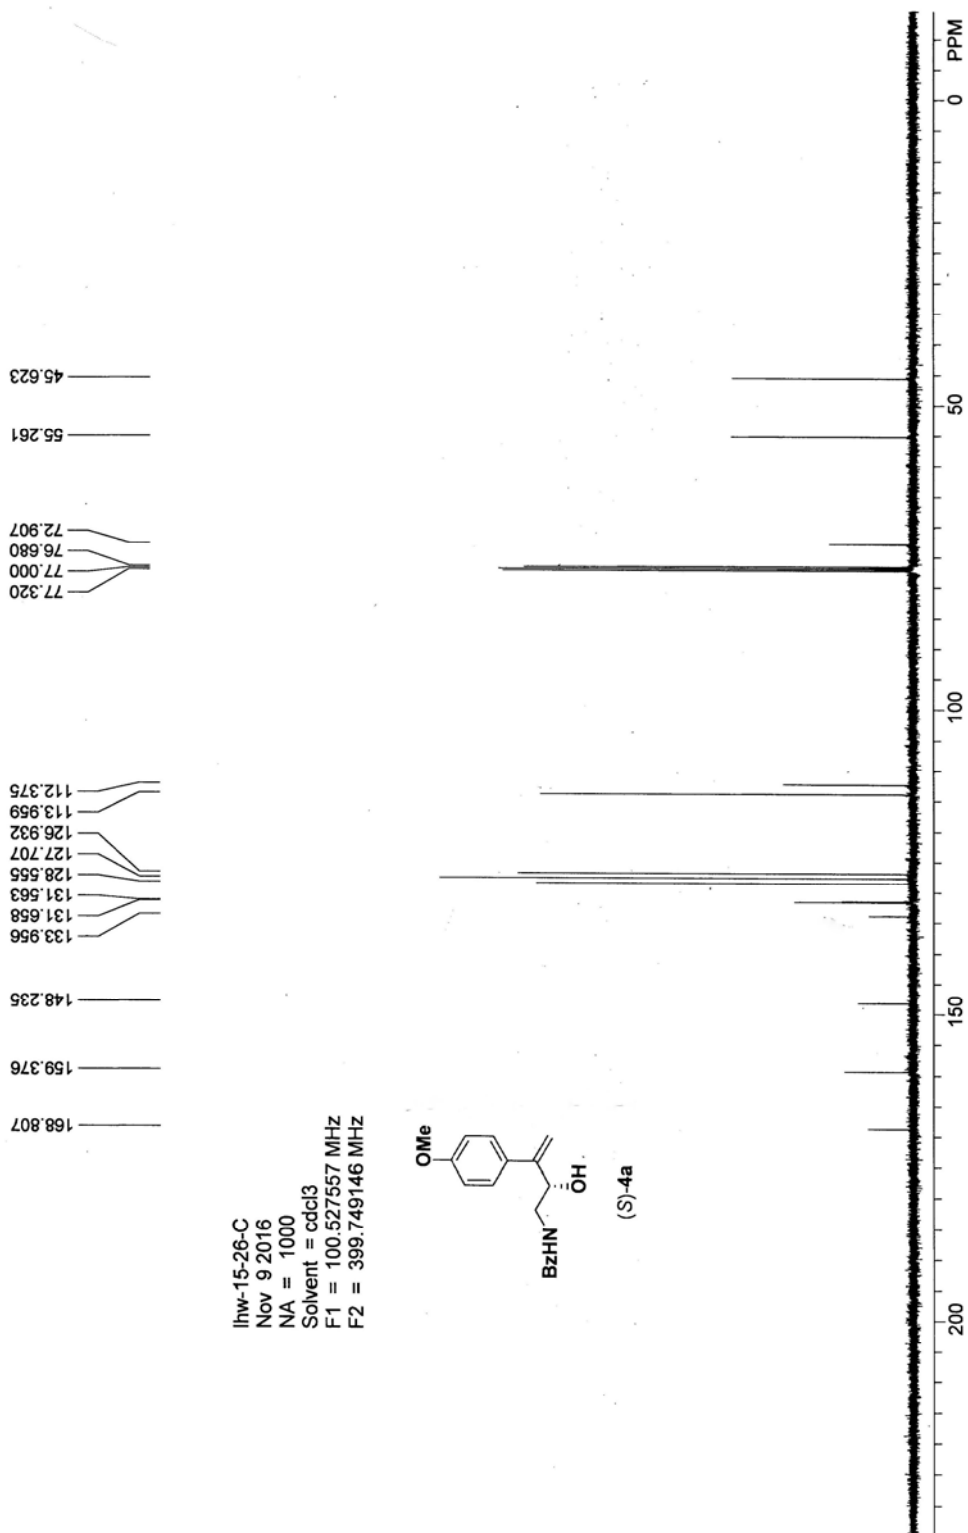

# lhw-15-26-od-h-80-20-1-214

实验时间: 2016-11-09, 14:29:29

报告时间: 2016-11-09, 15:24:46

谱图文件: D:\zhuguangji\lh\20161109\lh-15-26-od-h-80-20-1-214.org

实验内容简介:

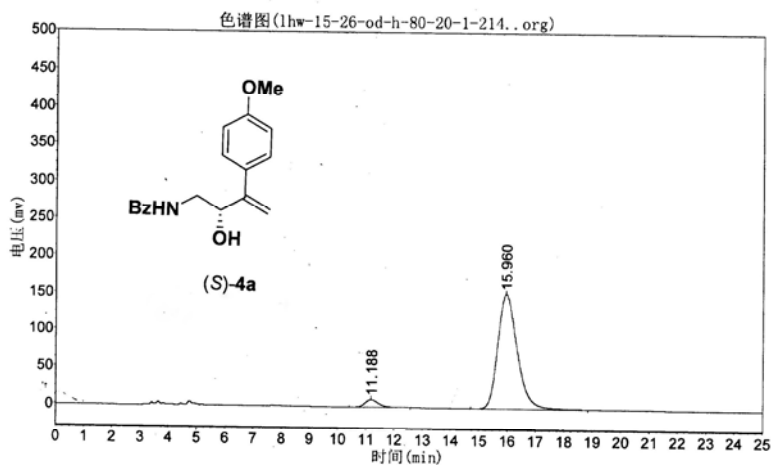

分析结果表

| 峰号 | 峰名 | 保留时间   | 峰高         | 峰面积         | 含量       |
|----|----|--------|------------|-------------|----------|
| 1  |    | 11.188 | 10292.053  | 340667.031  | 4.4610   |
| 2  |    | 15.960 | 154216.375 | 7295846.000 | 95.5390  |
| 总计 |    |        | 164508.428 | 7636513.031 | 100.0000 |



# lhw-15-26-rac-od-h-80-20-1-214

实验时间: 2016-11-09, 14:55:13

报告时间: 2016-11-09, 15:23:56

谱图文件: D:\zhuguangjiong\lh\20161109\lh-15-26-rac-od-h-80-20-1-214.org

实验内容简介:

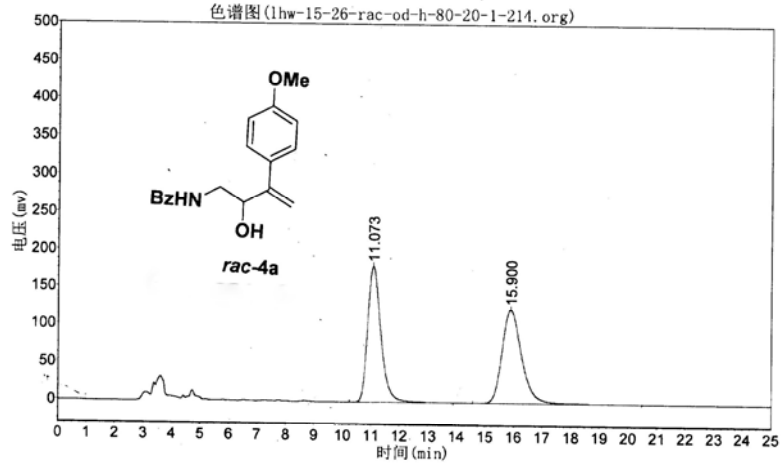

分析结果表

| 峰号 | 峰名 | 保留时间   | 峰高         | 峰面积          | 含量       |
|----|----|--------|------------|--------------|----------|
| 1  |    | 11.073 | 180476.375 | 5830138.500  | 49.7798  |
| 2  |    | 15.900 | 123526.859 | 5881722.500  | 50.2202  |
| 总计 |    |        | 304003.234 | 11711861.000 | 100.0000 |

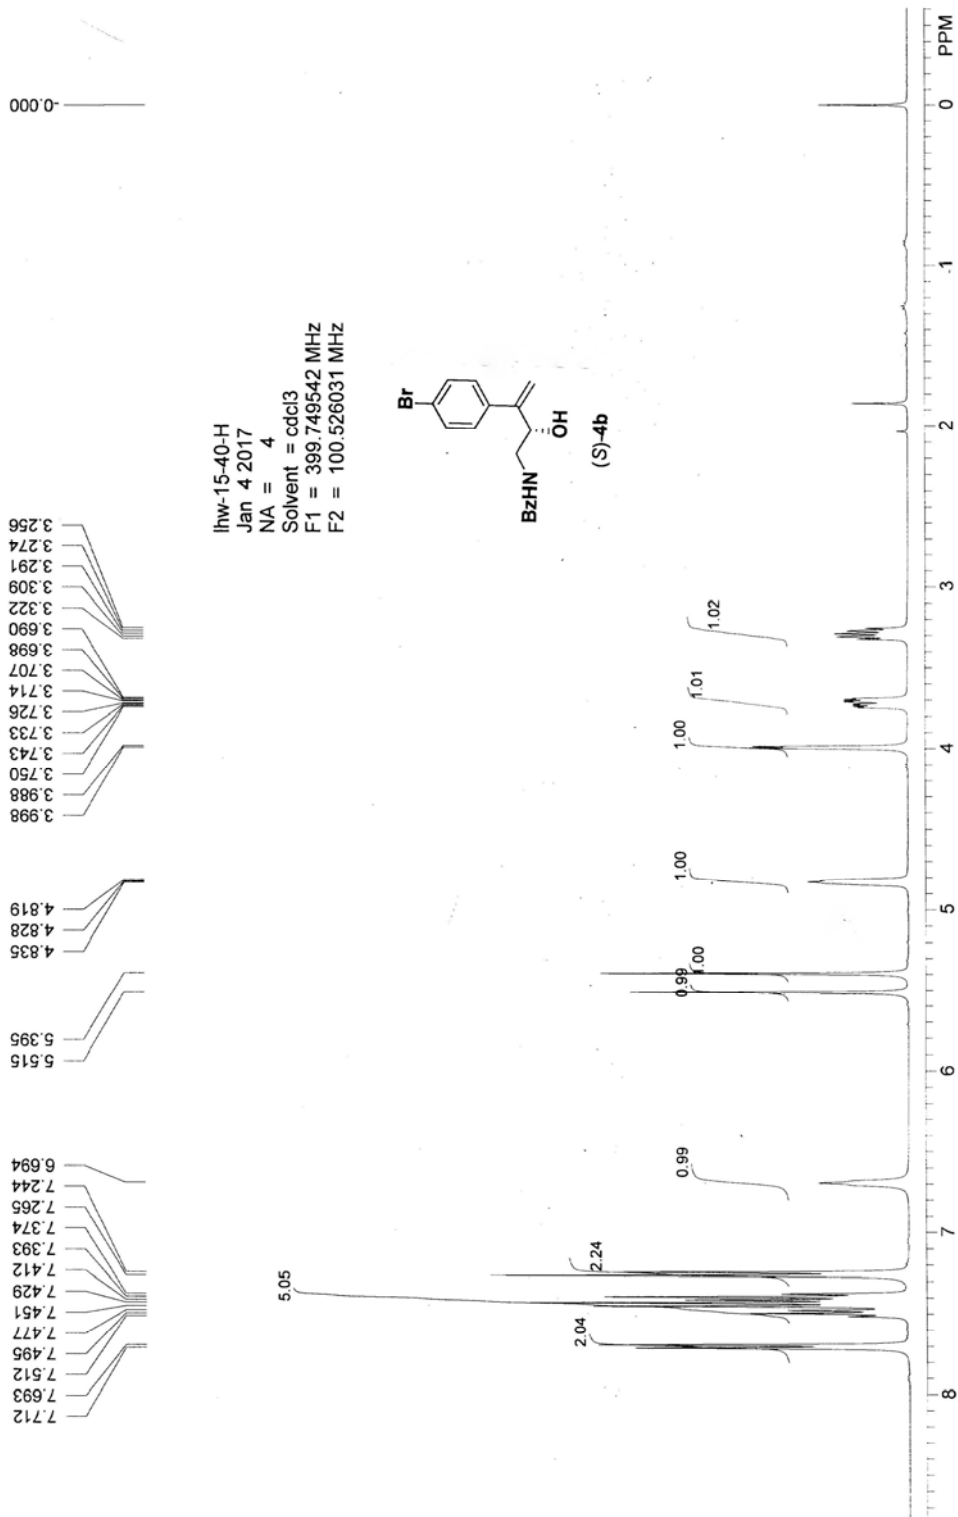

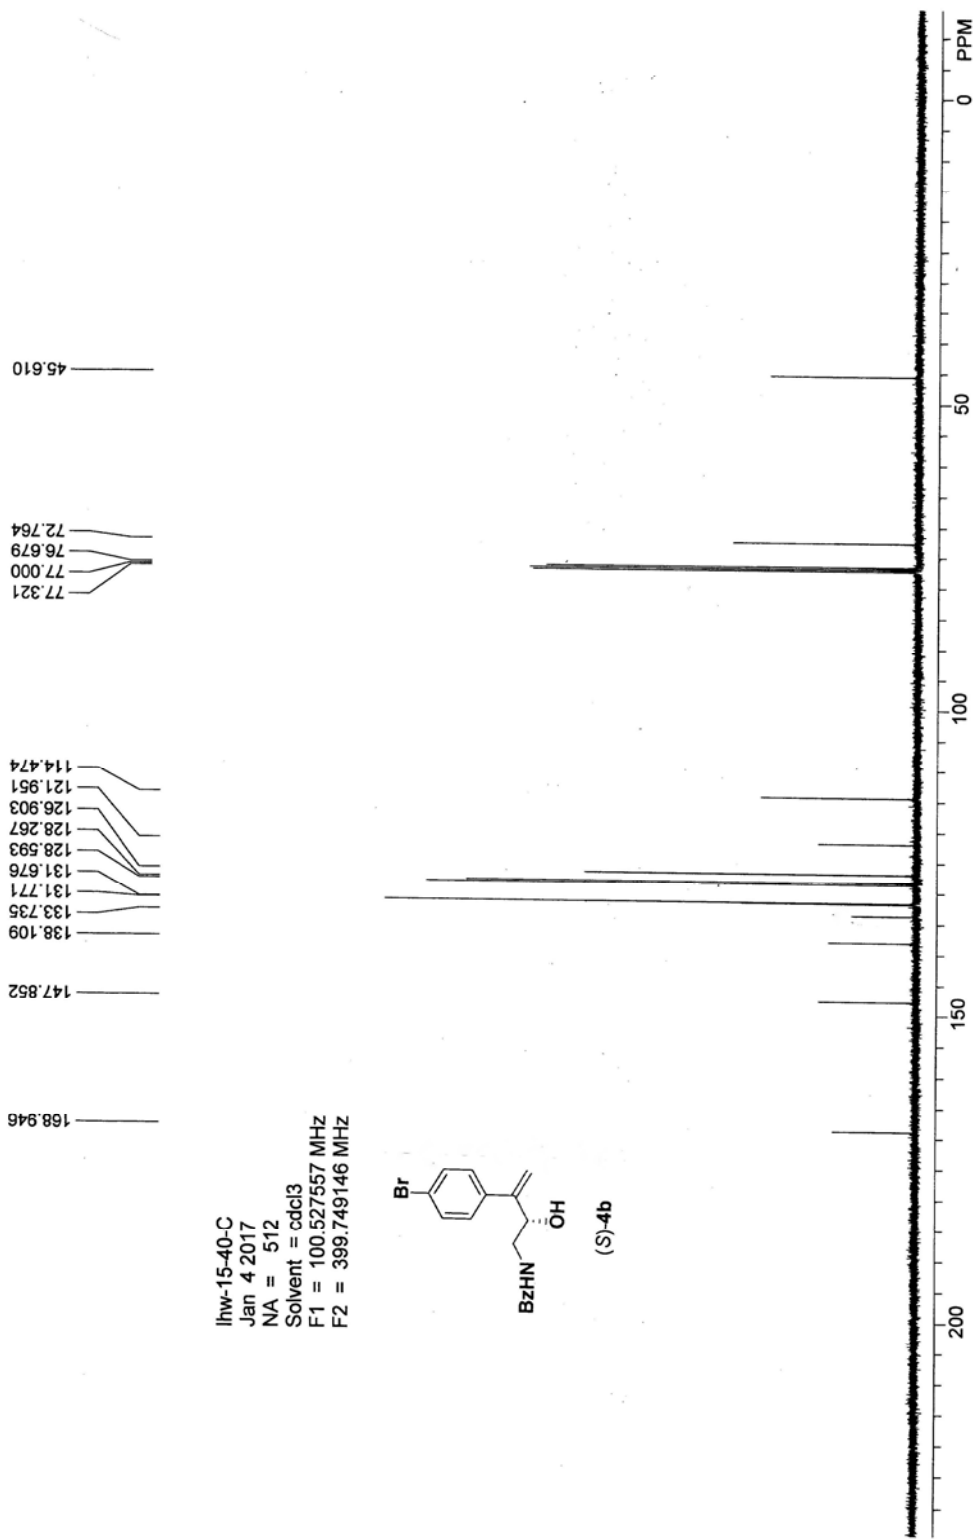

Ihw-15-40-C  
 Jan 4 2017  
 NA = 512  
 Solvent = cdcl3  
 F1 = 100.527557 MHz  
 F2 = 399.749146 MHz

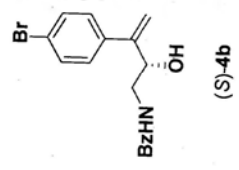

# 1hw-15-40-od-h-80-20-1-214

实验时间: 2016-12-30, 13:59:22

报告时间: 2016-12-30, 18:01:36

谱图文件: F:\zhuguangjiong\1hw\20161230\1hw-15-40-od-h-80-20-1-214.org

实验内容简介:

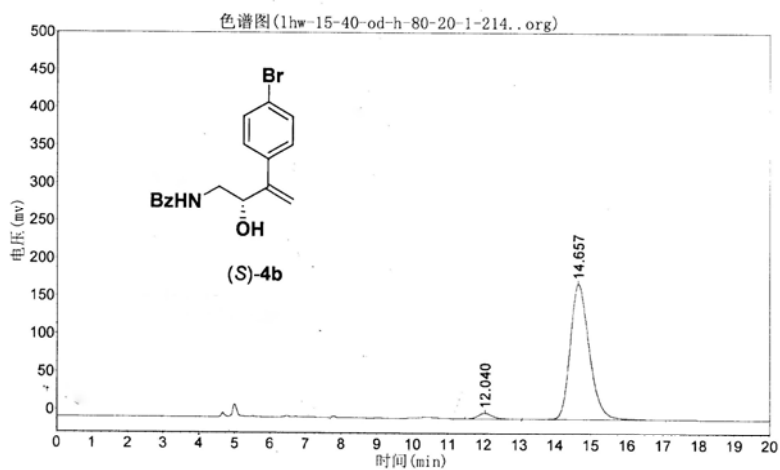

分析结果表

| 峰号 | 峰名 | 保留时间   | 峰高         | 峰面积         | 含量       |
|----|----|--------|------------|-------------|----------|
| 1  |    | 12.040 | 7751.575   | 220743.609  | 3.2162   |
| 2  |    | 14.657 | 178547.641 | 6642765.000 | 96.7838  |
| 总计 |    |        | 186299.216 | 6863508.609 | 100.0000 |

# 1hw-15-40-rac-od-h-80-20-1-214

实验时间: 2016-12-30, 13:04:15

报告时间: 2016-12-30, 17:59:43

谱图文件: F:\zhuguangjiong\1hw\20161230\1hw-15-40-rac-od-h-80-20-1-214.org

实验内容简介:

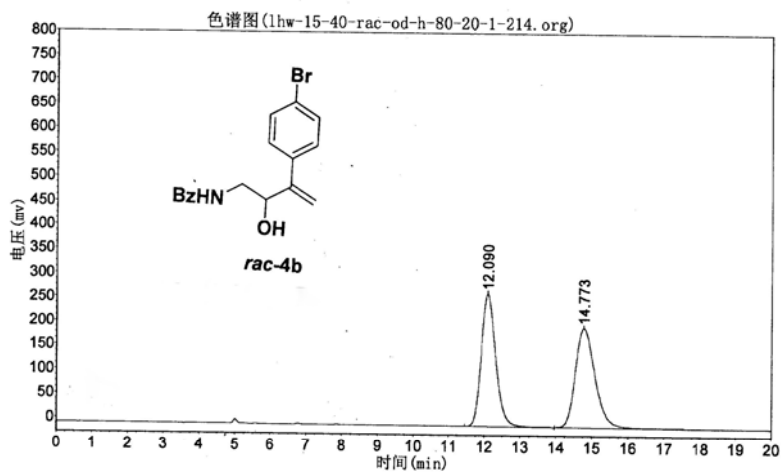

分析结果表

| 峰号 | 峰名 | 保留时间   | 峰高         | 峰面积          | 含量       |
|----|----|--------|------------|--------------|----------|
| 1  |    | 12.090 | 273304.844 | 7748812.000  | 49.7928  |
| 2  |    | 14.773 | 203963.750 | 7813300.500  | 50.2072  |
| 总计 |    |        | 477268.594 | 15562112.500 | 100.0000 |

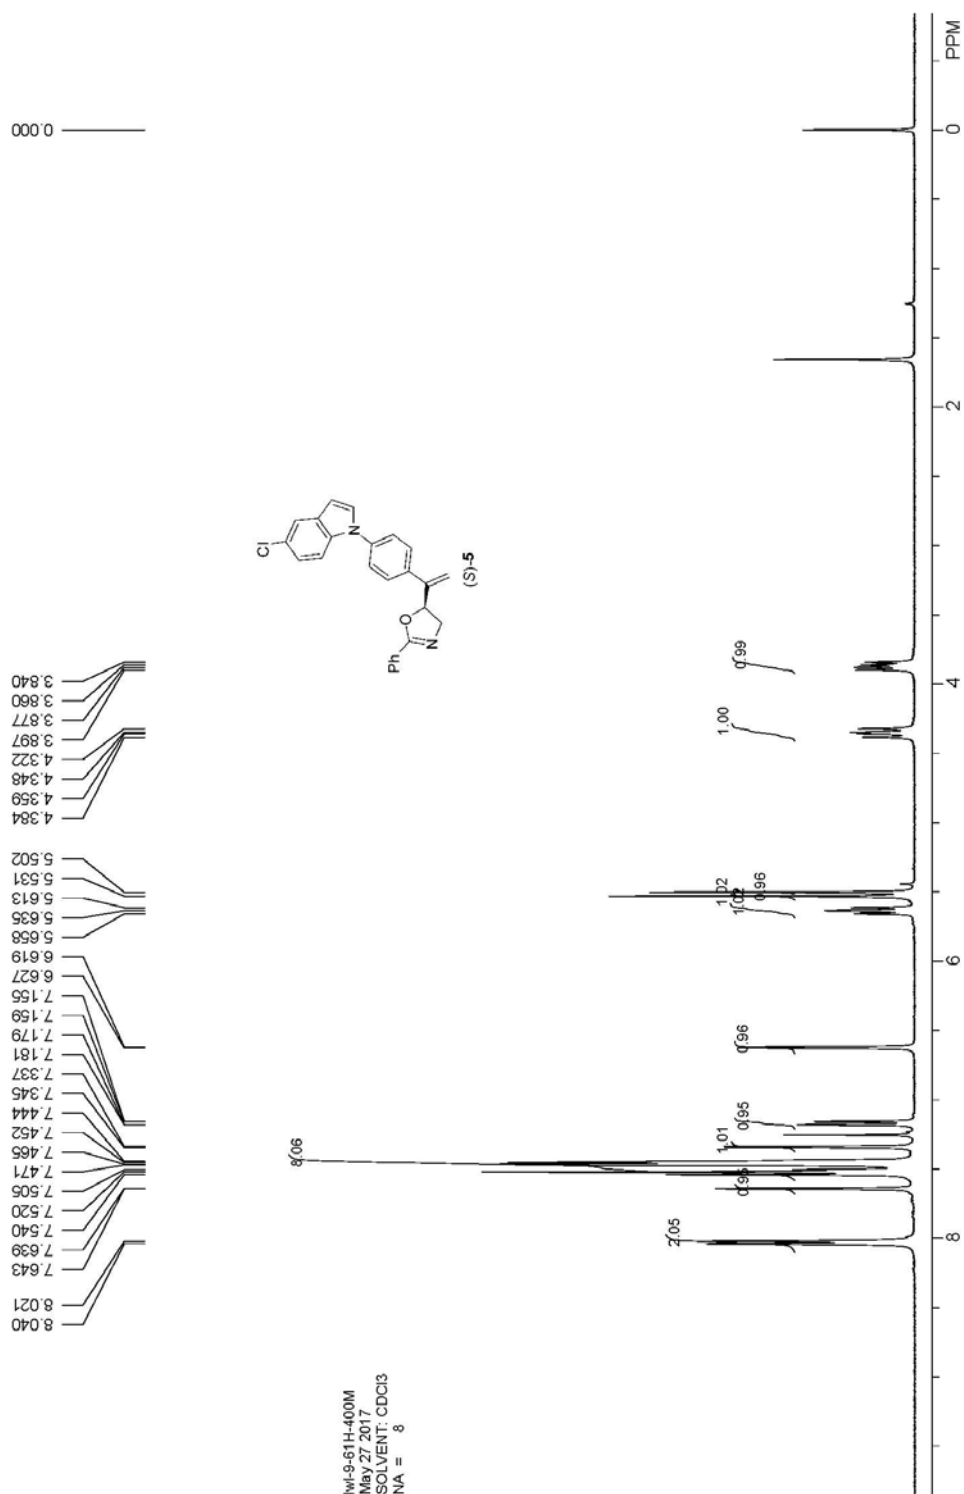

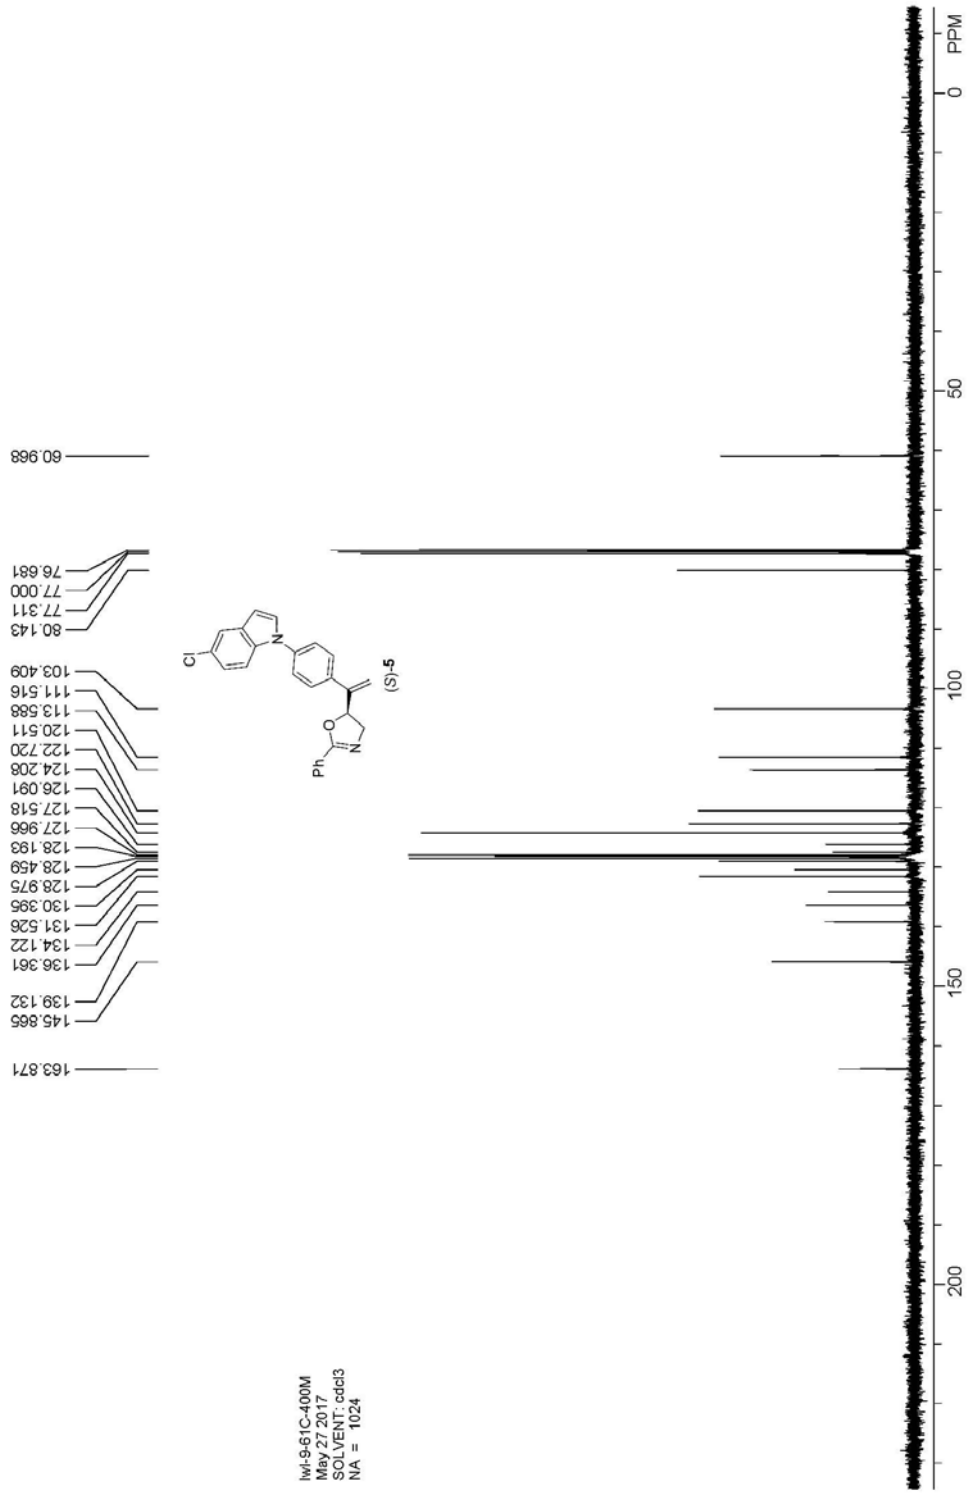

**1769 LWL-9-61DCM IE3 91DEA0.1 254 0.7**

|                  |                                  |                   |          |
|------------------|----------------------------------|-------------------|----------|
| Sample Name:     | LWL-9-61DCM IE3 91DEA0.1 254 0.7 | Injection Volume: | 3.0      |
| Vial Number:     | RE4                              | Channel:          | UV_VIS_1 |
| Sample Type:     | unknown                          | Wavelength:       | 254      |
| Control Program: | 201701-1                         | Bandwidth:        | n.a.     |
| Quantif. Method: | 201701                           | Dilution Factor:  | 1.0000   |
| Recording Time:  | 2017/5/24 19:38                  | Sample Weight:    | 1.0000   |
| Run Time (min):  | 30.00                            | Sample Amount:    | 1.0000   |

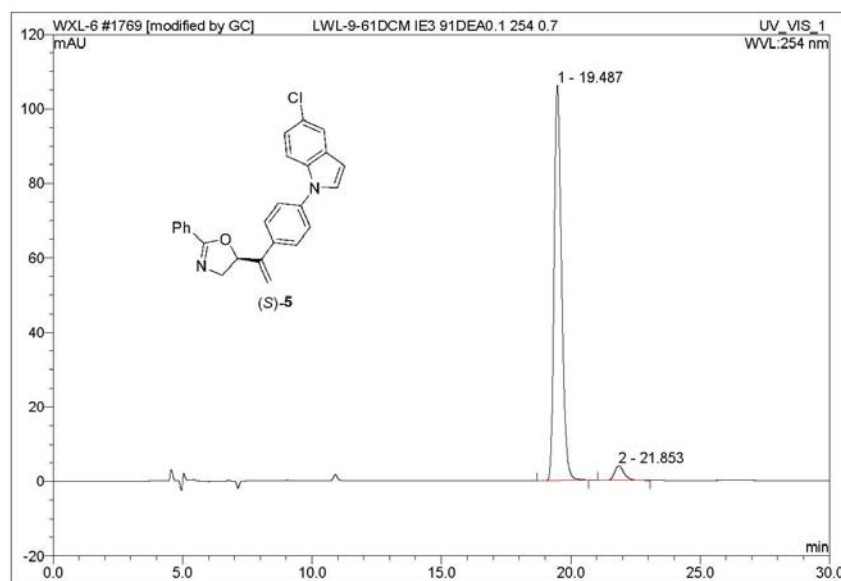

| No.           | Ret.Time<br>min | Peak Name | Height<br>mAU | Area<br>mAU*min | Rel.Area<br>% | Amount | Type |
|---------------|-----------------|-----------|---------------|-----------------|---------------|--------|------|
| 1             | 19.49           | n.a.      | 106.050       | 35.059          | 95.49         | n.a.   | BMB* |
| 2             | 21.85           | n.a.      | 3.839         | 1.655           | 4.51          | n.a.   | BMB* |
| <b>Total:</b> |                 |           | 109.889       | 36.714          | 100.00        | 0.000  |      |



**1766 LWL-9-37+-DCM IE3 91DEA0.1 254 0.7**

|                  |                                    |                   |          |
|------------------|------------------------------------|-------------------|----------|
| Sample Name:     | LWL-9-37+-DCM IE3 91DEA0.1 254 0.7 | Injection Volume: | 3.0      |
| Vial Number:     | RE1                                | Channel:          | UV_VIS_1 |
| Sample Type:     | unknown                            | Wavelength:       | 254      |
| Control Program: | 201701-1                           | Bandwidth:        | n.a.     |
| Quantif. Method: | 201701                             | Dilution Factor:  | 1.0000   |
| Recording Time:  | 2017/5/24 18:04                    | Sample Weight:    | 1.0000   |
| Run Time (min):  | 30.00                              | Sample Amount:    | 1.0000   |

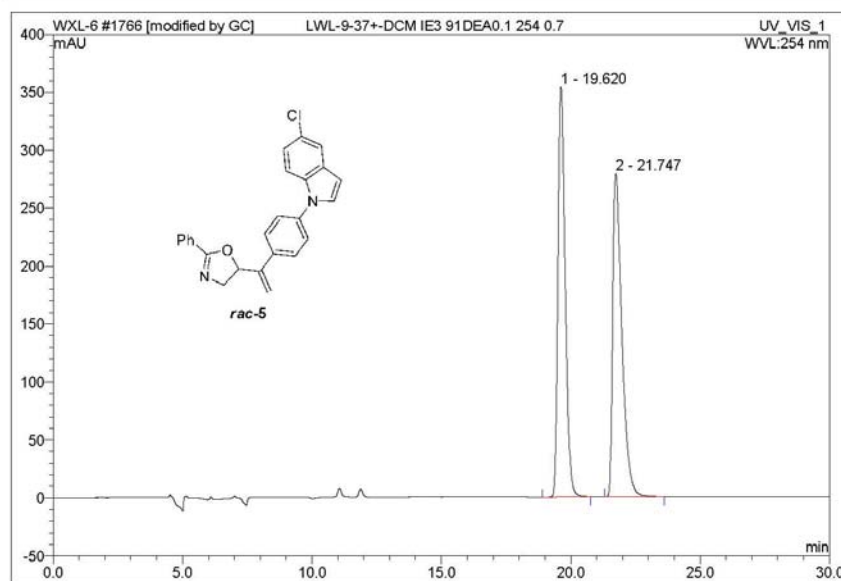

| No.           | Ret.Time<br>min | Peak Name | Height<br>mAU | Area<br>mAU*min | Rel.Area<br>% | Amount | Type |
|---------------|-----------------|-----------|---------------|-----------------|---------------|--------|------|
| 1             | 19.62           | n.a.      | 353.939       | 114.405         | 49.97         | n.a.   | BMB* |
| 2             | 21.75           | n.a.      | 279.219       | 114.521         | 50.03         | n.a.   | BMB  |
| <b>Total:</b> |                 |           | 633.158       | 228.926         | 100.00        | 0.000  |      |

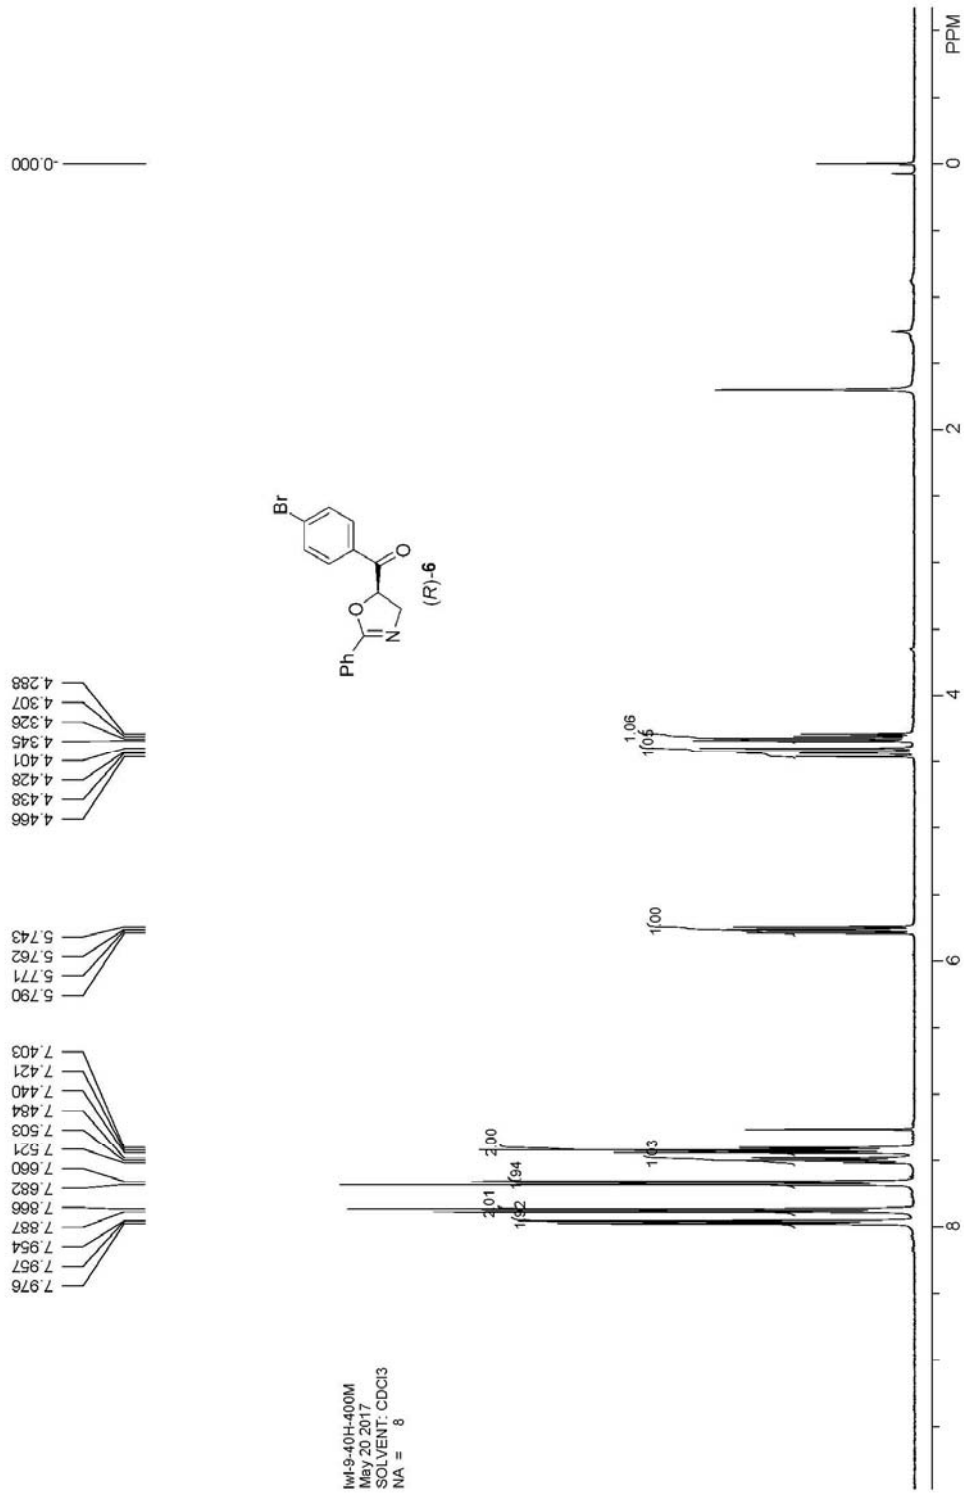

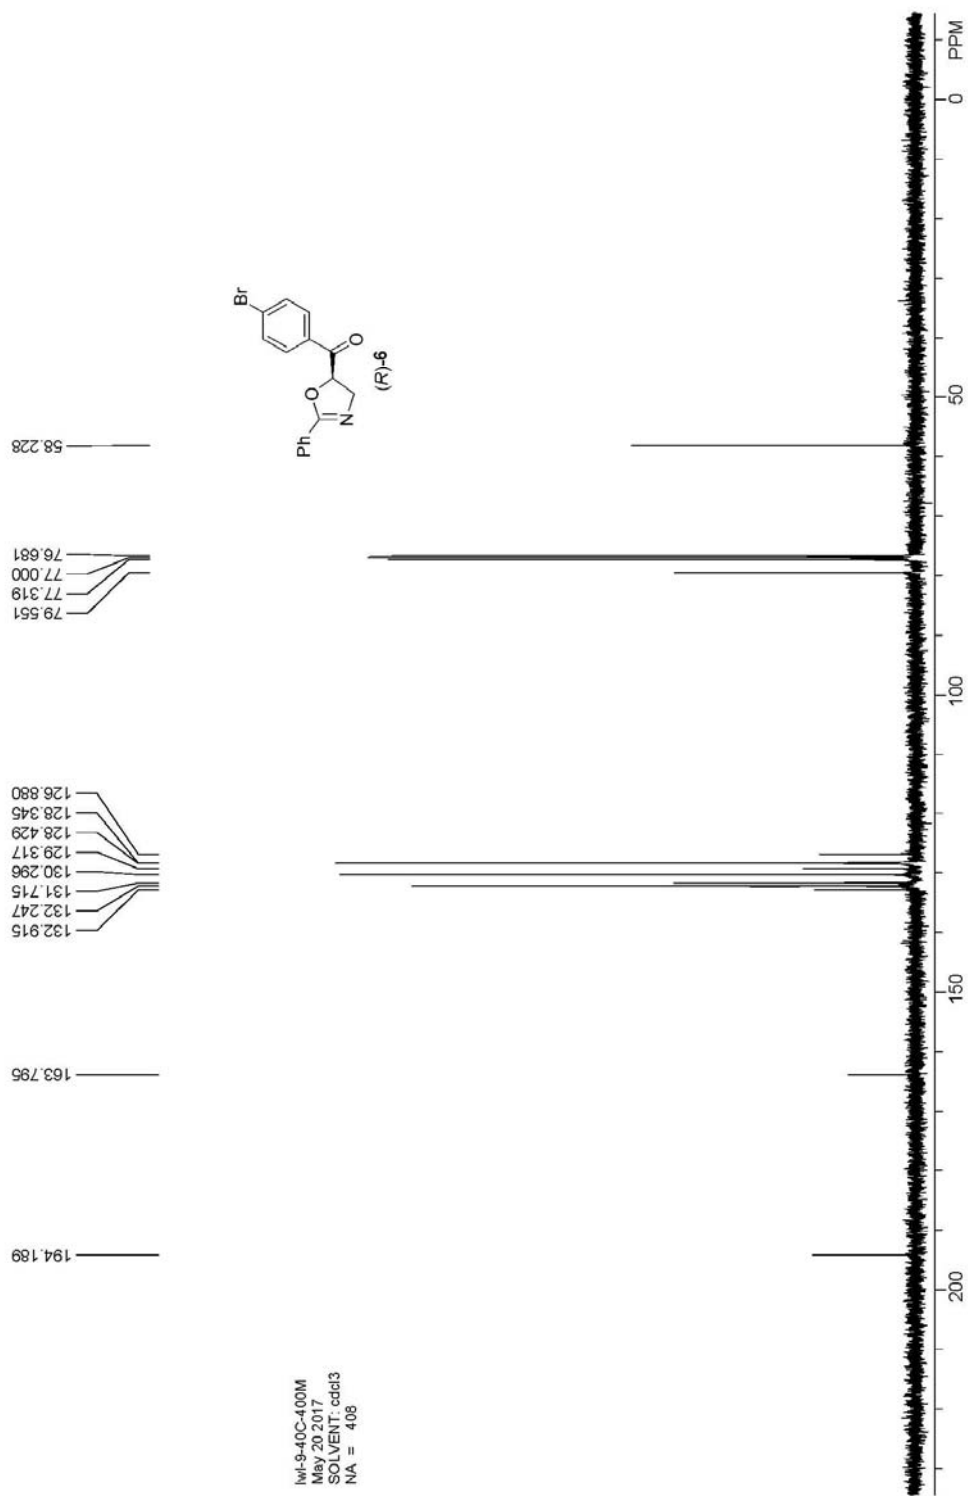

# 1w1-9-40

实验时间: 2017-4-10, 12:02:06

报告时间: 2017-5-31, 14:45:42

谱图文件: F:\slf\1w1\2017-4-10\1w1-9-40-oj-70+30-1-214.org

实验内容简介:

oj-h 70:30

214nm 1.0ml/min

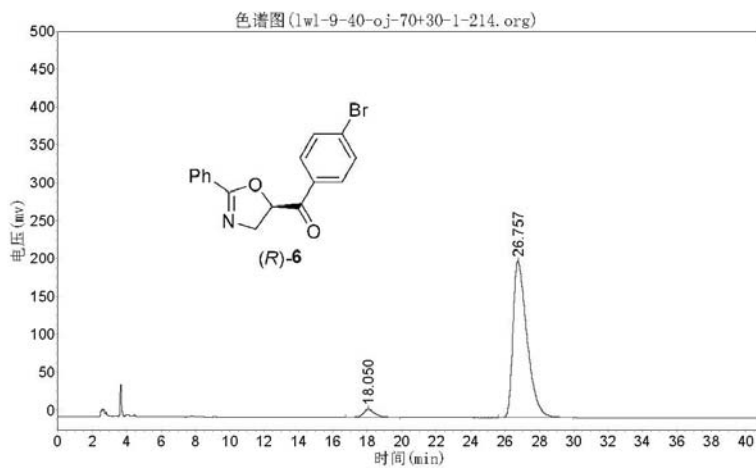

分析结果表

| 峰号 | 峰名 | 保留时间   | 峰高         | 峰面积          | 含量       |
|----|----|--------|------------|--------------|----------|
| 1  |    | 18.050 | 10396.275  | 503601.844   | 4.1432   |
| 2  |    | 26.757 | 206053.266 | 11651405.000 | 95.8568  |
| 总计 |    |        | 216449.541 | 12155006.844 | 100.0000 |

## 1wl-9-27-rac

实验时间: 2017-04-10, 11:15:58  
谱图文件: F:\sif\1wl\2017-4-10\1wl-9-27-rac-oj-70+30-1-214.org

报告时间: 2017-04-10, 12:05:10

实验内容简介:  
oj-h 70:30  
214nm 1.0ml/min

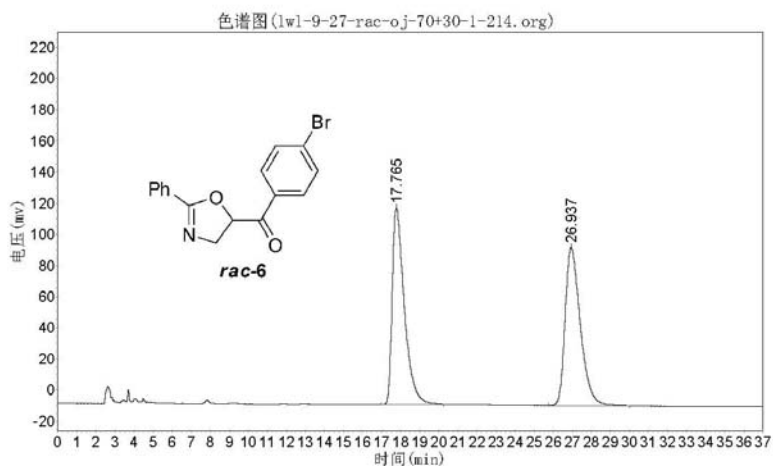

分析结果表

| 峰号 | 峰名 | 保留时间   | 峰高         | 峰面积          | 含量       |
|----|----|--------|------------|--------------|----------|
| 1  |    | 17.765 | 126566.875 | 5636427.000  | 50.0930  |
| 2  |    | 26.937 | 101688.938 | 5615507.000  | 49.9070  |
| 总计 |    |        | 228255.813 | 11251934.000 | 100.0000 |
